# Supplementary material for: Comparative transcriptomic analysis reveals potential mechanisms for high tolerance to submergence in arbor willows
Source: PeerJ. 2022 Feb 3;10:e12881. doi: 10.7717/peerj.12881 (PMC8818271; doi:10.7717/peerj.12881)
Supplement: Supplemental Information 1 [file peerj-10-12881-s001.xlsx]

## Sheet: All.DEG_final
Table S9 22790 DEGs from 25 comparisons
#ID	WR-CK1	WR-CK2	WR-CK3	WR-CK	WR-4h1	WR-4h2	WR-4h3	WR-4h	WR-12h1	WR-12h2	WR-12h3	WR-12h	WR-24h1	WR-24h2	WR-24h3	WR-24h	WR-48h1	WR-48h2	WR-48h3	WR-48h	WSYL-CK1	WSYL-CK2	WSYL-CK3	WSYL-CK	WSYL-4h1	WSYL-4h2	WSYL-4h3	WSYL-4h	WSYL-12h1	WSYL-12h2	WSYL-12h3	WSYL-12h	WSYL-24h1	WSYL-24h2	WSYL-24h3	WSYL-24h	WSYL-48h1	WSYL-48h2	WSYL-48h3	WSYL-48h
EVM0041346	2.41259	3.20946	3.61004	3.07736	0.80774	1.10705	0.366694	0.760495	0.138473	0.364721	0.247919	0.250371	0.096913	0	0.271174	0.122696	0.621543	0.562545	0.978257	0.720782	1.24027	2.23906	1.66039	1.71324	0.513556	0.889815	0.888209	0.76386	0.609467	0.619735	0.47332	0.567507	0.180723	0.197405	0.39627	0.258133	0.589248	1.15762	0.472503	0.739791
EVM0041347	7.44555	7.7783	7.95583	7.72656	7.4882	7.05757	6.40419	6.98332	13.8703	15.0715	14.4203	14.454	6.92043	7.71207	8.19738	7.60996	6.41503	6.26604	7.96327	6.88145	9.16962	8.8274	8.00832	8.66845	7.33463	8.5187	8.01676	7.95669	12.7195	12.2629	14.5856	13.1893	10.3889	9.05684	9.53028	9.65867	9.96595	8.03912	9.01712	9.0074
EVM0041342	2.41157	2.33517	2.22423	2.32366	1.02789	1.80759	1.24687	1.36078	1.16189	1.00271	0.907512	1.02404	0.981373	0.642642	0.651308	0.758441	1.07899	1.44586	1.01787	1.18091	3.06903	2.2498	2.95589	2.75824	1.10925	1.418	1.27339	1.26688	1.5089	1.29818	1.91302	1.57337	1.33402	0.833458	0.834452	1.00064	0.696699	1.54653	1.51901	1.25408
EVM0041349	4.05524	3.50238	3.99074	3.84945	3.06079	2.44362	1.72121	2.40854	6.54973	9.56511	9.2651	8.45998	17.9476	18.4513	13.5633	16.6541	8.11974	9.78092	8.54472	8.81513	5.46914	5.12819	5.95509	5.51748	10.6511	10.1287	10.5603	10.4467	9.72632	10.0257	11.1621	10.3047	13.1184	13.8742	14.5341	13.8422	14.3364	15.2933	15.1962	14.942
EVM0056770	2.41897	2.67385	2.06809	2.38697	3.40898	4.22285	3.21846	3.61676	1.63126	1.57088	1.80806	1.67006	2.78912	0.73735	1.15168	1.55939	2.46266	1.89119	1.64096	1.99827	1.57706	1.85924	1.93433	1.79021	4.15074	2.67812	3.06032	3.2964	3.58461	1.78659	2.60543	2.65888	1.97755	1.82756	1.5925	1.79921	2.04261	2.44699	2.24338	2.24433
EVM0005966	1.99701	2.06418	1.88715	1.98278	1.15195	1.4795	1.5593	1.39692	0.695239	0.977048	0.682015	0.784767	0.32796	0.484697	0.223765	0.345474	0.416943	0.104772	0.207587	0.243101	0.211451	0.377002	0.431028	0.339827	1.76049	1.99877	1.24636	1.66854	0	0.705614	0.316516	0.34071	0.182433	0.36645	0.459541	0.336141	0.03375	0.214984	0.185311	0.144682
EVM0050113	4.40402	5.4972	3.77925	4.56016	3.19725	3.54108	4.4356	3.72464	7.24205	5.02385	4.68851	5.65147	5.67046	4.81521	6.25676	5.58081	6.51339	6.58754	5.84861	6.31651	6.08223	6.01666	6.10447	6.06779	3.12824	4.52888	3.46122	3.70611	6.77867	11.7829	8.21847	8.92666	7.78167	7.70631	7.49112	7.6597	7.90452	7.77646	7.3541	7.67836
EVM0005267	28.106	27.4767	25.8323	27.1383	34.3537	32.434	34.2514	33.6797	98.016	91.4272	105.028	98.1572	48.2622	47.2357	49.9761	48.4913	42.0803	43.1005	37.6652	40.9487	29.7633	31.9403	31.1062	30.9366	43.337	44.4972	44.4042	44.0795	102.314	99.2898	93.9721	98.5251	36.407	38.2957	38.8573	37.8533	43.2305	42.8618	41.919	42.6705
EVM0028168	0.966217	1.11291	1.42544	1.16819	0.691662	0.487906	0.782992	0.654187	0.585508	0.338031	0.555972	0.49317	0.367206	0.295765	0.464163	0.375711	0.485893	0.428048	0.325724	0.413222	1.34167	1.25418	0.96069	1.18551	0.562355	0.668557	0.626526	0.619146	0.520947	0.736615	0.572866	0.610143	0.338526	0.261116	0.455876	0.351839	0.584907	0.492336	0.595481	0.557575
EVM0017155	42.491	51.1272	42.7124	45.4435	34.9685	33.1281	32.7071	33.6012	22.3451	22.3712	20.9563	21.8909	13.905	15.517	14.6649	14.6956	16.9875	14.5203	16.875	16.1276	37.0448	31.4055	35.9994	34.8166	27.4612	26.4951	25.2409	26.3991	20.4898	18.5002	19.1724	19.3874	13.6777	12.6389	11.5702	12.629	14.3472	13.6821	12.8004	13.6099
EVM0029347	5.31123	5.46589	7.15659	5.9779	7.79243	7.48836	7.07662	7.45247	13.2461	12.45	11.1776	12.2912	12.1203	11.544	12.0019	11.8887	9.69603	8.74212	9.26673	9.23496	5.77485	6.31461	6.98608	6.35851	6.111	5.88119	5.14351	5.7119	9.32415	11.3561	9.21231	9.96417	11.4022	11.3248	12.958	11.895	10.1041	9.7459	11.4286	10.4262
EVM0005260	0.745196	0.833295	0.662811	0.747101	1.32967	0.880092	0.925553	1.04511	0.087619	0.665627	0.248009	0.333752	0.289259	0.168737	0.518849	0.325615	0.347992	0.449578	0.28065	0.359407	1.00712	0.877174	0.761925	0.882074	0.050639	0.787428	0.423453	0.420507	0.729934	0.450383	0.326896	0.502404	0.076659	0.408303	0.198674	0.227879	0.480917	0.418005	0	0.299641
EVM0029344	1.7789	1.85907	2.28484	1.97427	2.53616	1.55394	2.88292	2.32434	3.62995	3.44473	3.47873	3.5178	4.00472	4.82906	4.09373	4.30917	3.0608	3.31729	3.74405	3.37405	0.251323	0.150452	0.230984	0.21092	0.29254	0.478862	0.424383	0.398595	0.239783	0.148513	0.339329	0.242542	0.527614	0.458212	0.725254	0.57036	0.139591	0.666901	0.355038	0.387177
EVM0029340	0.625695	0.724679	1.11562	0.821997	0.949531	0.696564	0.74019	0.795428	0.818059	1.02994	0.701187	0.849728	0.22984	0.207953	0.315813	0.251202	0.397434	0.425987	0.553101	0.458841	1.19874	0.766539	1.62097	1.19542	0.60751	0.364831	0.530513	0.500951	0.817204	0.880889	0.898039	0.865377	0.29047	0.475048	0.39542	0.386979	0.616217	0.636167	0.367785	0.540056
EVM0029341	0.34687	1.03754	1.23891	0.874441	8.34634	8.73403	8.72962	8.60333	9.99875	10.26	10.6312	10.2967	4.0735	4.13034	3.06733	3.75706	1.41095	1.20732	1.68019	1.43282	0.523106	0.286762	0.549209	0.453026	3.13653	3.47425	4.14814	3.58631	2.78979	4.89575	3.09117	3.59223	1.69875	2.22182	2.68094	2.2005	1.38235	0.688795	0.979533	1.01689
EVM0057221	6.44966	6.83653	6.8311	6.70576	5.10534	4.39979	5.68173	5.06229	8.66023	10.4265	9.09161	9.39278	15.5125	13.8425	15.5511	14.9687	12.0068	10.5317	11.5019	11.3468	3.26951	3.37113	3.71996	3.45353	3.38882	3.30411	2.71332	3.13542	4.91308	4.05945	4.43074	4.46776	6.26671	7.04793	5.72148	6.34537	7.81393	7.31639	6.4411	7.19048
EVM0001584	3.17081	3.39934	3.2853	3.28515	6.05826	5.61432	5.64774	5.77344	5.06942	4.74768	4.53986	4.78565	3.26982	3.49158	3.55773	3.43971	2.70043	2.7854	3.30729	2.93104	2.49361	2.5798	2.56302	2.54548	6.59427	6.14599	5.83103	6.19043	5.65627	5.39008	5.45005	5.4988	3.37591	3.31023	3.55973	3.41529	3.41909	2.66063	3.25405	3.11125
EVM0001588	4.05518	4.56278	4.92683	4.51493	2.80717	2.04295	2.53153	2.46055	2.45106	2.74397	3.56836	2.92113	1.03411	2.19276	1.86214	1.69634	2.13053	1.96862	1.95347	2.01754	3.67787	4.03655	5.14291	4.28577	2.40073	3.17096	2.72122	2.7643	2.98438	4.03047	4.36465	3.79317	1.12713	2.52412	2.34646	1.99924	2.76566	2.76617	2.3188	2.61688
EVM0001589	1.22693	1.76465	1.88107	1.62422	0.710287	0.471156	0.383167	0.521537	0.348601	0.732629	0.198666	0.426632	0.291867	0.18333	0.124552	0.199916	0.210503	0.700901	0.574641	0.495348	1.44127	1.04173	0.638104	1.04037	1.56638	1.27032	1.40912	1.41527	0.828956	1.09895	1.9911	1.30634	1.03634	0.181066	0.451831	0.556411	0.424113	0.561267	1.07995	0.688443
EVM0011313	2.90362	2.92425	2.94238	2.92342	3.56628	5.26509	5.53712	4.7895	3.80806	2.44224	3.00579	3.08537	1.66814	0.71801	1.75899	1.38171	3.11537	2.65981	3.51568	3.09695	6.706	6.16635	7.15733	6.67656	18.3335	19.7558	18.0971	18.7288	9.93328	9.87268	8.68448	9.49681	6.60514	6.15412	5.16249	5.97392	8.1164	6.72125	8.26814	7.70193
EVM0003497	1.10392	2.11611	1.75808	1.65937	0.762895	0.759427	1.13715	0.886491	0.926803	1.37858	1.29286	1.19941	0.830727	0.928162	1.14966	0.969516	2.10517	0.888065	0.618695	1.20398	5.95281	4.61984	5.70604	5.42623	3.68356	2.53617	4.82094	3.68022	3.26774	1.91811	3.04175	2.74253	1.28855	1.92476	1.65445	1.62258	2.02979	1.40687	2.75695	2.06454
EVM0036804	0.303732	0.349169	0.492864	0.381922	0.487182	0.207771	0.560516	0.41849	1.35032	1.11254	1.2595	1.24079	0.834555	0.533644	0.843038	0.737079	0.816618	0.824411	0.805007	0.815345	0.319055	0.236298	0.270853	0.275402	0.357506	0.329973	0.245826	0.311102	0.373562	0.504594	0.84604	0.574732	0.308802	0.335805	0.305806	0.316804	0.762346	0.541109	0.521483	0.608313
EVM0036806	51.9227	57.0289	48.3756	52.4424	29.6258	32.184	29.8518	30.5538	39.4717	42.0596	36.7661	39.4324	63.6006	60.478	65.7707	63.2831	50.5184	48.2303	51.5745	50.1077	57.2586	61.2572	57.9954	58.8371	48.6883	39.0498	44.5418	44.0933	47.3641	44.3994	46.2651	46.0096	60.3648	56.5198	50.8379	55.9075	63.8249	64.646	60.1172	62.8627
EVM0036801	1.47443	1.78201	1.18441	1.48028	1.87132	2.46907	1.86675	2.06905	0.914867	0.764401	0.944663	0.874644	0.396125	0.337157	0.324392	0.352558	0.651275	0.730775	1.21007	0.86404	0.778349	0.907407	1.12496	0.936905	1.9239	1.90373	1.22413	1.68392	1.00959	0.999219	0.727734	0.912181	0.494109	0.640814	0.591832	0.575585	0.757884	1.02357	0.557577	0.779677
EVM0036800	3.00495	4.24564	2.47498	3.24185	1.07858	1.01577	1.75064	1.28166	1.13418	0.875912	1.29582	1.10197	1.7292	0.961667	1.1386	1.27649	1.8588	1.71054	1.91859	1.82931	6.95852	5.70004	4.0044	5.55432	1.44138	0.98361	1.06655	1.16385	0.760649	1.15491	0.939233	0.951597	1.69113	1.72539	1.87267	1.76306	1.44773	1.12638	1.17945	1.25118
EVM0036808	1.38103	1.94893	2.29145	1.8738	1.8431	2.19693	2.54207	2.19403	1.82839	1.6743	2.17748	1.89339	2.66583	3.55126	3.44506	3.22072	4.5721	4.02472	3.28664	3.96115	3.24503	3.03043	3.05047	3.10865	1.96484	2.67564	1.85266	2.16438	2.22511	1.85133	2.29452	2.12365	4.17871	3.61573	3.02105	3.60516	3.94886	4.16961	4.50265	4.20704
EVM0032136	8.11143	8.80959	5.98506	7.63536	12.3201	11.7149	11.0211	11.6854	8.21918	9.71233	8.59644	8.84265	5.96361	4.64254	4.53342	5.04653	5.12421	6.03274	4.3349	5.16395	8.05458	8.69471	6.71618	7.82182	9.46531	9.73654	8.92644	9.3761	12.8883	12.8939	11.2844	12.3555	7.04971	7.09156	7.05903	7.06677	5.5932	5.54696	5.43802	5.52606
EVM0032130	11.6031	14.3083	10.8475	12.253	8.64961	7.9223	7.97366	8.18186	15.0076	16.4903	16.7366	16.0782	11.5548	10.7615	9.52316	10.6132	14.8044	14.8142	15.4138	15.0108	24.132	20.3671	20.8626	21.7872	19.2997	16.0901	19.4165	18.2688	22.5516	23.1364	27.8941	24.5274	22.3498	22.5719	20.2941	21.7386	15.5673	16.8713	20.7533	17.7307
EVM0003498	0.888903	0.980167	0.832469	0.900513	1.14495	0.858674	0.524931	0.842852	0.570095	0.408656	1.15802	0.712258	0.166139	0.056469	0	0.0742027	0.316144	0.292759	0.82688	0.478594	0.721986	0.591905	0.981918	0.76527	1.42203	1.34064	1.8273	1.52999	0.734314	0.590861	1.11246	0.812545	0.294884	0.770411	0.170116	0.411804	0.316312	0.203227	0.311761	0.2771
EVM0040126	7.5801	7.36928	7.92585	7.62508	3.83886	4.01339	4.46872	4.10699	3.52912	4.20475	4.46027	4.06471	1.6494	1.95929	1.00529	1.53799	2.65885	3.68687	2.3574	2.90104	8.18642	7.44681	7.80366	7.8123	4.09754	4.3174	3.75264	4.05586	3.5831	5.01994	4.31113	4.30472	2.22595	1.98337	1.51786	1.90906	3.86995	2.9314	3.66344	3.48826
EVM0030403	4.2629	3.38935	3.59175	3.748	2.52196	2.27585	3.08754	2.62845	3.18642	2.50932	3.29135	2.99569	1.85895	1.94685	2.17082	1.99221	4.04847	3.48993	3.42073	3.65304	4.10161	4.41892	3.94131	4.15395	2.788	2.0168	2.07941	2.29474	1.855	2.19136	1.8713	1.97255	1.87542	1.95444	1.49837	1.77608	3.57576	2.23929	2.98462	2.93323
EVM0040121	9.68072	9.01371	7.74517	8.8132	6.3584	9.7692	8.56573	8.23111	6.82357	6.682	7.84804	7.11787	2.19227	1.60296	2.0421	1.94578	3.87891	4.21742	3.49024	3.86219	3.77318	3.49575	4.40419	3.89104	1.80164	2.2281	1.67803	1.90259	1.29922	1.68949	2.04452	1.67774	0.415976	0.254976	0.649487	0.440146	0.586182	0.675368	1.0778	0.779784
EVM0000188	0.24076	0.446026	0.338406	0.341731	0.786227	1.29369	1.1402	1.07337	5.9728	6.14961	6.9384	6.3536	3.24049	3.14614	3.09534	3.16066	4.59577	5.10189	5.31603	5.00456	2.45788	3.08541	2.09538	2.54622	1.75569	1.51322	1.71367	1.66086	8.83902	10.0176	10.7515	9.86936	4.83648	3.99714	5.93387	4.92249	8.23689	5.71567	6.89572	6.94943
EVM0055521	21.4864	18.7493	22.019	20.7516	13.0379	14.7375	14.0662	13.9472	10.8681	10.9755	10.4807	10.7748	9.22005	9.20816	9.69999	9.37607	11.1417	8.1941	7.9036	9.07979	8.99836	8.91603	8.90195	8.93878	9.04731	9.30031	9.11317	9.15359	6.53801	6.36753	6.13912	6.34822	6.38675	7.21026	6.2128	6.60327	6.04148	6.53801	6.46584	6.34844
EVM0000184	10.0119	11.1565	10.1716	10.4467	4.42242	3.98185	3.48829	3.96419	2.46278	2.27052	2.70452	2.47927	26.8998	27.9105	28.8793	27.8965	39.9457	40.9653	41.5063	40.8058	13.565	15.0594	15.312	14.6455	3.45803	3.63159	3.20205	3.43055	1.49527	1.76009	1.66089	1.63875	22.3768	26.0685	25.2435	24.5629	36.4783	39.2307	35.9521	37.2204
EVM0025650	22.3286	22.2424	21.9055	22.1588	16.7256	16.3424	18.396	17.1547	13.1999	12.1846	12.3794	12.5879	7.57723	7.87564	6.96126	7.47137	6.40273	6.49493	5.50033	6.13266	12.0595	13.9608	14.2282	13.4162	33.6622	35.4616	34.814	34.6459	8.65434	9.44529	9.38332	9.16099	13.8577	14.5831	14.4824	14.3077	7.11617	5.45295	6.41949	6.32954
EVM0000957	10.4772	12.5663	13.2009	12.0815	14.682	15.7126	16.7112	15.702	25.647	30.1932	27.6426	27.8276	60.8708	60.2333	62.9432	61.3491	32.8102	29.0831	31.5834	31.1589	20.274	21.8222	22.2572	21.4511	29.9281	30.0237	28.4897	29.4805	8.82999	9.79193	11.4066	10.0095	36.705	36.3682	35.4255	36.1662	33.8948	30.3668	30.546	31.6025
EVM0025652	5.17164	5.15731	5.68749	5.33881	2.32986	2.5811	2.52656	2.47917	6.80898	5.40332	6.86298	6.35843	4.89774	5.23729	6.5682	5.56774	5.14311	6.03568	6.70181	5.9602	2.3545	1.84271	2.33768	2.1783	2.35535	2.64898	2.57575	2.52669	4.141	3.44493	3.32734	3.63776	2.95458	3.57145	3.14119	3.22241	3.72981	4.3909	3.7405	3.95374
EVM0008786	0.587451	0.433601	0.691989	0.571014	0.932052	0.287343	1.02699	0.748796	0.492839	0.461382	0.375746	0.443322	0.190425	0.435419	0.098123	0.241322	0.531554	0.234405	0.309951	0.358637	2.79017	2.82203	2.37104	2.66108	1.00568	1.37029	1.30618	1.22738	0.897162	0.981632	0.746014	0.874936	0.732222	1.11289	0.84128	0.895463	1.36808	1.44229	1.16205	1.32414
EVM0008784	9.56057	10.6875	10.0584	10.1022	7.44131	5.94731	6.20972	6.53278	4.98064	4.60478	4.8742	4.81988	1.94365	1.76144	1.92452	1.87654	2.78606	2.91866	2.7057	2.80347	7.90516	9.25193	6.06186	7.73965	6.95901	5.24593	4.74865	5.6512	3.61679	3.799	4.00127	3.80569	2.73184	2.51615	3.08114	2.77638	4.02987	4.04938	3.73398	3.93774
EVM0000233	3.89693	2.2917	3.16616	3.11826	3.21383	2.4502	2.5268	2.73028	4.88619	4.8672	5.10481	4.95274	3.54487	3.3645	3.16445	3.35794	3.19864	3.19422	3.55132	3.31473	2.59589	2.28896	1.98503	2.28996	2.08914	1.68264	1.48089	1.75089	2.84587	2.96221	2.82644	2.87817	2.7307	2.33087	2.18766	2.41641	3.9881	4.05948	4.55066	4.19941
EVM0041832	12.4371	13.4386	10.0224	11.966	15.4241	15.1403	13.8682	14.8109	15.2708	16.1385	15.1668	15.5253	7.83446	7.40261	9.66856	8.30188	10.2175	10.343	8.85655	9.80567	9.76678	10.0841	11.5461	10.4656	12.4689	12.134	11.2984	11.9671	16.8429	16.7201	16.5103	16.6911	8.74113	7.46492	9.0279	8.41132	7.62907	8.18978	7.42656	7.74847
EVM0041835	8.95913	9.20069	9.12511	9.09497	6.44288	6.14143	6.13556	6.23996	43.3768	43.1824	43.8014	43.4535	8.11356	8.55277	8.59794	8.42143	15.0436	15.3889	14.2531	14.8952	13.7639	15.3408	14.4581	14.5209	11.9754	12.4278	12.5158	12.3063	59.4163	56.8578	58.8942	58.3894	13.0751	12.8585	11.5073	12.4803	19.1118	18.2188	19.5103	18.9469
EVM0015036	0.588682	0.2634	0.100629	0.31757	0	0.361051	0.131703	0.164251	0.895385	1.71952	0.798053	1.13765	1.5608	1.72898	1.38896	1.55958	0.56489	0.516037	0.398893	0.493273	1.04017	1.16499	1.05311	1.08609	0.816805	0.674537	0.813784	0.768375	1.08551	1.30111	0.683084	1.02323	1.27618	1.54561	1.54644	1.45608	1.65529	0.516304	1.14779	1.10646
EVM0015033	7.0239	8.7393	9.20464	8.32261	8.90556	9.611	8.38701	8.96786	6.14578	8.22349	6.21629	6.86185	4.88499	4.58119	4.2581	4.57476	3.98017	4.60811	5.23679	4.60836	4.3303	3.87754	4.77734	4.32839	6.02274	5.21863	4.25162	5.16433	6.34989	4.94702	4.61539	5.3041	2.26837	1.86168	2.69255	2.2742	3.05256	2.74945	2.6099	2.80397
EVM0033262	7.53736	11.9949	7.04838	8.86022	19.762	21.7599	20.771	20.7643	16.4138	20.3146	18.0203	18.2496	12.5675	11.8511	12.8494	12.4227	9.29125	10.4849	7.83324	9.20314	2.80079	3.07703	2.25709	2.71163	29.4719	31.4837	28.6674	29.8743	14.7438	15.0178	18.2031	15.9883	19.5381	13.2854	17.6165	16.8134	18.9966	13.4502	17.4132	16.62
EVM0033260	0.047348	0	0	0.0157827	0.414071	0.396848	0.03777	0.282896	0.456802	0.786	0.914927	0.719243	0.662637	0.27475	0.70306	0.546816	0.87225	1.35759	1.00385	1.0779	1.07812	1.11356	0.635022	0.942232	0.370307	0.389178	0.445987	0.401824	0.913111	1.00826	1.18411	1.03516	1.19158	1.36929	1.33912	1.3	1.37419	1.54895	1.6921	1.53841
EVM0009784	25.5442	22.3461	28.0375	25.3093	28.5628	34.4612	30.6807	31.2349	55.9601	59.7818	54.4597	56.7339	199.25	198.011	167.702	188.321	120.265	126.412	125.026	123.901	39.7714	46.21	43.1158	43.0324	60.4062	58.9653	54.9544	58.1086	49.6031	58.968	55.4835	54.6849	162.923	151.686	149.668	154.759	139.263	144.634	138.202	140.699
EVM0012565	1.82078	1.64394	1.65572	1.70681	1.57295	1.99875	1.80013	1.79061	1.87167	1.64158	1.82386	1.77904	2.97538	2.51541	2.60512	2.69864	1.67573	2.21011	1.73747	1.87444	0.553387	0.45948	0.618647	0.543838	0.537583	0.490514	0.408088	0.478728	0.264166	0.175957	0.185456	0.208526	0.426811	0.414112	0.501797	0.447573	0.377658	0.59659	0.448474	0.474241
EVM0012567	9.24542	11.5859	8.63093	9.82076	15.9265	16.7489	17.1075	16.5943	11.0004	10.8787	10.7155	10.8649	8.58956	9.21312	7.30443	8.36904	8.88014	10.1658	10.7221	9.92268	9.16123	10.4607	10.3643	9.99542	17.8691	21.809	19.5178	19.732	11.4556	11.4905	12.9424	11.9628	10.5064	9.83253	10.5755	10.3048	10.7617	13.3811	13.5922	12.5783
EVM0012560	19.553	18.4001	20.0915	19.3482	15.1646	17.8152	13.7917	15.5905	15.747	15.0676	15.1232	15.3126	5.62034	6.22174	6.25787	6.03332	6.34863	6.00348	7.31547	6.55586	16.9731	19.7289	19.9217	18.8745	22.4641	26.3291	24.5046	24.4326	18.7311	17.1161	21.6702	19.1725	7.05853	7.20738	6.60088	6.9556	6.19578	5.45764	6.39988	6.01777
EVM0051808	2.59216	4.56841	3.00286	3.38781	3.56044	5.68264	4.51529	4.58612	2.50655	3.31292	1.68325	2.50091	1.78852	1.30142	2.24225	1.7774	1.91877	1.75959	1.7214	1.79992	5.75662	6.09118	4.62356	5.49046	5.71963	6.19218	5.91898	5.9436	4.3254	5.20718	6.57478	5.36912	4.30983	2.96435	2.87773	3.38397	3.60968	4.76228	3.63641	4.00279
EVM0012563	16.0964	16.4709	17.3237	16.6303	9.51482	8.71039	11.0465	9.75725	7.13175	6.5991	7.15987	6.96357	3.40564	3.18348	3.28176	3.29029	3.73023	4.4797	4.2591	4.15634	20.6881	19.3002	21.4098	20.466	10.9718	10.4788	10.4931	10.6479	8.59769	8.59979	8.44323	8.5469	6.47016	7.99252	7.53616	7.33295	5.77503	6.30835	6.36502	6.14947
EVM0051801	0.956924	1.49797	2.15965	1.53818	55.6772	47.5675	43.5392	48.928	26.7037	20.6371	18.7566	22.0325	31.075	25.441	26.1134	27.5431	8.5078	11.5728	10.1806	10.0871	16.2327	17.4569	13.3439	15.6778	24.291	27.1525	20.8722	24.1052	3.09054	1.92196	1.83561	2.2827	21.0178	18.8802	19.9667	19.9549	9.21133	9.75109	11.4738	10.1454
EVM0045423	42.8007	46.7024	43.2674	44.2568	37.0356	39.3531	41.0691	39.1526	43.8104	44.046	46.264	44.7068	31.2059	32.0451	29.4232	30.8914	36.9805	39.5568	40.6781	39.0718	33.9368	31.1785	30.4964	31.8705	46.352	54.1729	53.0682	51.1977	53.9733	50.005	49.5601	51.1795	61.1683	58.0046	60.0154	59.7294	73.0621	76.215	78.4344	75.9038
EVM0043478	1.92486	3.61737	3.43395	2.99206	1.74275	2.04454	1.47246	1.75325	2.43714	2.11976	2.21622	2.2577	3.28677	3.69742	2.59809	3.19409	4.30755	4.53785	3.23248	4.02596	2.29586	2.84987	2.92119	2.68897	2.0543	2.19245	2.89698	2.38124	3.23957	2.27148	3.3399	2.95032	4.73592	3.22983	3.57141	3.84572	3.38476	4.49736	4.2232	4.0351
EVM0007634	2.1626	2.12157	2.74899	2.34439	2.05357	2.32496	1.81756	2.06536	1.81135	1.51249	1.53174	1.61853	0.681848	0.949988	0.953323	0.86172	0.766267	1.53777	1.00673	1.10359	2.69054	2.31453	1.73573	2.24693	2.49499	2.0074	2.79144	2.43128	3.07693	3.24008	3.1372	3.1514	1.37555	1.28989	1.30314	1.32286	2.25003	1.84598	1.7518	1.94927
EVM0007635	6.3003	5.10623	6.50961	5.97205	3.35869	4.01531	3.63339	3.66913	2.22094	3.15223	3.04393	2.8057	2.62819	3.31308	2.62395	2.85507	3.93942	4.63161	3.87927	4.1501	9.01947	7.89092	7.13233	8.01424	4.66801	3.21035	3.47658	3.78498	3.68933	4.16828	4.78992	4.21584	3.56859	3.33388	3.51398	3.47215	4.30356	4.3843	3.74386	4.14391
EVM0043471	0.580057	0.392432	0.700497	0.557662	0.391706	1.4769	1.09945	0.989352	0.798523	0.778763	0.301654	0.626313	3.67312	2.91461	3.26253	3.28342	2.89469	2.04769	2.35725	2.43321	0.037696	0.27221	0.212	0.173969	2.39569	2.16714	2.14125	2.23469	3.19631	3.22232	2.70877	3.04247	3.90346	6.36902	7.4437	5.90539	4.64717	5.94584	5.51132	5.36811
EVM0011911	1.68118	1.17911	1.49481	1.4517	1.46924	2.20581	0.971517	1.54885	1.245	0.649907	0.835331	0.910078	0.998305	1.02926	0.729879	0.919147	0.654196	1.36967	1.58012	1.20133	2.05901	0.938577	1.88324	1.62694	2.1439	1.07627	1.42325	1.54781	1.9993	3.06804	2.57966	2.549	1.43692	0.355814	2.01488	1.2692	1.73625	1.23316	2.13645	1.70195
EVM0007181	0.882674	0.663573	1.22277	0.923005	0.731502	0.735369	0.992091	0.819654	0.409385	0.581751	0.619396	0.536844	0.689978	0.802507	0.600168	0.697551	0.693428	0.621064	0.75604	0.690177	1.28733	1.30227	1.62062	1.40341	1.41434	1.47751	1.50904	1.46697	1.34341	1.35645	1.25098	1.31695	1.23235	1.69601	1.27616	1.40151	1.08059	1.60742	1.6795	1.45583
EVM0007182	30.9979	25.2841	28.0736	28.1185	15.8933	12.5285	12.6918	13.7045	9.48985	13.8405	10.9911	11.4405	2.77059	5.12275	2.52476	3.4727	9.7798	8.98846	8.64144	9.13657	19.2161	21.981	24.3668	21.8546	14.1883	13.6021	14.865	14.2185	13.7871	12.0994	12.4657	12.7841	5.83527	7.15861	8.30996	7.10128	10.5009	8.92023	8.91201	9.44437
EVM0003019	0.447885	0.483532	0.491016	0.474144	0.275555	0.2921	0.377155	0.314937	0.604163	0.311895	0.483965	0.466674	0.402758	0.348482	0.247333	0.332858	0.862389	0.579144	1.09362	0.845052	0.750343	0.765328	0.956522	0.824064	0.329541	0.357196	0.442135	0.376291	0.96775	1.22153	1.22061	1.13663	0.927954	0.828714	0.80321	0.853293	1.07447	1.16166	0.817376	1.01784
EVM0002699	5.2644	5.47096	6.4118	5.71572	7.87121	6.3286	7.14903	7.11628	2.01257	1.60574	1.70419	1.77417	2.9923	2.15456	1.67331	2.27339	3.95603	4.49514	3.79962	4.08359	4.60165	4.87667	3.91196	4.46343	0.700893	1.21699	2.11795	1.34528	0.643765	0.217526	0.421403	0.427565	0.60089	0.525522	0.42536	0.517257	0.565857	0.530843	0.666408	0.587703
EVM0002695	0.71414	1.07943	0.766374	0.853314	0.896252	1.11569	0.762333	0.924757	0.64802	0.527237	0.621648	0.598968	0.60885	0.743117	0.847628	0.733198	0.299471	0.629851	0.529998	0.48644	1.51546	1.66413	2.08734	1.75564	2.15037	2.03548	1.87708	2.02098	1.76033	1.68457	1.82185	1.75559	1.16579	1.85284	0.947041	1.32189	1.41554	1.52978	1.40768	1.451
Salix_babylonica_newGene_2513	0.35176	0.049368	0	0.133709	0.108222	0.424744	0.270255	0.26774	0.140631	0.203063	0.081897	0.141864	0	0	0.268702	0.0895673	0.108776	0.205256	0	0.104677	1.08623	1.22579	0.567314	0.959775	0.519331	0.705695	1.28537	0.8368	0.795424	0.473832	1.50356	0.924272	0.903277	0.867813	1.07077	0.947287	1.43565	1.39746	1.53666	1.45659
EVM0002692	95.0718	93.8665	94.5581	94.4988	65.836	68.0327	67.69	67.1862	133.086	133.933	129.591	132.203	77.8441	79.6211	79.7821	79.0824	51.2546	46.4555	50.0244	49.2448	57.132	57.8089	61.3193	58.7534	45.1014	42.1332	42.7438	43.3261	52.422	56.0728	54.1249	54.2066	36.1623	35.472	36.5128	36.049	30.1316	29.4594	31.4321	30.341
EVM0002691	2.29355	1.75072	2.74517	2.26315	3.50112	3.11307	5.08623	3.90014	6.60732	6.53666	7.05251	6.73216	5.78205	6.71807	5.48168	5.99393	3.90748	3.99885	3.40433	3.77022	4.01792	4.67811	2.63612	3.77738	5.24529	4.81854	5.05918	5.041	7.67844	10.8559	5.29822	7.94418	5.2311	3.62978	3.79509	4.21866	3.51444	5.13152	4.8187	4.48822
EVM0048581	1.40382	0.888486	1.21585	1.16939	0.604815	1.15048	0.538747	0.764681	0.142055	0.317418	0.17826	0.212578	0.396516	0.578657	0	0.325058	0.25216	0.184489	0.219921	0.218857	2.62563	2.16527	2.50414	2.43168	0.618861	0.802602	1.60503	1.00883	0.715185	0.568766	1.10763	0.797194	0.288347	0.734992	1.05417	0.692502	1.17314	1.31647	1.14139	1.21033
EVM0048582	15.2242	19.6122	12.1008	15.6457	5.46216	4.85883	5.14636	5.15578	8.08952	8.87198	7.5477	8.16973	13.803	17.4766	15.4482	15.5759	20.6654	19.1007	21.5321	20.4327	13.2544	11.0765	14.2441	12.8583	6.7028	7.74974	6.48292	6.97848	8.83455	8.94588	8.97786	8.91943	19.5622	20.485	20.0602	20.0358	16.3035	15.5024	17.425	16.4103
EVM0006585	2.07565	2.00122	1.49437	1.85708	1.38179	0.931223	1.40622	1.23974	1.42498	1.03367	1.3847	1.28112	0.902293	0.785311	1.12403	0.937213	1.13992	1.9394	1.61827	1.56586	3.04013	2.88276	2.29252	2.73847	2.65568	1.95827	2.58693	2.40029	2.29346	2.21017	2.27537	2.25967	2.44262	1.73299	3.07675	2.41745	2.33953	2.02393	2.64652	2.33666
EVM0006584	3.01983	5.11668	2.66517	3.60056	2.91343	3.62928	3.63982	3.39417	4.66489	5.15192	4.80943	4.87541	2.81133	2.99539	2.84536	2.88403	2.22413	3.7972	3.41652	3.14595	2.26781	2.23117	2.2925	2.26383	2.24779	1.59588	2.36273	2.0688	3.38342	4.7155	3.79806	3.96566	1.12859	2.05256	1.5257	1.56895	1.68937	1.50609	1.00168	1.39905
EVM0054971	1.8494	1.56147	2.7029	2.03792	1.99542	1.5148	1.77136	1.76053	4.5971	5.17288	3.24965	4.33988	7.26011	5.75136	7.60114	6.87087	5.72984	3.9329	4.55324	4.73866	1.55037	1.61655	1.28239	1.4831	0.877138	1.3243	1.35824	1.18656	1.19082	0.711542	0.648817	0.850394	0.923744	0.9112	2.40122	1.41205	1.10379	1.36434	0.898625	1.12225
EVM0054970	0.269536	0.265122	0.251919	0.262192	0.683244	0.375849	1.57991	0.879669	3.98289	3.85288	3.22259	3.68612	2.54635	2.30821	2.08645	2.31367	0.453094	1.04974	1.24272	0.915184	0.511839	0.301851	0.273383	0.362358	1.71658	1.52048	1.52385	1.58697	2.74906	2.9521	3.03985	2.91367	3.94228	2.48122	2.91197	3.11183	2.92868	3.88929	2.66368	3.16055
EVM0054972	6.4524	7.45791	6.14244	6.68425	4.30419	4.12795	3.93096	4.12104	5.50452	6.55967	6.6351	6.23309	4.81613	4.49502	5.27716	4.86277	6.07477	6.94631	6.19303	6.4047	11.9733	11.6531	11.3948	11.6737	7.96988	10.6427	9.48338	9.36533	12.4525	15.1628	14.2821	13.9658	4.64208	5.66843	6.67692	5.66248	8.64331	8.42216	8.87636	8.64728
EVM0054975	3.68228	4.49272	3.40654	3.86051	1.92549	0.991514	1.4861	1.4677	0.649882	0.429347	0.996195	0.691808	0.799178	0.979432	1.20026	0.992955	1.01147	1.48211	1.83005	1.44121	4.54692	3.85367	3.48846	3.96302	1.74997	1.35078	1.39843	1.49973	1.63679	1.52527	1.56445	1.5755	0.530368	0.748129	1.01175	0.763417	2.45727	1.68881	2.05202	2.06603
EVM0054974	3.77615	3.34923	2.65587	3.26042	4.02703	3.59311	4.00583	3.87532	3.00547	5.4868	3.43214	3.9748	3.34329	3.50132	3.06305	3.30256	3.42277	3.9669	2.99099	3.46022	2.94944	2.57201	2.28467	2.60204	1.83013	1.67372	1.80318	1.76901	1.72439	2.62225	1.90197	2.08287	1.57234	1.53855	1.64079	1.58389	1.68951	1.74968	1.51394	1.65104
EVM0054978	1.41943	1.05971	1.95457	1.47791	1.26459	0.429707	0.47482	0.723039	0.04857	0.296028	0.195985	0.180194	0	0	0.085321	0.0284403	0.125494	0.745787	0.099868	0.323716	1.50579	2.32297	1.46692	1.76523	0.958572	1.49305	1.16152	1.20438	0.291446	0.814069	0.976148	0.693888	0.25384	0.202569	0.614663	0.357024	0.543674	1.00308	0.217439	0.588064
EVM0009052	5.01272	4.71267	3.99068	4.57202	2.09078	1.95762	2.31436	2.12092	1.21301	1.64331	1.22148	1.35927	0.554842	0.936121	1.01031	0.833758	1.38128	3.50534	1.57038	2.15233	2.98633	3.30985	3.39379	3.22999	2.59047	2.57385	3.48623	2.88351	2.07246	2.35386	2.76008	2.39546	1.84083	1.93979	2.12724	1.96928	1.22789	2.37699	2.12247	1.90911
EVM0052727	7.16004	6.12548	5.15935	6.14829	8.29927	7.46994	6.46732	7.41217	5.58479	4.54697	3.71723	4.61633	1.38439	1.24425	2.62178	1.75014	2.94924	4.77611	4.80487	4.17674	4.49399	4.60212	3.64362	4.24658	3.9912	4.54441	5.55298	4.6962	4.00229	3.16422	4.12155	3.76268	1.96245	2.6915	2.2703	2.30808	2.88616	3.94271	2.31314	3.04734
EVM0027146	2.74471	2.90524	3.12263	2.92419	2.73867	1.88008	2.36409	2.32762	6.08657	4.59315	4.59001	5.08991	5.20746	4.65945	3.84362	4.57018	4.98834	4.50999	7.50047	5.66627	7.60102	7.00922	8.05387	7.5547	4.8031	4.1092	4.67238	4.52823	7.74155	6.82411	10.1135	8.2264	8.46367	8.2269	9.13518	8.60858	8.15971	8.14768	9.00763	8.43834
EVM0052720	0.304285	0.290572	0.363786	0.319548	0.152572	0.150143	0.26862	0.190445	0.177655	0.160397	0.381406	0.239819	0.286326	0.297917	0.389308	0.324517	0.439152	0.394678	0.344059	0.39263	0.113014	0.127952	0.091831	0.110932	0.027965	0.052911	0.127146	0.0693407	0.111464	0.046564	0.080924	0.0796507	0.017064	0.073017	0.02628	0.038787	0.028456	0.089913	0.078913	0.0657607
EVM0027149	1.8737	1.27699	1.77389	1.64152	1.01316	0.655017	1.00949	0.892556	1.11157	1.025	0.98232	1.03963	1.22485	1.27355	1.62774	1.37538	2.19914	1.92136	1.85949	1.99333	2.4621	2.4941	2.26334	2.40652	1.47319	1.34786	1.33197	1.38434	2.29231	2.20852	2.0324	2.17774	2.18581	2.31465	2.26643	2.25563	2.60121	2.16148	2.71416	2.49228
EVM0051727	0.840294	1.7049	1.66143	1.40221	0.803562	0.820067	0.508537	0.710722	0.333491	0.457069	0.72561	0.50539	0.392783	0.389694	0.169524	0.317334	0.391643	0.322838	0.519177	0.411219	1.04865	0.977097	1.01031	1.01202	0.603848	0.322178	0.433617	0.453214	0.369938	0.189914	0.060431	0.206761	0.220977	0.22797	0.103438	0.184128	0.308547	0.290501	0.107301	0.23545
EVM0052728	52.6197	49.556	52.1087	51.4282	23.5239	23.2231	21.1004	22.6158	16.543	16.2015	17.4658	16.7368	13.5781	15.2259	12.5025	13.7688	27.8987	28.228	31.2765	29.1344	100.209	96.0121	106.077	100.766	65.1533	57.3956	59.3149	60.6213	64.0615	65.2168	63.6032	64.2938	41.0868	38.6515	43.4268	41.055	37.8827	41.1666	41.9915	40.347
EVM0052729	10.322	13.3709	9.93742	11.2101	9.30199	9.36272	9.88193	9.51555	6.34249	7.33365	7.6586	7.11158	7.30591	7.62833	7.3656	7.43328	6.04004	9.02499	8.41303	7.82602	3.56564	2.74057	3.40966	3.23862	3.84583	3.91817	3.51937	3.76112	3.86685	3.47337	2.92566	3.42196	4.55712	4.54779	3.08596	4.06362	3.33411	3.30394	3.25827	3.29878
EVM0016715	27.6326	27.3139	29.1648	28.0371	32.1606	30.3183	32.9945	31.8245	23.2256	26.308	22.7369	24.0902	12.0208	13.7384	12.1638	12.641	14.0488	15.4776	14.6603	14.7289	24.7854	28.5848	25.5616	26.3106	33.7788	33.5019	31.0174	32.766	31.2019	28.5194	28.7469	29.4894	16.3592	18.6188	17.2584	17.4121	17.5664	15.8944	16.2883	16.583
EVM0016714	114.312	122.454	116.828	117.865	99.5134	104.022	96.8752	100.137	75.0881	77.7219	76.8068	76.5389	45.9692	46.7008	47.6151	46.7617	51.652	51.9918	52.8489	52.1642	107.173	108.446	108.875	108.164	52.3544	55.9625	57.8668	55.3945	44.0617	45.1165	47.2644	45.4809	28.9708	32.6433	30.5072	30.7071	31.9918	33.589	33.1774	32.9194
EVM0053788	6.84434	6.12649	7.03861	6.66981	4.86653	5.23185	5.20565	5.10134	4.21079	3.90338	4.22697	4.11371	2.99424	2.45881	2.32889	2.59398	4.10033	4.46285	3.43097	3.99805	6.74094	6.36108	5.87324	6.32509	3.25213	3.44537	3.01861	3.2387	3.83441	4.36586	4.04468	4.08165	2.5594	2.66196	2.55129	2.59089	3.11682	3.44995	3.20964	3.2588
EVM0016719	5.2993	5.46109	5.77675	5.51238	5.36599	5.01589	5.40609	5.26266	4.72166	5.76135	4.89485	5.12596	5.24693	5.69133	4.24634	5.06153	6.0485	8.63266	6.90287	7.19468	1.59284	1.67541	2.42732	1.89852	4.79243	6.40807	5.28625	5.49558	7.45254	9.11663	8.21	8.25972	2.19298	2.0856	1.49234	1.92364	1.24142	1.0403	1.69981	1.32718
EVM0016718	4.47866	2.79682	3.16104	3.47884	2.04198	1.97482	2.0515	2.02277	0.960251	1.14674	0.801422	0.96947	0.605952	0.068581	0.904606	0.52638	1.48218	1.78781	1.44613	1.57204	1.68331	1.21774	1.17607	1.35904	1.29903	1.01515	1.71197	1.34205	0.799636	0.870519	1.1764	0.948852	0.679679	0.26011	0.290831	0.410207	1.45669	0.646638	0.943056	1.01546
EVM0026816	31.0048	29.0954	30.1891	30.0964	41.9542	39.6791	36.4597	39.3644	39.4741	40.6155	39.4071	39.8322	75.9952	77.1232	68.8845	74.001	113.384	117.644	123.716	118.248	80.3988	92.2258	91.5812	88.0686	43.5683	41.1473	41.7982	42.1713	62.8049	59.1758	63.1292	61.7033	91.4094	81.049	89.2682	87.2422	101.89	105.63	99.083	102.201
EVM0026815	2.50304	1.17945	1.91845	1.86698	1.33575	0.573321	0.702634	0.870567	1.49742	3.07825	1.36946	1.98171	2.54029	2.97512	2.86069	2.79203	3.90596	5.08651	6.62434	5.2056	5.42984	7.34994	6.40084	6.39354	1.22242	0.65197	0.839174	0.904523	2.55854	2.67616	3.3747	2.8698	3.96788	4.6754	4.30747	4.31692	4.89821	5.27886	3.81441	4.66383
EVM0026814	91.8828	87.0022	93.3362	90.7404	81.8533	80.9071	77.3482	80.0362	49.4079	48.6224	49.7991	49.2765	90.9944	92.9647	96.6534	93.5375	107.883	95.6313	96.1996	99.9046	68.2492	69.3606	66.8589	68.1562	63.3163	61.6873	64.8424	63.282	44.8737	44.6062	47.1239	45.5346	88.8105	96.6666	87.4476	90.9749	67.3746	66.1441	66.4396	66.6528
EVM0047203	2.05471	1.76688	2.21732	2.01297	3.10916	3.17645	3.27004	3.18522	1.37732	1.6839	1.38638	1.48253	1.79653	1.84015	1.75054	1.79574	2.88462	2.50486	2.35276	2.58074	4.3135	3.78462	3.97488	4.02434	4.32663	4.30824	4.57598	4.40362	4.45811	5.24368	4.34884	4.68354	6.14591	5.77379	5.0044	5.64136	5.22208	6.19849	5.43649	5.61902
EVM0047200	1.65941	2.44052	1.58941	1.89645	1.85576	0.987635	1.64005	1.49448	2.18763	2.66213	1.95738	2.26905	2.13874	1.89181	1.8181	1.94955	1.43323	1.10834	1.17861	1.24006	1.66738	2.41783	2.09368	2.05963	0.957539	2.09618	1.79264	1.61546	3.52466	4.02328	3.54712	3.69835	1.76309	2.18779	2.18455	2.04514	2.51387	2.06312	2.19044	2.25581
EVM0001914	7.04743	5.79151	5.67172	6.17022	3.87999	5.97456	4.78127	4.8786	10.8801	11.4711	11.4812	11.2775	5.89503	5.74455	6.6634	6.10099	6.63239	6.79335	5.75847	6.39474	4.58582	5.21652	4.8112	4.87118	2.91173	4.02985	4.07428	3.67195	10.3175	10.2739	11.2928	10.6281	3.21382	4.20879	3.42542	3.61601	4.45298	4.84233	4.26881	4.52137
EVM0046158	1.83069	2.78367	1.99707	2.20381	0.854663	1.01574	0.507194	0.792531	0.844229	1.14464	1.495	1.16129	1.86608	3.87516	2.31659	2.68595	2.73586	2.02849	3.98839	2.91758	1.89786	1.46855	2.04729	1.80457	0.35016	0.413953	0.344907	0.369673	0.856067	1.04465	0.552366	0.817695	0.988151	0.732504	1.76115	1.1606	0.771151	1.24166	1.2042	1.07234
EVM0001910	1.31844	0.990496	1.76632	1.35842	1.42873	1.34321	0.697694	1.15654	1.41746	0.981716	1.11288	1.17069	0.478133	0.196888	0.473183	0.382735	0.399857	0.293716	0.759066	0.484213	5.0851	4.08582	4.34432	4.50508	0.78185	0.855644	0.838522	0.825339	1.92207	2.30111	2.05279	2.09199	0.733956	0.923995	0.645509	0.76782	0.741284	1.24676	1.33748	1.10851
EVM0001912	0.554728	0.356059	0.239622	0.38347	1.36387	2.51258	1.54253	1.80633	0.34882	0.146829	0.341026	0.278892	0.37865	0.681199	0.31093	0.456926	0.742613	0.734301	0.733344	0.736753	0.864607	0.90888	0.849547	0.874345	0.971925	0.802058	0.891052	0.888345	1.028	0.879747	0.6645	0.857416	1.94399	1.72631	1.07478	1.5817	1.40964	1.13412	0.911849	1.15187
EVM0046154	3.66084	3.5722	3.77208	3.66837	3.39316	3.38902	2.95449	3.24555	1.24548	1.64362	1.53081	1.4733	1.07043	0.856067	1.01809	0.981529	1.64649	2.8006	2.24549	2.23086	3.06664	3.34779	3.3896	3.26801	2.95363	2.36851	1.91577	2.41264	1.61419	1.79285	1.28686	1.56464	0.69708	0.562403	0.74553	0.668338	0.693241	0.967802	0.85757	0.839538
EVM0046155	0.499045	0.811877	0.179919	0.496947	0.460298	0.948958	0.067238	0.492165	0.343664	0.247909	0.428843	0.340139	0.372321	0.770827	0.54011	0.561086	0.581423	0.367477	0.609273	0.519391	0.704725	1.80149	1.36198	1.2894	0.201101	0.510849	0.297852	0.336601	0	0.296627	0.3321	0.209576	0.924679	0.813682	0.505941	0.748101	1.77156	1.41302	1.40263	1.52907
EVM0046156	4.86201	5.21574	5.39658	5.15811	4.04862	3.13713	3.14449	3.44341	2.63084	3.37987	2.87709	2.9626	1.23834	1.51445	1.76463	1.50581	1.88377	1.70569	2.15254	1.914	3.12806	3.20906	3.08294	3.14002	2.44936	3.1068	2.60944	2.72186	2.27778	2.36451	2.3844	2.34223	1.21278	1.37523	1.63028	1.4061	1.14105	1.63736	1.19928	1.3259
EVM0046152	0.127713	0.114359	0.044406	0.0954927	0.144845	0.021487	0.065787	0.077373	0.017872	0.12253	0.021281	0.0538943	0.127566	0.143242	0	0.0902693	0.142094	0.079467	0.101386	0.107649	0.502353	0.488448	0.763157	0.584653	0.567205	0.581428	0.561027	0.569887	0.908318	0.669338	0.448226	0.675294	1.20106	1.12703	1.14322	1.15711	0.784099	1.15339	0.927239	0.954908
EVM0027495	12.9109	12.8554	13.509	13.0918	10.0621	9.5439	9.81589	9.8073	15.2586	14.3403	13.3876	14.3288	13.1321	14.0616	14.1492	13.781	18.887	19.0225	17.7636	18.5577	17.3752	18.1251	16.2588	17.253	9.41214	10.2323	9.04139	9.56193	18.2117	18.95	17.1889	18.1169	18.4546	18.7625	17.671	18.296	18.6732	19.4738	20.6542	19.6004
EVM0027491	1.83462	2.11638	2.19662	2.04921	2.43961	2.95961	2.66185	2.68702	2.39834	2.79699	2.56358	2.5863	1.66777	1.92982	2.19346	1.93035	2.70283	2.5765	1.82867	2.36933	1.77567	1.35306	2.15552	1.76142	1.63123	1.47154	1.32444	1.47574	2.77082	3.40993	3.48068	3.22048	2.17146	1.53631	2.25317	1.98698	1.98359	2.55321	2.23371	2.25684
EVM0027493	1.18163	1.84433	1.67728	1.56775	2.00639	1.87893	2.06627	1.98387	0.345851	0.894758	0.664091	0.6349	0.84633	0.440292	0.567486	0.618036	0.553606	0.513438	0.784335	0.617126	0.680916	1.04784	1.54337	1.09071	0.686565	0.144874	0.574489	0.468643	0.356733	0.076253	0.261729	0.231572	0.068817	0.309366	0.114327	0.16417	0.214857	0.256256	0.18642	0.219178
Salix_babylonica_newGene_9890	10.6659	10.9289	10.4426	10.6791	5.51492	5.70152	5.31496	5.51047	6.23025	5.9728	5.92575	6.04293	1.6917	2.47948	2.58234	2.25117	3.39027	3.16946	4.34773	3.63582	2.3167	3.70805	2.01316	2.67931	1.04766	1.30354	1.27186	1.20769	0.581406	0.858276	0.8866	0.775427	1.37854	0.677889	0.573698	0.876707	0.74192	0.557902	1.00788	0.769236
Salix_babylonica_newGene_9892	4.75813	5.34589	4.02414	4.70938	1.55452	3.42148	3.16165	2.71255	1.5312	1.23992	0.555531	1.10888	2.15276	3.46855	2.28186	2.63439	3.3434	2.72333	3.27049	3.1124	4.39996	3.47693	3.44957	3.77549	4.13756	2.77859	3.91476	3.6103	2.04385	1.02018	1.42825	1.49743	3.51748	3.7914	4.15321	3.8207	6.37649	5.6159	4.6398	5.54406
Salix_babylonica_newGene_9893	1.0068	1.04466	1.09756	1.04968	0.838704	1.18531	0.822516	0.948843	0.93342	0.72965	1.09095	0.918008	2.06517	2.02595	2.08114	2.05742	1.29016	1.30337	1.2311	1.27488	0.319165	0.390876	0.30857	0.339537	0.604962	0.354666	0.147696	0.369108	0.355208	0.288248	0.411669	0.351708	0.320737	0.601907	0.422417	0.448354	0.725792	0.480502	0.485424	0.563906
EVM0027498	2.61432	2.74561	2.10635	2.48876	1.16734	1.14763	1.12473	1.14657	1.30533	1.52463	1.35207	1.39401	1.1498	1.09361	0.754726	0.99938	0.601314	0.715458	0.724679	0.680484	2.76129	3.15353	3.06573	2.99352	1.8675	1.77945	1.91245	1.85313	1.58196	2.04455	2.23459	1.9537	1.3111	1.19356	1.20697	1.23721	1.00348	1.14143	1.50823	1.21772
EVM0027499	1.29968	0.734175	0.647672	0.893844	1.33352	1.83907	1.26572	1.47944	2.25304	1.85336	1.84679	1.98439	1.70808	0.925611	1.27895	1.30421	1.31393	1.25048	2.01221	1.52554	0.911873	1.07274	1.15057	1.04506	1.34248	1.78142	1.46072	1.52821	1.98874	0.954899	1.41772	1.45378	0.603791	0.831802	0.300063	0.578552	0.947723	0.870106	0.568292	0.795374
Salix_babylonica_newGene_9896	3.50297	6.39287	3.73856	4.5448	2.15587	1.04807	1.79447	1.66614	4.49851	3.96727	5.29759	4.58779	3.317	3.00355	3.42525	3.2486	1.20283	2.48063	1.70432	1.79593	5.2806	4.6616	0	3.31407	0	0	21.8753	7.29176	7.10445	8.2706	8.42144	7.93216	9.77679	0	6.42327	5.40002	0	4.56938	0	1.52313
Salix_babylonica_newGene_9897	0.687591	2.42628	1.45237	1.52208	1.563	0.657693	1.54858	1.25642	1.38511	1.08824	1.93176	1.46837	1.53543	1.57805	1.65901	1.59083	1.90507	1.34481	1.8597	1.70319	3.24004	2.39514	2.12164	2.58561	0.807569	1.34493	1.57137	1.24129	2.12872	1.22428	1.00823	1.45375	1.91684	1.95541	2.7413	2.20452	3.00592	2.11161	3.5165	2.87801
Salix_babylonica_newGene_4917	1.10637	1.58534	0.817206	1.16964	0.402291	0.21097	0.545869	0.386377	0.444013	0.49531	0.26412	0.401148	0.38896	0.633637	0.279686	0.434094	0.280351	0.122274	0.51382	0.305482	1.00249	0.589863	0.555155	0.715838	0.627266	0.592168	0.756047	0.658494	1.08986	0.574859	0.956093	0.873605	0.622055	0.745137	0.567441	0.644878	0.752224	0.650519	0.86185	0.754864
Salix_babylonica_newGene_4913	0.4585	0.511227	0.327868	0.432532	0.643456	0.674519	0.781399	0.699791	1.21415	0.444703	1.02307	0.893972	0.376948	0.315634	0.848595	0.513726	0.621875	0.440512	0.890246	0.650878	0.587214	0.414334	0.33633	0.445959	0.779714	0.89016	0.494973	0.721616	0.865335	0.991874	0.624675	0.827295	0.425394	0.739736	0.377692	0.514274	0.347292	0.318656	0.275007	0.313652
EVM0057776	0.198659	0.407043	0.451473	0.352392	0.664096	0.321959	0.540479	0.508845	0.223009	0.643466	0.237829	0.368101	1.05152	1.05692	0.311216	0.806553	1.35983	1.22816	0.916876	1.16829	0.56755	1.17377	1.30592	1.01575	0.919338	0.788909	1.03066	0.912968	1.1912	1.37885	1.96895	1.513	3.30076	2.21326	1.54188	2.35197	2.16093	1.5006	2.02526	1.8956
EVM0057777	10.6422	9.04722	7.77513	9.15486	8.11743	8.4409	8.19006	8.24947	14.2434	10.6698	14.0506	12.9879	18.4564	18.9823	18.095	18.5112	15.9457	16.3653	14.8417	15.7176	7.21568	7.29096	7.27318	7.25994	3.97483	5.33795	5.45399	4.92225	9.04796	8.05046	7.9506	8.34967	8.76337	7.77955	10.213	8.91866	8.7013	9.30258	9.66945	9.22444
EVM0057772	5.75305	5.46031	6.35415	5.85584	3.63953	3.52626	3.77349	3.64643	3.61543	3.54262	3.80925	3.65577	4.05627	3.84416	3.86421	3.92155	5.0587	6.88963	3.77234	5.24022	7.6348	7.92388	8.69498	8.08455	5.67051	4.78235	5.05701	5.16996	2.6662	4.62102	3.67824	3.65515	4.00996	5.12102	4.51364	4.54821	5.7058	6.21023	6.26746	6.06116
EVM0057773	0.496215	0.704735	0.580929	0.59396	0.302391	0.620428	0.449535	0.457451	0.306076	0.490229	0.329467	0.375257	0.42528	0.345234	0.394653	0.388389	0.558487	1.13778	0.650249	0.782173	5.13273	6.6849	6.38403	6.06722	6.59643	4.7213	5.03994	5.45255	4.99328	4.66554	4.3197	4.65951	4.8754	4.15808	3.62515	4.21954	3.41842	5.09011	3.62591	4.04481
EVM0057770	0.964195	0.531018	0.811547	0.76892	2.86076	3.02024	3.00609	2.96236	3.63714	2.69894	3.17179	3.16929	1.45017	2.14703	1.74322	1.78014	1.45566	1.50688	1.13738	1.36664	0.788118	0.761931	1.0412	0.863748	1.17841	1.21186	1.68249	1.35759	1.78895	1.69019	2.05609	1.84508	1.03925	1.09326	2.19509	1.44253	1.60001	0.969297	0.860737	1.14335
EVM0057771	2.79043	2.40733	1.75533	2.3177	4.48363	4.49162	4.50984	4.49503	1.48676	0.842911	1.15145	1.16038	0.805202	0.520879	1.34565	0.890576	0.922588	0.830157	0.598833	0.783859	1.51622	1.81924	1.68151	1.67232	11.8661	11.1417	10.5486	11.1855	4.07278	5.11484	4.86191	4.68318	7.18262	5.82091	6.30417	6.4359	4.7995	6.12376	5.29221	5.40516
EVM0057778	3.65175	3.21246	3.11716	3.32712	3.37455	4.72569	3.77376	3.958	4.36742	3.92461	3.72133	4.00445	4.00942	4.56517	3.6194	4.06466	2.86764	3.99867	4.87356	3.91329	4.85466	6.70782	5.10896	5.55715	7.38422	7.73776	7.02729	7.38309	9.42053	8.27852	9.47551	9.05819	9.19598	10.1954	9.44263	9.61134	7.2946	10.2216	7.7064	8.40752
EVM0057779	4.21682	3.96102	4.26457	4.14747	4.7443	5.1565	5.45255	5.11778	5.53596	5.49776	5.14056	5.39142	1.81602	2.6634	2.58025	2.35322	3.29186	2.90621	2.95218	3.05008	5.51174	5.10152	5.06731	5.22686	7.4113	7.02444	7.48448	7.30674	8.93134	9.15455	8.31401	8.79997	2.69131	2.97871	4.14754	3.27252	3.99743	4.66693	4.02373	4.22936
EVM0017044	4.85831	5.08579	3.42785	4.45732	1.90898	1.93913	1.41086	1.75299	1.81152	2.00312	1.29465	1.7031	3.2198	2.90662	3.05411	3.06018	3.77289	3.65597	4.51804	3.9823	16.5458	17.4007	16.917	16.9545	12.0139	14.3372	13.8547	13.4019	12.3187	11.9001	12.1315	12.1167	14.2681	15.2182	14.6199	14.7021	11.0965	13.763	11.4569	12.1055
EVM0013746	4.84055	6.56635	6.35633	5.92108	4.16183	4.46394	3.5426	4.05612	2.46574	3.03749	2.91113	2.80479	1.01992	1.09842	0.972315	1.03022	1.72903	2.20197	0.897302	1.60943	4.02124	2.89469	2.20526	3.0404	1.53598	1.87451	1.69456	1.70168	0.700775	0.045319	0.48643	0.410841	0.573682	0.441904	0.846265	0.620617	0.412466	0.537693	0.945713	0.631957
EVM0017047	2.95527	3.66423	3.04406	3.22119	2.37223	2.5886	1.58852	2.18312	1.32301	1.35987	1.78145	1.48811	1.20995	1.06536	0.749837	1.00838	1.59198	0.908586	1.8127	1.43775	4.31366	3.41099	2.42538	3.38334	2.69418	2.19344	1.65003	2.17921	1.69816	2.12779	2.2382	2.02138	0.890389	1.1916	0.804959	0.962316	1.72513	1.11409	1.27601	1.37175
EVM0013743	1.27601	1.42245	1.53223	1.41023	0.421023	0.735216	0.804269	0.653503	0.665385	0.756694	0.844368	0.755482	0.600113	0.562013	0.646188	0.602771	0.516943	0.266725	0.732094	0.505254	0.974442	0.848844	0.82385	0.882379	0.689982	0.597618	0.495521	0.594374	0	0.044916	0.25159	0.0988353	0.082974	0.073271	0.09571	0.083985	0.477773	0.267065	0.394021	0.37962
EVM0013741	0.069834	0	0.356785	0.142206	0.339691	0	0.227962	0.189218	0.290974	0.386977	0.814973	0.497641	0	0	0.19996	0.0666533	0.268044	0	0.122178	0.130074	1.00786	1.02031	0.519611	0.849258	0.442835	1.07737	1.14166	0.887288	2.17258	2.12034	2.08881	2.12724	1.25256	1.40558	1.19828	1.28547	0.643502	0.952138	1.02992	0.875185
EVM0017048	5.03962	4.96404	3.79677	4.60014	3.2828	2.93875	3.43869	3.22008	2.77876	3.31937	4.09115	3.39643	2.42904	2.46527	2.42436	2.43955	2.63064	2.88818	3.03803	2.85228	10.2901	10.4593	10.5673	10.4389	6.12916	5.03225	5.77063	5.64401	5.10219	5.10135	5.34097	5.1815	1.46909	1.79668	1.74531	1.67036	3.17159	1.97692	2.70707	2.61853
EVM0017049	1.98034	1.53631	2.53738	2.01801	0.519217	0.370105	0.243026	0.377449	0.569512	0.980317	0.731774	0.760534	0.566135	0.677307	0.591101	0.611514	0.197575	0.108287	0.325198	0.210353	0.338282	0.3227	0.235554	0.298845	0.72846	0.668428	0.806819	0.734569	0.282088	0.065652	0.23286	0.193533	0.059434	0.181965	0.167994	0.136464	0.14862	0.128416	0.179109	0.152048
EVM0013748	1.26567	1.12828	1.02743	1.14046	1.52194	1.1141	1.44942	1.36182	1.88234	1.65436	1.33393	1.62354	1.05287	0.5126	0.711256	0.758908	0.958363	0.97614	0.567175	0.833893	0.605638	0.590032	0.726347	0.640672	0.557188	0.492951	0.511589	0.520576	1.5133	1.47668	0.974876	1.32162	0.435955	0.455963	0.345815	0.412578	0.345932	0.542148	0.480924	0.456335
EVM0055738	0.136122	0	0.134431	0.0901843	0.319728	0.309722	0.324108	0.317853	0.188052	0.360916	0.338201	0.295723	0.054127	0.080588	0.109745	0.0814867	0.175137	0.163774	0.164064	0.167658	0.832367	1.05175	1.12725	1.00379	7.4879	9.91037	8.7599	8.71939	3.36885	2.64086	3.11259	3.04077	3.23739	3.92528	4.63608	3.93292	2.8729	2.61273	2.35822	2.61462
EVM0010215	2.28622	1.51416	1.89254	1.89764	1.69766	1.49518	2.31218	1.83501	1.34722	1.81853	1.90346	1.68973	2.19731	1.82094	2.15854	2.05893	2.52091	1.75268	2.47266	2.24875	3.9002	5.27661	3.95893	4.37858	4.34547	4.14952	4.92698	4.47399	5.71368	4.58622	4.91226	5.07072	4.17247	3.6604	4.39901	4.0773	4.77576	3.97499	5.05577	4.60217
EVM0010217	3.90014	4.68547	3.49141	4.02567	3.64002	3.42098	3.96695	3.67598	3.97475	3.83552	4.18955	3.99994	5.24389	5.00664	4.60908	4.9532	4.83659	5.80361	4.21881	4.953	2.49872	2.12044	2.18554	2.26823	1.76594	2.35688	2.15427	2.09237	2.32367	2.43405	2.45378	2.40384	2.53243	2.25152	2.31599	2.36665	2.30453	2.98923	3.25486	2.84954
EVM0010211	0.478511	0	0.41682	0.298444	0	0.102387	0.313976	0.138788	1.21546	0.953272	1.65463	1.27445	0.622972	0.799162	0.499339	0.640491	0.891846	0.799948	0.709821	0.800538	1.17894	1.33545	1.54246	1.35228	0.519671	0.200894	0.812636	0.511067	1.7493	1.74669	1.66403	1.72001	0.975108	1.15475	1.1624	1.09742	1.33761	1.65031	0.757459	1.24846
EVM0055731	10.4587	8.52032	9.45925	9.47943	9.06681	9.76967	9.15547	9.33065	10.8603	11.0645	10.6922	10.8723	4.43469	3.45935	4.62379	4.17261	4.3132	3.99366	3.53816	3.94834	5.68493	6.68881	6.3444	6.23938	6.12585	7.15791	7.24711	6.84363	10.1393	9.36217	9.95919	9.82023	4.0066	3.4204	4.58153	4.00284	3.17865	3.25504	3.17934	3.20434
EVM0055733	22.3698	20.1575	19.5338	20.687	18.9656	18.5761	16.0435	17.8617	13.609	11.5814	12.2787	12.4897	11.6351	10.8091	10.9498	11.1313	14.3082	15.5203	14.2777	14.7021	18.6701	17.9177	18.4991	18.3623	26.5679	26.3888	27.7657	26.9075	36.2317	36.6369	34.2615	35.71	23.6972	23.3984	23.1843	23.4266	29.9093	28.7027	32.2407	30.2842
EVM0010219	1.74506	2.50572	2.24215	2.16431	1.43341	1.7815	1.7601	1.65834	2.43282	3.06275	1.74766	2.41441	3.29459	3.99557	3.19594	3.49537	2.9842	4.87804	3.21376	3.692	3.08731	2.01308	2.74131	2.6139	0.765587	1.34168	0.857814	0.988359	2.05076	2.75322	1.84695	2.21698	1.92441	3.26825	3.33871	2.84379	3.21259	2.26496	3.62086	3.03281
EVM0042107	0.121174	0.136928	0.286324	0.181475	0.118475	0.30282	0.36717	0.262822	0.993551	0.538385	0.521926	0.684621	1.93978	1.63085	2.14588	1.9055	1.09137	1.34827	1.20944	1.21636	0.495714	0.8202	0.435701	0.583872	0.487431	0.475867	0.586871	0.516723	1.49073	1.39467	1.40104	1.42881	2.08838	2.21787	2.59314	2.2998	1.88659	1.88228	2.22468	1.99785
EVM0042106	1.21046	1.51227	1.18331	1.30201	1.81024	2.10662	1.72914	1.882	0.34626	0.34388	0.546084	0.412075	3.00326	2.76604	2.66789	2.8124	1.87251	1.90205	2.16326	1.97927	0.730078	0.542626	0.3103	0.527668	1.29809	1.23448	1.1786	1.23706	0.1401	0.259133	0.11561	0.171614	2.24867	1.68117	1.57275	1.8342	1.24847	1.5241	1.34942	1.374
EVM0026361	8.99936	10.6021	9.16692	9.58945	10.6483	9.80967	10.1878	10.2153	4.36317	3.42651	3.22497	3.67155	5.41955	5.04345	4.35841	4.94047	2.25285	1.98143	2.17154	2.13527	3.13697	2.52676	3.37368	3.01247	5.93789	4.64539	4.80579	5.12969	3.76654	3.58769	4.79471	4.04965	6.66856	4.53258	4.82766	5.34293	2.76483	3.05903	2.72481	2.84956
EVM0042104	0.044736	0	0	0.014912	0.187936	0.481096	0.281743	0.316925	1.22511	0.48434	1.33652	1.01532	1.20879	0.699051	0.974672	0.960838	0.714172	0.567795	0.766856	0.682941	0.643555	0.82592	0.467242	0.645572	0.724948	1.18674	0.889048	0.933579	4.87397	3.52993	3.86421	4.08937	3.41192	2.80758	3.70877	3.30942	3.11257	3.11751	3.35331	3.19446
Salix_babylonica_newGene_8419	0.915463	1.88807	2.71695	1.84016	2.45652	2.73048	1.73186	2.30629	1.05957	5.84671	2.12776	3.01134	4.34322	4.74845	3.74778	4.27982	2.17066	2.77568	1.69165	2.21267	6.16917	7.75669	8.75734	7.56107	17.7686	14.3705	12.2135	14.7842	6.24272	4.11623	5.15114	5.17003	8.20536	9.84691	5.88892	7.9804	7.69112	7.49752	6.92633	7.37165
Salix_babylonica_newGene_8418	0	0	0	0	0	0	0	0	0	0	0	0	0	0	0	0	0	0	0	0	1.35804	1.42046	1.3939	1.3908	7.60787	8.68396	8.04068	8.11083	1.433	1.13165	1.96193	1.50886	2.45293	3.37027	2.54761	2.79027	2.67343	2.52641	2.5116	2.57048
Salix_babylonica_newGene_8412	1.29794	2.7378	1.23263	1.75612	0.341389	0.897071	0.62627	0.621577	2.95657	2.17409	1.49433	2.20833	3.92877	3.39121	3.63101	3.65033	2.95209	2.59167	2.3177	2.62049	0.041835	0.213635	0.072151	0.109207	0.430767	0.689511	0	0.373426	0.411701	0.1237	0.342843	0.292748	4.59673	2.42558	2.82325	3.28185	1.58063	1.45882	1.95763	1.66569
Salix_babylonica_newGene_8411	0.334325	0.888752	1.06386	0.762313	0.38739	0.774695	0.943475	0.701853	0.960807	0.635554	0.554184	0.716848	0.827582	1.52224	0.680254	1.01002	0.594691	0.252146	0.651549	0.499462	0.297747	0.311621	0	0.203123	0.354481	0.174937	0.177077	0.235498	0.088018	0.169191	0.485282	0.247497	0.309307	0.328718	0.134921	0.257649	0.50849	0.159764	0.484135	0.38413
Salix_babylonica_newGene_8415	0.098082	0.105505	0.063777	0.0891213	0.133759	0	0	0.0445863	0	0	0	0	0.062229	0.03097	0	0.0310663	0	0.086583	0	0.028861	0.525173	0.487179	0.882389	0.63158	1.67511	1.191	1.81639	1.56083	0.740677	0.46114	0.733681	0.645166	0.614559	1.36711	0.897363	0.959678	1.07281	1.16893	0.675317	0.972351
EVM0009155	2.34851	2.02697	2.63109	2.33552	1.47157	1.9357	1.81559	1.74095	1.39041	1.19746	0.921943	1.16994	0.39618	0.304593	0.563707	0.421493	0.607507	0.497227	0.65318	0.585971	2.25604	2.18627	2.10275	2.18169	1.33867	1.41427	1.14414	1.29902	1.05489	1.30774	1.33164	1.23142	0.637429	0.82417	0.663132	0.708244	1.21974	0.987244	1.19023	1.13241
EVM0015990	135.3	138.374	139.693	137.789	12.3603	13.6196	10.3833	12.1211	18.1289	17.5474	18.6948	18.1237	107.686	110.042	104.151	107.293	87.6218	81.857	93.4641	87.6476	61.1116	60.3834	56.9474	59.4808	5.48492	4.50122	5.64871	5.21162	2.52043	3.44055	2.57991	2.84697	53.5814	51.7169	53.7521	53.0168	42.4826	43.8348	41.2789	42.5321
EVM0015992	148.67	150.943	138.084	145.899	90.7372	93.23	85.9536	89.9736	169.354	175.524	171.444	172.107	112.1	115.171	118.168	115.147	189.117	197.067	210.399	198.861	67.3655	70.7652	69.159	69.0965	28.0144	28.9226	28.0085	28.3152	35.8264	36.5282	40.9417	37.7654	63.0229	58.9166	61.5107	61.1501	63.6867	61.6574	62.8946	62.7462
EVM0015993	11.7987	9.5775	10.2275	10.5345	12.0362	10.8581	12.6766	11.857	7.72543	6.7991	6.90538	7.1433	1.88007	2.08001	1.64139	1.86716	3.43639	3.61663	3.07765	3.37689	11.1413	11.5584	10.8786	11.1928	9.53883	9.90448	9.62604	9.68979	8.56878	8.63959	8.42035	8.54291	2.24956	4.06805	4.17295	3.49685	5.01194	5.79981	4.69396	5.16857
EVM0015995	1.35726	1.46959	1.16776	1.33153	0.598236	0.318054	1.26303	0.726439	0.961909	0.615946	0.775861	0.784572	0.212618	0	0.368446	0.193688	0.317427	0.143317	0.116427	0.19239	1.2895	1.5037	1.07443	1.28921	1.14657	1.2387	0.933628	1.1063	0.917031	0.852577	0.927856	0.899155	0.038401	0.291455	0.215766	0.181874	0.339379	0.276012	0	0.20513
EVM0015997	12.0663	12.5333	14.504	13.0346	9.10058	13.3686	8.91915	10.4628	10.3459	9.70148	10.6663	10.2379	10.7452	10.7159	13.9325	11.7979	13.2825	15.6878	14.8293	14.5999	22.7245	24.4071	17.5759	21.5692	11.4869	14.4253	10.9629	12.2917	18.3062	17.5027	17.0825	17.6304	18.4545	17.6237	21.6569	19.245	28.4088	26.8686	21.4853	25.5876
EVM0015998	136.524	127.179	135.084	132.929	68.0364	61.9212	64.2144	64.724	58.7899	62.7055	59.947	60.4808	68.85	68.7627	66.1683	67.927	75.8199	78.3354	80.8574	78.3376	114.452	110.907	115.567	113.642	126.807	120.566	132.895	126.756	189.484	196.386	184.038	189.969	127.033	119.942	126.02	124.332	161.67	156.503	159.083	159.085
EVM0015999	1.0538	0.732299	2.42155	1.40255	1.24827	1.72167	1.55716	1.50903	4.95292	3.88846	6.10782	4.98307	4.91972	6.2354	6.37348	5.84287	6.90377	4.04978	7.23815	6.0639	2.83972	2.83063	2.87202	2.84746	1.04824	1.0316	1.36358	1.14781	5.78278	6.91802	7.68719	6.79599	6.40271	6.82264	6.69949	6.64161	7.39085	6.27986	7.23851	6.96974
EVM0042103	1.85346	2.30113	2.32895	2.16118	27.3409	29.2363	30.0113	28.8628	12.1644	12.6606	10.9078	11.911	18.6742	21.1893	16.1829	18.6822	11.1211	11.4161	12.1493	11.5622	0.500775	0.434812	1.01166	0.649083	20.2641	16.8737	19.7512	18.963	1.99097	1.96135	2.47859	2.14364	8.13612	8.24012	7.70658	8.02761	11.1781	10.7674	11.8989	11.2815
EVM0009154	3.2485	2.47319	2.86996	2.86388	4.42846	5.02807	3.63748	4.36467	3.80124	3.30979	3.70231	3.60445	3.06459	3.22678	3.68201	3.32446	3.29703	3.49996	2.90475	3.23391	2.06018	2.34255	1.96863	2.12378	5.16708	5.22706	5.22722	5.20712	3.63656	3.08264	3.58809	3.43576	3.30826	3.24544	4.31325	3.62232	3.35387	3.36262	3.93244	3.54964
EVM0053704	3.23225	4.12879	3.741	3.70068	2.31313	2.80678	3.09435	2.73808	7.69446	10.2122	9.37017	9.09228	5.44455	6.22044	7.23945	6.30148	6.17572	7.02181	6.71593	6.63782	2.56344	3.17665	2.17473	2.63827	3.23637	3.12762	2.75827	3.04075	7.94309	7.16074	7.77452	7.62612	3.26953	2.95458	3.93682	3.38697	5.33438	4.66096	3.91584	4.63706
EVM0007979	0.437602	0.479434	0.628956	0.515331	0.365667	0.490983	0.307581	0.388077	0.114382	0.275736	0.036343	0.142154	0.223518	0.15185	0.140396	0.171921	0.070519	0.386948	0.048045	0.168504	1.60401	1.1224	1.18636	1.30426	0.898036	1.24872	0.809944	0.985568	1.04798	0.671084	0.673425	0.797498	0.0882	0.420394	0.271807	0.260134	0.324542	0.457208	0.939114	0.573621
EVM0013932	7.40902	9.514	7.97161	8.29821	13.9039	18.8885	14.3682	15.7202	8.23563	8.99416	9.94612	9.05864	12.7853	11.1773	11.5008	11.8211	7.61208	5.66507	8.68697	7.32137	1.96794	2.17749	3.21039	2.45194	21.7569	24.4413	25.7749	23.991	17.7535	16.8196	17.3027	17.2919	44.7867	48.386	47.2932	46.822	40.3822	48.9939	42.0297	43.8019
EVM0017292	2.99371	3.59715	2.60224	3.06437	2.15413	1.68017	1.86403	1.89945	0.363855	0.91254	0.371597	0.549331	0.381945	0	0	0.127315	0.359498	0.131002	1.07846	0.522988	3.83319	3.82814	3.69315	3.78483	2.85263	4.42415	4.26366	3.84681	1.73396	1.35053	1.76098	1.61516	0.786358	1.13318	0.438356	0.785966	1.92881	2.03178	2.80058	2.25373
EVM0013934	4.39783	5.24454	4.10883	4.58373	9.14508	10.3855	10.6997	10.0768	10.6991	11.0891	12.5786	11.4556	11.9718	10.828	11.2071	11.3356	6.74613	6.93394	7.41775	7.03261	4.28495	3.5429	3.98291	3.93692	7.01417	7.14447	7.34609	7.16824	5.99809	5.15422	6.25298	5.80176	4.89078	4.348	5.24189	4.82689	5.49067	6.10849	5.15073	5.5833
EVM0041577	1.31822	1.06019	1.60575	1.32805	1.2848	0.84586	1.5362	1.22229	0.735076	0.937576	0.883824	0.852159	1.20766	1.17227	1.05197	1.14397	1.07085	1.26506	0.997536	1.11115	1.21287	1.19263	0.987842	1.13111	1.56011	1.09678	1.33297	1.32995	0.812229	1.78446	1.26025	1.28565	0.441764	0.897309	1.31764	0.885571	0.452388	0.354377	0.860551	0.555772
EVM0013935	0.25601	0.25087	0.15098	0.219287	0.562109	0.84712	0.781107	0.730112	1.16257	0.115133	0.668654	0.648784	0.149198	0.300616	0.107189	0.185668	0.055563	0.259429	0.198314	0.171102	0	0.059896	0.108688	0.0561947	2.19327	1.88636	2.37894	2.15285	0.339242	0.427971	0.809381	0.525531	0.280412	0.166034	0	0.148815	0	0.059012	0.119746	0.059586
EVM0047550	6.19291	6.4676	7.49672	6.71908	10.1741	10.3494	8.36399	9.62914	18.8402	17.5673	17.0403	17.8159	33.3769	30.8075	28.6726	30.9523	26.1129	28.9132	29.4236	28.1499	9.57843	7.53383	8.42295	8.51174	14.9941	15.1117	14.5801	14.8953	29.5034	29.6605	28.2452	29.1364	50.0818	51.2923	48.754	50.0427	44.9389	47.5261	47.1246	46.5299
EVM0033689	0.800718	1.42674	1.03265	1.0867	3.43161	3.1336	3.2487	3.2713	2.54374	2.13015	2.51553	2.39647	0	0.069381	2.34706	0.805479	0	1.42945	0.902583	0.777343	0	0	0.381179	0.12706	1.68027	1.34681	2.24093	1.75601	0	1.6817	0.895512	0.859071	1.98617	1.76637	1.71688	1.82314	1.21249	1.47534	1.36482	1.35088
Salix_babylonica_newGene_1436	17.0318	19.6847	15.1989	17.3051	31.9491	32.1909	28.0007	30.7136	25.8781	24.4359	27.2073	25.8404	26.5694	25.7167	24.8272	25.7044	14.9473	19.0005	18.8222	17.59	0.541331	0.961483	0.990617	0.831144	2.19533	2.86289	2.16455	2.40759	0.673456	0.497634	0.691538	0.620876	1.6274	0.77888	0.871423	1.09257	1.11875	0.758697	0.307521	0.728321
Salix_babylonica_newGene_5393	1.00562	0.564814	0.396817	0.655751	2.60734	3.49789	3.69471	3.26664	2.4573	2.53105	1.32051	2.10295	1.34612	1.67782	1.60774	1.5439	0.6811	1.1504	1.02071	0.950737	0.511057	0.574049	0.883923	0.656343	4.19184	2.77578	2.9115	3.29304	1.78536	2.39538	2.29018	2.15697	3.38155	3.68215	3.62216	3.56195	3.87323	4.091	3.90886	3.9577
Salix_babylonica_newGene_5392	0.540207	0.354025	0.334709	0.409647	0.4389	0.432894	0.765121	0.545638	0.454813	0.473824	1.53577	0.821468	0.463979	0.213017	0.202057	0.293018	0.418131	0.371994	0.654725	0.481617	1.41155	1.5018	1.37703	1.43013	0.959362	0.548408	1.11722	0.874995	1.37215	0.844073	1.45948	1.22523	0.848253	0.460348	0.145148	0.484583	0.526795	0.5865	1.10341	0.738903
EVM0014028	8.16531	8.15215	9.15502	8.49083	8.49364	9.48438	8.07763	8.68522	13.6652	11.2574	14.2066	13.043	17.0397	15.4159	15.065	15.8402	10.7129	8.37277	11.3818	10.1558	6.8248	6.93653	5.99452	6.58529	15.2959	16.2186	17.2923	16.2689	12.7507	13.3755	12.9245	13.0169	16.0157	16.9059	17.9612	16.961	15.322	18.666	18.1988	17.3956
EVM0038436	36.2352	31.6405	34.1851	34.0203	26.1141	24.5497	25.6991	25.4543	26.0921	27.1266	27.5783	26.9324	65.9575	65.0117	63.1486	64.706	58.5634	59.1464	57.5988	58.4362	27.6994	29.4964	29.1515	28.7824	18.0498	17.3339	20.9268	18.7702	21.1177	21.5832	19.7578	20.8196	44.6115	43.7556	44.977	44.4481	41.4301	42.1623	42.2299	41.9408
EVM0046688	0.540962	0.78659	0.796633	0.708062	2.60425	2.05515	2.03369	2.23103	1.41607	1.28351	1.81081	1.50346	0.938885	0.735571	1.00935	0.894603	0.549956	0.497477	0.397422	0.481618	0.763556	0.666814	0.663959	0.69811	1.90542	2.11314	2.43425	2.15094	1.53051	1.59679	1.46094	1.52941	0.821671	0.660096	0.672615	0.718127	0.705726	0.63104	0.599017	0.645261
EVM0015379	2.96682	3.26697	2.85949	3.03109	1.81694	1.9627	2.62641	2.13535	1.89793	1.80413	2.47177	2.05794	1.17623	0.719555	0.955016	0.950267	1.76268	1.67357	1.5489	1.66172	2.16186	2.27829	2.13779	2.19264	2.42219	2.08263	1.91678	2.14054	2.05546	1.66666	1.78993	1.83735	0.886182	1.22087	1.01956	1.04221	1.20906	1.21626	1.25776	1.22769
EVM0035604	1.82296	1.49824	2.02469	1.78196	3.44869	4.207	3.58583	3.74717	3.39364	4.7372	4.28344	4.13809	1.12011	1.45688	0.887106	1.1547	1.02226	1.054	1.13299	1.06975	2.04905	2.0302	2.52244	2.20057	4.57714	5.6685	6.50161	5.58241	4.61311	5.15048	4.47748	4.74702	1.45819	1.46313	1.79935	1.57356	2.06064	2.12253	1.75405	1.97907
EVM0035602	5.42268	6.02703	5.40247	5.61739	3.86936	3.14341	4.03996	3.68424	2.70866	2.17261	2.37423	2.4185	1.8413	1.46838	1.8996	1.73643	3.70569	2.82003	2.46232	2.99601	3.18573	3.55604	4.19614	3.64597	1.76348	1.72227	1.96759	1.81778	1.51329	1.35265	1.97051	1.61215	1.3476	1.41769	1.4705	1.41193	2.61454	2.34643	1.99759	2.31952
EVM0050812	100.338	100.958	99.8789	100.391	96.4071	96.4725	97.65	96.8432	100.028	97.1183	96.4482	97.8649	160.667	164.75	158.118	161.178	139.295	137.381	133.326	136.667	38.6585	48.3592	42.5783	43.1987	39.6067	41.2186	37.5842	39.4699	42.9659	39.3503	46.8676	43.0613	83.5977	84.0787	79.8285	82.5016	70.8121	68.7468	67.125	68.8946
EVM0049169	1.68921	1.79732	1.42107	1.63587	1.67537	1.38642	1.18281	1.41487	1.15867	1.25216	0.912329	1.10772	0.598997	0.63175	0.549018	0.593255	0.945082	0.49595	0.919515	0.786849	0.165751	0.310471	0.246088	0.24077	0.217636	0.366245	0.172012	0.251964	0.252334	0.213331	0.227769	0.231145	0.125671	0.086185	0.082041	0.0979657	0.177492	0.256631	0.185113	0.206412
EVM0038384	67.2985	66.808	69.6696	67.9254	28.0989	26.1575	25.1258	26.4607	29.6048	23.7672	29.4034	27.5918	19.2788	25.8645	22.1946	22.4459	54.4698	56.7497	60.4514	57.2236	8.77969	19.6923	16.9195	15.1305	15.8358	13.4049	16.6834	15.308	10.172	14.7816	16.9786	13.9774	14.446	15.9171	16.578	15.647	40.9315	32.8626	34.5886	36.1276
EVM0038386	1.56085	2.7957	2.76631	2.37429	2.61191	2.41464	3.10678	2.71111	1.99369	1.53096	2.61733	2.04733	1.19381	1.06875	0.772727	1.01176	0.999964	1.56387	0.524003	1.02928	0	0	0.017866	0.00595533	0	0.031979	0.084437	0.0388053	0	0	0	0	0	0.190041	0	0.063347	0	0.046561	0	0.0155203
EVM0038387	2.7338	2.54814	2.5913	2.62441	2.32487	2.02705	2.30528	2.21907	7.25637	5.1971	6.60954	6.35434	2.87702	2.38579	2.48908	2.58396	3.34442	4.09906	3.35112	3.5982	4.83377	4.81804	4.88483	4.84555	3.36685	3.21799	3.9119	3.49891	9.44299	10.4471	10.3625	10.0842	3.78769	4.03766	3.83628	3.88721	5.61346	5.49552	5.23615	5.44838
EVM0051237	14.0125	11.5896	13.4669	13.023	12.474	10.7109	9.22697	10.804	11.928	9.33674	10.6709	10.6452	5.46416	4.52524	4.51106	4.83349	7.1447	7.04288	6.63282	6.94013	10.0676	9.04354	9.63247	9.58122	14.9368	14.5629	13.3832	14.2943	15.7821	13.9383	15.0486	14.923	12.4475	10.3515	13.0708	11.9566	13.1006	12.5663	10.6344	12.1004
Salix_babylonica_newGene_5973	0.21025	0	0	0.0700833	0.331304	0	0.108352	0.146552	0.125497	0.172336	0	0.0992777	0.188381	0.092409	0	0.0935967	0	0	0.035206	0.0117353	1.55596	0.976776	1.04809	1.19361	6.83504	7.22058	7.27442	7.11001	4.34946	3.67638	5.29167	4.43917	3.34351	2.42484	2.45579	2.74138	4.50902	3.47431	4.09515	4.02616
Salix_babylonica_newGene_5972	0.921731	0.659461	0.73372	0.771637	0.2996	0.498645	0.515804	0.438016	0.509373	0.271064	0.539125	0.439854	0.454734	0.228034	0.587996	0.423588	0.805551	0.522962	0.594911	0.641141	0	0	0	0	0	0	0	0	0	0	0	0	0	0	0	0	0	0	0	0
EVM0024430	7.75728	7.93324	7.63904	7.77652	4.21425	3.57283	4.09135	3.95948	2.7782	2.54219	2.79693	2.70577	1.79032	2.22717	1.8508	1.95609	2.10851	1.77856	1.60632	1.83113	7.45766	6.57902	6.75649	6.93105	4.33305	3.14929	3.3639	3.61541	4.42208	4.03511	3.7157	4.05763	1.69462	1.86893	1.9957	1.85308	3.38881	3.46599	3.2834	3.3794
EVM0024434	13.4507	13.038	13.5092	13.3326	8.71976	6.90584	7.05843	7.56134	6.39443	5.35874	6.2378	5.99699	7.38156	6.78662	7.2587	7.14229	9.07931	9.20014	9.08098	9.12014	10.6593	8.98252	8.80753	9.48311	6.18539	5.00676	6.03211	5.74142	5.06288	5.25686	5.28799	5.20258	4.94904	4.71681	5.62085	5.09557	6.00632	5.85812	4.74935	5.53793
EVM0020328	6.13967	5.24917	5.16444	5.51776	4.82099	4.71636	4.90499	4.81412	6.66156	6.66776	8.69355	7.34095	6.63944	6.31253	7.41715	6.78971	6.91487	9.54265	6.80138	7.75297	2.81724	2.81396	2.94652	2.85924	2.25991	2.00019	1.83512	2.03174	3.23733	2.77227	3.36474	3.12478	4.18094	3.56254	3.47934	3.74094	3.66151	2.88755	2.70493	3.08466
EVM0054739	1.38091	1.40638	1.60064	1.46265	0.653472	0.738521	0.385166	0.592386	0.242248	0.205082	0.118946	0.188759	0.226897	0.075281	0.146033	0.149404	0.578675	0.552118	0.263215	0.464669	1.00599	1.10504	1.64048	1.2505	0.848906	1.17977	0.925513	0.984729	0.730624	0.68059	0.746706	0.719307	0.52352	0.28588	0.231683	0.347028	0.777228	0.66558	0.7231	0.721969
EVM0020323	18.0993	16.3056	18.4865	17.6305	20.643	19.5182	20.4455	20.2022	16.5216	17.4134	16.6664	16.8671	17.0249	18.2702	15.6374	16.9775	12.8927	13.4115	15.6145	13.9729	9.05634	7.56632	8.52081	8.38115	21.8089	23.5374	22.2756	22.5406	14.8366	13.491	13.9	14.0759	14.9186	13.9202	16.3958	15.0782	16.3222	15.723	14.8149	15.6201
EVM0020322	4.86582	5.93648	4.44394	5.08208	4.41319	4.33008	2.43003	3.72443	2.52411	2.21512	2.05166	2.26363	11.2241	9.32991	9.15078	9.9016	9.62621	9.41384	8.93525	9.3251	2.28222	1.7891	1.64752	1.90628	0.053699	0.01856	0.235472	0.102577	1.51187	2.32242	2.07449	1.96959	2.58301	2.32724	2.35994	2.4234	2.91133	3.10988	3.9061	3.3091
EVM0020321	5.85055	6.27522	6.00151	6.04243	3.70333	4.23013	3.61698	3.85015	2.41068	3.06294	2.32461	2.59941	1.76227	2.17093	1.98155	1.97158	3.92843	3.13296	2.60431	3.2219	3.76354	3.47408	3.70207	3.64656	3.60412	4.26827	3.90068	3.92436	3.1229	2.36693	2.38936	2.6264	2.85787	1.7392	3.00858	2.53522	1.7877	2.55248	3.18757	2.50925
EVM0020320	16.1552	15.6217	15.8893	15.8887	12.1163	12.8842	11.9122	12.3042	21.4754	19.5267	16.8439	19.282	23.3839	26.1533	20.9267	23.488	29.4208	30.2464	32.6658	30.7776	21.5683	21.7351	22.5494	21.9509	15.7693	14.1494	14.2259	14.7149	22.5948	19.7251	23.4004	21.9068	27.2036	23.8408	23.3391	24.7945	25.3805	26.8416	31.5112	27.9111
EVM0002722	0.65956	0	0	0.219853	0.097428	0	0.038119	0.0451823	0.27528	0.267123	1.02149	0.521297	0	0	0	0	0.495316	0.971808	0	0.489041	0	1.63517	0.618683	0.751283	1.00879	0.830785	1.01284	0.950805	1.21906	1.03745	0	0.75217	0.314157	0	1.06673	0.460296	0.58799	0	0	0.195997
EVM0023389	1.6643	0.951484	1.20601	1.27393	1.46582	1.53046	1.14932	1.38187	1.68325	2.00461	2.73291	2.14025	0.815077	1.01259	1.40736	1.07834	1.55447	1.20372	1.14633	1.30151	3.50102	3.30622	2.59349	3.13358	1.58173	1.97672	1.91132	1.82325	4.54345	3.39904	4.66051	4.201	4.03964	3.59945	2.93739	3.52549	4.40744	4.95863	4.3926	4.58622
EVM0056410	17.3665	18.9227	19.4063	18.5652	19.6333	19.962	16.1182	18.5712	11.8317	12.7947	13.7746	12.8003	8.8634	8.49412	7.35153	8.23635	12.331	11.8042	11.6336	11.9229	17.8363	16.9312	17.2808	17.3495	15.1938	14.5856	14.9057	14.895	11.6425	9.83303	9.83919	10.4382	4.26347	3.37353	4.35578	3.99759	4.38658	4.11314	4.69199	4.39724
EVM0056411	0.499814	0.622574	0.591512	0.5713	1.29333	2.11884	1.43993	1.61737	1.61905	1.81475	1.69405	1.70928	0.447195	0.258348	0.72872	0.478088	0.457064	0.596492	0.436642	0.496733	1.71499	1.26017	1.02477	1.33331	1.92825	1.81529	2.07947	1.941	2.19518	2.25176	2.34664	2.26453	0.804134	0.702519	0.561943	0.689532	0.773596	0.904487	0.850161	0.842748
EVM0056412	1.27439	2.50175	1.97103	1.91572	2.53078	2.13515	2.16298	2.2763	1.81426	1.82059	1.60351	1.74612	4.18212	3.33589	3.44721	3.65507	2.36403	1.76129	2.26291	2.12941	1.49741	1.61755	2.20877	1.77457	1.8599	1.50558	1.68233	1.68261	1.84573	1.37897	1.61936	1.61469	3.84495	2.03407	1.54279	2.47394	1.70588	2.5352	3.01782	2.41963
EVM0056416	6.87314	6.62512	6.26101	6.58642	10.4054	8.79496	11.9805	10.3936	21.3529	18.3124	21.1746	20.28	12.7806	11.3179	12.3573	12.1519	8.71813	9.68539	8.80037	9.06797	11.7296	11.2886	9.04256	10.6869	13.1716	12.018	11.4246	12.2047	13.3381	12.9254	13.6346	13.2994	11.1832	9.59184	10.2811	10.352	9.16186	8.82287	8.75178	8.91217
EVM0056417	6.30682	7.15909	7.67424	7.04672	4.83103	4.76974	5.62876	5.07651	5.34439	5.17381	4.7844	5.10087	2.70401	2.78702	2.72398	2.73834	3.85819	4.18417	4.16823	4.0702	4.68922	5.81779	5.70114	5.40272	2.0605	1.91799	2.38699	2.12183	4.18798	3.56094	3.41097	3.71996	1.91229	1.83711	1.7355	1.8283	2.53173	2.67754	2.28863	2.4993
EVM0016334	22.8405	22.3865	21.6428	22.2899	38.8455	36.4583	38.1065	37.8034	58.1148	59.2569	59.4294	58.9337	76.9719	78.0744	79.2387	78.095	52.5693	53.8291	53.3195	53.2393	27.0512	25.6404	24.753	25.8149	38.297	39.7834	38.7397	38.94	46.6101	46.8519	47.2289	46.897	55.6596	49.6273	52.7056	52.6642	57.8939	52.7749	57.7726	56.1471
EVM0054201	3.83144	4.33601	4.62943	4.26563	1.66651	1.63567	2.0761	1.79276	2.50125	1.84258	1.7454	2.02974	1.67568	1.88897	1.99563	1.85342	1.96646	1.20774	1.0492	1.4078	1.28562	1.39643	1.03914	1.2404	1.65853	1.59791	1.31742	1.52462	0.263707	0.209499	0.382994	0.2854	0.618358	0.487954	0.483294	0.529869	0.442079	0.757951	1.18101	0.793679
EVM0027809	4.93314	4.48671	4.95874	4.79286	6.18681	5.82809	7.50169	6.50553	10.497	8.47974	9.03153	9.33608	6.80721	6.2804	7.47915	6.85558	7.50356	6.88676	5.67304	6.68779	5.28415	6.72997	7.09389	6.36933	6.35861	7.05116	6.62133	6.67703	10.6666	10.5075	9.42118	10.1984	5.96601	7.93735	7.94579	7.28305	7.54143	7.72235	7.00147	7.42175
EVM0022875	1.60833	1.15112	1.31644	1.35863	1.06572	1.27044	0.639968	0.992043	0.599551	0.665091	0.488819	0.584487	0.324433	0.555565	0.242198	0.374065	0.850188	0.706376	1.31739	0.957984	3.01258	2.54501	2.4723	2.67663	1.34766	0.955445	1.86478	1.3893	1.55808	1.46984	0.991164	1.3397	0.372945	0.329692	0.678618	0.460418	1.3401	1.11628	0.950696	1.13569
EVM0027806	6.61091	7.99423	6.99034	7.19849	7.35495	7.57863	10.033	8.3222	7.05309	7.58484	7.64562	7.42785	3.4165	4.7694	2.71987	3.63526	3.29559	4.16849	4.89169	4.11859	7.90941	5.5126	8.53019	7.3174	11.7849	9.2749	10.3011	10.4536	9.65253	10.4811	10.4042	10.1793	5.83001	5.18092	6.65324	5.88805	4.72473	5.17293	3.87005	4.58924
EVM0027805	1.85924	2.32024	1.2653	1.81493	1.70564	2.02847	1.92539	1.8865	4.67811	3.94291	4.7247	4.44857	5.27091	5.45039	4.62197	5.11443	3.36447	3.9894	3.93995	3.76461	2.924	3.74106	4.86696	3.84401	4.05101	4.31402	4.2341	4.19971	6.52318	5.62977	5.98923	6.0474	6.59991	5.77925	5.68126	6.02014	8.22552	6.04119	5.84005	6.70225
EVM0027802	48.5791	43.574	47.3446	46.4992	34.3768	36.9139	35.4584	35.5831	46.0837	43.8382	44.8214	44.9144	55.1776	57.2834	54.4309	55.6306	69.0726	71.4208	66.886	69.1265	69.0291	70.796	69.3146	69.7132	31.6295	31.4305	31.5245	31.5282	49.7764	48.9519	49.6326	49.4536	62.0645	65.1587	63.6387	63.6206	64.3461	65.1818	61.7237	63.7506
EVM0018467	4.28309	3.27018	3.8563	3.80319	3.12886	3.45386	3.98586	3.52286	4.38264	3.65942	4.29422	4.1121	3.50382	3.41843	3.7582	3.56015	3.78242	3.10507	3.33073	3.40608	1.82432	1.41251	1.85572	1.69752	1.32797	1.74721	1.84116	1.63878	1.9342	1.61838	1.52039	1.69099	1.40408	1.49579	1.53294	1.4776	1.6573	1.4788	1.22215	1.45275
EVM0018465	21.037	18.8527	20.257	20.0489	34.109	33.7629	33.4773	33.7831	47.4038	49.659	45.3558	47.4729	37.1163	37.0051	36.3052	36.8089	24.0993	23.3606	24.9687	24.1429	17.5537	18.1119	16.6216	17.4291	28.4069	25.9333	24.7389	26.3597	33.0114	31.2215	31.3317	31.8549	25.5004	24.7173	24.2474	24.8217	23.6157	25.7914	25.7668	25.058
EVM0040128	2.38354	1.91664	2.60486	2.30168	1.65303	1.6839	2.35054	1.89582	1.26119	1.24592	1.04646	1.18452	0.617447	0.629413	0.430812	0.559224	0.621691	0.918954	0.785028	0.775224	2.23865	1.59122	2.35271	2.06086	1.14411	1.27483	1.71288	1.37727	1.20041	1.00717	1.36788	1.19182	0.801429	0.358288	0.560632	0.57345	1.13684	1.28652	1.0107	1.14468
EVM0021426	2.26311	2.61672	1.96744	2.28243	2.75605	2.99692	2.50537	2.75278	1.70871	2.66193	2.47773	2.28279	1.2281	0.846959	1.41222	1.16243	0.73189	0.756238	1.30079	0.929638	3.13737	2.68484	2.15779	2.66	2.73118	2.64168	1.80449	2.39245	2.7644	1.94606	3.7265	2.81232	1.62689	1.95827	1.3975	1.66089	0.912362	1.67557	0.924205	1.17071
EVM0030406	3.95828	5.40513	2.33254	3.89865	2.70325	2.41995	3.94778	3.02366	6.50348	5.4475	5.89394	5.94831	9.10731	8.42689	9.07662	8.87027	7.51463	6.31866	8.18331	7.33887	7.94848	8.16972	8.81634	8.31152	4.55122	4.67554	4.00814	4.41164	6.66905	6.2592	9.66034	7.52953	9.94669	11.0694	13.0495	11.3552	11.4529	10.7722	11.232	11.1524
EVM0037489	0.494415	0.488724	0.256748	0.413296	0.785483	0.562948	0.640716	0.663049	0.385451	0.615195	0.821671	0.607439	0.871392	0.559642	0.496073	0.642369	0.465373	0.213014	0.539035	0.405807	0.100009	0.067798	0.20628	0.124696	0.018336	0.110644	0.183216	0.104065	0.049176	0.011787	0.120028	0.0603303	0.146757	0	0	0.048919	0	0	0.03458	0.0115267
EVM0040122	0.130454	0.103646	0.227401	0.153834	1.02316	1.3391	1.53868	1.30031	3.83132	3.54269	4.08986	3.82129	7.77589	6.70521	6.69354	7.05821	2.58259	2.40752	1.71103	2.23371	0.280697	0.083607	0.223862	0.196055	0.946937	1.11238	0.493375	0.850898	0.204107	0	0.056569	0.086892	1.96175	1.67078	1.27188	1.6348	1.2275	1.05377	1.42226	1.23451
EVM0040120	5.63059	5.43306	5.3414	5.46835	1.83234	1.60642	2.24881	1.89586	0.797981	0.624313	0.487969	0.636754	1.40964	1.65998	1.32096	1.46352	2.22292	1.92013	1.64092	1.92799	4.48315	4.67395	4.01089	4.38933	2.00582	2.03407	2.33913	2.12634	0.935519	0.979391	0.807074	0.907328	2.28321	2.5801	2.48435	2.44922	3.01374	3.1843	3.13671	3.11158
EVM0021424	0.359654	0.262369	0.124818	0.248947	0.411993	0.092099	0.37003	0.291374	0.810774	0.849262	0.700429	0.786822	0.805828	1.1233	0.756554	0.895228	0.933401	0.446954	1.01271	0.797688	0.261781	0.556043	0.655416	0.49108	0.301084	0.432244	0.295891	0.343073	0.706482	0.605508	0.808244	0.706745	0.772025	0.797703	0.673889	0.747872	0.583892	0.916636	0.586271	0.6956
EVM0016054	5.79856	6.60565	7.40102	6.60174	4.0856	3.71613	4.26947	4.02374	3.12746	3.11206	2.52113	2.92021	1.55447	1.69963	1.61283	1.62231	3.07163	3.83084	4.42577	3.77608	6.5028	6.92112	7.01979	6.81457	2.85474	3.60596	3.55473	3.33847	3.11821	3.95672	4.07048	3.71514	1.94964	2.61253	2.14693	2.23637	3.16152	2.94765	2.7765	2.96189
EVM0016051	16.7606	16.0118	13.3705	15.381	16.26	13.1062	14.6876	14.6846	4.36385	6.59121	4.8134	5.25615	13.5491	11.42	10.8241	11.931	14.739	16.2022	16.7091	15.8834	27.9451	25.093	25.2131	26.0837	19.1789	20.7666	20.7375	20.2277	11.2612	11.443	11.8387	11.5143	25.016	25.5969	28.4387	26.3505	25.4091	22.8357	26.0156	24.7535
EVM0016052	5.45541	5.82929	5.1079	5.4642	5.99977	5.15059	5.34387	5.49808	6.27184	3.9469	5.27078	5.16317	8.12082	8.17426	8.67567	8.32358	11.8751	13.2194	10.9193	12.0046	8.96018	8.39396	8.51864	8.62426	5.01196	5.16361	6.34211	5.5059	5.77223	6.81649	7.25179	6.61351	8.72378	10.8221	9.6354	9.72709	10.3309	10.8988	11.6071	10.9456
EVM0040329	11.0719	11.393	14.4349	12.2999	5.65684	6.24976	6.90229	6.26963	7.82044	6.49604	6.52732	6.94793	2.86337	3.64217	3.34531	3.28362	3.02437	6.6761	3.37514	4.35853	11.5826	13.7623	12.0754	12.4734	2.56962	2.25545	2.80111	2.54206	2.24918	2.68484	2.39839	2.44414	1.70806	2.81786	2.59889	2.37494	7.35137	6.10362	6.90743	6.78747
EVM0013265	1.6718	1.17244	1.29562	1.37995	1.01369	0.898261	0.994688	0.96888	1.15291	0.924904	0.860326	0.979379	3.65621	3.66833	3.19852	3.50769	2.19764	1.52241	1.70517	1.80841	1.14186	1.0084	1.20833	1.11953	1.33583	1.07582	1.06818	1.15994	0.759001	0.625011	0.45582	0.613277	5.19689	5.58496	6.3473	5.70972	3.85595	3.38544	3.12828	3.45656
EVM0040327	3.18969	3.15427	2.72897	3.02431	1.61175	2.28629	2.00306	1.96704	0.909786	2.74463	1.52209	1.7255	1.47759	1.06895	1.36448	1.30367	1.16215	0.605005	1.30939	1.02551	4.28543	4.22575	2.63056	3.71391	3.32187	3.38105	3.74884	3.48392	2.91615	2.47504	3.65656	3.01592	1.33366	1.21953	3.05794	1.87038	1.92763	0.689265	2.09388	1.57026
EVM0013267	10.2299	9.86265	12.9469	11.0132	7.75887	7.55871	7.07349	7.46369	6.6126	7.00565	6.99096	6.86974	3.17898	4.12632	3.85496	3.72009	6.24954	6.31919	6.37098	6.31324	6.26513	6.49019	5.9797	6.245	1.84193	1.52805	1.26349	1.54449	1.44793	1.99993	1.47965	1.6425	1.39025	0.926417	1.60723	1.30797	2.66582	1.82999	3.29558	2.59713
EVM0013260	50.6793	46.3865	51.5465	49.5374	135.802	144.828	143.257	141.295	40.0664	38.6974	39.6773	39.4804	58.0244	61.4644	61.5913	60.3601	36.941	35.7982	34.6592	35.7995	35.341	35.0786	35.5959	35.3385	142.91	138.173	145.572	142.218	48.5895	47.7814	46.0939	47.4883	74.8956	80.7283	72.7635	76.1291	43.1753	43.8966	42.7694	43.2804
EVM0040320	11.9833	10.282	12.8645	11.7099	266.02	264.11	261.461	263.864	239.147	228.192	238.188	235.176	264.838	260.487	272.587	265.971	159.729	154.912	157.611	157.417	12.8756	11.7542	12.0972	12.2423	220.171	208.26	213.451	213.961	170.735	169.921	171.611	170.756	170.282	176.382	171.785	172.817	93.884	97.9432	94.8191	95.5488
EVM0013262	2.90432	2.84233	2.79128	2.84598	9.65007	8.9072	8.27368	8.94365	6.97931	6.34063	7.35451	6.89148	8.40909	8.00723	8.86013	8.42548	5.98596	6.13642	6.00244	6.0416	3.08391	2.73484	3.40515	3.07463	8.23512	8.15272	9.20913	8.53232	5.15955	4.85295	4.50042	4.83764	6.98899	7.02359	7.92649	7.31302	5.85116	5.59766	5.60528	5.6847
EVM0013263	2.67771	4.09711	2.9378	3.23754	3.40741	3.52906	3.77644	3.57097	2.75589	3.57576	3.70021	3.34396	2.9123	2.70959	2.66397	2.76195	3.30342	3.04212	3.80502	3.38352	2.07394	2.26548	2.31812	2.21918	1.50908	1.53842	1.54522	1.53091	1.23005	1.16834	2.01147	1.46995	1.83999	1.61904	1.219	1.55934	1.02331	0.495527	1.41582	0.978221
EVM0042119	1.3539	1.26206	1.20631	1.27409	3.42933	3.87444	3.43976	3.58118	0.570744	1.18123	1.06412	0.938698	0.435477	0.500156	0.448371	0.461335	0.711256	1.36892	1.13397	1.07138	0.392188	0.142851	0.108553	0.214531	5.62967	4.74737	5.81321	5.39675	3.86459	3.67542	3.98248	3.84083	1.89863	2.45336	1.76611	2.03937	5.74275	5.15968	6.02829	5.64358
EVM0016463	12.6091	12.3929	13.4138	12.8053	14.5922	14.5884	13.1669	14.1158	27.1983	27.8891	28.0634	27.7169	26.2894	26.3656	28.6888	27.1146	18.0026	16.2834	17.9064	17.3975	10.4949	12.3349	9.56893	10.7996	9.7383	10.9712	10.2582	10.3226	14.4603	12.0836	12.82	13.1213	14.9461	16.2949	15.0603	15.4338	14.253	14.3998	15.0597	14.5708
EVM0005104	25.959	25.8517	20.1681	23.9929	30.3317	32.6635	31.5698	31.5217	16.4379	19.9322	17.4666	17.9456	10.8575	7.59135	8.41631	8.95506	23.9591	25.5544	22.3861	23.9665	29.13	27.9771	31.2647	29.4572	41.1263	40.7014	39.0559	40.2945	29.3049	32.9239	31.5531	31.2606	40.8822	34.481	34.1852	36.5161	23.1759	23.5268	20.5743	22.4257
EVM0045663	0.967911	1.22044	0.821831	1.00339	1.05242	1.33113	1.50322	1.29559	1.08759	0.896756	0.676114	0.88682	0.450266	0.282545	0.391218	0.374676	0.359115	0.689234	0.38392	0.477423	0.148905	0.063945	0.14495	0.119267	0.173069	0	0	0.0576897	0.129316	0.074629	0.117272	0.107072	0.066543	0	0	0.022181	0.072485	0.025387	0.063536	0.0538027
EVM0045662	2.64866	2.15151	2.01508	2.27175	1.81455	2.0064	1.8854	1.90211	2.53743	2.57643	2.65974	2.5912	3.62213	3.62286	4.54205	3.92901	3.28137	4.31006	4.26509	3.95217	1.13875	1.11571	1.33804	1.1975	0.726754	0.789241	0.786218	0.767404	0.832416	0.930753	0.938211	0.90046	1.1942	1.16929	1.14028	1.16793	1.57423	1.47751	1.27513	1.44229
EVM0045660	6.8811	4.73644	5.95612	5.85788	13.4653	17.1539	14.3248	14.9813	11.2417	13.1729	11.7953	12.0699	25.0612	25.1472	23.2479	24.4855	17.8401	18.7583	19.0007	18.533	5.70262	6.90424	5.07223	5.89303	9.72664	10.5394	12.831	11.0323	11.5557	8.89018	8.8064	9.75076	14.5574	15.6294	16.478	15.5549	16.032	13.9236	13.3136	14.4231
EVM0045669	4.40086	3.78894	4.58554	4.25845	2.22191	2.31328	2.60368	2.37962	2.12352	2.28792	2.50244	2.30463	2.00666	2.18916	1.83225	2.00936	4.73487	3.31326	4.17387	4.074	5.33366	4.74691	4.71523	4.93193	2.57134	2.48463	2.51268	2.52288	3.49975	3.09098	2.9355	3.17541	4.12641	4.3481	4.32177	4.26543	3.91928	4.28051	3.86836	4.02271
EVM0045668	7.4417	8.17381	7.79172	7.80241	9.72257	10.4407	11.0036	10.389	12.481	13.0813	14.2868	13.283	15.2561	14.0191	15.2025	14.8259	11.5422	11.0937	9.05299	10.563	6.62904	5.10849	4.44602	5.39452	8.69385	7.27609	6.72433	7.56476	5.84348	6.50851	5.57139	5.97446	5.74111	7.14667	6.53442	6.47407	5.46079	6.34497	6.52975	6.11184
EVM0044137	6.43839	4.98812	4.8396	5.42204	7.90097	6.45889	5.85623	6.7387	6.77903	7.72992	8.37137	7.62678	1.86511	1.25621	1.26076	1.46069	1.66661	1.99385	2.38045	2.01364	4.43769	4.22675	3.22683	3.96375	1.70586	2.01465	2.28867	2.00306	1.0598	0.881417	1.01674	0.985984	1.10921	0.513973	0.765711	0.796297	1.36901	0.981954	1.20941	1.18679
EVM0044132	11.1823	12.178	12.4915	11.9506	21.4626	21.7607	25.1725	22.7986	13.0001	12.9539	13.2527	13.0689	12.8675	13.238	13.3018	13.1358	11.479	11.137	10.5683	11.0614	9.62185	9.30725	9.87876	9.60262	22.9574	21.8563	23.4891	22.7676	12.4675	13.3656	12.622	12.8184	15.2642	14.2278	14.1016	14.5312	10.6409	9.34567	10.675	10.2205
EVM0049328	1.05044	1.28116	1.15347	1.16169	0.439807	0.366992	0.35636	0.38772	0.64282	0.171143	0.386238	0.400067	1.87988	1.57563	1.94958	1.8017	1.38536	1.46576	1.44769	1.43294	1.46945	1.0898	1.7289	1.42938	0.452644	0.855624	0.643235	0.650501	0.750218	0.240608	0.635451	0.542092	0.679951	0.714959	1.01423	0.803047	1.61543	1.01414	1.07574	1.2351
EVM0054848	3.10331	3.47961	3.66652	3.41648	2.85835	2.19771	1.74579	2.26728	1.42843	1.25029	2.01115	1.56329	0.492593	1.05542	0.560864	0.702959	1.53925	1.64701	1.60334	1.59653	2.92948	2.95208	3.96261	3.28139	2.40938	2.35954	1.37553	2.04815	4.60251	3.64127	3.22435	3.82271	0.987693	1.86123	1.05699	1.30197	2.20297	1.89489	3.075	2.39095
EVM0038843	25.0592	23.7426	23.4869	24.0962	22.3096	21.4676	21.638	21.8051	32.0528	31.9376	32.5409	32.1771	52.355	47.7334	51.2221	50.4368	43.742	42.3407	43.155	43.0792	27.7969	28.3032	25.5332	27.2111	30.0515	28.1462	25.0416	27.7464	35.7064	34.8118	36.9204	35.8129	45.7472	50.2722	45.7486	47.256	52.6705	52.304	51.1091	52.0278
EVM0038842	32.9949	31.7602	31.2781	32.011	29.9907	33.1885	28.8517	30.677	26.5232	25.5198	26.0941	26.0457	47.1112	46.4517	45.2585	46.2738	34.5826	35.7896	37.8496	36.0739	27.2229	28.3806	28.5511	28.0515	39.7636	37.2348	37.4057	38.1347	30.1649	29.6061	28.5107	29.4272	51.6639	50.1502	51.9108	51.2416	47.5337	49.9323	46.4508	47.9723
EVM0024878	26.5506	26.1926	25.0534	25.9322	16.489	16.7716	19.4462	17.5689	6.75293	7.44268	6.83504	7.01022	7.9062	7.45447	7.36769	7.57612	10.4952	8.81116	9.22765	9.51134	5.76817	6.86217	5.32027	5.98354	6.68548	6.98024	6.7799	6.81521	2.62698	2.28939	2.48758	2.46798	2.32505	2.05272	1.75835	2.04537	2.96316	2.70412	2.37612	2.68113
EVM0000182	10.9471	12.5892	11.9387	11.825	5.20366	5.34684	5.69129	5.41393	6.19129	5.59997	7.02957	6.27361	3.00471	3.93935	4.38192	3.77532	7.46914	8.17207	7.46008	7.70043	13.5608	13.9564	12.7114	13.4095	5.29518	5.68951	4.85574	5.28014	7.26004	8.34818	7.89485	7.83436	3.15288	2.97379	4.28635	3.47101	5.14456	3.75003	4.84156	4.57872
EVM0043676	2.39583	2.64704	2.73015	2.59101	1.50618	1.1245	1.51099	1.38056	0.582706	0.773857	0.473874	0.610146	0.261504	0.195915	0.272216	0.243212	0.444365	0.654092	0.880748	0.659735	2.94411	2.4908	2.30143	2.57878	2.90228	2.42459	2.43866	2.58851	1.52172	1.93242	1.63275	1.69563	0.95942	0.958198	0.800612	0.906077	2.02864	1.40344	1.84498	1.75902
EVM0042027	1.64296	2.20102	2.68393	2.17597	1.65372	1.76104	1.81916	1.74464	1.14596	1.18016	2.01282	1.44632	1.81016	1.30794	1.58107	1.56639	1.69565	2.0968	2.11452	1.96899	1.79716	1.4506	1.31948	1.52241	0.624855	0.736855	0.612115	0.657942	0.46132	0.383846	0.561713	0.46896	0.477616	0.392392	0.283755	0.384588	0.507987	0.513697	0.690349	0.570678
EVM0009810	1.19129	1.05092	1.14061	1.12761	1.62458	1.83027	1.81884	1.7579	1.03316	0.744307	0.85656	0.878009	0.78642	0.635861	0.649944	0.690742	0.569098	0.753734	0.614062	0.645631	1.32132	1.34492	1.25318	1.30647	1.30821	1.28061	1.65907	1.41596	0.857003	0.733183	1.15647	0.915551	0.456867	0.529081	0.880892	0.62228	0.500238	0.372251	0.669712	0.514067
EVM0009814	5.91119	4.62713	6.23605	5.59146	5.44827	7.4577	5.53704	6.14767	13.2634	12.1554	11.574	12.331	9.01482	9.15747	10.0886	9.42031	8.13577	9.36631	7.63226	8.37811	4.40603	4.77979	5.17935	4.78839	7.0154	7.0834	5.80917	6.63599	10.3585	13.8452	13.7437	12.6491	5.9036	5.35727	5.43683	5.5659	9.66762	7.75104	9.91505	9.11124
EVM0009819	2.23365	2.01599	2.19643	2.14869	0.904803	0.951449	1.23455	1.03027	1.03973	0.805299	0.657507	0.83418	0.625861	0.554482	0.905921	0.695421	1.02694	1.55314	0.910313	1.16346	1.43344	1.2704	1.38439	1.36274	1.07653	0.410597	0.629526	0.705552	0.928987	0.78284	0.780456	0.830761	0.685503	0.739086	1.03052	0.81837	0.993384	1.01703	1.42045	1.14362
EVM0034216	1.51803	1.73291	1.34702	1.53265	1.49367	1.02855	1.06775	1.19666	0.874881	0.674974	0.615875	0.72191	0.529846	0.122271	0.775662	0.475926	0.88064	1.09917	1.06496	1.01493	2.44856	2.03807	2.24022	2.24228	2.39031	1.68752	1.62803	1.90195	1.91657	1.31047	1.29371	1.50692	1.24744	1.36578	1.2522	1.28847	1.59179	1.15545	1.6988	1.48201
EVM0034214	16.1164	15.0227	16.1296	15.7562	10.1247	7.78312	9.19721	9.03502	11.5413	13.4441	11.9633	12.3162	19.4952	18.8122	19.7656	19.3577	17.7339	16.9973	14.9211	16.5508	13.3604	18.0736	17.2934	16.2425	9.03643	8.49814	9.44906	8.99455	14.0121	12.9172	10.7644	12.5646	15.5146	18.5252	18.619	17.5529	16.5086	17.1915	19.508	17.7361
EVM0034212	3.99086	5.75962	4.71475	4.82174	4.06143	4.02627	3.83917	3.97562	3.81298	4.15447	3.20518	3.72421	3.0463	3.25741	3.42969	3.24447	4.34604	3.11581	3.59565	3.68583	7.47475	6.50247	6.77137	6.9162	9.42135	8.57623	7.28578	8.42779	7.34777	7.47535	7.23552	7.35288	6.52725	7.80621	6.25089	6.86145	8.65882	6.34219	7.1927	7.3979
EVM0034210	21.4365	24.9687	23.528	23.3111	10.4644	9.11575	9.061	9.54706	27.7528	26.4524	24.9765	26.3939	34.9306	32.074	30.454	32.4862	32.8004	27.0216	30.9582	30.2601	9.60586	8.19856	9.0661	8.95684	3.38436	3.14736	4.11065	3.54746	5.83232	7.75275	8.00915	7.19807	4.78027	4.83199	5.13205	4.91477	9.30315	6.33714	7.3796	7.6733
EVM0034211	15.4289	14.6395	13.9891	14.6858	23.2104	24.881	24.4412	24.1775	14.8084	14.623	12.7529	14.0614	10.4552	10.7197	10.8923	10.6891	9.27703	8.73109	9.49777	9.16863	12.636	10.2727	11.0616	11.3235	21.437	21.7914	20.6303	21.2862	10.6837	13.2226	12.6771	12.1945	9.2237	8.56794	10.2819	9.35785	7.67361	10.3046	9.04113	9.00645
EVM0037161	6.6552	6.14577	5.00343	5.9348	3.70033	3.31891	3.73076	3.58334	2.63252	2.42312	2.8715	2.64238	2.14984	1.53797	1.78702	1.82494	2.6299	2.35521	2.78508	2.59006	6.73177	5.90986	6.01264	6.21809	5.59073	6.10255	6.34662	6.0133	4.16031	3.85599	4.08249	4.03293	2.84497	3.33356	2.12291	2.76715	3.43578	2.78972	3.85815	3.36122
EVM0001788	2.42565	2.04654	2.32809	2.26676	2.24161	1.66526	1.34785	1.75157	2.75622	3.00615	3.02095	2.92777	4.35604	4.40541	3.59317	4.11821	6.61202	4.94343	5.74733	5.76759	3.36818	2.95621	3.43932	3.25457	1.46669	1.71708	1.44323	1.54234	3.26236	2.83629	3.1529	3.08385	2.89563	2.57122	2.6459	2.70425	3.4223	1.79413	3.20015	2.80553
EVM0023918	13.6598	13.2685	13.84	13.5894	10.2581	9.24693	9.36551	9.62351	7.33441	7.73571	6.42165	7.16392	4.9877	4.82978	4.71278	4.84342	7.14958	7.10352	6.67249	6.9752	11.2389	10.0718	11.1227	10.8111	8.05754	7.59711	7.11725	7.59064	6.75425	6.82181	6.62842	6.73483	5.13042	5.87776	5.7032	5.57046	5.57317	5.76134	5.39828	5.5776
EVM0023914	25.5572	26.586	27.0334	26.3922	17.6143	17.4917	18.6107	17.9056	30.4221	32.7283	29.8402	30.9969	36.6836	36.1591	37.0527	36.6318	33.8178	32.7501	33.5703	33.3794	25.6586	26.5443	24.6887	25.6305	24.0508	23.2676	23.2102	23.5095	29.6465	29.4432	28.2583	29.116	28.3631	29.0071	27.6728	28.3477	30.3924	31.2794	31.4943	31.0554
EVM0031049	0.906337	1.94051	1.05837	1.30174	0.993505	1.47929	0.915296	1.12936	0.423446	0.234873	0.377959	0.345426	0.541863	0.243178	0.423364	0.402802	0.523004	0.295436	0.37723	0.398557	0.660765	1.07607	1.13272	0.95652	0.887235	0.629357	0.443455	0.653349	0.327567	0.398688	0.536501	0.420919	0.367458	0.593219	0.151157	0.370611	0.117312	0.264849	0.390528	0.257563
EVM0028283	0.074952	0.142446	0.144861	0.120753	1.58926	2.22441	2.20266	2.00544	1.86823	1.79102	1.85581	1.83835	2.45225	2.40494	1.73127	2.19615	2.2114	1.93441	1.85094	1.99892	0.517827	0.54866	0.641068	0.569185	3.00092	2.68507	2.52027	2.73542	1.97097	1.7247	1.47195	1.72254	3.40337	3.45784	3.44553	3.43558	1.59702	2.54461	2.37777	2.17313
EVM0025423	1.43467	1.44073	1.71881	1.5314	1.09336	0.974092	1.47989	1.18245	1.40209	1.59361	1.26682	1.42084	1.97041	1.91528	1.77095	1.88555	2.58519	1.92839	1.27346	1.92902	0.830912	1.12822	0.982964	0.980697	0.421209	0.689315	0.482967	0.531164	0.758195	0.940685	0.60952	0.769467	0.706096	0.354748	1.08372	0.714854	0.644352	0.691171	0.726044	0.687189
Salix_babylonica_newGene_7683	0	0	0	0	0	0	0	0	0	0	0	0	0	0	0.030158	0.0100527	0	0	0	0	3.46347	2.44258	1.92444	2.61016	1.5178	1.6767	1.97698	1.72382	0.790815	1.73527	0.739212	1.08843	2.39959	2.10852	2.19872	2.23561	2.40584	2.14438	2.58547	2.37856
EVM0025420	3.72087	3.61788	5.16416	4.16763	2.78706	2.38117	1.76039	2.30954	1.99532	2.09307	1.81084	1.96641	2.52096	1.83379	2.40728	2.25401	3.16837	3.70201	4.71525	3.86187	3.83459	3.92233	4.50103	4.08598	1.11799	1.8826	1.20688	1.40249	2.20032	1.69697	1.47504	1.79077	1.79799	2.82724	2.75333	2.45952	2.40844	2.11068	1.79544	2.10485
EVM0025427	7.15201	7.71481	7.60229	7.4897	4.75421	5.48897	6.09344	5.44554	6.10565	5.61479	6.17857	5.96634	3.09797	2.21615	3.38293	2.89902	1.90035	1.75897	1.59967	1.753	1.72386	1.49545	1.23667	1.48533	9.46751	9.64906	9.24028	9.45228	2.17714	1.71266	2.11606	2.00195	0.656312	0.847281	0.667966	0.723853	1.09335	1.10141	1.11455	1.1031
Salix_babylonica_newGene_7682	0.819128	0.896688	0.67345	0.796422	1.00802	0.621681	0.604233	0.744644	0.979534	0.850823	0.689927	0.840095	1.64143	1.4512	2.22639	1.77301	1.42138	1.58491	0.86514	1.29048	1.60212	0.811518	0.438723	0.950788	0.877879	0.677786	0.626369	0.727345	0.94598	0.54299	0.51892	0.669297	0.508617	0.437781	0.577496	0.507965	0.407928	0.848093	0.98034	0.745454
EVM0025428	12.5349	14.2766	12.1088	12.9735	15.2065	12.6287	12.7914	13.5422	7.01568	6.69236	8.36517	7.35774	8.56487	5.86437	6.6295	7.01958	8.69271	6.69084	6.16764	7.18373	25.0313	29.4498	25.5939	26.6917	61.7923	58.5017	63.8127	61.3689	29.6573	27.2106	28.3231	28.397	22.2622	22.6803	21.4932	22.1453	25.5296	25.2527	24.3779	25.0534
EVM0048746	1.34608	2.30212	2.25294	1.96704	1.1182	1.13799	0.811746	1.02264	1.05663	1.65907	1.0054	1.24037	1.58216	1.8456	1.50151	1.64309	1.82244	2.96331	2.46261	2.41612	0.603464	0.422473	0.63808	0.554672	0.443731	0.416878	0.458683	0.439764	0.479372	0	0.602685	0.360686	0.752581	0.652393	0.552202	0.652392	0	0.856334	0.798253	0.551529
EVM0048745	4.02445	6.54485	3.82178	4.79702	4.28436	5.5683	5.76666	5.20644	3.31061	1.99381	3.51549	2.93997	1.53238	1.86966	1.41881	1.60695	3.2546	3.3803	2.80374	3.14621	7.51952	7.29085	7.73332	7.51456	9.48383	9.32984	8.20772	9.00713	7.11847	6.18027	7.43056	6.90977	3.15025	2.98384	3.44043	3.1915	4.37334	4.18494	3.37239	3.97689
EVM0048742	1.08512	1.51741	1.04177	1.21477	0.929101	0.997444	0.964741	0.963762	0.75507	1.25342	0.75926	0.922582	0.621043	0.903474	0.38911	0.637876	0.727054	0.70244	0.422077	0.61719	0.751724	0.758068	0.321132	0.610308	0.967947	1.09853	1.80796	1.29148	0.53755	0.554357	0.387274	0.49306	0.48685	0.477036	0.517742	0.493876	0.624384	0.760441	0.637603	0.674143
EVM0048741	9.13101	10.4773	8.59936	9.40256	9.59115	10.4885	8.82885	9.63616	5.14274	7.49174	5.74868	6.12772	7.77679	6.22628	7.32713	7.11007	15.4234	16.9396	17.8801	16.7477	78.3605	84.4865	86.2828	83.0432	34.7011	36.6599	35.3232	35.5614	84.9959	69.5277	82.9956	79.1731	72.8475	67.236	70.5314	70.205	100.697	92.9447	102.891	98.8442
EVM0040469	0	0	0	0	0.123153	0	0.278933	0.134029	0.139499	0.101887	0	0.080462	0.205967	0.125946	0	0.110638	0	0.111332	0.094352	0.0685613	0	0.127364	0	0.0424547	0.374843	0.444227	0.615037	0.478036	0.62808	0.698215	0.816106	0.714134	0.896529	0.891396	1.00151	0.929813	0.549384	0.633087	0.553612	0.578694
EVM0031121	0.669926	0.772483	1.04588	0.829431	1.57877	1.53018	1.1928	1.43391	1.9522	1.85912	2.10755	1.97296	1.44788	1.56627	1.35806	1.4574	1.4839	1.27531	1.38643	1.38188	1.40033	1.16387	1.0908	1.21833	1.34965	1.08963	1.4244	1.28789	1.71779	1.94235	1.5007	1.72028	1.20205	1.34789	1.87487	1.47494	1.53139	1.48445	1.44416	1.48667
EVM0042235	1.73063	1.0832	2.32241	1.71208	2.95259	1.8992	1.98419	2.27866	1.52247	4.86693	2.27219	2.8872	13.3947	12.4216	11.5369	12.4511	15.632	16.8874	21.259	17.9261	7.83701	6.95401	9.57546	8.12216	0.673976	1.63019	1.36659	1.22359	2.02464	2.73475	0	1.58646	11.9974	11.2837	11.2264	11.5025	10.9247	14.0467	14.4562	13.1425
EVM0042234	1.33148	1.0693	2.17939	1.52672	8.98129	9.61515	7.84472	8.81372	6.15787	6.77847	6.79899	6.57845	3.69812	2.6809	3.05461	3.14454	2.85996	2.56535	4.06685	3.16406	0.086007	0.13268	0.242658	0.153782	1.94053	2.11552	1.91336	1.98981	0.213591	0.534625	0.603236	0.450484	1.21349	0.55873	1.32986	1.03403	1.73293	0.801779	1.76983	1.43485
EVM0042236	0.862209	0.844021	1.73301	1.14641	1.78586	2.8841	2.72897	2.46631	3.28597	3.32981	4.65848	3.75809	4.99772	5.53547	3.54549	4.6929	2.24691	2.55083	1.87281	2.22351	0.782103	0.230694	0.214205	0.409001	1.91024	2.18325	1.41576	1.83642	1.51606	1.0533	0.869324	1.14623	1.36857	1.66057	1.61603	1.54839	0.980972	0.837062	0.830118	0.882717
EVM0042233	3.94475	4.36249	4.40639	4.23788	17.3515	18.5925	16.2459	17.3966	6.45763	4.93166	5.18405	5.52445	2.12823	2.53391	3.24072	2.63429	2.28695	2.45786	2.52668	2.42383	2.67219	2.59187	2.92003	2.72803	6.66326	6.79463	6.82013	6.75934	6.6554	7.20843	7.05388	6.97257	2.48004	2.37443	2.47066	2.44171	3.20291	2.91225	3.62329	3.24615
EVM0023693	27.7455	28.3851	25.5677	27.2328	70.3668	61.8353	58.9991	63.7337	47.9062	49.652	48.9417	48.8333	29.2836	31.5293	29.9405	30.2511	27.3028	28.1341	31.1786	28.8718	27.8485	34.817	30.6542	31.1066	67.7228	72.1227	67.5612	69.1356	53.5013	56.7142	49.5823	53.266	41.2725	38.3887	36.4169	38.6927	27.4444	30.1278	29.5777	29.0499
EVM0015965	10.0364	10.3793	9.78519	10.067	25.4117	24.8609	27.5703	25.9476	4.06344	3.74561	4.26253	4.02386	5.38131	6.36095	6.69104	6.14443	9.52555	8.28226	10.7714	9.52641	11.9123	11.9111	12.568	12.1305	18.0729	18.2841	19.1781	18.5117	7.42097	6.1169	7.74913	7.09566	7.75415	6.64775	7.03645	7.14612	9.71332	9.20039	9.11575	9.34315
EVM0047772	0.734857	0.683641	0.712041	0.71018	1.03718	0.870883	0.815151	0.907737	0.858962	0.717102	1.57977	1.05195	1.15475	1.67867	1.63072	1.48805	1.73671	1.5448	1.56064	1.61405	1.78885	0.935724	0.920598	1.21506	1.13469	0.995	0.520379	0.883356	2.18824	1.91473	2.1861	2.09636	2.05998	2.60156	1.31189	1.99114	1.31736	1.47736	0.938817	1.24451
EVM0047770	6.27433	6.25739	6.53304	6.35492	20.1604	21.5885	19.5109	20.4199	10.9429	8.4954	8.72487	9.38772	56.9404	57.1826	55.5476	56.5569	35.1949	36.7461	37.6639	36.535	6.48876	7.65984	7.55257	7.23372	18.6906	20.0123	21.8528	20.1852	12.8896	13.2392	13.7717	13.3002	63.7563	66.5236	64.1128	64.7976	29.7911	29.4799	30.9492	30.0734
EVM0047779	32.1809	24.2886	30.323	28.9308	15.404	15.25	16.9741	15.876	12.2244	13.176	12.52	12.6401	7.70047	8.29893	9.05127	8.35022	13.4945	13.5965	12.938	13.343	62.9584	57.2317	63.1207	61.1036	21.6417	23.2156	22.6217	22.493	24.5674	24.8199	25.1521	24.8464	13.9743	12.4658	15.2085	13.8829	29.1327	29.7663	34.0344	30.9778
EVM0039335	6.58582	5.24248	5.44048	5.75626	6.01208	6.13004	6.18803	6.11005	5.15722	4.04956	4.23719	4.48132	2.28081	1.95086	2.49387	2.24185	2.21878	1.91859	2.52737	2.22158	4.00271	4.76304	4.50404	4.42326	4.60061	4.33925	4.13061	4.35683	4.07299	4.62871	3.72824	4.14332	1.96044	2.24225	1.97952	2.06074	2.65048	2.23249	1.66283	2.18193
EVM0039332	0.049825	0.01297	0	0.0209317	0.03756	0.023395	0	0.0203183	0.041943	0.035349	0.042073	0.0397883	0	0	0	0	0.015479	0	0	0.00515967	0.497146	0.431462	0.243593	0.390734	0.577828	0.657735	0.876682	0.704082	0.886612	0.448291	0.620494	0.651799	0.112678	0.123479	0.082001	0.106053	0.141088	0.119733	0.044452	0.101758
EVM0039333	0.883103	1.15948	0.944718	0.995768	0.264986	0.346793	0.261847	0.291209	0.60867	0.645871	0.39887	0.551137	1.17341	1.68504	1.05169	1.30338	1.62967	1.86279	1.26284	1.5851	1.44633	2.05892	2.6116	2.03895	0.854839	0.950769	0.927695	0.911101	1.12379	0.704427	1.94045	1.25622	3.92338	3.64682	3.88944	3.81988	4.96586	4.71309	4.6252	4.76805
EVM0046422	0.933769	0.843181	1.16759	0.981514	0.270845	0.31372	0.281451	0.288672	0	0.100815	0.085853	0.0622227	0	0.053358	0	0.017786	0.209862	0.234097	0.157493	0.200484	0.616575	0.634111	0.96389	0.738192	0.89601	0.677771	1.08884	0.887539	0.914468	0.902985	0.67768	0.831711	0.285812	0.165006	0.054433	0.168417	0.33942	0.368533	0.08211	0.263354
EVM0022935	0.843473	1.90026	1.84039	1.52804	0.955524	1.239	1.44433	1.21295	0.857057	0.245208	0.623591	0.575285	0	0.086326	0.171685	0.0860037	0.120025	0.713178	0.07929	0.304164	6.50728	5.65292	5.48607	5.88209	2.18497	1.63006	2.72658	2.18054	1.85509	2.4447	2.8699	2.3899	0.160922	0.412822	0.29238	0.288708	0.204903	0.843446	0.948432	0.665594
EVM0039338	20.0861	18.6483	15.0662	17.9336	9.95655	9.06602	8.45627	9.15961	10.121	9.02605	8.59219	9.24641	5.89643	6.49502	6.35279	6.24808	10.0701	9.87383	8.79316	9.57904	16.4629	16.1489	16.3996	16.3371	8.45053	9.53484	9.79178	9.25905	9.67952	9.4887	13.1917	10.7867	10.7717	11.4382	9.05713	10.4223	10.618	9.37808	10.1501	10.0487
Salix_babylonica_newGene_9702	3.41983	4.88371	4.92392	4.40915	2.72182	2.3165	3.04555	2.69462	1.89788	2.01216	1.70127	1.87044	1.24609	1.83437	1.08411	1.38819	2.00088	2.29603	1.97505	2.09065	5.00949	3.09805	2.60725	3.5716	1.70106	2.31138	3.17948	2.39731	3.30707	2.64733	3.03596	2.99679	2.45846	1.33903	1.5443	1.7806	1.78511	1.45129	2.03455	1.75698
EVM0000230	5.50957	5.22691	6.04221	5.5929	4.48614	4.18428	4.66584	4.44542	3.49198	4.0828	3.9409	3.83856	2.59304	2.75168	1.93865	2.42779	3.00601	2.94157	1.92293	2.6235	4.92387	5.5514	4.38156	4.95228	6.33024	5.59598	5.51417	5.81347	5.16976	5.70161	5.35949	5.41028	2.10395	3.11199	2.25647	2.4908	3.63687	4.1084	3.98589	3.91039
Salix_babylonica_newGene_9704	5.19415	5.45969	5.57448	5.40944	5.01328	4.9039	6.85739	5.59152	3.21239	3.9482	2.23281	3.13113	2.71558	2.77607	2.95978	2.81714	4.2046	5.9941	6.60023	5.59964	2.24028	2.3561	1.99679	2.19773	2.81086	2.71892	2.79106	2.77361	1.22705	1.87518	2.25714	1.78646	2.04663	2.72485	1.82918	2.20022	3.26579	3.16042	3.51581	3.31401
EVM0017757	56.3523	54.7814	58.5876	56.5738	81.2553	81.9224	68.8153	77.331	84.3516	89.9245	78.9381	84.4047	49.1975	54.7582	51.8139	51.9232	29.9726	25.1556	28.8552	27.9945	68.3433	71.2388	72.5485	70.7102	140.535	138.056	145.944	141.512	175.778	161.003	159.852	165.545	103.882	100.607	104.237	102.909	95.4849	87.91	89.0655	90.8201
EVM0047271	1.23979	1.62138	0.895381	1.25219	2.11502	1.23782	1.45717	1.60333	1.12611	2.16951	1.56564	1.62042	1.19903	2.83216	1.892	1.97439	2.5066	1.75039	3.04089	2.43263	3.75429	4.5753	5.691	4.67353	2.34799	2.75801	2.61636	2.57412	2.67057	2.21715	4.01633	2.96802	3.96047	3.28534	3.45248	3.5661	5.09481	4.38342	4.7159	4.73137
EVM0033888	1.00022	1.39027	1.66155	1.35068	0.995114	0.789348	0.917589	0.900684	0.794603	0.509893	0.521339	0.608612	1.61577	1.39888	1.01759	1.34408	1.08777	1.77471	1.19698	1.35315	1.54496	1.11995	1.45687	1.37393	1.43212	0.653707	1.60127	1.22903	0.985362	0.965953	1.12377	1.02503	1.20185	1.5783	1.77589	1.51868	2.02013	1.08908	2.13692	1.74871
EVM0033889	6.11217	5.84297	6.17215	6.04243	2.71092	2.59686	2.81952	2.7091	4.40066	5.31773	5.73476	5.15105	5.84612	5.27082	4.53947	5.2188	4.34954	4.20011	4.41958	4.32308	4.95912	5.12759	6.11549	5.40073	2.19191	2.67742	2.53724	2.46885	2.29469	4.39407	2.69963	3.12946	5.96499	5.89936	5.91302	5.92579	5.13319	5.89728	8.10188	6.37745
EVM0033880	54.4636	51.231	52.4362	52.7103	23.5033	22.893	22.6325	23.0096	6.52709	6.20985	6.64746	6.46146	40.6405	40.9915	40.0049	40.5456	58.2129	53.3619	55.6151	55.73	61.9814	62.3115	64.6022	62.965	23.9776	22.0683	21.0222	22.356	8.2527	9.31808	9.31344	8.9614	25.2276	27.633	27.8529	26.9045	41.604	40.237	39.187	40.3427
EVM0033887	15.3565	15.6496	16.8958	15.9673	11.0681	11.5214	11.5063	11.3653	18.8799	17.5153	19.18	18.5251	27.097	27.7537	28.6045	27.8184	26.4704	24.7306	24.7991	25.3334	21.1214	20.727	19.8945	20.581	12.6639	13.2483	13.2796	13.0639	19.0883	18.667	18.7745	18.8433	21.1927	23.656	22.5866	22.4784	27.161	27.5536	26.9974	27.2373
EVM0033885	1.64041	1.89437	2.21029	1.91502	5.36986	5.35427	4.86683	5.19699	4.8046	4.39497	4.70907	4.63621	3.29962	4.09664	3.56959	3.65528	5.31022	5.4764	6.6327	5.80644	4.93404	5.023	5.36723	5.10809	5.1921	6.50377	6.11484	5.9369	4.5099	3.96555	4.53507	4.33684	3.7305	3.83655	4.85984	4.1423	7.10134	7.08792	8.26468	7.48465
EVM0000239	20.2588	17.8872	20.2175	19.4545	9.71866	9.13631	8.24334	9.03277	3.24284	3.94183	4.50152	3.8954	4.06902	4.21164	3.62776	3.96948	7.01426	6.09645	5.82507	6.31193	13.2519	13.709	14.6258	13.8622	6.12445	6.86309	6.50658	6.49804	4.48147	4.3598	3.96377	4.26835	4.145	3.89709	3.73406	3.92538	4.64003	4.77465	4.78201	4.73223
EVM0007941	9.71876	11.0152	11.0762	10.6034	15.8231	16.5978	16.0487	16.1565	19.2626	20.0498	18.9365	19.4163	26.9255	30.4622	27.206	28.1979	28.8976	28.6003	29.2048	28.9009	15.6193	15.0954	14.9637	15.2262	16.9292	17.7884	17.6266	17.4481	18.1408	21.0343	18.2569	19.144	26.392	24.5404	26.7177	25.8834	30.1571	29.8359	29.5472	29.8467
EVM0000888	1.96418	1.4785	1.89252	1.7784	1.42603	0.965146	1.11894	1.17004	1.031	1.08369	1.77767	1.29745	3.03781	3.53596	3.45709	3.34362	5.40987	4.44328	5.1996	5.01758	3.7578	4.25759	4.35927	4.12489	1.14513	1.38763	1.48956	1.34077	1.73264	1.41028	2.24939	1.79744	4.05457	2.89118	3.9013	3.61568	5.188	5.21924	5.33027	5.24584
EVM0000883	4.59196	5.21708	4.79876	4.86927	5.03509	3.9427	4.88986	4.62255	9.20614	8.58228	9.06041	8.94961	4.97815	4.10646	4.35042	4.47834	5.25184	5.62361	4.5668	5.14742	4.05521	3.60106	3.13508	3.59712	2.93352	3.54079	2.4161	2.96347	7.69045	7.44356	6.51845	7.21749	4.49058	3.62176	2.73991	3.61742	4.05179	4.03568	3.45067	3.84605
EVM0000887	30.4379	28.6879	24.9206	28.0155	31.1147	29.0604	28.6975	29.6242	31.7756	34.7714	30.5806	32.3759	45.8713	47.7766	47.996	47.2146	59.8573	69.2297	64.9998	64.6956	31.0432	33.2783	34.8198	33.0471	18.205	18.113	20.042	18.7867	20.4615	21.2358	23.0086	21.5687	40.8203	36.4449	37.4079	38.2243	41.8217	45.658	38.3925	41.9574
EVM0005358	11.6391	10.5221	10.1796	10.7802	6.1321	7.02005	7.01851	6.72355	5.15291	5.70446	4.19302	5.0168	9.39498	9.48751	8.89167	9.25805	7.31174	9.10044	9.24179	8.55132	10.4454	11.18	10.9228	10.8494	7.99864	10.9946	8.28995	9.09438	7.22681	6.76548	6.59442	6.86224	8.12041	8.90629	10.1843	9.07034	10.1756	9.64337	10.6045	10.1411
EVM0056297	6.76539	6.64171	6.49259	6.63323	8.5016	8.756	8.95224	8.73662	5.85988	4.46819	5.23456	5.18754	4.60794	3.90146	4.60905	4.37282	4.35869	4.23276	4.89069	4.49404	5.70048	5.59483	5.69287	5.66273	8.76746	9.45207	11.001	9.74018	5.15216	4.55576	4.37997	4.69596	4.51244	3.7007	4.7554	4.32284	4.31775	3.71752	3.77193	3.93574
EVM0015037	3.17652	3.66798	3.74759	3.5307	6.10093	4.14314	4.85999	5.03469	2.38579	3.00019	1.87524	2.42041	9.63922	5.57489	7.75062	7.65491	10.0389	12.8402	11.748	11.5424	6.55869	5.05128	6.95384	6.18794	6.31579	5.41692	5.13611	5.62294	3.31657	4.02553	3.72058	3.68756	5.16152	4.63745	3.22897	4.34265	6.03841	5.87139	5.82474	5.91151
EVM0001285	6.91627	7.08604	5.84404	6.61545	25.1017	23.5445	21.3681	23.3381	59.4856	60.7115	55.5912	58.5961	53.2691	48.8572	49.6624	50.5962	35.9608	40.4555	48.5227	41.6463	1.88462	1.21512	1.47419	1.52464	10.4605	9.42601	9.4047	9.76373	29.5843	31.5484	30.5653	30.566	10.0535	8.3793	9.0277	9.15351	16.1272	17.0211	16.0545	16.4009
EVM0001284	53.1231	48.7844	53.6771	51.8615	48.466	49.0133	47.6703	48.3832	48.1273	49.9687	46.6343	48.2434	33.1854	34.9573	36.1739	34.7722	30.6611	30.6942	32.4742	31.2765	29.5236	31.8879	30.1461	30.5192	24.3917	22.047	21.4947	22.6445	28.6806	27.6022	28.8774	28.3867	35.0714	34.4349	34.517	34.6745	26.3117	26.8441	27.4552	26.8703
EVM0001281	0.249653	0.171454	0.280739	0.233949	0.256505	0.246349	0.312091	0.271648	0.418067	0.278121	0.383784	0.359991	0.347621	0.317262	0.191263	0.285382	0.255376	0.173739	0.317466	0.24886	0.68818	0.653406	0.7862	0.709262	0.82646	0.548984	1.04576	0.807068	0.919004	1.13644	1.04239	1.03261	1.36702	1.31214	1.09102	1.25673	1.05093	1.18951	1.17907	1.13984
EVM0057271	1.82366	1.49399	1.62101	1.64622	1.11288	1.06553	0.547377	0.908597	1.06922	1.36719	1.37883	1.27174	0.991324	0.906093	1.20175	1.03305	1.35469	1.42094	1.37664	1.38409	0.422561	0.386505	0.593221	0.467429	0.480421	0.569106	0.288126	0.445884	0.576618	0.62986	0.680578	0.629019	0.463475	0.309394	0.227631	0.3335	0.489456	0.570326	0.310615	0.456799
EVM0055280	6.19504	9.79191	6.09645	7.36113	30.0234	28.3279	23.1782	27.1765	21.6729	23.2095	18.834	21.2388	24.4933	22.0007	17.363	21.2856	18.712	17.3343	17.9745	18.0069	15.9632	19.4007	16.9132	17.4257	33.0844	41.1309	38.4032	37.5395	16.0067	8.88014	15.5847	13.4905	79.8814	53.6649	68.2095	67.2519	49.9362	43.893	44.6201	46.1498
EVM0055282	19.0219	15.2632	13.777	16.0207	13.4411	7.14746	7.49697	9.36186	13.8989	12.4222	11.7025	12.6745	4.80609	7.01875	9.66868	7.16451	17.0545	16.7557	11.6243	15.1448	11.787	0	0	3.92899	0.593508	5.07401	2.99179	2.88643	0	10.8584	0	3.61947	1.04868	0	0.390107	0.479595	0	0	0	0
EVM0055284	4.22221	5.03085	5.0625	4.77186	2.63617	2.49926	3.06196	2.73246	1.71248	2.07194	2.01342	1.93261	1.76663	1.97214	1.46982	1.7362	1.54903	1.53263	2.20019	1.76062	6.02909	6.12739	5.86154	6.00601	9.56593	9.35414	8.77596	9.23201	5.24952	3.7322	5.55734	4.84636	4.49764	4.43342	4.27206	4.40104	4.32895	5.63657	6.08405	5.34986
EVM0055288	1.8133	2.07079	2.22269	2.03559	0.539247	0.794199	0.900819	0.744755	0.499146	0.648896	0.47232	0.540121	0.282235	0.565629	0.155505	0.334456	1.10479	1.14268	1.08821	1.11189	1.63882	1.61049	1.78055	1.67662	0.930971	1.4408	0.918174	1.09665	0.704099	0.652036	0.873427	0.743187	0.912465	0.8074	1.433	1.05096	1.24012	1.65878	1.3765	1.42513
EVM0057275	3.49129	3.054	3.21684	3.25404	1.25522	1.04461	1.05269	1.11751	2.34062	1.10827	1.55581	1.66823	1.13929	1.93906	0.951217	1.34319	1.14309	1.83616	0.639001	1.20608	0.754605	0.359457	0.867671	0.660578	0.473217	0.389106	0.562444	0.474922	0.024263	0.366216	0.235595	0.208691	0.269798	0.088968	0.605701	0.321489	0.256365	0.592996	0.919657	0.589673
EVM0057274	1.70835	1.61493	1.30599	1.54309	1.60682	1.04954	1.23211	1.29616	2.36604	2.76975	2.40365	2.51315	2.63971	2.69561	3.42437	2.9199	4.04607	3.4137	3.05501	3.50493	1.27176	1.69837	2.06041	1.67684	0.855916	0.970786	0.822107	0.882936	1.98453	2.27284	1.83297	2.03011	1.54486	1.43328	1.85159	1.60991	1.95909	1.82777	2.37877	2.05521
EVM0049283	4.34597	3.55255	3.55091	3.81648	5.95672	5.79943	5.72784	5.828	4.39713	5.90239	5.08209	5.1272	1.19407	1.54556	2.42693	1.72219	1.20405	1.92322	1.8433	1.65685	2.13469	2.42252	3.28231	2.61317	5.64349	7.06636	6.90498	6.53828	2.28455	2.77697	3.0642	2.70857	0.989297	1.7401	1.35658	1.36199	2.28768	2.08332	2.58188	2.31763
EVM0009782	3.76856	4.02912	5.03441	4.27736	2.97636	3.08884	4.06595	3.37705	1.99684	2.64533	1.79207	2.14475	1.57032	1.13896	1.07907	1.26278	3.51373	3.64386	3.03187	3.39649	4.283	4.62858	5.2954	4.73566	3.80375	3.99944	4.18379	3.99566	4.96876	5.0704	4.83479	4.95798	3.26028	3.46199	3.54252	3.4216	3.14266	2.98797	3.42323	3.18462
EVM0009783	2.00257	2.85652	2.17641	2.34517	1.31721	1.65565	2.23436	1.73574	2.00903	2.45384	2.05704	2.1733	0.266657	0.403697	0.512634	0.394329	0.403448	0.123162	0.588308	0.371639	3.68052	4.65325	4.16979	4.16785	2.66166	3.22485	2.3144	2.73364	2.1315	1.40456	1.64771	1.72792	0.28279	0.140975	0.363619	0.262461	0.588625	0.453908	0.375619	0.472717
EVM0040868	4.18721	2.63904	2.02395	2.95007	2.3352	1.05255	1.62831	1.67202	1.49406	1.29205	2.08737	1.6245	1.3513	0.408935	0.673711	0.811316	14.6486	13.6294	14.6683	14.3155	2.68278	2.59022	3.31981	2.86427	0.883864	1.28053	1.47257	1.21232	0.337373	0.481027	0.54149	0.453297	0.49225	2.16166	1.31556	1.32316	2.49193	2.45173	2.64878	2.53081
EVM0031655	22.0621	19.842	16.9801	19.6281	19.4669	18.2393	16.3384	18.0149	36.8092	36.1044	38.7892	37.2343	37.5175	34.4427	34.8711	35.6104	40.1344	38.9865	47.0248	42.0486	25.0109	25.8973	23.5206	24.8096	11.5379	11.6791	12.5001	11.9057	28.6273	32.6096	33.2894	31.5088	36.145	34.084	34.0845	34.7712	31.2233	32.0192	32.7066	31.9831
EVM0031652	15.9894	17.1205	15.9075	16.3391	9.14842	10.8492	10.8937	10.2971	9.3656	8.93977	9.83795	9.38111	10.1224	7.67134	8.60695	8.80022	11.3901	12.5223	13.1684	12.3603	5.40932	8.16184	6.2512	6.60745	4.9792	5.41382	3.73797	4.71033	5.35596	6.40632	4.54416	5.43548	3.35646	2.61748	4.61375	3.52923	3.66238	5.81823	3.76283	4.41448
EVM0015038	5.34901	6.09887	5.06982	5.5059	5.35879	5.78248	5.53829	5.55985	2.6205	2.96628	3.0248	2.87053	2.25752	1.97538	1.82416	2.01902	4.03204	2.56374	2.67675	3.09084	6.65627	7.07987	6.22108	6.65241	4.75986	4.62005	5.45069	4.94354	2.57698	2.70593	2.56026	2.61439	1.95763	1.59963	1.30954	1.62227	2.25519	2.58208	2.40572	2.41433
EVM0031659	1.55344	1.14468	1.9483	1.54881	0.471443	0.419092	0.476636	0.455724	0.717705	0.749033	0.885084	0.783941	0.574948	0.766169	0.953369	0.764829	1.28562	1.44655	1.6212	1.45112	2.34217	2.6604	2.83602	2.61286	0.483706	0.538544	0.434513	0.485588	1.33778	1.6039	1.41483	1.45217	1.62716	1.89664	1.78456	1.76946	1.34441	1.55834	1.73989	1.54755
EVM0037769	192.573	191.476	195.284	193.111	271.053	249.646	264.111	261.603	199.092	200.73	199.911	199.911	160.291	158.118	156.93	158.446	150.494	147.07	128.973	142.179	120.086	119.485	125.685	121.752	130.914	125.926	126.84	127.893	128.292	128.12	134.077	130.163	115.586	115.215	110.956	113.919	98.43	96.798	98.0497	97.7592
EVM0037765	0.310295	0.577831	0.738627	0.542251	1.34552	0.560772	1.16337	1.02322	0.66722	0.308106	0.531813	0.50238	0.799515	0.340732	0.971437	0.703895	1.08731	0.940493	0.573214	0.867006	1.77885	2.67601	2.03315	2.16267	1.22352	1.3144	0.966909	1.16828	1.56601	1.34411	0.834334	1.24815	1.3641	1.546	1.44172	1.45061	1.11624	1.61561	1.68674	1.47286
EVM0009378	12.4337	11.2205	9.52132	11.0585	3.42763	4.51917	4.16104	4.03595	2.61237	3.87671	2.871	3.12003	2.70969	2.63738	3.66818	3.00508	5.34679	5.23855	5.37795	5.3211	8.63569	7.71005	8.31569	8.22048	3.63536	3.66045	2.97664	3.42415	5.9103	6.29376	4.15907	5.45438	3.60612	2.89789	2.75465	3.08622	4.5872	4.47876	3.68876	4.25157
EVM0009375	8.78192	7.41948	5.92415	7.37518	6.47241	8.15332	7.14594	7.25722	2.28859	1.8282	0.969813	1.69553	0.942454	1.94667	1.21988	1.36967	2.85333	3.23689	2.90119	2.99714	6.99483	5.71016	8.25558	6.98686	5.00367	4.56227	3.2615	4.27581	2.46555	1.9174	1.32087	1.90128	1.71061	2.64512	1.81022	2.05532	0.533851	1.38589	0.501032	0.806923
EVM0009377	8.48721	6.01345	7.49833	7.333	8.57992	8.20725	8.50159	8.42959	16.117	16.2929	14.1219	15.5106	10.1546	9.64954	11.1396	10.3146	11.3697	10.2913	11.5686	11.0765	7.85645	7.1719	7.70456	7.57764	7.32238	7.4375	6.43741	7.06576	13.4128	14.3734	14.2753	14.0205	9.79624	11.7714	9.08112	10.2163	7.33709	9.27659	9.8036	8.80576
EVM0001429	9.69148	9.47044	8.89015	9.35069	7.82278	6.5788	6.79388	7.06515	10.0725	10.3362	8.84698	9.75189	49.7896	48.8551	47.7925	48.8124	25.3881	24.807	24.4347	24.8766	13.4196	11.8543	14.6061	13.2933	11.9522	13.3571	12.373	12.5608	17.4853	17.4361	17.6686	17.53	57.6227	59.353	59.5732	58.8496	51.8395	52.0405	53.4222	52.4341
EVM0001425	0.912602	0.509039	0.908098	0.77658	0.460372	0.384364	0.860193	0.56831	0.82086	0.384191	0.545277	0.583443	0.436639	0.554888	0.829839	0.607122	0.508399	0.222089	0.472964	0.401151	0.456411	0.34174	0.442647	0.413599	0.111523	0.232933	0.237712	0.194056	0.200002	0.376824	0.283604	0.28681	0.391858	0.28917	0.234725	0.305251	0.604095	0.869148	0.461579	0.644941
EVM0001424	43.0663	47.561	45.0995	45.2423	50.6822	54.8455	46.319	50.6156	23.9615	24.6439	22.8054	23.8036	24.3638	27.037	23.1382	24.8463	40.0113	40.8688	42.5505	41.1435	53.487	51.6032	51.586	52.2254	57.3145	53.819	53.3356	54.823	31.4833	34.1721	34.7807	33.4787	36.8696	31.7699	31.847	33.4955	42.1431	40.0713	43.402	41.8722
EVM0051806	0.953652	0.767917	1.25041	0.99066	0.753763	0.615077	0.229518	0.532786	0.992922	1.24323	2.10448	1.44688	1.71099	1.52546	1.97936	1.7386	2.58662	1.74235	1.60681	1.9786	2.04106	1.71257	3.12079	2.29147	0.553251	1.05558	0.722489	0.777106	1.87789	3.04696	2.81567	2.58017	1.91293	2.53282	1.84937	2.09837	3.79929	3.75857	2.63546	3.39778
EVM0014229	1.13748	0.947097	1.17993	1.08817	1.57383	1.32083	1.43745	1.44404	1.22854	0.970711	1.15892	1.11939	4.00535	4.0127	3.89271	3.97025	3.2451	3.21951	3.03746	3.16736	1.40457	1.5423	1.21652	1.3878	1.93038	1.83626	1.93992	1.90219	1.50957	1.64039	1.89176	1.68058	2.01042	2.22202	2.31748	2.18331	1.57984	2.05449	1.95016	1.8615
EVM0014220	3.32288	3.8543	3.30871	3.4953	2.80617	2.85592	2.02723	2.56311	1.12952	1.15011	1.70254	1.32739	0.600232	0.656713	0.217637	0.491527	0.812291	1.74005	1.51738	1.35658	2.85965	2.75617	2.52843	2.71475	3.30009	3.87994	3.54749	3.57584	2.74393	2.47384	1.80084	2.33954	0.90202	1.81147	1.07113	1.26154	2.22093	2.34711	2.05873	2.20892
EVM0014223	40.1162	35.6616	36.903	37.5603	26.0529	25.9273	27.1266	26.369	27.4316	25.6348	27.707	26.9245	38.5582	37.7705	37.6536	37.9941	63.552	67.3144	65.8466	65.571	37.5477	36.6075	41.5028	38.5527	21.6217	22.216	22.2115	22.0164	29.8627	35.0865	33.9247	32.958	34.2324	34.4834	28.6621	32.4593	38.7206	42.4918	38.3633	39.8586
EVM0015173	3.30755	2.73575	2.68547	2.90959	2.40465	1.70377	2.55671	2.22171	1.4893	1.70698	1.04798	1.41475	0.247987	0.668907	0.955358	0.624084	0.982137	1.46996	0.311745	0.92128	3.18768	3.10443	2.04838	2.78017	1.57158	1.15668	1.25645	1.32824	1.51262	0.893894	1.01289	1.1398	0.703213	1.28588	1.28402	1.09104	1.29828	1.07976	2.42313	1.60039
EVM0015176	2.76275	2.83414	3.246	2.94763	3.90867	4.03557	3.33289	3.75904	4.00221	3.78515	4.26708	4.01814	5.49389	6.06255	6.10203	5.88616	5.62797	5.36916	6.72816	5.90843	5.97453	4.93736	5.87322	5.59504	6.08168	6.51825	6.51279	6.37091	5.69808	5.88956	6.19976	5.92913	6.77144	6.44647	7.76541	6.99444	7.71953	8.32401	7.5077	7.85041
EVM0015177	11.4652	10.8098	12.2753	11.5168	21.1969	22.503	22.3193	22.0064	10.7013	10.1813	13.246	11.3762	39.0412	39.7693	38.784	39.1982	27.9134	27.4284	29.3901	28.244	4.876	5.55431	5.935	5.4551	10.8705	11.5418	11.0664	11.1596	5.04963	5.09713	4.40554	4.85077	7.55052	9.03556	8.63608	8.40739	8.76399	7.49855	8.13493	8.13249
EVM0015175	10.5522	9.50283	10.1803	10.0784	6.30259	6.61364	6.07134	6.32919	6.0681	5.61405	5.72623	5.80279	8.3447	9.03793	8.37274	8.58513	21.0856	20.7256	20.8829	20.898	8.56709	6.55687	7.46815	7.5307	4.07231	3.57016	2.81709	3.48652	3.06705	3.90949	3.98525	3.65393	13.8273	13.7736	13.297	13.6326	17.192	17.0734	15.5098	16.5917
EVM0015178	40.0273	41.5014	40.9631	40.8306	34.3144	33.7599	34.4658	34.18	29.8839	29.7706	31.017	30.2239	22.8251	24.0818	23.6266	23.5112	27.8028	27.0347	26.4449	27.0941	31.686	32.1938	32.7712	32.217	16.6167	15.8279	15.8777	16.1074	16.6188	17.079	17.1761	16.9579	14.1506	14.769	14.0654	14.3283	14.8097	13.515	14.6317	14.3188
Salix_babylonica_newGene_3982	1.43984	1.62972	1.88041	1.64999	1.39998	0.769147	0.889196	1.01944	1.12039	1.51435	1.89777	1.51084	1.36385	1.6727	1.69076	1.57577	2.01651	2.92424	2.38956	2.44343	0.092649	0.27205	0.160814	0.175171	0.18058	0.133576	0.101453	0.138536	0.100272	0.114531	0.151847	0.122217	0.074201	0.089681	0.164817	0.109566	0.331123	0.017219	0.016884	0.121742
EVM0001393	0.52764	0.615051	0.70741	0.6167	0.256732	0.207462	0.168526	0.210907	0.16639	0.251611	0.289943	0.235981	0.031991	0.064376	0.143346	0.0799043	0.242125	0.123141	0.151067	0.172111	0.767129	0.405516	0.508634	0.560426	0.321628	0.300523	0.275231	0.299127	0.352641	0.300985	0.178903	0.27751	0.104914	0.149371	0.100621	0.118302	0.138691	0.245684	0.297706	0.22736
EVM0006813	2.69897	3.03	2.78257	2.83718	3.08928	3.21951	4.1266	3.47846	2.40499	2.23831	2.58352	2.40894	1.11154	1.6613	1.12223	1.29836	2.43022	1.92587	2.55354	2.30321	1.72308	2.87242	1.69436	2.09662	2.44401	1.7355	3.64396	2.60783	2.53542	3.01475	2.82359	2.79126	2.24193	1.62565	0.888689	1.58542	1.4905	1.84787	1.11235	1.48357
EVM0006812	1.21042	1.70727	0.869383	1.26236	2.15707	2.47567	2.12352	2.25209	1.55447	2.07704	1.2924	1.6413	2.00111	3.08162	2.12164	2.40145	2.33655	2.46812	2.72957	2.51141	0.660639	0.761104	0.571734	0.664492	2.26973	2.85517	2.66426	2.59639	2.20213	2.52134	1.80928	2.17758	5.06187	4.67635	4.25922	4.66582	4.40554	5.81802	4.52794	4.91716
EVM0003520	11.1779	12.0119	9.62026	10.9367	6.39463	5.68533	5.69793	5.92596	1.84591	1.78431	1.61973	1.74998	1.17062	1.02231	0.72841	0.97378	2.34369	1.7092	1.77961	1.94416	5.47703	4.76948	5.32227	5.18959	12.3175	13.9815	11.6372	12.6454	3.31919	3.03766	3.50893	3.28859	0.975439	2.06497	1.36197	1.46746	2.35997	2.82008	2.60492	2.59499
EVM0006816	0.070657	0.12423	0.205985	0.133624	0.172464	0	0.160856	0.111107	0.249731	0.038135	0.131806	0.139891	0.206118	0.091779	0.027709	0.108535	0.188629	0.241092	0.21185	0.213857	0.62366	0.749391	0.502934	0.625328	0.320679	0.559512	0.203672	0.361288	0.46092	0.994495	0.707589	0.721001	0.089745	0.73436	0.223991	0.349365	0.594344	0.187145	0.408429	0.396639
EVM0001397	3.96709	4.167	3.72004	3.95138	3.70777	3.26155	5.19062	4.05331	4.08147	3.40673	4.41359	3.96727	1.59428	1.36803	2.23003	1.73078	2.98666	3.14091	3.12177	3.08311	3.03171	3.1723	2.47977	2.89459	2.9484	2.3311	2.00027	2.42659	5.87135	5.98048	5.2524	5.70141	1.66348	1.75119	1.73762	1.71743	2.44963	1.98658	1.95484	2.13035
EVM0014595	5.29521	6.24287	4.96413	5.50074	3.15115	3.28996	3.05179	3.1643	3.2051	3.30506	2.81908	3.10975	2.9584	3.80457	1.96317	2.90871	3.17586	3.90673	3.51453	3.53237	5.12262	5.38929	6.24009	5.584	11.9558	10.0715	9.60734	10.5449	13.276	12.8505	12.1678	12.7647	9.6129	8.98249	9.46158	9.35232	14.7545	15.8711	13.4842	14.7033
EVM0032309	0.569427	0.776703	0.666259	0.670796	0.849286	0.647934	0.999647	0.832289	0.93658	0.783632	0.401971	0.707394	0.328166	0.429626	0.383079	0.38029	0.366795	0.390533	0.274287	0.343872	1.34553	1.30498	1.11732	1.25595	1.08761	1.04855	1.3722	1.16945	1.7245	1.17832	2.06471	1.65584	0.663093	0.770146	0.46289	0.632043	0.927042	0.600539	0.714532	0.747371
EVM0014593	9.73367	10.1774	9.55003	9.82035	42.1031	38.304	39.5194	39.9755	6.34836	8.31095	6.92507	7.19479	12.5436	10.5516	12.9965	12.0306	13.5735	14.3151	13.064	13.6508	3.24858	3.89069	2.97846	3.37258	2.57814	2.83589	2.19262	2.53555	2.22563	2.20691	2.42909	2.28721	1.68236	1.57555	2.55036	1.93609	1.20806	1.68675	2.0962	1.66367
EVM0014591	21.1252	26.6136	24.0067	23.9152	11.4642	13.418	12.9006	12.5943	9.23657	11.1175	11.921	10.7584	5.48292	4.77797	5.27963	5.18017	5.9906	8.14585	6.53531	6.89059	18.4061	16.2587	18.8991	17.8547	10.2642	10.2987	9.04354	9.86879	7.76646	6.91498	7.60572	7.42905	6.47676	6.30877	4.2697	5.68508	7.2707	7.02813	9.38361	7.89415
EVM0032300	0.816295	0.946979	0.857876	0.873717	0.378024	0.212392	0.42935	0.339922	0.119024	0.128409	0.294123	0.180519	0.055754	0	0	0.0185847	0.231386	0.427878	0.12285	0.260705	0.453978	1.33275	0.799888	0.862204	0.69909	1.04179	0.694984	0.811956	1.13558	1.15323	1.42098	1.2366	0.623293	0.253474	0.968883	0.615217	0.584035	0.081704	0.627056	0.430932
EVM0009598	1.4175	1.27846	1.42046	1.37214	1.46673	1.11076	1.59788	1.39179	0.591166	0.800633	0.638469	0.676756	0.62996	0.627894	0.587049	0.614968	0.708549	0.915397	0.990857	0.871601	1.53794	1.18785	1.52031	1.41537	0.923238	1.00009	0.715424	0.879583	0.789016	0.820533	0.663074	0.757541	0.655839	0.501831	0.338518	0.498729	0.720203	0.959685	0.609728	0.763205
EVM0009593	2.12034	2.75976	2.90803	2.59605	0.63953	0.551074	0.35449	0.515031	0.504297	0.089374	0.396095	0.329922	0.107156	0	0	0.0357187	0.729416	0.997293	0.684459	0.803723	2.93978	4.08954	3.98811	3.67248	0.610004	1.17409	0.960525	0.914874	0.666926	0.631496	0.578379	0.6256	0.624777	0.569346	0.477429	0.557184	0.945599	1.52232	0.773669	1.08053
EVM0009592	2.8677	2.11669	1.80973	2.26471	0.38758	1.15684	0.572988	0.705803	0.95666	0.776296	1.68611	1.13969	0.839601	0.734492	0.687324	0.753806	1.42935	0.40549	0.229474	0.688104	1.32916	0.499758	0.510633	0.779852	0.307725	1.1219	0.104588	0.511406	0.26968	0.094601	0.225899	0.196727	0.149093	0.310402	0.101611	0.187035	0.103661	0.273542	0.564816	0.314006
EVM0009597	0.409606	0.266536	0.439745	0.371962	0.317495	0.265216	0.210161	0.264291	0.625805	0	0.650922	0.425576	0.44818	0.351533	0.676712	0.492142	0.678138	0.222634	0.609733	0.503502	1.27927	1.086	1.03917	1.13481	1.14194	1.29058	0.820414	1.08431	1.00017	1.62368	1.50474	1.3762	0.867735	1.23863	1.28513	1.1305	1.14271	0.974769	0.876432	0.99797
EVM0007636	13.8526	13.4364	13.1089	13.4659	11.773	10.7651	13.0969	11.8783	19.1467	21.4489	19.3304	19.9753	28.6844	23.4621	24.0315	25.3926	20.7306	23.8904	21.0741	21.8984	6.46763	9.02429	7.98713	7.82635	6.60582	6.97149	6.87805	6.81845	8.61508	7.56741	9.56052	8.58101	11.3023	12.4679	12.6192	12.1298	11.442	11.2205	11.224	11.2955
EVM0030239	2.05736	1.56288	2.67933	2.09986	38.7346	36.2918	33.3435	36.1233	12.6736	11.963	11.6687	12.1018	4.7581	5.55447	5.89194	5.4015	3.34009	4.28231	3.24183	3.62141	2.82806	3.18833	3.68435	3.23358	26.7608	29.9829	27.7466	28.1634	30.1511	30.1492	30.8056	30.3687	6.52389	7.10404	4.75401	6.12731	5.24575	7.75598	5.80999	6.27057
EVM0030233	10.379	13.5068	13.7681	12.5513	8.39503	7.58984	7.54754	7.84414	7.29165	7.15452	6.85827	7.10148	2.90963	3.99631	3.04073	3.31556	5.4247	7.58361	6.15728	6.38853	22.5687	23.1331	21.8795	22.5271	6.72363	9.34352	7.42105	7.8294	5.18242	5.91399	5.4277	5.50804	4.57831	4.28478	5.04789	4.637	9.99291	11.623	11.3074	10.9744
EVM0008422	9.8443	9.46739	8.43427	9.24865	6.98806	5.84405	7.38871	6.74028	5.80342	6.6038	5.52395	5.97706	4.7719	4.65013	5.26108	4.89437	6.51902	6.54159	6.07392	6.37818	9.87584	10.0193	9.19811	9.69773	12.5241	11.391	12.5301	12.1484	10.1054	12.6659	11.9964	11.5893	19.2772	19.8332	19.7666	19.6257	18.2249	16.3863	14.8419	16.4844
EVM0008420	3.41741	4.1311	4.67123	4.07325	2.7482	2.95055	2.89346	2.86407	3.36703	3.34079	2.94389	3.21724	2.81401	2.50927	3.50333	2.9422	2.95205	3.00931	2.74645	2.90261	1.32387	1.53646	1.87513	1.57849	3.02667	2.17899	2.42066	2.54211	1.24677	1.23939	2.07738	1.52118	2.32362	2.10686	1.67288	2.03445	0.97838	2.25829	1.8119	1.68286
EVM0008421	1.02328	1.02913	0.941654	0.998021	0.340235	0.882768	0.829808	0.68427	0.216941	0.195917	0.705423	0.37276	0.225615	0.301869	0.678751	0.402078	1.02173	0.284922	0.248459	0.51837	0.338898	1.35108	1.02069	0.903556	0.760302	0.616647	0.427844	0.601598	0.291658	0.451128	0.425225	0.389337	0.718928	0.863839	0.228824	0.603864	0.223549	0.465282	0.394632	0.361154
EVM0008427	4.70971	5.19163	4.73251	4.87795	1.9818	2.19428	1.90969	2.02859	1.85849	1.62395	1.39991	1.62745	1.34419	1.48718	1.14519	1.32552	2.13922	1.11036	2.17515	1.80824	4.51168	5.67995	5.59758	5.26307	0.927801	1.9777	1.88892	1.59814	1.62521	2.12241	1.42411	1.72391	1.47481	2.29843	2.31284	2.0287	2.27425	2.19065	2.52539	2.3301
EVM0034345	56.3595	55.6911	56.117	56.0559	63.8944	67.2568	63.1614	64.7709	39.0047	41.1687	38.566	39.5798	26.892	28.3131	24.4315	26.5455	23.6191	22.9025	20.7655	22.429	37.9561	40.9719	41.7832	40.2371	35.5021	32.6108	35.9414	34.6848	26.3818	28.4747	27.9413	27.5993	32.1585	30.5006	32.1869	31.6154	23.4202	23.6925	24.3811	23.8313
EVM0008428	0.71505	1.03236	0.933329	0.89358	1.932	1.69438	2.41917	2.01518	1.70755	2.02512	2.06994	1.9342	0.560976	0.604714	0.735645	0.633778	0.645705	0.432494	0.767862	0.615354	0.389043	0.446128	0.487755	0.440975	1.31724	1.06138	1.68813	1.35558	1.55379	1.44675	1.37631	1.45895	0.651253	0.438525	0.738134	0.609304	0.67759	0.761899	0.582546	0.674012
EVM0043883	0.222539	0.050991	0.371042	0.214857	0.34693	0.22121	0.24304	0.270393	0.310955	0.316899	0.651679	0.426511	0.379849	0.429228	0.596546	0.468541	0.607532	0.666632	0.340463	0.538209	0.016563	0	0	0.005521	0	0	0	0	0	0	0.033848	0.0112827	0	0.015935	0	0.00531167	0	0.016859	0.031016	0.0159583
EVM0043882	4.88362	6.36993	4.98181	5.41179	4.26985	2.81674	3.24778	3.44479	5.70158	4.97251	5.16685	5.28031	6.6235	8.52204	6.29751	7.14768	6.24931	6.76374	6.20555	6.4062	9.20309	7.40406	8.47016	8.3591	6.42915	7.61844	6.83349	6.96036	8.64754	8.9651	8.82763	8.81342	10.507	9.52436	10.9344	10.3219	10.9162	11.9092	11.7149	11.5134
EVM0007630	20.2264	20.5947	20.5565	20.4592	31.6046	29.9418	31.5046	31.017	37.6483	39.0024	35.621	37.4239	36.3141	37.3657	36.1047	36.5948	30.806	29.9645	30.3899	30.3868	22.5763	21.2524	20.9155	21.5814	30.911	29.6965	29.1636	29.9237	31.5739	30.5874	31.4791	31.2135	31.0181	32.2265	29.3034	30.8493	30.7832	31.9519	31.1285	31.2878
EVM0043888	2.61932	2.72514	3.40563	2.9167	3.47872	2.59249	3.98717	3.3528	2.01729	1.82994	1.71987	1.8557	2.92248	2.70393	2.94244	2.85628	3.39286	2.72717	2.57094	2.89699	2.29791	2.22112	2.75855	2.42586	2.51281	2.5918	2.5076	2.53741	1.7794	1.32271	1.70097	1.60103	2.88652	3.63765	2.93648	3.15355	2.86047	2.73596	3.67272	3.08972
EVM0007631	2.41996	2.68717	2.13451	2.41388	1.36072	1.37085	1.42754	1.38637	0.127157	0.421818	0.46883	0.339268	0.621558	0.613426	0.444271	0.559752	0.859363	0.615005	0.82574	0.766703	2.92593	2.42657	2.34262	2.56504	1.34232	2.10794	1.54997	1.66674	0.847256	0.867663	0.837417	0.850779	0.90777	0.727682	0.669481	0.768311	1.12339	1.19188	1.28849	1.20125
EVM0001807	1.97705	1.83339	1.3348	1.71508	1.80241	0.957907	1.33162	1.36398	0.522015	0.80023	0.604692	0.642312	0.159898	0.151256	0.424313	0.245156	0.35063	0.907865	0.839628	0.699374	2.03553	1.80954	1.31673	1.7206	1.47115	1.20771	1.52491	1.40126	1.4144	1.26681	1.31367	1.33162	0.682123	1.06054	0.406818	0.716495	0.859496	0.919796	1.06242	0.947236
EVM0052951	18.5485	21.0109	18.5593	19.3729	17.6414	21.152	20.1854	19.6596	14.7207	11.9725	13.7813	13.4915	4.90281	5.13009	4.30464	4.77918	6.97504	6.31234	7.42819	6.90519	8.75238	7.90395	8.10909	8.25514	6.1171	7.06541	6.68124	6.62125	5.72961	5.71811	5.58798	5.67856	2.01432	2.70612	2.07208	2.26417	3.21262	3.82666	3.38564	3.47497
EVM0007490	3.03185	3.00583	3.16037	3.06602	3.31811	4.09334	3.47503	3.62882	0.816369	0.938996	0.740718	0.832028	2.56185	2.16778	3.04153	2.59039	2.88468	2.5689	2.9859	2.81316	5.21428	6.14547	5.98347	5.78107	6.22328	4.83554	5.99469	5.6845	1.63355	1.43807	1.47835	1.51665	3.89556	4.11803	3.92396	3.97918	5.28999	4.57634	4.47325	4.77986
EVM0022962	6.03577	5.76806	5.74914	5.85099	2.27056	1.73616	2.4211	2.1426	1.51222	1.21293	1.51485	1.41333	0.541509	0.682831	0.707822	0.644054	1.52522	1.64461	1.38527	1.51836	4.71527	5.08159	4.47748	4.75812	3.05896	1.78545	1.90426	2.24956	1.78873	3.01826	2.86183	2.55627	1.70571	1.75128	2.23113	1.89604	2.03104	2.38815	1.93651	2.11857
EVM0000447	8.36441	8.11363	8.43375	8.30393	4.44899	5.33205	6.48831	5.42311	4.49794	4.14929	5.17135	4.60619	2.32539	1.64591	2.35196	2.10775	4.51019	3.74665	3.83135	4.0294	11.6925	9.16146	11.2801	10.7113	5.83025	6.40698	5.31785	5.85169	9.28675	7.20901	6.79823	7.76466	3.11025	3.5848	2.74926	3.14811	4.96311	5.35184	4.87376	5.0629
EVM0056273	6.65203	6.89612	6.69508	6.74774	0.576934	1.11393	1.30479	0.998553	1.55753	1.19989	1.85912	1.53885	1.12319	1.3933	1.46922	1.32857	2.36237	1.68698	1.58733	1.8789	4.29779	4.29843	3.63827	4.07817	0.324319	0.441817	0.196196	0.320777	0.978031	1.25614	0.627198	0.95379	0.604698	0.554342	0.567025	0.575355	0.993494	0.910239	1.1378	1.01384
EVM0034347	364.253	347.365	368.669	360.096	578.498	571.305	572.661	574.155	265.424	265.458	270.174	267.019	102.925	103.303	103.47	103.233	181.546	188.084	180.968	183.533	415.096	416.757	427.484	419.779	489.216	472.553	496.299	486.022	425.222	442.038	435.847	434.369	210.768	210.55	210.311	210.543	170.799	168.955	177.083	172.279
Salix_babylonica_newGene_347	1.20596	1.57758	0.714553	1.16603	1.07132	0.821238	0.906015	0.932858	1.04911	1.07435	0.923082	1.01551	2.41825	0.897783	1.31744	1.54449	2.14376	1.9242	2.48039	2.18278	1.73449	1.73535	1.68982	1.71988	0.691158	0.94834	0.083521	0.57434	0.933033	0.59369	0.639034	0.721919	0.189377	0.561794	0.743452	0.498208	1.49888	1.28108	0.641228	1.1404
EVM0022964	18.7122	17.3845	18.1809	18.0925	7.32956	7.19673	8.94893	7.82507	3.16276	4.53916	3.55952	3.75381	7.96872	6.44433	8.28883	7.56729	14.5924	13.434	15.349	14.4585	14.6754	15.4386	17.211	15.775	7.05414	6.55427	6.93907	6.84916	7.3052	5.27525	5.85225	6.14423	9.06256	10.1583	8.51801	9.24628	12.6297	7.94298	8.73212	9.76827
EVM0057507	9.21995	7.756	8.19702	8.39099	4.42753	4.8984	3.36464	4.23019	7.62702	9.91649	8.53367	8.69239	17.8329	16.7456	14.7325	16.437	37.3194	40.9675	35.4655	37.9175	17.4611	18.5475	21.4318	19.1468	1.82377	2.72872	2.07626	2.20959	6.66404	8.68594	7.64906	7.66635	16.2841	14.7624	14.6981	15.2482	23.4562	20.6652	19.0459	21.0558
EVM0012335	56.1278	54.9266	58.6887	56.5811	41.3417	44.3314	39.3693	41.6808	36.4077	34.0051	33.7595	34.7241	39.9385	40.9983	39.4314	40.1227	36.0191	34.409	38.002	36.1434	17.8955	17.6058	19.4759	18.3258	15.6255	15.1906	15.9769	15.5976	10.8128	11.2475	9.63218	10.5641	12.7709	12.6708	12.8346	12.7588	14.3464	12.886	12.3921	13.2082
EVM0012334	7.74865	8.10455	6.24925	7.36748	4.36879	5.53401	6.24256	5.38179	4.78187	4.21758	3.81006	4.26984	2.82103	2.38585	2.94243	2.71644	3.29808	3.29415	4.08913	3.56045	7.93375	6.93049	7.2424	7.36888	5.69991	6.5697	6.12051	6.13004	5.60241	4.80165	5.62803	5.34403	3.37213	3.49158	3.67758	3.51376	4.14652	4.30028	4.32878	4.25853
EVM0012336	26.9566	40.7177	28.616	32.0968	14.2825	11.0657	12.0626	12.4703	10.5362	12.0251	12.8519	11.8044	14.6368	16.1122	13.4249	14.7246	7.32439	10.003	8.56272	8.63002	8.79648	7.53268	9.94437	8.75784	9.19282	12.5034	10.4268	10.7076	7.00332	8.55506	6.70493	7.4211	5.96572	4.78711	5.39684	5.38322	8.32606	4.38767	5.17598	5.96324
EVM0012330	3.69324	4.09308	2.81621	3.53418	3.57688	3.68067	2.33512	3.19756	3.30929	2.52255	3.8071	3.21298	2.73325	2.34263	1.41987	2.16525	2.35184	2.62372	1.80142	2.25899	4.28432	4.16237	5.00467	4.48378	5.4892	5.29393	6.26557	5.6829	4.67911	5.36385	7.2574	5.76679	4.09226	4.48197	4.79739	4.45721	5.15221	5.15393	4.3789	4.89502
EVM0012333	0.740676	1.70499	1.08853	1.17807	0.555653	0.867185	0.99264	0.805159	0.443519	0.570687	0.415102	0.476436	0.322282	0.583259	0.926684	0.610742	0.595689	0.65313	0.769	0.672606	0.849583	1.30492	1.58635	1.24695	1.34686	0.887776	0.941468	1.0587	2.10264	1.36346	1.67323	1.71311	1.04397	0.939122	1.14355	1.04221	1.37775	1.09452	0.994061	1.15545
EVM0050208	2.46265	1.93758	1.5538	1.98468	1.94621	2.19759	1.08118	1.74166	1.6245	2.08841	1.70023	1.80438	0.962033	1.13184	0.822407	0.972092	1.54471	1.43244	1.22249	1.39988	3.06955	2.00299	2.24022	2.43759	3.12026	2.38686	3.00502	2.83738	3.47704	3.17376	4.40093	3.68391	3.45646	3.67507	3.46046	3.53066	3.5899	1.82445	3.03338	2.81591
EVM0002240	1.41529	1.81448	1.91102	1.7136	0.02811	0.114262	0.077558	0.07331	0.259768	0.308504	0.024591	0.197621	0	0.291471	0.078394	0.123288	0	0	0.034135	0.0113783	1.3793	0.716883	0.924725	1.00697	0.127143	0.040374	0	0.055839	0	0	0	0	0	0	0.029548	0.00984933	0.033798	0.178603	0	0.0708003
EVM0056162	1.76718	1.13586	1.13768	1.34691	0.262664	0.221479	0.220138	0.23476	2.02815	2.49754	1.72933	2.08501	1.07796	0.700764	0.597396	0.792039	1.07666	1.11261	1.09747	1.09558	2.27699	2.09596	2.22679	2.19991	0.173091	0.112297	0.354323	0.213237	0.478099	0.669653	0.526896	0.558216	0.801551	0.693711	0.389816	0.628359	0.915989	0.857716	1.33451	1.03607
EVM0002246	8.06794	6.18959	6.46265	6.90673	4.08128	3.86416	3.46825	3.80456	2.04085	2.33638	2.41578	2.26434	1.52298	1.27631	1.23714	1.34548	2.49042	2.06025	1.77919	2.10995	5.97194	6.52426	7.18844	6.56155	4.1609	3.98042	3.54885	3.89672	2.72547	4.07646	3.39333	3.39842	1.37122	3.46431	2.41863	2.41806	2.70331	2.3217	1.93454	2.31985
EVM0056168	8.70031	8.96524	7.00291	8.22282	4.69234	4.59294	4.60785	4.63104	5.34433	6.65278	4.95863	5.65191	9.2819	9.91412	9.05819	9.41807	11.3469	12.4609	10.1064	11.3047	4.63687	4.39825	5.53737	4.8575	2.66527	2.13425	2.01045	2.26999	4.25201	5.06163	3.77159	4.36174	5.93379	5.24055	4.72785	5.30073	5.66409	5.07254	5.98707	5.57456
EVM0056169	14.1821	12.0445	11.3272	12.5179	6.07942	5.66027	6.36376	6.03448	10.1972	12.8781	11.7228	11.5994	11.6337	11.0769	9.92403	10.8782	9.65173	7.79812	6.35007	7.9333	17.598	16.2528	18.4334	17.4281	5.15381	6.58065	6.1475	5.96065	7.55067	10.0526	9.54518	9.04948	3.62004	3.16043	4.36285	3.71444	5.58853	6.73025	6.90509	6.40796
EVM0011069	2.12785	1.5134	1.80542	1.81556	1.90925	1.42407	1.20257	1.51196	2.02476	1.94942	1.72317	1.89912	1.76406	2.50697	2.4048	2.22528	1.91628	1.66731	1.9264	1.83666	4.0803	4.17631	3.80583	4.02081	2.04127	1.58937	2.23158	1.95407	3.47489	3.16887	2.26206	2.96861	1.84013	1.56014	1.59382	1.6647	2.62769	2.44734	1.5886	2.22121
EVM0005733	1.32588	0.999151	1.01155	1.1122	1.07782	0.890779	0.937515	0.968705	1.00408	1.20721	0.933511	1.04827	1.01349	0.843713	1.0624	0.973201	0.96519	0.945545	1.31862	1.07645	2.89786	2.44487	2.39136	2.57803	2.48525	2.08273	2.43187	2.33329	2.12649	2.4633	2.20152	2.26377	1.89034	1.80577	1.59737	1.76449	1.8527	2.35254	2.06218	2.08914
EVM0005736	1.27369	1.18874	1.41745	1.29329	1.90591	1.48329	1.8555	1.74823	2.55514	1.75313	1.41716	1.90848	0.931095	1.37218	0.78197	1.02842	1.33494	0.742416	1.41593	1.16443	1.90337	1.66849	0.964672	1.51218	1.186	1.70105	1.44745	1.44483	2.53947	2.88869	2.61153	2.6799	0.887557	1.2076	0.485369	0.860176	1.24562	1.0409	1.19088	1.15914
EVM0005738	1.71152	1.39224	1.25978	1.45451	1.11142	1.74026	0.856603	1.23609	0.778072	0.956792	0.783633	0.839499	0.298628	0.193194	0.106391	0.199404	0.322494	0.386924	0.44222	0.383879	0.286859	0.355932	0.436048	0.359613	0.288065	0.237166	0.14227	0.2225	0	0.369944	0.291689	0.220544	0	0	0	0	0.134631	0.06908	0.113293	0.105668
Salix_babylonica_newGene_2497	2.22115	2.06338	2.75284	2.34579	1.76049	1.44708	0.920904	1.37616	3.32413	2.19228	1.7501	2.42217	3.32984	1.92775	1.78068	2.34609	1.35398	1.61265	2.19899	1.72188	0.364437	0.081767	0.078458	0.174887	0.190509	0.088153	0.071053	0.116572	0.163613	0.107792	0.05727	0.109558	0.138175	0.054547	0.020377	0.071033	0.120586	0.06433	0.111288	0.0987347
EVM0021792	0	0	0	0	0	0	0	0	0	0	0	0	0	0	0	0	0	0	0	0	0.052444	0.479042	0.441411	0.324299	1.16627	1.03257	1.28329	1.16071	0.114797	0.549048	0.287742	0.317196	0.174837	0	0.052904	0.0759137	0.290524	0.101192	0	0.130572
EVM0049229	14.679	11.596	13.6949	13.3233	14.0782	13.9733	14.5367	14.1961	9.71453	11.3564	9.24778	10.1062	7.82237	9.04435	9.35835	8.74169	12.13	11.08	10.6442	11.2847	8.29306	12.3993	11.1073	10.5999	33.8993	30.2764	29.6019	31.2592	37.416	35.214	35.0448	35.8916	26.2106	25.7498	26.0199	25.9934	37.6563	39.297	38.5178	38.4904
EVM0049228	12.6418	13.0113	14.8086	13.4873	19.0463	15.0964	16.3747	16.8392	10.1959	10.0806	10.6038	10.2935	18.8691	17.4469	19.8355	18.7172	15.4383	15.4821	14.982	15.3008	10.1745	10.4334	10.1539	10.2539	18.1136	19.1782	21.1848	19.4922	10.2447	10.8403	11.2241	10.7697	22.045	21.0325	21.9918	21.6897	18.1624	19.2917	17.2557	18.2366
Salix_babylonica_newGene_10579	0.095527	0.382	0.144361	0.207296	1.09872	1.12484	0.666446	0.963334	0.266148	0.330095	0.870583	0.488942	0.181474	0.055636	0.055425	0.0975117	0.374703	1.12139	0	0.498698	0.160951	0.658151	0.679414	0.499505	1.17723	1.55017	1.04017	1.25586	3.096	1.71026	3.0621	2.62279	0.63766	0.153813	0.212359	0.334611	0.525986	0.932409	0.859418	0.772604
Salix_babylonica_newGene_7048	0.45158	1.22318	1.6904	1.12172	1.19017	0.970351	1.43301	1.19784	1.29903	1.23356	0.684278	1.07229	2.36017	1.78292	3.57612	2.57307	2.2427	1.88081	2.09132	2.07161	3.9355	2.91088	2.72079	3.18906	4.89768	4.73893	8.95708	6.1979	2.56202	2.52368	2.21917	2.43495	3.95831	2.95182	4.20825	3.70613	2.85232	3.66037	5.37917	3.96395
EVM0007395	5.92437	4.91179	5.31542	5.38386	5.44086	5.00979	5.31515	5.25527	8.45451	6.91395	5.52928	6.96591	8.29011	9.28739	8.405	8.66083	9.0727	9.92513	9.06521	9.35434	2.84539	2.64571	2.94371	2.8116	2.56717	2.93752	1.95723	2.48731	4.21745	3.11499	2.53741	3.28995	3.96985	3.30689	3.24767	3.50814	3.27193	2.97137	3.47532	3.23954
EVM0007399	2.07814	2.12617	1.9041	2.03614	1.19086	1.60633	1.54762	1.44827	0.582606	0.66741	0.984682	0.744899	0.769111	0.73178	0.509509	0.670133	1.21054	1.27745	0.8697	1.11923	2.66624	1.35951	1.47567	1.83381	0.723535	0.950939	0.60596	0.760145	1.4121	1.94349	1.00057	1.45205	0.597859	0.316353	0.478403	0.464205	1.04005	0.391129	1.38107	0.937413
EVM0052390	29.2235	29.3197	29.8196	29.4543	29.162	30.3865	29.952	29.8335	21.3792	20.8845	21.141	21.1349	13.3539	11.2552	12.2174	12.2755	16.6889	14.7673	14.5051	15.3204	25.8694	24.3038	26.3295	25.5009	22.9342	22.5951	22.9461	22.8251	19.0521	20.6483	19.9098	19.8701	20.6914	18.166	18.8628	19.2401	15.0122	15.4932	15.7307	15.412
Salix_babylonica_newGene_7047	15.379	15.9969	16.7768	16.0509	7.31539	7.28472	8.3132	7.63777	10.0689	13.1036	12.1091	11.7605	16.7265	13.6569	14.1562	14.8466	16.8131	17.8167	17.8998	17.5099	14.1605	14.7263	16.1034	14.9968	5.55069	6.1908	6.20384	5.98177	15.3376	12.9858	10.798	13.0405	14.4758	14.5485	14.3417	14.4553	14.9601	17.4898	15.9737	16.1412
Salix_babylonica_newGene_6930	0	0	0	0	0	0	0	0	0	0	0	0	0	0	0	0	0	0	0	0	13.0178	17.9056	16.6883	15.8706	11.9307	12.8175	16.8318	13.86	17.2684	11.0322	12.2636	13.5214	22.5402	5.3611	10.9632	12.9548	8.57529	20.5109	14.6656	14.5839
EVM0048268	3.90643	4.91515	3.71501	4.17886	2.80237	2.31348	2.1244	2.41342	2.85269	1.62739	0.998734	1.82627	0.451856	0.721352	0.601733	0.591647	1.41226	1.11401	0.762929	1.0964	3.19993	2.92396	2.48095	2.86828	2.17908	2.23022	0.990331	1.79988	0.828159	1.77097	1.52912	1.37608	1.03984	0.763423	0.660544	0.821268	0.575548	0.768859	0.882584	0.74233
EVM0048269	9.45971	9.52702	8.19003	9.05892	22.817	19.5511	19.267	20.545	14.1938	15.0268	12.8655	14.0287	2.76858	2.91213	3.20989	2.96353	5.02075	5.28268	4.6095	4.97098	13.2555	14.9068	13.3218	13.828	20.2549	21.1813	19.3985	20.2782	16.4799	17.3496	17.3666	17.0654	5.55102	5.83593	6.19372	5.86022	5.87051	5.80339	5.82228	5.83206
EVM0048265	2.86225	3.09918	2.93267	2.9647	1.9962	3.34164	1.94144	2.42643	3.11723	3.41264	3.82722	3.45236	3.60229	4.06646	4.12421	3.93099	4.53583	5.25681	4.41667	4.73644	7.05755	6.54021	5.08648	6.22808	6.25899	5.97682	5.82996	6.02192	7.65472	8.90153	7.59151	8.04925	9.53087	9.53596	8.02673	9.03119	9.61371	10.4966	9.85935	9.98989
Salix_babylonica_newGene_6939	0.94783	0.582465	0.528674	0.686323	4.16122	3.72999	3.89216	3.92779	3.12773	3.0291	4.19965	3.45216	5.87527	3.49613	2.84315	4.07152	2.72678	2.5717	2.24907	2.51585	0.804235	1.46507	0.36212	0.87714	1.99001	0.962566	1.22219	1.39159	1.17566	1.3889	0.994341	1.1863	1.79371	1.93002	2.15556	1.95976	0.779289	2.51238	1.25182	1.5145
EVM0047438	1.91671	1.9081	1.38029	1.73503	2.13514	2.84041	2.23249	2.40268	2.2977	2.00259	1.38631	1.89554	1.84153	1.21818	0.896449	1.31872	0.918764	1.16104	1.66685	1.24888	0.236777	0.701757	0.337862	0.425465	0.939465	0.530337	0.376697	0.6155	0.414339	0.473335	0.895531	0.594402	0.087295	0.244108	0.190987	0.17413	0.622041	0.182731	0.308995	0.371256
EVM0047439	9.53564	9.04447	7.9249	8.835	8.70165	7.71273	8.64368	8.35269	4.83106	5.74655	4.91896	5.16552	4.3005	4.60321	4.25219	4.3853	4.55211	6.23522	5.83382	5.54038	10.0552	8.91016	8.79721	9.25419	8.2136	10.0795	9.06618	9.11974	8.91617	11.4939	10.0225	10.1442	9.70962	11.2927	9.05547	10.0193	11.1529	11.5901	9.80779	10.8503
EVM0047430	1.3799	1.70691	1.46638	1.51773	0.306641	0.320708	0.423151	0.350167	0.341746	0.210785	0.453026	0.335186	0.260066	0.238627	0.229689	0.242794	0.137207	0.239502	0.096059	0.157589	0.180622	0.345111	0.185329	0.237021	0.781024	1.10652	0.672579	0.853375	0.278134	0.171413	0.466212	0.305253	0.293225	0.622444	0.461032	0.4589	1.19194	1.19217	1.04915	1.14442
EVM0017177	0.724391	0.896741	1.42781	1.01631	0.685002	0.680835	0.988345	0.784727	1.00796	0.739427	0.916712	0.888033	0.45809	0.385007	0.431437	0.424845	0.434724	0.495194	0.715608	0.548509	1.45279	0.892678	1.24978	1.19841	0.415168	1.32258	0.757164	0.831636	0.279101	0.685867	0.46451	0.476493	0.585416	0.28207	0.502806	0.456764	0.619073	0.788442	0.743899	0.717138
Salix_babylonica_newGene_4897	0.861079	2.08494	1.34864	1.43155	1.01997	0.73408	0.608917	0.787656	0.581669	0.853115	1.03858	0.824454	1.53059	1.15968	1.18216	1.29081	2.48514	2.43821	2.21423	2.37919	1.05876	2.6625	0.98463	1.56863	0.887525	0.469547	1.31404	0.890372	1.01906	0.893149	0.727294	0.879834	1.91296	1.99678	1.14203	1.68392	2.00613	1.71724	1.04937	1.59091
EVM0013462	32.6897	32.07	36.8883	33.8827	26.0419	27.1762	27.9247	27.0476	38.6868	40.0988	42.6699	40.4852	54.6008	50.4446	53.6909	52.9121	49.6564	49.6571	52.6441	50.6525	43.7653	43.7707	45.0711	44.2024	33.2255	30.6862	32.3407	32.0841	44.8345	41.441	43.8013	43.3589	49.9889	47.2211	49.342	48.8507	49.4673	49.6097	51.7196	50.2655
EVM0013467	1.7543	1.81253	1.26977	1.6122	0.93975	1.05507	0.644683	0.879834	0.737159	0.442426	0.770461	0.650015	0.059747	0.762394	0.120938	0.31436	0.349871	0.395699	0.551826	0.432465	2.4598	1.94852	2.74032	2.38288	1.51842	1.97326	1.18021	1.5573	1.14443	1.78494	1.88246	1.60394	0.337856	0.272364	0.802934	0.471051	0.455227	0.793835	0.796531	0.681864
Salix_babylonica_newGene_4760	1.07598	1.35393	0.866459	1.09879	0.91808	1.44683	0.954034	1.10631	1.33582	0.772826	1.17537	1.09467	1.73926	1.85912	1.80303	1.80047	1.41174	2.41636	1.82403	1.88404	1.89164	2.0301	2.42572	2.11582	1.21758	1.14123	0.93558	1.09813	1.34608	1.95035	1.12653	1.47432	2.42425	1.50162	1.36114	1.76234	2.22361	2.6962	2.14194	2.35391
EVM0027752	31.4891	40.052	37.5695	36.3702	31.6569	31.101	30.4707	31.0762	16.0951	17.7352	17.9525	17.261	14.8096	13.642	15.8211	14.7576	25.212	23.743	21.6043	23.5198	20.538	20.6881	21.0321	20.7528	19.7329	17.1272	15.9896	17.6166	10.5095	12.8744	12.4574	11.9471	5.41306	4.77124	5.73021	5.30484	6.33857	6.82994	6.3154	6.49464
EVM0027755	0.752968	0.749205	0.91821	0.806794	1.41852	1.47936	1.50119	1.46635	1.6279	1.65189	1.47971	1.5865	2.39977	2.2333	2.63913	2.42407	2.07294	1.9559	2.12379	2.05087	1.73623	2.31013	1.58565	1.87734	1.75082	1.81849	1.69256	1.75396	1.47745	1.7319	2.07933	1.76289	2.81477	3.57034	3.22624	3.20378	2.00768	2.24479	1.92227	2.05825
EVM0027759	45.1476	44.7328	43.3296	44.4033	72.788	68.4503	71.7492	70.9958	36.5333	42.0168	36.4337	38.3279	15.9802	14.7607	14.3215	15.0208	18.4289	17.3075	15.6341	17.1235	25.061	22.3256	24.85	24.0789	26.7632	25.8874	22.8426	25.1644	17.162	17.2738	17.4061	17.2807	15.1428	16.583	15.4021	15.7093	14.9397	14.2428	14.22	14.4675
EVM0016524	1.61524	1.59322	1.40092	1.53646	1.88829	1.8446	0.929336	1.55408	2.43227	1.76127	2.25563	2.14972	2.10607	2.05541	2.33144	2.1643	2.50935	1.91234	2.31508	2.24559	0.240822	1.29097	1.30791	0.946569	0.316186	0.623709	1.26297	0.734287	0.389384	0.21025	0.699477	0.433037	0.866296	1.02833	0.599867	0.831498	1.34072	1.2161	0.426277	0.994367
EVM0006045	0.268509	0.80376	0.396923	0.489731	0.805572	0.972401	0.79769	0.858554	0.475203	1.12822	1.19707	0.933496	1.09331	1.17286	2.68036	1.64884	0.522773	0.337617	0.662915	0.507768	1.28606	0.752822	0.976205	1.00503	2.04102	3.42035	3.74905	3.07014	1.63659	2.7599	1.82388	2.07346	1.32564	1.78418	1.87689	1.66224	2.05294	1.59575	1.97223	1.87364
EVM0006040	21.3824	22.2527	22.068	21.9011	25.1833	26.0245	26.6548	25.9542	14.5723	15.5777	15.3824	15.1775	6.71261	6.09211	7.02646	6.61039	6.99984	6.45024	6.67666	6.70891	14.9883	13.3285	14.413	14.2433	18.068	19.7059	20.1721	19.3153	12.9962	14.4005	12.1331	13.1766	7.87905	8.45115	7.57177	7.96732	7.24411	8.05129	6.43295	7.24278
EVM0053440	5.26388	5.36328	5.71045	5.44587	1.46823	1.81147	1.9178	1.7325	1.04101	1.66774	1.84554	1.5181	0.85807	1.30149	0.800918	0.986826	1.14405	1.43399	0.949221	1.17575	2.18115	2.07328	1.7545	2.00298	0.980261	1.71928	1.0931	1.26421	0.831211	0.991013	0.965093	0.929106	0.875947	0.91619	1.03384	0.941991	0.856601	1.18475	0.746272	0.929208
EVM0053441	5.09108	4.92347	5.1292	5.04791	4.43086	5.45795	5.3268	5.07187	5.82289	6.36767	5.19877	5.79645	6.75621	6.00279	5.51013	6.08971	6.87316	5.07207	5.39831	5.78118	11.4836	10.2816	9.78556	10.5169	6.46718	6.61222	6.49464	6.52468	9.87972	10.4396	9.42082	9.91338	15.0655	14.5628	14.5261	14.7181	10.7505	11.9935	12.4767	11.7402
EVM0053442	11.5303	11.1897	12.358	11.6927	10.2608	10.4935	11.2775	10.6773	6.09556	7.49938	6.50805	6.701	4.11234	4.20607	4.97008	4.4295	5.87482	5.21867	6.19543	5.76297	8.35624	9.94543	9.6441	9.31526	10.0344	9.96198	10.4721	10.1562	7.86095	8.61749	7.55747	8.01197	6.01817	5.91348	6.22023	6.05063	7.44429	6.99834	6.29513	6.91258
EVM0053443	7.63718	6.47752	5.64114	6.58528	1.77535	2.06146	1.57651	1.80444	1.17226	1.08283	1.59539	1.28349	1.13443	0.424559	1.237	0.931994	1.16117	1.38803	1.11804	1.22241	5.81156	4.77945	6.03559	5.5422	1.35183	0.949725	2.05679	1.45278	1.85628	1.88522	0.977575	1.57303	1.06969	0.726562	0.99232	0.929525	0.983712	1.63005	1.81642	1.47673
EVM0016528	10.1294	7.61998	9.29138	9.01358	5.45709	5.66078	5.69316	5.60368	7.25776	10.5915	7.93844	8.5959	17.9176	11.494	9.73758	13.0497	10.2621	7.46048	10.5626	9.4284	4.73253	4.49895	4.43224	4.55457	4.15108	2.92504	2.24081	3.10564	4.42532	4.0603	3.20497	3.89686	9.52921	12.4554	6.48372	9.48946	6.21171	6.90742	6.35501	6.49138
EVM0053445	0.789672	0.802139	0.431598	0.67447	0.770281	0.698698	0.420822	0.629934	0.390984	0.382773	0.254432	0.34273	0.174199	0.143957	0.158517	0.158891	0.416441	0.26455	0.217015	0.299335	1.0598	0.839117	1.00013	0.96635	0.729484	1.54944	0.813056	1.03066	0.450777	0.864106	0.900688	0.738524	0.45226	0.506995	0.447289	0.468848	0.399667	0.520752	0.399843	0.440087
EVM0006049	1.13017	0.652013	0.867401	0.883194	0.791142	0.616272	0.936785	0.7814	2.59303	2.17537	2.43322	2.40054	1.30517	1.41095	1.8428	1.51964	1.9243	1.53686	1.93753	1.79956	0.971613	1.67255	1.54168	1.39528	0.392288	0.509948	0.720995	0.541077	2.25601	2.31474	2.62989	2.40022	1.07657	1.09652	1.55625	1.24311	1.08848	1.79196	1.55566	1.4787
EVM0038153	0.095829	0.018032	0.240461	0.118107	0.141807	0.074491	0.106087	0.107462	0.124926	0.14896	0.059326	0.111071	0	0	0.058522	0.0195073	0.244706	0.230231	0.064575	0.179837	0.420378	0.394141	0.321857	0.378792	0.105529	0.124763	0.140106	0.123466	0.088553	0.225234	0.267362	0.193716	0.173253	0.189437	0.209441	0.19071	0.182963	0.267162	0.319151	0.256425
EVM0020905	1.56077	1.92092	1.29691	1.59287	1.40237	1.73205	1.4992	1.54454	1.02151	0.968934	0.953848	0.98143	0.587503	0.40202	0.414389	0.467971	0.749151	1.68631	0.627653	1.02104	0.524192	1.24839	1.31951	1.0307	1.31403	0.574748	0.732796	0.873857	0.455184	0.587665	0.725528	0.589459	0.315804	0.073166	0.189202	0.192724	0.400939	0.584948	0.377444	0.454444
EVM0014968	28.1649	32.6904	30.421	30.4254	22.6779	21.5896	20.1473	21.4716	13.5425	13.7446	13.6164	13.6345	8.5038	10.8297	10.4945	9.94266	16.6164	16.4808	15.9144	16.3372	43.416	39.7919	41.6177	41.6086	20.9334	21.7121	19.2008	20.6154	17.3029	20.093	17.5113	18.3024	11.076	12.8263	11.3186	11.7403	12.3374	12.0459	13.3328	12.5721
EVM0014969	11.7944	13.8196	13.7494	13.1211	12.2551	9.66497	9.82853	10.5829	10.3246	9.63588	9.66529	9.87527	6.13571	6.63892	6.01396	6.26286	15.5058	15.0498	15.0327	15.1961	7.99223	7.44771	7.25545	7.56513	31.9383	31.7052	34.2515	32.6317	77.7655	74.1567	74.7967	75.573	43.1807	45.1495	43.6177	43.9826	64.5998	69.4138	73.2791	69.0976
EVM0014966	2.30721	1.42683	1.54767	1.76057	0.851625	0	1.20138	0.684334	1.57143	1.34535	1.14153	1.35277	0.669051	1.1702	0.467637	0.768964	1.09342	1.15793	1.18352	1.14496	0.980974	1.34876	0.809046	1.04626	0.233265	0.713739	0.917112	0.621372	0.350461	0.189324	0.728812	0.422866	0.883692	0.382737	0.541236	0.602555	0.483251	0.348523	0.40661	0.412795
EVM0014967	0.692259	0.875449	0.738959	0.768889	1.15191	0.881395	1.24479	1.0927	0.995889	0.564669	1.08565	0.882069	0.563368	0.215966	0.577729	0.452354	0.244242	0.088435	0.233398	0.188692	0.269424	0.438853	0.793773	0.500683	0.827393	1.08968	0.674715	0.86393	0.871043	1.27412	1.30697	1.15071	0.380165	0.50055	0.683641	0.521452	0.59149	0.595835	0.280691	0.489339
EVM0014963	12.7325	12.3761	9.11643	11.4083	16.9673	14.2516	14.9708	15.3966	9.00984	6.73884	5.75746	7.16871	5.78733	6.67032	7.84627	6.76797	6.98648	7.30069	6.99088	7.09268	18.2864	15.9567	16.729	16.9907	38.0616	42.4439	30.9974	37.1676	25.7991	33.7776	35.9688	31.8485	14.6571	12.0525	11.4103	12.7066	9.48774	9.79267	9.20042	9.49361
EVM0052849	0.123368	0.356181	0.056344	0.178631	2.26705	2.16476	2.36215	2.26465	1.31481	1.36072	1.24206	1.30586	1.76369	1.47648	1.85904	1.69974	0.715553	0.834351	0.946514	0.832139	0	0.151548	0.172223	0.107924	1.57506	1.29035	1.34084	1.40208	1.17271	1.0971	0.953707	1.07451	1.32368	1.32636	1.60818	1.41941	0.787848	0.555996	0.831686	0.725177
EVM0004051	2.79691	2.70695	2.86977	2.79121	0.968015	1.23095	1.25063	1.14986	0.577864	1.42968	1.25278	1.08677	0.932827	1.24819	0.730616	0.970545	1.23428	0.871873	0.982427	1.02953	2.55294	2.08393	1.84201	2.15963	1.12105	0.767304	0.839039	0.909131	1.70754	1.17019	0.83367	1.23713	0.971645	1.02242	0.816441	0.936835	1.39922	1.37734	1.11862	1.29839
EVM0022220	8.54136	8.46621	7.42721	8.14493	1.84442	2.38076	2.51249	2.24589	3.47129	2.50077	2.85744	2.94317	3.72804	2.01434	2.26621	2.66953	4.38403	4.48919	3.96458	4.27927	5.33252	5.62268	5.41064	5.45528	1.52461	1.25996	1.62277	1.46911	3.06454	3.18056	1.89816	2.71442	2.65953	3.1273	3.61173	3.13285	3.5231	3.34735	2.6352	3.16855
EVM0022226	1.75522	1.84143	2.26505	1.9539	2.37248	2.08814	2.26719	2.2426	2.52591	2.91213	3.00359	2.81387	3.57576	3.40953	3.50838	3.49789	2.99028	3.13724	2.87787	3.0018	1.7383	1.37154	2.321	1.81028	2.35835	2.0215	1.81582	2.06522	2.26328	2.21176	2.28252	2.25252	3.25467	3.18635	3.25652	3.23251	3.28366	2.63931	3.21521	3.04606
EVM0022228	10.7813	12.5674	11.5546	11.6344	57.0083	57.7282	53.3417	56.0261	22.2269	21.9342	23.4274	22.5295	9.19486	8.65358	8.23417	8.69421	11.3472	11.8035	11.2922	11.481	11.2721	11.0786	11.3255	11.2254	40.8135	38.2778	40.7294	39.9402	15.8258	16.5212	15.7232	16.0234	11.0173	10.9325	10.0044	10.6514	9.12225	9.44718	8.85929	9.14291
Salix_babylonica_newGene_1645	2.07879	1.17187	2.42907	1.89324	1.68386	1.71017	1.66201	1.68535	1.69133	1.00971	1.31353	1.33819	2.79149	2.44149	1.32095	2.18465	2.44741	2.72093	3.09789	2.75541	2.24872	3.23082	2.83456	2.77137	1.08579	1.26466	1.12036	1.15694	2.0507	1.81953	1.64218	1.83747	1.82206	1.61197	1.42699	1.62034	4.10213	2.58929	2.88112	3.19085
EVM0037166	19.0838	15.9032	17.5908	17.5259	7.07926	7.38417	5.51873	6.66072	14.8219	13.8863	14.8521	14.5201	18.0566	19.9196	19.1497	19.0419	18.7992	17.9998	17.7963	18.1985	14.8764	13.4803	16.1054	14.8207	8.23748	7.58675	8.32283	8.04902	7.96032	9.59985	10.103	9.22107	15.5381	17.0026	15.8737	16.1381	16.427	14.2621	14.5396	15.0762
EVM0015509	10.5676	13.1094	9.51838	11.0651	13.4196	11.7225	13.6834	12.9418	12.3757	11.1101	10.6991	11.3949	6.92283	5.00043	5.54647	5.82325	5.5884	5.10991	5.63905	5.44579	11.1332	10.8522	11.6763	11.2206	12.5209	13.6281	12.3478	12.8323	13.1473	15.1363	14.5954	14.293	11.0965	10.0069	9.78612	10.2965	9.11301	6.46336	9.35678	8.31105
EVM0004638	0.360203	0.553522	0.452396	0.455374	0.794436	1.26226	1.00846	1.02172	0.292196	0.257351	0.349083	0.299543	0.179215	0.0302	0.061211	0.0902087	0.502934	0.695886	0.667878	0.622233	0.232978	0	0	0.0776593	2.6354	3.36806	5.18596	3.72981	7.83503	7.68318	6.63334	7.38385	4.45665	4.01343	3.2465	3.90553	6.74484	9.03073	7.82113	7.86557
EVM0007809	20.1241	19.0566	20.8919	20.0242	7.83053	8.10605	8.53578	8.15745	6.73948	6.54595	5.9893	6.42491	6.24856	5.07851	5.46123	5.5961	9.0164	9.00054	7.28293	8.43329	19.1505	18.1074	17.2872	18.1817	8.05326	7.9154	8.46429	8.14432	9.6169	9.06534	9.42065	9.36763	8.73954	9.95883	8.27003	8.98947	10.2866	10.2096	9.5924	10.0295
EVM0034051	2.16377	1.93337	2.01529	2.03748	1.0394	0.833598	1.16943	1.01414	0.868243	0.833828	0.969987	0.890686	0.71435	0.744358	0.805955	0.754888	1.47107	1.19613	1.63537	1.43419	0.864907	0.615261	0.556753	0.678974	0.316352	0.443851	0.410224	0.390142	0.361708	0.433936	0.331144	0.375596	0.298769	0.403406	0.427621	0.376599	0.285009	0.340831	0.459037	0.361626
EVM0034053	32.8197	32.2464	34.9283	33.3315	21.8383	26.4823	22.0715	23.464	35.3697	34.3571	34.4559	34.7276	48.0696	42.9633	39.1201	43.3843	43.5532	40.5458	45.2303	43.1098	31.0856	34.3765	32.5845	32.6822	25.8508	24.4049	26.8583	25.7047	32.9945	30.271	30.051	31.1055	55.2398	52.6758	51.6764	53.1974	42.9886	47.3774	43.7727	44.7129
EVM0019322	4.17692	4.33885	4.0954	4.20372	2.27531	1.47952	1.7754	1.84341	2.2943	2.69304	2.21235	2.39989	1.03144	1.55394	0.95814	1.18117	1.82365	2.42151	2.23228	2.15915	4.17829	4.62153	4.18875	4.32953	2.27087	2.45005	2.2358	2.31891	2.4997	2.66871	2.93544	2.70128	1.50723	2.56408	1.94935	2.00689	2.04399	1.89924	2.29205	2.07843
EVM0019320	1.19041	0.978456	0.595826	0.921564	0.513341	0.612114	0.73417	0.619875	0.16895	0.821375	0.378063	0.456129	0.21021	0	0	0.07007	0	1.01059	0.100357	0.370314	1.45204	0.624975	0.82898	0.968666	1.75489	2.19898	2.02789	1.99392	1.06406	0.868975	0.808651	0.913894	1.08671	0.663541	0.54437	0.764875	1.087	1.08776	0.338588	0.837781
EVM0050137	16.9257	15.0927	16.4607	16.1597	6.63753	6.97184	7.90831	7.17256	3.88925	5.64096	4.8288	4.78634	1.68665	2.15612	1.78372	1.8755	3.51595	4.38331	5.08787	4.32904	13.8233	15.4195	14.4611	14.568	8.12073	8.32863	9.51669	8.65535	9.25289	11.1469	10.4787	10.2928	6.01859	4.28488	5.47901	5.26083	5.26523	7.18768	5.627	6.02664
EVM0050136	6.88367	6.8666	7.41596	7.05541	4.60266	5.25538	4.2686	4.70888	3.43216	3.41779	2.85619	3.23538	3.14354	3.09346	3.67963	3.30554	5.28231	4.43011	5.26031	4.99091	7.98209	7.46175	7.78555	7.74313	4.03187	4.43679	4.14804	4.20557	4.04489	4.22639	4.08026	4.11718	4.30455	5.18666	4.93194	4.80772	5.714	5.57945	5.83373	5.70906
Salix_babylonica_newGene_182	5.06951	6.34145	4.33904	5.25	10.7582	11.4609	10.1505	10.7899	8.74879	9.38576	10.7009	9.6118	5.41102	6.82411	5.85657	6.03057	11.5404	9.95041	9.9735	10.4881	9.18342	10.4377	10.5673	10.0628	9.22957	11.0978	9.63212	9.9865	10.584	11.67	10.221	10.825	8.97819	8.47759	8.05861	8.5048	11.891	9.90126	9.25201	10.3481
Salix_babylonica_newGene_180	1.98777	2.45078	2.04287	2.16047	0.519828	1.13235	0.694586	0.782254	0.341843	0.143574	0.254281	0.246566	0.270143	0.788609	0.685541	0.581431	1.29337	0.69728	0.554873	0.848508	1.79845	1.30181	1.38157	1.49395	0.360786	0.291134	0.407909	0.353276	0.242485	0.080609	0.622313	0.315136	0.155248	0.098039	0.195311	0.149533	0.497548	0.804678	0.782901	0.695042
EVM0025621	4.61085	3.50655	5.23256	4.44998	2.15789	2.10039	2.0273	2.09519	1.35427	1.66753	1.73608	1.58596	1.52807	0.761415	2.15611	1.48187	2.31288	1.54224	1.3061	1.7204	3.10379	2.94451	3.85141	3.2999	1.85901	1.56557	1.78032	1.73496	2.14054	1.98503	1.69658	1.94072	1.32414	1.91306	2.19878	1.81199	1.6043	1.86599	2.9391	2.13646
EVM0025620	0	0	0.098271	0.032757	0	0	0	0	0.318114	0.187975	0.18129	0.229126	1.25575	1.07211	2.52531	1.61772	3.99579	4.26183	3.30524	3.85429	1.23792	2.27513	1.49074	1.66793	0	0.496104	0.177394	0.224499	0.750364	0.450668	0.442615	0.547882	3.36039	2.90784	2.40443	2.89088	3.34888	3.03983	2.91342	3.10071
EVM0025623	1.49003	1.51682	1.04607	1.35097	1.98273	1.68059	1.96489	1.87607	0.394338	0.375243	0.683205	0.484262	0.700882	0.554619	0.557157	0.604219	0.549393	1.34843	0.693969	0.86393	3.36122	2.66971	3.03419	3.02171	0.854509	0.54755	0.814477	0.738845	0.930207	0.706941	1.085	0.907384	0.209753	0.481902	0.446068	0.379241	0.645906	0.790974	0.659375	0.698752
EVM0025622	11.0447	11.8268	12.2318	11.7011	27.1437	25.6385	27.565	26.7824	9.11243	8.43369	8.57438	8.70683	5.25081	5.42904	5.27069	5.31685	5.83575	5.60229	5.17687	5.5383	11.9654	13.0305	13.1791	12.725	30.0989	29.939	29.2997	29.7792	16.0577	17.0116	15.8859	16.3184	7.88297	6.34691	6.45046	6.89345	7.42351	8.25242	7.57072	7.74888
EVM0025624	3.85379	4.16939	4.6544	4.22586	3.568	2.97869	3.68245	3.40971	1.56389	1.55101	1.44952	1.52147	1.21096	1.31661	1.51653	1.34803	1.7683	2.27484	1.47414	1.83909	0.717355	0.897239	0.886997	0.833864	0.444869	0.588396	0.544509	0.525925	0.246254	0.279965	0.161241	0.229153	0.708027	0.426976	0.421942	0.518982	0.588725	0.813423	0.580469	0.660872
EVM0021751	2.56825	4.2215	3.64071	3.47682	15.1468	16.9394	16.2392	16.1085	7.02539	6.23571	6.42434	6.56181	6.41686	7.46268	7.14966	7.00973	4.51396	4.28846	5.44521	4.74921	5.37836	5.6598	5.09741	5.37852	11.8076	11.9616	10.7195	11.4962	8.60009	6.14161	7.50612	7.41594	10.6669	10.5372	9.94394	10.3827	8.48972	9.17095	8.63551	8.76539
EVM0021757	1.249	1.14369	0.671522	1.0214	1.81385	1.56351	1.69599	1.69111	4.05099	4.11836	3.98082	4.05006	1.35946	1.66506	1.49306	1.50586	1.79487	1.05885	2.42087	1.7582	1.50924	1.21589	1.29928	1.34147	2.10175	2.27618	2.59726	2.32506	3.35364	4.54309	3.32203	3.73959	2.19903	1.83044	1.96483	1.9981	2.39171	2.54573	2.81528	2.58424
EVM0021756	8.07838	7.25687	8.21584	7.85036	14.0744	13.6065	12.578	13.4196	10.4807	10.1876	10.2449	10.3044	6.09769	6.99544	7.26016	6.78443	5.71569	6.75698	6.88903	6.4539	6.91462	7.23814	9.05244	7.73507	16.3566	15.8842	16.259	16.1666	13.5952	13.7787	10.1696	12.5145	8.07307	7.31303	8.69215	8.02608	7.38782	7.25011	7.94444	7.52746
Salix_babylonica_newGene_450	0.151509	0.379761	0.312558	0.281276	0.229953	1.26474	0.664106	0.7196	0.459563	0.933358	0.669798	0.687573	0.201366	0.931611	0.371272	0.501416	0.700773	0.331725	0.437372	0.489957	2.63433	2.36836	2.35108	2.45126	4.83932	4.5007	4.13963	4.49322	2.78181	2.65967	2.79942	2.74696	3.75309	3.63431	3.09389	3.49376	3.09882	2.8197	3.0781	2.99887
EVM0029501	16.2871	25.6532	15.0364	18.9922	21.0506	22.706	20.1299	21.2955	15.7084	18.266	19.8142	17.9295	11.6096	14.0444	12.9765	12.8768	13.4712	14.9383	16.5855	14.9983	34.6834	33.5332	29.0593	32.4253	44.1907	50.9303	47.5606	47.5605	49.915	54.9023	57.7703	54.1959	47.7594	33.5319	37.5347	39.6086	33.9144	33.0663	31.8975	32.9594
EVM0038195	9.39178	8.77559	9.44544	9.20427	7.2462	7.34176	7.50645	7.3648	7.59024	7.73716	8.49606	7.94115	16.5254	15.8453	16.07	16.1469	15.3171	14.1481	13.2248	14.23	9.23304	8.56718	8.84894	8.88305	8.54159	7.85274	7.37985	7.92472	7.29201	7.90868	8.17624	7.79231	19.3785	18.9185	16.9472	18.4147	17.1532	18.8445	17.3906	17.7961
EVM0038196	24.5402	21.9751	22.5	23.0051	26.9989	27.9493	23.8946	26.2809	27.4057	27.2572	25.5062	26.723	45.2587	45.9567	43.4918	44.9024	46.2118	56.7757	56.2226	53.07	20.8406	19.021	20.5279	20.1298	23.8885	24.1751	25.5394	24.5343	21.0004	21.5711	22.4406	21.6707	38.2894	36.7493	38.5972	37.8786	46.5713	45.466	45.8162	45.9512
EVM0038199	2.6615	1.9842	2.33471	2.3268	2.47468	2.33929	2.36784	2.39394	3.08378	2.61333	2.9666	2.8879	3.88219	3.39958	3.76726	3.68301	2.52552	3.06457	3.5108	3.03363	0.828903	1.02711	0.86246	0.906159	0.898594	1.11902	1.36895	1.12886	0.810881	0.700855	0.793448	0.768395	1.7005	1.21978	1.10483	1.3417	1.55	1.49245	1.18687	1.40977
EVM0025991	0.181441	0.513908	0.32941	0.341586	0.388569	0.276363	0.35679	0.340574	1.37084	0.977492	0.863326	1.07055	0.854168	0.425064	0.800358	0.693197	1.52345	1.35765	1.02495	1.30202	0.114498	0.085561	0.143803	0.114621	0.149661	0.106467	0.08106	0.112396	0.488712	0.388414	0.376049	0.417725	0.756926	1.0066	1.01596	0.926493	1.24825	1.29439	0.838106	1.12692
EVM0021289	5.32034	5.5577	4.79748	5.22517	2.31891	1.73873	2.1795	2.07905	0.8519	1.10826	1.23379	1.06465	0.27908	0.667836	0.473525	0.47348	1.78849	2.57609	1.34092	1.90183	2.24262	2.51196	2.96609	2.57356	1.41756	1.2658	1.47589	1.38641	1.50153	0.978105	1.17756	1.21906	1.32916	1.23097	0.991971	1.18404	1.19199	1.10664	0.985674	1.09477
EVM0021283	9.07125	9.9181	10.1586	9.71597	29.49	29.1007	28.4703	29.0203	11.7988	11.1914	10.7732	11.2545	3.32996	3.64058	4.05908	3.67654	4.79118	4.45413	4.91763	4.72098	25.2984	25.3493	25.6258	25.4245	44.3226	39.4937	42.5763	42.1309	33.0371	30.7201	30.8826	31.5466	3.66017	4.081	5.10845	4.28321	6.08042	4.87009	6.18464	5.71172
Salix_babylonica_newGene_6584	0	0	0	0	0	0	0	0	0	0	0	0	0	0	0	0	0	0	0	0	0.699038	0.653788	1.85367	1.06883	1.23811	0.513448	0.622345	0.791301	0.414288	0.26402	0.114884	0.264397	1.25733	0.850878	0.776726	0.961646	1.19155	1.22071	1.59634	1.3362
Salix_babylonica_newGene_5584	4.66169	12.9511	4.0106	7.20779	5.88457	7.28648	6.18111	6.45072	0.917337	2.79166	2.3512	2.02007	0.291676	0	0	0.0972253	0	0.166878	0	0.055626	0.344144	0.385237	0	0.243127	0.391921	0.608891	0.270989	0.423934	0.346952	0	0.120973	0.155975	0	0	0	0	0	0.1185	0	0.0395
EVM0017029	3.95337	4.46923	3.29846	3.90702	1.47021	3.53071	2.37545	2.45879	1.79012	2.24571	2.52045	2.18542	1.12099	1.72401	1.66052	1.50184	2.17858	1.78674	2.41609	2.12714	4.11707	4.55261	4.34972	4.3398	3.73036	2.92598	3.30435	3.32023	4.38045	3.97582	3.7441	4.03346	3.08103	3.10826	2.98174	3.05701	2.30798	3.44887	2.98162	2.91282
Salix_babylonica_newGene_6054	1.0352	0.870419	0.855255	0.920291	1.02076	0.816319	1.03454	0.957206	0.890013	1.31817	0.594975	0.934385	0.812459	1.37046	1.16857	1.11716	0.886067	1.04619	0.957308	0.96319	0.566217	1.50236	2.17134	1.4133	2.24332	2.38507	2.17584	2.26807	0.765776	1.63663	2.04881	1.48374	1.2578	1.80742	1.07648	1.38057	1.72525	1.52093	1.64784	1.63134
EVM0035019	2.0805	1.1442	1.31372	1.51281	0.438426	0.493502	0.589083	0.507004	0.350106	0.406063	0.287815	0.347995	0.097439	0	0	0.0324797	0.193962	0.282217	0.425112	0.30043	0.61801	0.8633	0.806476	0.762595	0.688996	0.5003	0.504612	0.564636	0.736514	0.921903	0.45077	0.703062	0.274704	0.380272	0.128779	0.261252	0.612701	0.380211	0.231005	0.407972
EVM0035018	4.52105	5.31347	3.92115	4.58523	1.89005	1.74748	3.1816	2.27304	1.65701	1.57255	2.46409	1.89788	1.78572	2.84589	2.27578	2.30246	1.91926	1.58413	1.95262	1.81867	1.11304	1.6334	0.959029	1.23516	1.9387	3.13285	1.25753	2.10969	0.721852	0.528578	0.912258	0.720896	0.522731	0.666852	0.491773	0.560452	0.801868	1.27928	1.11813	1.06643
EVM0035017	15.4837	11.9586	12.989	13.4771	25.4261	24.3578	25.4423	25.0754	134	145.514	132.643	137.386	307.214	306.775	289.327	301.105	361.915	393.869	411.494	389.093	16.5461	16.3782	18.2431	17.0558	21.3542	23.5319	21.2853	22.0572	35.7141	39.1479	39.0429	37.9683	45.7973	43.257	44.9363	44.6635	50.0164	46.8696	49.1462	48.6774
EVM0035015	34.561	35.3908	35.6327	35.1948	34.0391	32.0517	35.5488	33.8799	47.9592	43.7003	45.6993	45.7863	63.1282	62.0277	67.0566	64.0708	49.2822	48.5953	52.8224	50.2333	25.1596	24.8384	25.6234	25.2071	28.9501	28.3531	29.4126	28.9053	27.7255	27.8362	29.1258	28.2292	41.9521	42.4119	43.3721	42.5787	45.7107	42.5355	44.2362	44.1608
EVM0035014	1.98996	2.82473	2.3499	2.3882	2.08341	1.89158	1.59047	1.85516	2.53924	3.56774	3.20709	3.10469	2.98826	2.05281	2.55461	2.53189	2.61024	2.63584	2.67095	2.63901	0.477455	0.953679	1.19664	0.875925	0.923363	0.372762	0.599989	0.632038	1.31806	1.98696	1.35834	1.55445	1.73398	2.30213	2.08797	2.04136	1.63522	1.34009	1.69581	1.55704
EVM0035011	28.4738	30.9077	33.522	30.9678	26.8691	24.1863	26.9246	25.9934	18.165	18.7911	17.8515	18.2692	6.43383	7.59222	6.49398	6.84001	12.0548	13.5073	10.4478	12.0033	33.4801	36.2126	32.3129	34.0019	28.4356	24.7667	27.5996	26.934	14.5863	15.8359	15.6002	15.3408	10.3319	9.82325	10.1852	10.1135	9.85843	11.9604	11.2402	11.0197
EVM0035010	13.7211	12.4201	11.0675	12.4029	12.727	11.6157	12.5721	12.3049	14.1471	13.2277	12.8008	13.3919	6.1033	6.75737	5.36419	6.07496	9.21878	8.9975	8.88755	9.03461	8.00517	8.24691	8.60825	8.28678	10.6158	9.95029	10.1538	10.24	16.9589	16.7057	17.1256	16.9301	5.89484	5.81152	5.8185	5.84162	6.37652	6.55757	7.28061	6.73823
EVM0020482	2.70874	3.11382	3.34443	3.05566	1.67326	2.05081	2.74964	2.1579	1.77334	1.25073	1.27955	1.43454	1.0674	0.768863	1.13746	0.991242	0.812498	0.641185	0.904181	0.785955	2.68742	2.97532	3.17262	2.94512	2.05366	2.00327	1.85794	1.97163	1.54987	1.47018	1.40399	1.47468	1.19495	1.17531	0.946629	1.10563	1.18918	1.84663	1.07484	1.37022
EVM0020483	3.38541	5.05063	5.18489	4.54031	2.01034	1.5267	2.28497	1.94067	1.80808	2.66183	1.97156	2.14716	2.04562	1.52509	1.11162	1.56078	3.13409	1.75113	2.16005	2.34842	1.88974	2.81371	3.40606	2.70317	1.02209	1.09499	1.26	1.12569	1.87485	1.12578	1.84335	1.61466	1.1837	1.83236	1.6732	1.56309	1.40076	2.17257	1.38097	1.65143
EVM0051772	2.2235	2.95647	2.01927	2.39975	1.04112	0.694584	0.592202	0.775968	0.763073	0.403545	0.691517	0.619378	0.556754	0.565505	0.493987	0.538749	0.411108	1.11994	0.515303	0.682118	4.3438	4.88543	5.4239	4.88438	1.80289	1.09224	1.36011	1.41841	0.887539	0.7427	0.465818	0.698686	1.71751	1.33841	1.61684	1.55759	1.22378	0.781039	0.63421	0.879676
EVM0023667	1.23479	0.894225	0.99768	1.04223	0.855387	0.546629	0.746534	0.716183	0.847248	0.89373	0.685808	0.808929	0.409665	0.328687	0.311935	0.350096	0.522894	0.632439	0.63008	0.595138	0.775906	0.703707	0.745667	0.74176	0.418894	0.433978	0.271068	0.374647	0.593185	0.358067	0.488309	0.479854	0.120589	0.193478	0.29176	0.201942	0.370364	0.229883	0.536272	0.37884
EVM0056209	0.769517	1.03311	1.07932	0.960648	0.691924	0.343598	0.545117	0.52688	0.53502	0.532944	0.150644	0.406203	0.195117	0.186884	0.186719	0.189573	0.332401	0.163784	0.143502	0.213229	1.8667	1.4731	1.65688	1.66556	0.876636	1.14278	0.960225	0.993213	0.431149	1.13776	0.913787	0.827566	0.398961	0.472898	0.256411	0.37609	0.836539	0.404629	0.510311	0.583826
EVM0056200	19.8299	18.2909	19.2688	19.1299	10.5924	10.8356	10.9783	10.8021	12.7387	11.9931	13.3134	12.6817	19.101	17.0241	19.7555	18.6269	25.0893	24.717	25.433	25.0797	27.9741	28.9508	27.9931	28.306	9.35167	9.89838	9.18098	9.47701	17.8326	17.3412	15.6601	16.9446	16.3141	19.5749	17.239	17.7093	18.5693	19.2002	20.1928	19.3208
EVM0056203	4.30245	4.63209	3.81946	4.25133	1.47691	1.19238	1.74125	1.47018	1.26845	1.31476	1.42074	1.33465	0.884	1.4676	1.2091	1.1869	2.28263	1.84161	2.23596	2.12007	3.25734	4.09606	3.49704	3.61682	0.882511	0.921826	0.545036	0.783124	0.636699	0.959583	0.921294	0.839192	0.63749	0.6119	0.898393	0.715928	1.30192	0.964393	0.899257	1.05519
EVM0056202	1.59522	1.58122	1.84095	1.67246	1.34452	1.35739	1.56368	1.42186	0.547382	0.78927	0.974771	0.770474	0.219949	0.234253	0	0.151401	0.244218	0.256726	0.421121	0.307355	2.04626	1.3243	1.46232	1.61096	1.96393	1.73315	1.61348	1.77018	1.38379	1.55771	1.36465	1.43538	0.645015	0.369826	0.216025	0.410289	0.865764	0.566725	0.317431	0.583307
EVM0056205	47.5835	57.8954	48.7552	51.4113	44.8148	42.8076	42.0819	43.2348	55.4719	56.2382	48.287	53.3324	88.1057	85.4109	86.6518	86.7228	67.716	73.3176	71.3274	70.787	75.2014	71.4733	69.8586	72.1777	63.3711	66.7724	64.0458	64.7298	48.5837	48.9921	53.5783	50.3847	118.809	110.976	119.019	116.268	93.687	104.569	97.4372	98.5645
EVM0056206	3.62541	3.76398	2.86568	3.41835	3.02331	2.49739	3.02465	2.84845	2.24353	1.3456	1.22823	1.60578	1.4115	1.29979	2.14157	1.61762	1.6231	1.54822	2.36194	1.84442	0.959468	0.938429	1.08188	0.993259	0.828147	1.74815	2.6227	1.733	0.603807	1.12371	1.04761	0.925042	1.26511	0.366082	1.37314	1.00144	0.938014	0.429625	1.22415	0.863931
EVM0020158	21.6049	22.9964	21.7612	22.1208	13.9593	14.8119	10.6623	13.1445	6.45144	7.48773	6.52265	6.82061	4.72887	4.42234	3.92679	4.35933	8.94616	10.7296	8.84728	9.50769	5.76274	5.63993	5.16799	5.52355	2.06323	3.37032	2.52256	2.65204	1.9579	2.1338	2.2813	2.12433	0.496616	0.558358	0.539965	0.531646	0.932975	1.32834	0.862646	1.04132
EVM0002694	15.7678	17.0009	19.4977	17.4221	10.0325	10.1985	11.5012	10.5774	14.6384	13.7423	16.2121	14.8643	14.857	13.2817	14.5354	14.2247	15.7632	18.0171	17.172	16.9841	15.8291	14.8076	14.7449	15.1272	7.63333	6.74662	7.51187	7.29727	10.4966	10.4623	9.39164	10.1168	7.21467	7.12152	7.42187	7.25269	6.9129	6.6802	6.00097	6.53136
EVM0020150	0.513025	0.629012	0.512692	0.551576	0.370184	0.379934	0.108276	0.286131	0.215813	0.259927	0.240217	0.238652	0.238155	0.092478	0	0.110211	0.245725	0.512076	0.179389	0.312397	0.10898	0.214736	0.281535	0.20175	0.139378	0.202513	0.060847	0.134246	0.260521	0.053239	0.282112	0.198624	0.019176	0.055372	0.088413	0.0543203	0	0.058555	0	0.0195183
EVM0020154	11.2968	14.5829	11.444	12.4412	4.14759	4.23957	5.24684	4.54467	2.89941	3.5138	2.54	2.9844	0.847699	1.32277	1.3715	1.18066	1.04138	1.14514	0.893856	1.02679	8.52891	7.89572	7.734	8.05288	2.82495	3.86523	3.19963	3.2966	1.30681	1.84122	2.03338	1.72714	0.455092	0.370571	0.177813	0.334492	0.226595	0.632414	0.957325	0.605445
EVM0023597	1.9968	2.302	2.24391	2.1809	1.24714	1.45001	1.16963	1.28893	1.83173	2.67802	0.777914	1.76255	1.27315	0.532584	1.03363	0.946455	2.2191	1.69046	1.73378	1.88111	3.6164	3.62484	3.62741	3.62288	2.84138	5.26056	2.96774	3.68989	3.17013	4.18301	3.28364	3.54559	3.56106	1.81609	2.49566	2.62427	3.31295	2.25067	3.4216	2.99507
EVM0002690	7.45281	7.74158	7.59555	7.59665	7.05083	6.16979	6.17708	6.4659	12.2422	13.5371	13.6507	13.1433	20.1501	19.1133	18.8526	19.372	20.654	19.2424	21.9655	20.6206	10.2429	9.06114	8.95839	9.42082	2.56199	2.78615	2.80858	2.71891	7.15065	8.40291	8.83606	8.12987	10.7111	10.3838	12.0753	11.0567	13.2415	11.7421	12.7202	12.568
EVM0028360	0.850371	1.50758	1.25652	1.20482	1.22251	0.695617	0.424129	0.780751	1.36228	0.682597	1.66684	1.23724	1.42437	2.26566	1.63945	1.77649	1.59617	1.72406	2.92953	2.08325	1.32399	1.41123	1.00232	1.24584	0	0.444408	0.277388	0.240599	0.875564	0.217014	0.106391	0.399656	0.736613	1.65464	1.14348	1.17824	0.847527	1.65599	1.23293	1.24548
EVM0006589	5.3182	6.29417	4.68895	5.43377	3.63122	3.29679	2.96287	3.29696	3.6473	3.15395	4.02206	3.60777	2.42268	2.7597	1.39611	2.19283	5.20459	5.24731	4.62634	5.02608	7.21447	6.79519	5.88321	6.63096	2.46667	1.86033	1.61767	1.98156	2.95478	3.01934	3.00179	2.99197	2.55973	2.08254	2.18835	2.27687	3.54148	3.55603	2.89445	3.33066
EVM0000711	2.36774	2.86994	1.75661	2.33143	0.973911	0.9424	0.736537	0.884283	0.092495	0	0.776709	0.289735	0.555978	0.455872	0	0.337283	0.820297	1.63525	1.10341	1.18632	5.92943	3.28714	5.86598	5.02751	0.495449	1.38035	0.722587	0.86613	0.640289	0.847681	0.847147	0.778372	1.06152	0.536738	0.641466	0.746576	2.0761	2.56466	1.89182	2.17753
EVM0000714	0.042611	0.129044	0	0.0572183	0.359817	0.7731	0.80387	0.645596	0.946943	1.17811	1.20664	1.11056	0.903197	0.345616	0.226013	0.491609	0.224453	0.218001	0.048914	0.163789	0.537131	0.493138	0.178852	0.40304	1.95013	1.66923	1.33066	1.65001	2.82646	2.26118	2.68319	2.59028	1.50893	1.85775	1.31988	1.56219	1.43992	1.24848	2.01022	1.56621
EVM0000717	7.96136	8.25658	8.10139	8.10644	2.88591	2.69203	2.74082	2.77292	2.02253	2.16689	1.81626	2.00189	1.13969	2.04393	1.00222	1.39528	7.32707	6.39238	4.7899	6.16978	4.9518	4.55006	4.09645	4.53277	2.31316	1.81458	1.61152	1.91309	0.989692	0.793119	0.876881	0.886564	3.30499	3.79144	4.19097	3.76247	6.61616	6.54724	6.10446	6.42262
EVM0000719	4.07995	5.00803	4.67463	4.58754	3.79548	3.87728	3.53044	3.7344	3.56712	3.75981	3.93042	3.75245	1.98602	1.59896	2.28305	1.95601	3.08798	3.0324	2.95352	3.02463	5.32829	5.63012	5.36959	5.44267	2.76794	3.00672	2.54154	2.77207	3.52541	2.94621	2.96041	3.14401	1.10982	1.24822	1.64183	1.33329	1.99199	2.4033	2.98521	2.46017
EVM0006728	32.2742	32.9107	40.0016	35.0621	36.1717	36.5437	36.7795	36.4983	43.2521	43.4704	42.3548	43.0258	53.8425	54.4035	54.5767	54.2742	31.7803	31.6842	28.5339	30.6661	29.666	32.0011	31.3165	30.9945	33.4958	34.4459	35.8642	34.602	19.637	19.3837	20.874	19.9649	28.7274	29.1393	29.0015	28.9561	24.1386	26.0802	25.9004	25.3731
EVM0039648	27.8882	25.9461	27.4626	27.099	19.6863	19.5378	17.2246	18.8162	16.4639	14.8377	14.4983	15.2666	17.0343	15.9509	13.7844	15.5899	11.1829	15.6871	15.0249	13.965	35.6633	35.3838	36.9167	35.9879	12.1362	13.7902	13.6865	13.2043	19.1122	18.2511	19.1276	18.8303	18.9641	23.8291	24.3954	22.3962	14.4328	16.3227	15.3885	15.3813
EVM0039646	13.3874	15.7552	13.4228	14.1884	26.6119	29.5289	25.9282	27.3563	67.9742	64.1684	59.5001	63.8809	47.6448	43.1013	40.2527	43.6662	28.9347	29.1252	33.7172	30.5923	13.188	14.4523	13.2791	13.6398	22.4336	27.3651	25.7882	25.1956	46.0704	48.3879	44.7559	46.4048	44.6322	37.6005	39.6652	40.6326	25.1005	26.8446	29.567	27.1707
EVM0039647	6.5146	4.69636	4.7761	5.32902	1.94818	0.543191	0.870209	1.12053	1.43799	1.65207	1.44447	1.51151	0	0	0	0	0	0	0.109509	0.036503	0	0	0	0	0	0	0	0	0.094457	0	0	0.0314857	0	0	0	0	0	0	0	0
EVM0039644	4.70484	4.44266	5.10878	4.75209	1.72103	1.81	1.68358	1.7382	1.44222	1.60443	1.36527	1.47064	1.88877	1.85973	1.57643	1.77497	2.25087	2.23034	2.3235	2.26824	2.63058	2.4746	2.32389	2.47636	2.11916	1.90208	1.36443	1.79523	0.883807	0.684359	1.14336	0.903842	1.44584	1.20057	1.48337	1.37659	2.22016	2.08312	2.17425	2.15918
EVM0039645	98.7884	97.9873	95.7846	97.5201	171.875	170.52	166.042	169.479	218.359	230.627	216.948	221.978	388.517	383.182	385.13	385.61	261.262	256.635	265.964	261.287	98.2212	100.13	103.796	100.716	150.057	143.384	145.311	146.251	200.932	209.263	206.165	205.453	381.707	373.883	373.193	376.261	227.322	234.952	223.029	228.434
EVM0039642	0.575337	0.885784	0.795412	0.752178	0.461868	0.620551	0.210413	0.430944	0.786072	0.937438	0.73173	0.818413	0.44819	0.928506	0.349341	0.575346	1.28556	1.79366	0.786301	1.28851	2.55011	3.52154	2.12362	2.73176	0.334841	0.254859	0.395874	0.328525	0.992107	1.06243	1.1714	1.07531	0.914531	1.39329	0.891697	1.06651	1.83218	1.80134	1.50592	1.71315
EVM0039641	2.2388	2.50475	1.6076	2.11705	2.22742	2.46728	2.21382	2.30284	2.82056	1.85751	2.58507	2.42105	1.06585	0.960456	1.02567	1.01732	1.21663	1.97228	1.5877	1.5922	1.97363	3.11723	2.61428	2.56838	1.55665	1.7261	1.56564	1.61613	1.92926	2.13209	2.35614	2.13916	1.83705	1.62075	2.05746	1.83842	1.13252	1.47056	1.22253	1.2752
EVM0037569	2.67089	5.7016	3.56589	3.97946	1.31514	1.95844	3.34938	2.20765	0.488917	0.621149	1.22165	0.777239	1.32164	1.37356	1.45285	1.38268	2.95944	5.01944	4.24455	4.07447	7.9125	7.39626	10.6837	8.66415	2.08086	1.1328	1.99528	1.73631	2.63609	1.99153	2.15537	2.261	2.92604	2.04519	1.50689	2.15938	3.96002	3.18571	3.06269	3.40281
EVM0045147	246.773	281.601	215.024	247.799	149.647	118.422	111.889	126.653	123.57	120.603	100.004	114.726	91.7063	79.6059	103.769	91.6938	155.729	192.573	156.38	168.227	467.061	642.515	490.56	533.379	108.074	100.278	99.759	102.704	109.687	103.109	120.561	111.119	60.1351	43.5515	60.5384	54.7416	231.773	173.141	187.384	197.433
EVM0045145	40.5932	42.059	40.5264	41.0595	33.5179	33.4706	36.4223	34.4703	23.9622	25.4626	25.5639	24.9962	17.776	17.5784	17.1976	17.5174	23.3372	20.7963	19.959	21.3642	37.5042	37.4707	35.8132	36.9294	31.446	31.3615	32.8185	31.8753	24.1048	24.1214	25.2337	24.4866	21.3654	24.1044	20.8099	22.0932	22.8484	25.3625	23.9096	24.0402
EVM0037565	3.24055	3.48814	3.64056	3.45642	2.62184	3.09698	3.18919	2.96934	4.43621	3.29509	4.31988	4.01706	2.37102	1.88492	2.01567	2.09054	1.72009	2.36778	1.80648	1.96479	1.44043	1.50713	1.68887	1.54547	2.36201	2.47722	1.79067	2.20997	1.80486	3.54976	1.79517	2.38326	1.86501	1.42797	2.00174	1.76491	1.50096	0.705847	0.878929	1.02858
EVM0037560	5.90207	5.62266	6.67297	6.0659	4.20901	3.91445	3.93097	4.01814	1.77197	1.87396	2.44959	2.03184	0.076422	0.241149	0.281663	0.199745	1.48368	0.984428	1.41119	1.2931	5.95806	5.38054	5.33742	5.55867	7.10515	6.65787	5.84062	6.53455	4.29192	4.23838	4.37061	4.3003	1.92919	2.06931	1.96788	1.98879	2.64382	2.98158	2.65203	2.75914
EVM0037563	0.822984	0.838426	1.18026	0.947224	0.813032	0.526495	1.09648	0.812002	0.175437	0.184009	0.210383	0.189943	0.336549	0.479433	0.660013	0.491998	0.64284	0.380032	0.79521	0.606027	0.905236	0.863599	0.551654	0.773496	0.68963	0.711716	0.569032	0.656793	0.113143	0.030171	0.147553	0.0969557	0.113305	0.469173	0.541047	0.374508	0.394228	0.629943	0.615664	0.546612
EVM0033418	46.2989	41.3867	38.5536	42.0797	18.6226	18.6423	21.1937	19.4862	10.77	11.7647	10.2152	10.9166	7.54603	8.40418	7.60521	7.85181	21.1143	20.8481	20.299	20.7538	43.3228	37.6707	42.9547	41.3161	21.8149	23.6191	19.2942	21.5761	14.864	16.683	15.2027	15.5832	10.0797	10.2495	9.30486	9.87804	14.9781	15.953	14.0565	14.9959
EVM0033414	0.486012	0.497375	0.645766	0.543051	0.190146	0.338141	0.472705	0.333664	0.437378	0.441153	0.630548	0.503026	0.367293	0.437009	0.363055	0.389119	0.348471	0.737968	0.413543	0.499994	0.508339	0.788542	0.64974	0.648874	0.648059	0.660711	0.635945	0.648238	0.598383	0.682218	0.705846	0.662149	0.603909	0.910518	1.1713	0.895242	0.719703	1.06361	0.823749	0.86902
EVM0033413	13.842	14.8834	14.123	14.2828	8.38312	7.44341	7.7932	7.87324	23.1062	22.7109	23.4415	23.0862	49.7003	43.3143	42.7533	45.2559	27.406	28.6654	25.9393	27.3369	12.945	11.4015	11.2794	11.8753	6.87376	6.47752	7.17644	6.84258	9.20441	9.01432	9.00536	9.0747	10.5522	9.93517	9.41243	9.96658	9.16383	9.3126	9.06637	9.18094
EVM0033412	2.5597	2.6627	2.8551	2.6925	4.07929	4.71364	4.7669	4.51994	7.5448	6.11326	6.95015	6.8694	2.44846	2.94367	2.35555	2.58256	1.45377	1.72442	1.90183	1.69334	1.93467	2.49986	2.18128	2.20527	5.29282	5.03926	6.64029	5.65746	4.75058	5.02849	4.69949	4.82618	1.82561	1.83688	2.48685	2.04978	1.70522	1.93093	1.68705	1.7744
EVM0044816	3.98121	3.75715	2.33981	3.35939	1.41846	1.45608	1.7827	1.55241	1.32484	1.80322	1.66578	1.59795	0.368161	0.439495	0.111783	0.30648	0.439463	0.280386	0.35937	0.35974	6.93387	6.44319	5.39478	6.25728	6.19656	4.44905	5.85178	5.49913	6.04534	5.48165	5.30155	5.60951	0.47974	0.543722	0.470181	0.497881	0.560789	0.285584	0.03119	0.292521
EVM0049823	2.56529	2.7898	2.65108	2.66872	1.08669	0.933113	1.02716	1.01566	0.934349	0.404159	0.849711	0.729406	1.08358	0.829763	0.536502	0.816614	1.3971	1.70218	1.71813	1.6058	1.2555	1.05129	1.31752	1.2081	1.12332	1.51355	0.95492	1.19727	0.705249	0.701683	0.669662	0.692198	0.446546	0.435499	0.428076	0.436707	0.969338	1.12407	0.669979	0.921129
EVM0049822	32.6775	28.1705	31.8922	30.9134	54.7342	47.5866	54.4312	52.2507	63.5042	65.0998	60.0738	62.8926	37.7956	39.7543	44.4221	40.6573	48.7598	47.7946	47.2583	47.9376	31.4563	32.7557	34.727	32.9797	44.0067	48.5837	45.081	45.8905	44.0818	52.1447	49.0083	48.4116	19.2381	16.4804	16.5362	17.4182	24.9673	23.6278	23.7633	24.1195
EVM0044813	6.35259	6.14583	6.44393	6.31412	3.14913	3.5725	4.11919	3.61361	4.81804	4.69411	4.95151	4.82122	2.19876	3.21095	2.88009	2.76327	4.17299	5.87654	5.06216	5.03723	5.56385	4.67693	5.2293	5.15669	3.02208	3.22434	3.54283	3.26308	4.79173	3.99048	4.73359	4.50527	4.03229	4.4402	5.39219	4.62156	4.30836	3.90996	4.78174	4.33335
EVM0045492	1.81307	1.8152	1.4864	1.70489	1.3106	1.61434	1.51916	1.48136	1.80336	2.0949	1.87264	1.92363	2.98639	3.04209	2.90532	2.97793	4.07743	3.31856	4.01994	3.80531	2.57897	2.50183	2.88264	2.65448	1.78869	2.35607	1.8069	1.98389	2.26966	2.68619	2.22263	2.39282	2.27551	3.17777	2.80688	2.75339	4.83544	3.63469	4.15346	4.20787
EVM0045499	21.478	19.5637	21.7727	20.9381	24.998	22.8571	23.5055	23.7869	27.4797	23.8908	24.6076	25.326	38.9379	39.1143	34.0429	37.365	39.651	39.1221	43.5509	40.7747	25.4209	24.5041	28.1296	26.0182	26.906	27.459	26.7897	27.0516	27.4966	27.6845	27.3668	27.5159	42.864	44.2938	45.9477	44.3685	47.9314	49.9881	49.709	49.2095
EVM0049798	2.29455	1.94274	2.01833	2.08521	1.19794	1.02399	0.944694	1.05554	1.11022	0.370253	0.309849	0.596773	0.587913	0.422079	0.604182	0.538058	0.449594	0.962805	0.56072	0.657706	1.86955	1.12479	2.06745	1.68726	1.70889	1.84246	1.69777	1.74971	2.02346	2.76581	1.97141	2.25356	0.463712	0.26623	0.408595	0.379512	1.0982	1.39495	0.883163	1.12544
EVM0049790	0.479587	1.53611	0.85431	0.95667	10.3038	10.8586	9.88488	10.3491	4.33242	4.66962	5.08795	4.69666	9.08724	9.76976	7.4551	8.7707	5.73498	4.94558	5.32514	5.33523	4.61757	3.56484	4.27367	4.15203	52.1975	54.2096	55.7574	54.0548	52.2917	46.4826	48.1375	48.9706	37.6235	38.8072	38.1615	38.1974	25.9077	22.3482	22.7975	23.6845
EVM0046429	3.31466	3.48398	4.86182	3.88682	1.04875	0.883685	1.75071	1.22772	2.04503	1.05972	2.1382	1.74765	1.20723	1.27062	1.05684	1.17823	1.49544	0.597671	1.19159	1.0949	1.75026	1.26477	1.11545	1.37683	1.27026	1.52822	1.08644	1.29497	0.640988	1.26762	1.04382	0.984143	0.596739	0.665861	0.435516	0.566039	1.6453	0.606097	0.923348	1.05825
Salix_babylonica_newGene_1276	1.79629	1.47959	1.46075	1.57888	1.42884	1.0783	0.691573	1.06623	1.29795	1.10102	1.27403	1.22433	0.493495	0.546435	0.535159	0.52503	1.08335	0.965012	0.708351	0.918904	1.00702	0.977593	1.04701	1.01054	0.696478	1.406	1.54946	1.21731	1.86511	1.57937	1.10597	1.51682	0.77824	0.667509	1.61268	1.01948	0.737467	0.550137	1.1696	0.819067
EVM0030033	12.4485	15.5405	13.3733	13.7874	6.41682	7.32174	7.18939	6.97598	6.19508	6.73858	7.92066	6.95144	4.35187	4.95321	5.18088	4.82866	6.47247	5.67279	6.22688	6.12405	16.7148	15.4395	15.9048	16.0197	8.52551	8.48475	7.82344	8.2779	9.69471	10.2634	10.8755	10.2779	7.83055	8.17402	7.41913	7.8079	9.31845	8.91494	10.3813	9.53822
EVM0040511	1.23828	1.05651	1.03605	1.11028	0.643961	0.86442	0.594556	0.700979	0.3849	0.180756	0.378789	0.314815	0.465751	0.718524	0.774397	0.652891	0.335395	1.00239	0.819136	0.718973	0.48398	0.816872	0.360568	0.553807	0.436596	0.493068	0.527617	0.48576	0.571279	0.081421	0.391147	0.347949	0.428512	0.489147	0.656297	0.524652	0.469164	0.36214	0.509782	0.447029
EVM0040516	6.04766	5.627	6.62574	6.10013	3.20025	2.75843	3.49269	3.15046	2.4002	2.88429	3.14793	2.81081	1.30597	1.08508	1.35574	1.24893	2.18183	1.84983	1.85909	1.96358	4.31454	4.24268	4.09496	4.2174	3.16087	2.90421	3.30874	3.12461	4.04913	4.31196	3.38733	3.91614	1.87813	2.11215	1.9623	1.98419	2.10422	2.79986	2.2168	2.37362
EVM0040514	1.61903	2.47309	1.37648	1.82287	2.0013	2.38045	2.81735	2.3997	4.39614	4.18768	4.10747	4.23043	1.75486	1.58687	1.74423	1.69532	2.66273	2.48847	2.57981	2.57701	2.524	2.24344	2.58348	2.45031	3.14496	2.61502	2.8136	2.85786	6.39598	7.08591	5.97207	6.48465	2.45631	3.5375	3.2088	3.06754	3.57223	3.02946	2.73362	3.11177
EVM0027671	6.74039	6.84075	6.93508	6.83874	4.88138	5.17203	4.56173	4.87171	5.95936	6.59136	5.82811	6.12628	18.1944	17.4762	18.4223	18.031	15.1685	14.9759	13.1277	14.424	8.66151	8.25187	8.44749	8.45363	3.97799	4.0584	3.85169	3.96269	3.02403	2.95434	3.07165	3.01668	11.255	12.9345	13.1152	12.4349	12.5574	12.5279	11.7682	12.2845
EVM0031923	1.62713	2.76181	0.546994	1.64531	0.915369	2.84648	0.473345	1.41173	0.437941	4.28676	4.12993	2.95155	1.69656	2.42858	2.97872	2.36795	3.60194	0.015175	0.029126	1.21541	1.12993	0.444243	0.5487	0.707625	2.36429	0	0.179648	0.847981	2.80291	3.69327	3.28022	3.2588	2.58778	3.56109	3.06257	3.07048	0.013177	4.02939	3.33288	2.45848
EVM0031922	28.2207	29.5494	31.599	29.7897	27.4595	30.9441	29.5485	29.3174	17.3333	16.5344	16.7953	16.8877	13.3893	14.5305	12.1652	13.3617	11.6298	14.1973	11.8649	12.564	24.449	26.2791	28.9537	26.5606	27.538	27.9428	26.6708	27.3839	19.6866	19.1597	14.664	17.8368	22.3057	20.6085	22.2236	21.7126	14.5628	17.1149	13.0027	14.8935
EVM0031921	1.61782	0.824772	1.00564	1.14941	0.653779	0.760195	1.08143	0.8318	0.836526	0.608805	1.09101	0.845448	0.319388	0.394865	0.278762	0.331005	0.366062	0.83828	1.23986	0.814735	8.02817	8.8066	8.0906	8.30845	7.44742	7.11151	7.18005	7.24633	9.81689	8.6226	8.61614	9.01854	5.32619	6.67143	5.43055	5.80939	8.17382	8.84406	8.61837	8.54542
EVM0042915	1.48757	0.772238	1.24657	1.16879	0.828992	0.742464	0.965111	0.845522	0.283721	0.351302	0.327345	0.320789	0.725418	0.41126	1.08231	0.739663	0.648051	1.72756	0.935912	1.10384	1.24548	0.896235	1.17173	1.10448	0.466064	0.946742	0.577787	0.663531	0.41457	0.403257	0.176087	0.331305	0.708031	0.630612	0.44357	0.594071	1.00321	1.03528	0.802272	0.946919
EVM0042916	5.84932	6.53174	5.80299	6.06135	5.27804	4.56043	3.9394	4.59262	7.13638	6.8973	8.35755	7.46375	8.58596	10.0454	9.92882	9.52007	6.38615	6.61085	7.60963	6.86888	3.95243	3.68723	4.1244	3.92136	4.64121	5.27841	5.46719	5.12894	5.25454	3.80139	4.51948	4.52514	5.09413	6.2778	5.43512	5.60235	5.08852	6.43933	5.50707	5.6783
EVM0042917	3.53815	3.29794	2.03995	2.95868	1.56863	1.38724	0.528517	1.16146	3.02728	3.81583	1.68989	2.84433	7.98089	8.05242	7.32949	7.7876	6.91265	8.20449	7.06407	7.39374	3.36084	2.5523	2.75172	2.88829	2.0075	1.75179	1.65768	1.80566	2.12005	2.72502	1.59785	2.14764	12.884	8.93458	8.8169	10.2118	7.61914	5.93142	7.44092	6.99716
EVM0042912	50.4439	49.1847	45.6008	48.4098	21.6727	26.5869	21.4407	23.2334	34.8254	32.8868	36.9516	34.8879	56.8312	57.6175	51.5408	55.3298	55.9443	58.3271	54.7436	56.3384	40.2414	39.6672	40.3568	40.0885	21.8896	21.4189	17.9336	20.414	30.2855	28.2089	29.8017	29.432	50.7627	45.3433	50.2437	48.7832	44.0948	43.7712	49.0106	45.6255
EVM0044365	2.81052	3.11279	2.73279	2.88537	1.12771	1.28795	0.927717	1.11446	0.298179	0.574903	0.319308	0.397463	0.06658	0.089563	0.229201	0.128448	0.434327	0.948094	1.41665	0.933023	3.62749	3.53375	2.77023	3.31049	2.0184	1.77043	1.79141	1.86008	1.58348	1.88817	1.99267	1.82144	1.57752	1.61818	1.4322	1.54263	1.5786	1.54813	2.5289	1.88521
EVM0044366	1.20362	1.26914	1.16812	1.21363	1.16968	1.85832	2.05402	1.69401	2.66326	2.3927	2.67483	2.57693	2.34752	2.48191	2.67022	2.49988	1.81983	2.73798	2.38672	2.31484	2.35544	2.2035	2.40861	2.32252	2.5559	2.76867	2.51132	2.61196	3.9428	3.74335	3.34409	3.67675	1.96501	2.58885	2.52107	2.35831	3.59532	3.29263	3.35869	3.41555
EVM0044361	1.53366	1.82786	2.2267	1.86274	9.20629	9.07597	9.70578	9.32935	28.3342	26.6133	28.0999	27.6825	6.19567	6.56416	5.47811	6.07931	7.22986	6.38549	6.29758	6.63765	0.965314	0.995052	1.06181	1.00739	5.09992	4.743	4.17108	4.67133	6.36238	7.90731	8.05658	7.44209	6.64127	7.09435	6.47444	6.73669	5.03091	5.60001	5.15572	5.26221
EVM0044360	3.72201	4.00799	4.37168	4.03389	2.67548	3.13619	2.11822	2.6433	1.63171	2.62799	2.53548	2.26506	1.33646	1.84542	1.44744	1.54311	2.06065	2.02841	2.44308	2.17738	4.1716	3.44287	4.28801	3.96749	1.95194	2.88187	2.48117	2.43833	3.44927	2.92391	2.46315	2.94544	1.32613	1.7732	1.78156	1.62696	1.73303	1.69018	2.05511	1.82611
EVM0025789	1.26463	2.28431	1.34969	1.63287	1.53033	1.32307	2.20204	1.68514	0.814861	0.765652	0.529573	0.703362	0.635722	0.597396	0.80959	0.680903	2.11141	0.631807	0.835206	1.19281	1.826	2.62501	2.03773	2.16291	2.30899	2.78163	2.49503	2.52855	2.069	1.61514	2.16924	1.95112	1.47163	1.78346	1.90029	1.71846	1.64029	2.17672	1.95303	1.92335
EVM0044368	0.290064	0.359197	0.456962	0.368741	0.685712	0.80003	0.764007	0.749916	0.728653	0.666233	0.571704	0.65553	0.504204	0.846651	0.68665	0.679168	0.570243	0.667899	0.716933	0.651692	0.493368	0.371028	0.446777	0.437058	0.576118	0.517721	0.596883	0.563574	0.551831	0.4909	0.522774	0.521835	0.361721	0.617854	0.513382	0.497652	0.580679	0.462055	0.815933	0.619556
EVM0056550	15.8971	10.6369	15.1013	13.8784	3.16442	2.85879	4.10797	3.37706	4.97255	2.86609	4.58695	4.14187	4.04927	4.07999	4.37049	4.16658	7.56093	10.1779	7.595	8.44461	11.6674	10.4739	10.6482	10.9298	1.92323	3.95443	1.86109	2.57958	3.99153	3.47115	2.40047	3.28772	6.58716	7.07814	6.02576	6.56369	5.66786	5.75339	7.32262	6.24796
EVM0045115	25.8542	25.2067	24.5456	25.2022	30.3153	28.2849	30.0602	29.5535	55.7598	52.7363	52.7853	53.7604	43.8977	42.6829	41.007	42.5292	32.3731	36.0635	32.453	33.6299	30.7519	26.6165	28.5168	28.6284	29.0492	31.7599	28.1744	29.6612	51.0188	55.6217	52.8968	53.1791	42.3742	42.7234	40.6753	41.9243	40.1449	38.1695	40.1269	39.4804
EVM0038259	3.20041	3.08429	1.58077	2.62182	2.55347	2.97894	2.25936	2.59726	3.65656	4.10209	3.12272	3.62713	5.08198	5.27048	6.10497	5.48581	5.49898	3.48251	3.9191	4.3002	1.39627	1.7841	1.7641	1.64815	2.62168	1.54571	1.34858	1.83866	2.1792	2.49939	1.87869	2.18576	2.04933	3.55744	2.56935	2.72537	2.25932	2.55635	3.14977	2.65515
EVM0016636	2.04376	2.3783	1.2467	1.88958	3.69672	3.72784	3.70002	3.70819	4.42177	3.34569	4.25502	4.00749	2.18197	2.12214	2.22804	2.17738	2.39021	1.26598	3.19659	2.28426	2.41862	2.9903	1.967	2.45864	1.28549	1.51353	2.29561	1.69821	4.4708	3.22537	4.60977	4.10198	1.76716	1.50266	1.61868	1.6295	1.2455	1.14927	2.54068	1.64515
EVM0027675	0.084322	0.146207	0.14521	0.125246	1.70313	1.62711	2.05893	1.79639	0.084881	0.11323	0.181399	0.126503	0.237406	0.078426	0.340568	0.2188	0	0.08599	0.25874	0.11491	0.38938	0.484907	0.442295	0.438861	0.646256	0.670865	0.747823	0.688315	0.333573	0.381357	0.295254	0.336728	0.036967	0.036365	0.121453	0.0649283	0.188516	0.479386	0.233048	0.300317
EVM0044646	3.14373	2.69649	2.74984	2.86335	2.19673	2.66898	3.11523	2.66031	3.40125	4.14379	3.83884	3.79463	5.46196	5.22506	5.57924	5.42208	6.35925	5.70575	5.54346	5.86949	2.13832	2.18232	2.70822	2.34295	1.91798	2.02843	1.47429	1.8069	3.80589	3.02827	3.59271	3.47562	5.00589	4.95871	6.46554	5.47672	4.24863	4.33789	4.20227	4.26293
Salix_babylonica_newGene_10770	0	2.75179	0	0.917265	0	0.537967	0.08806	0.208676	2.38373	2.14492	1.81672	2.11512	3.00345	1.79691	3.07019	2.62352	4.43849	3.50246	3.39584	3.77893	0.553236	0	0.086864	0.213367	0.349074	0.185881	0.344423	0.293126	0	0.147783	0.193236	0.113673	0.090729	0.574286	0	0.221672	0	0.466725	0.364744	0.277156
EVM0027677	0.972203	0.542301	0.833568	0.782691	0.891872	0.666177	0.972242	0.84343	0.631143	0.595919	1.046	0.757688	1.31876	1.82072	1.16366	1.43438	0.945495	0.467365	1.02815	0.813672	0.250069	0.634532	0.49748	0.460694	0	0.639054	0.625316	0.421457	0.398237	0	0.571746	0.323328	0.645247	0.400383	0.57133	0.538987	0.620357	0.656739	0.882878	0.719991
EVM0044647	0.331191	0.356246	0.610109	0.432515	0.128824	0.214636	0.565868	0.303109	0.162409	0.153592	0.387866	0.234622	0.199396	0.16478	0.235846	0.200007	0.090402	0.266053	0.202449	0.186301	1.43661	1.46087	1.52302	1.4735	0.90229	1.01252	0.743023	0.885945	1.0927	0.987821	1.23431	1.10494	1.05092	0.904767	0.767952	0.907879	1.30151	0.969842	1.473	1.24812
EVM0031076	0.623334	0.550149	0.773372	0.648952	0.941703	1.00457	1.07462	1.00696	3.03497	1.43767	1.72968	2.06744	2.57427	3.64793	2.53057	2.91759	4.88951	5.49486	6.37303	5.5858	1.68077	0.833458	1.61976	1.378	0.320081	0.432857	0.826265	0.526401	0.424425	0.764358	1.04591	0.744896	1.36179	1.526	1.14298	1.34359	1.49924	1.8596	1.1138	1.49088
EVM0043351	2.4242	1.78517	1.23175	1.81371	1.2404	0.539219	1.75118	1.17694	0.839514	0.828784	1.6041	1.0908	1.20157	0.303166	0.812734	0.772489	1.03346	1.43371	0.883982	1.11705	1.72974	1.63473	2.29022	1.8849	0.697664	0.345017	0.3797	0.474127	1.25879	0.979611	1.27155	1.16998	0.999705	0.777989	1.05445	0.944048	0.89992	1.57056	1.2415	1.23733
EVM0031079	0.374983	0.675497	0.434804	0.495095	0.428186	0.48942	0.499891	0.472499	0.650076	0.807259	1.15324	0.870191	1.97629	1.90512	2.30652	2.06264	3.05458	4.43693	3.22431	3.57194	1.49015	1.06128	1.47901	1.34348	0.232041	0.101485	0.331238	0.221588	1.09001	0.526217	1.89349	1.1699	3.70376	2.8264	2.58804	3.0394	3.57634	1.73787	2.3454	2.5532
EVM0031078	10.8917	14.6413	10.1367	11.8899	8.11136	11.3892	11.007	10.1692	10.6998	11.3613	11.248	11.103	4.81276	5.03266	4.82898	4.89147	6.2224	4.86519	5.48703	5.52487	7.92642	10.3442	7.26185	8.51082	10.47	11.247	12.4166	11.3778	11.632	12.7578	14.0422	12.8107	10.47	9.1671	7.9048	9.18065	7.75637	5.30391	7.10469	6.72166
EVM0048462	3.24216	2.80766	2.82158	2.95713	1.18046	1.19634	0.833402	1.07007	0.665248	1.10181	0.929091	0.898716	0.650265	0.945193	1.24932	0.948261	1.41564	1.09966	1.20229	1.23919	0.557709	0.654281	0.498125	0.570038	0.665161	0.265001	0.523939	0.4847	0.344596	0.145776	0.46806	0.319477	0.815108	1.01134	0.899906	0.908785	0.596598	0.600528	0.727593	0.641573
EVM0048466	1.66818	1.28147	1.84152	1.59706	0.945417	1.10646	0.767583	0.939819	0.901831	0.861466	1.59199	1.11843	0.855724	0.631407	0.526266	0.671132	0.538219	0.748986	1.0988	0.795336	1.52889	1.4941	1.34822	1.45707	1.6907	1.17041	1.02959	1.2969	1.34639	1.31638	1.81689	1.49322	0.534441	0.54919	0.641827	0.575153	0.667099	0.977583	0.773905	0.806196
EVM0048467	6.11968	6.24399	7.92026	6.76131	3.86838	1.93603	2.06334	2.62258	1.1775	1.53904	2.18545	1.634	1.53636	2.8813	1.53606	1.98457	1.66904	1.94644	2.2896	1.96836	5.98163	7.47042	6.63682	6.69629	2.97774	3.98182	2.94567	3.30174	2.40631	2.67911	2.1324	2.40594	2.96593	2.09199	2.22058	2.42617	2.4094	2.95986	3.19437	2.85454
EVM0048465	1.08433	1.20824	1.47101	1.25453	1.16477	0.991455	1.40527	1.18716	1.82964	2.65384	2.52979	2.33776	0.630956	1.11552	1.07423	0.940235	0.979683	1.1488	1.3852	1.17123	1.27096	1.37505	1.20772	1.28457	1.24494	1.19859	1.38749	1.27701	1.98035	2.62281	2.3841	2.32909	1.27077	1.24447	1.38226	1.29917	1.58772	1.07734	1.22829	1.29779
EVM0047630	6.89999	5.26207	8.51428	6.89211	13.5895	12.2243	9.52829	11.7807	12.8718	9.76796	11.0797	11.2398	3.39409	4.5821	3.77247	3.91622	4.17478	3.67564	5.62953	4.49332	5.94046	8.70835	7.10493	7.25125	5.88269	6.77946	5.306	5.98938	9.15034	10.3297	9.05098	9.51035	5.38561	6.79747	5.33924	5.84077	6.0346	5.42673	5.91768	5.79301
EVM0047631	21.6828	21.5836	19.7893	21.0185	15.7811	15.104	15.5194	15.4682	19.2152	20.3874	18.3322	19.3116	29.4496	30.9992	30.0753	30.1747	28.1636	30.1675	27.5479	28.6263	15.74	16.3857	16.2959	16.1405	14.0561	14.662	12.859	13.859	19.0507	18.8408	15.8457	17.9124	22.3364	23.9913	24.7692	23.699	22.9697	23.0854	22.8952	22.9834
EVM0040543	1.22924	0.954682	1.23634	1.14009	1.4856	1.02587	2.20341	1.57163	1.80279	0.718275	2.2698	1.59695	2.08838	2.47681	2.18971	2.25163	1.97963	1.1266	2.33492	1.81372	0.505009	1.05268	0.717876	0.758521	0.844034	0.362858	0.524441	0.577111	0.626057	0.889541	0.449916	0.655171	0.923904	1.23352	0.587327	0.914918	1.39756	0.640516	0.858323	0.965466
Salix_babylonica_newGene_3030	2.64006	3.23058	2.85542	2.90869	2.16833	3.78849	3.03655	2.99779	3.25842	2.79945	3.90255	3.32014	3.83735	3.29808	3.8474	3.66095	2.50695	2.24987	3.62217	2.793	0	0.624275	0	0.208092	0.772545	0.540368	0	0.437638	0.287031	0	0	0.095677	0	0.380537	0.48463	0.288389	0	0	0.127581	0.042527
EVM0046326	3.22927	3.59504	3.15965	3.32799	1.2346	0.95985	1.2189	1.13778	1.52176	2.03459	1.5082	1.68819	0.757828	0.913127	0.918523	0.863159	1.9909	2.74586	2.02966	2.25547	3.77325	2.39766	3.29046	3.15379	2.01536	3.2369	2.0337	2.42865	2.93388	2.25998	3.31426	2.83604	1.78872	2.40672	2.62226	2.27256	2.60442	1.8295	1.88586	2.10659
EVM0046325	0.102629	0	0.088203	0.0636107	0.373382	0.11358	0.318107	0.268356	0	0.084076	0.110295	0.0647903	0	0	0	0	0	0.193326	0	0.064442	0.370885	0.289238	0.974928	0.545017	2.11167	1.79527	1.90082	1.93592	0.502173	0.842051	0.572638	0.638954	0.654392	0.285127	0.215954	0.385158	0.251961	0.436111	0.180639	0.28957
EVM0046322	1.78525	2.13782	1.22766	1.71691	1.78859	1.11852	2.20627	1.70446	5.19807	3.30852	4.10596	4.20418	1.94447	1.9099	2.79793	2.21743	3.3722	2.44822	2.56478	2.79507	1.93051	1.93306	2.67575	2.17977	1.78649	1.31034	1.57638	1.55774	4.06375	4.22925	4.17685	4.15662	2.78986	3.00764	3.22957	3.00902	3.46405	3.67635	2.45317	3.19785
Salix_babylonica_newGene_3038	3.45234	4.2222	4.84998	4.17484	1.29044	1.49172	1.50729	1.42982	4.13161	3.33827	3.88077	3.78355	2.07231	2.24351	2.27123	2.19569	3.40502	3.98529	3.15231	3.51421	0	0	0	0	0	0	0	0	0	0.062007	0	0.020669	0	0.070156	0	0.0233853	0	0	0	0
Salix_babylonica_newGene_6133	4.63933	4.99007	4.66839	4.76593	2.36982	2.71869	2.58309	2.5572	1.55822	1.36771	2.16934	1.69842	1.21506	1.35592	1.39571	1.32223	2.87965	2.92496	2.62414	2.80958	1.85285	2.09583	2.15401	2.03423	1.63461	2.18432	1.57357	1.7975	0.782073	0.828704	0.503522	0.704766	0.411695	0.447284	0.522952	0.460644	0.655112	1.10692	0.965736	0.909255
EVM0026818	14.4494	16.8228	15.8543	15.7088	82.5439	79.5147	75.1979	79.0855	25.4777	26.185	27.0882	26.2503	36.7302	31.3542	30.735	32.9398	20.483	20.7935	20.166	20.4808	5.54188	5.87262	7.06993	6.16148	23.8967	28.4288	23.7641	25.3632	8.15292	6.85931	7.05696	7.3564	36.1912	25.6484	29.2872	30.3756	28.3402	23.1777	26.8696	26.1292
EVM0047987	5.62784	6.18438	5.36687	5.72636	6.12636	5.70038	6.21911	6.01528	3.91959	5.78189	5.17659	4.95936	2.79535	2.8728	3.55354	3.0739	2.49748	3.26179	3.10499	2.95475	4.38815	4.40288	4.15218	4.3144	4.94936	4.58534	4.63897	4.72456	3.45674	4.64566	5.11309	4.40516	1.67827	2.1196	2.07107	1.95631	2.50508	1.85541	2.05389	2.13813
EVM0047981	4.41414	3.58093	4.67057	4.22188	5.38252	5.24745	4.85919	5.16305	4.11567	3.85794	1.95524	3.30962	1.32243	1.62884	2.17789	1.70972	2.69713	2.16011	2.51818	2.45847	3.63912	3.98986	3.88246	3.83715	6.1251	4.568	5.27157	5.32155	2.6444	3.41494	3.02068	3.02667	1.78069	1.64529	1.19354	1.53984	1.55339	1.28457	1.87329	1.57042
EVM0047982	21.7297	26.183	18.3208	22.0778	16.5345	17.9852	16.5297	17.0165	6.66749	8.48932	7.55353	7.57011	10.6942	9.59565	7.55394	9.28127	13.0931	14.0271	12.8736	13.3313	7.51111	6.84883	7.83061	7.39685	4.71247	5.39455	4.66941	4.92547	3.59324	3.46667	3.4356	3.4985	1.47229	0.851437	1.35824	1.22732	1.63996	2.16588	1.52791	1.77792
EVM0047983	2.0498	1.99847	2.39346	2.14724	2.17323	1.91993	1.85186	1.98168	2.09461	1.60169	2.22714	1.97448	2.09663	1.21973	1.36036	1.55891	1.7253	1.1052	1.17742	1.33597	1.16739	1.34822	1.4679	1.32784	0.729828	0.650062	0.74173	0.707207	1.30085	1.43392	1.14093	1.2919	1.31671	0.97936	1.1536	1.14989	1.30034	1.44742	1.03234	1.26003
Salix_babylonica_newGene_8663	0.896372	0.732847	1.79477	1.14133	0.726454	1.02988	0.655396	0.80391	1.52515	1.57634	1.11797	1.40648	1.61139	1.19769	1.55528	1.45478	0.779541	1.6645	1.89647	1.44684	0	0	0	0	0	0	0	0	0	0	0	0	0	0	0	0	0	0	0	0
Salix_babylonica_newGene_8667	2.88662	1.6341	2.09586	2.20553	1.19115	1.4705	1.78871	1.48345	6.51187	1.92423	2.86275	3.76628	4.36045	3.8359	3.23519	3.81051	2.82641	2.81712	3.44781	3.03045	0.036882	0.101378	0.022352	0.0535373	0.021409	0.063052	0.03573	0.0400637	0.051535	0.014108	0	0.021881	0.087337	0.012251	0.023141	0.0409097	0.039042	0.098692	0.033632	0.057122
Salix_babylonica_newGene_4569	26.7087	28.4475	23.6822	26.2795	20.4822	22.6216	19.3496	20.8178	15.8052	13.0383	15.2888	14.7108	15.1508	17.3749	16.6183	16.3814	14.8342	15.4099	14.6971	14.9804	25.9475	27.8449	27.079	26.9571	41.9256	44.352	43.1826	43.1534	19.3802	19.5702	20.9643	19.9716	32.1049	30.3427	32.2963	31.5813	29.1049	27.6101	26.9484	27.8878
EVM0042008	2.8283	2.75316	3.4946	3.02535	1.39548	1.63391	2.18074	1.73671	1.23289	1.71423	1.85015	1.59909	0.776929	1.16011	1.11773	1.01826	1.49848	1.94752	1.55461	1.66687	1.96263	2.75303	2.62284	2.44617	1.53693	1.42245	1.19258	1.38399	1.02836	1.57103	1.27249	1.29063	0.910316	1.11096	0.767234	0.929505	1.43738	1.15653	1.10802	1.23398
EVM0032529	1.19977	1.21154	2.35771	1.58967	1.85328	2.14323	2.24957	2.08203	1.08667	1.20065	1.36348	1.21693	1.43419	1.3113	0.249618	0.998367	0.730007	1.31777	0	0.682592	2.03495	2.51175	2.47538	2.34069	3.7336	1.11316	2.60261	2.48312	2.43917	3.5272	2.16586	2.71075	0.512616	0.786902	0.587883	0.629134	1.14135	1.04733	0.303984	0.830885
EVM0032522	18.5795	19.3616	17.0528	18.3313	31.7294	35.0227	29.9813	32.2445	56.6793	56.6941	56.2542	56.5426	34.8839	34.2668	34.3088	34.4865	22.0483	23.725	22.1768	22.65	21.6819	20.5191	21.4052	21.202	47.6592	53.8295	54.7025	52.0638	67.8061	75.1349	79.2651	74.0687	39.2265	36.8311	43.2708	39.7762	33.5502	33.2482	38.5989	35.1325
EVM0042000	1.35332	1.71517	1.95896	1.67582	1.31774	0.728033	1.14874	1.06483	1.37238	1.15452	1.78317	1.43669	0.623525	0.432536	0.524083	0.526715	1.45	1.17294	1.54948	1.39081	1.5791	1.37039	1.41399	1.45449	0.685644	0.800856	0.565381	0.68396	0.785562	0.665996	1.80006	1.08387	0.303149	0.562447	0.538712	0.468103	0.941002	0.738275	0.956349	0.878542
EVM0032525	73.2042	75.7585	72.0777	73.6801	63.1568	62.9295	57.8559	61.3141	42.9242	45.8337	42.2253	43.6611	55.731	49.971	52.7807	52.8275	89.3225	89.4513	90.6727	89.8155	105.646	102.569	100.672	102.962	63.1573	63.7191	64.035	63.6371	55.4734	57.0133	58.4812	56.9893	104.716	103.285	107.207	105.069	90.7173	93.9878	89.7398	91.4816
Salix_babylonica_newGene_3642	36.2998	36.1979	39.3166	37.2714	25.0604	21.1572	27.2958	24.5045	19.0939	19.5586	21.9539	20.2022	13.4286	14.2461	13.3772	13.684	14.7843	14.933	12.1303	13.9492	30.3166	27.6406	29.5538	29.1704	26.702	25.0684	24.9974	25.5893	18.6666	16.8249	19.2822	18.2579	18.5703	19.2111	19.5835	19.1216	13.6853	13.8262	12.3009	13.2708
EVM0053607	5.02266	4.11902	4.60049	4.58072	3.45965	3.90388	2.72537	3.36297	2.81547	2.45938	3.07137	2.78207	1.97404	1.82556	2.11651	1.97204	3.35608	3.27582	2.93728	3.18973	3.6983	4.45726	3.88922	4.01493	5.06295	5.03497	4.06757	4.72183	4.39612	3.9374	4.60402	4.31251	2.7133	3.03448	3.24526	2.99768	4.07961	3.96534	3.64089	3.89528
EVM0054058	5.62291	4.9882	5.79409	5.4684	6.14188	4.80955	5.23646	5.39596	3.29632	3.30708	4.62825	3.74388	5.58242	8.25812	5.76744	6.536	9.70622	9.59366	8.72484	9.34158	7.27632	6.9496	7.41337	7.2131	4.68543	5.3918	5.55929	5.21217	4.11012	4.58827	4.70844	4.46894	5.93874	7.53509	7.36171	6.94518	8.2746	6.12329	7.19313	7.19701
EVM0054059	4.27681	5.42625	4.24844	4.6505	4.70248	4.45925	4.78468	4.6488	5.52627	4.61255	5.89966	5.34616	2.72128	2.89226	1.97791	2.53048	3.50059	4.66309	2.71107	3.62491	1.97338	2.18706	2.52096	2.22713	3.82808	3.27759	3.72991	3.61186	4.61477	4.67212	3.82337	4.37009	2.31751	3.39314	3.03295	2.91453	3.91494	2.88789	2.30463	3.03582
EVM0046150	24.4171	22.442	21.9374	22.9322	16.0511	15.3142	15.5517	15.639	26.7595	23.394	26.2896	25.481	43.3263	36.6798	38.6796	39.5619	35.8154	33.1548	37.9653	35.6452	40.1527	37.8836	38.6537	38.8967	27.3328	26.8668	24.7009	26.3002	36.5715	37.7207	37.5117	37.268	44.293	43.3	43.8065	43.7998	38.5566	39.9251	39.776	39.4192
EVM0054054	1.64294	1.81546	1.54759	1.66866	1.72569	1.41124	1.40569	1.51421	1.33245	1.63431	1.13834	1.36837	0.661028	0.816836	0.898176	0.792013	1.10765	1.25682	0.539056	0.967843	0.638352	1.03095	0.834911	0.834739	0.355984	0.321646	0.601908	0.426513	0.272996	0.484519	0.387612	0.381709	0.04396	0.252907	0.538666	0.278511	0.502387	0.349893	0.812656	0.554979
EVM0054052	7.36393	7.4954	5.96703	6.94212	21.2387	19.7595	17.4716	19.4899	24.5878	27.8489	29.0041	27.1469	48.2801	54.7084	52.4997	51.8294	47.0874	52.7011	44.9984	48.2623	12.1134	8.25895	10.5767	10.3164	23.4786	27.2182	25.9116	25.5361	22.9272	27.0216	27.6951	25.8813	51.215	55.2087	52.5911	53.0049	40.012	42.6668	42.5577	41.7455
EVM0046581	3.07671	3.01574	3.32261	3.13835	1.3246	1.07996	1.17912	1.19456	0.574378	0.842771	0.652377	0.689842	0.686053	0.610366	1.10731	0.801244	0.919647	0.682485	1.0322	0.878109	1.11546	0.780214	0.84037	0.912014	2.73851	2.73439	2.93445	2.80245	0.761529	0.619831	0.839065	0.740142	0.411554	0.538595	0.34518	0.431776	0.831325	0.892883	1.14374	0.955982
EVM0046585	0.985722	0.670919	0.779563	0.812068	0.409595	0.327838	0.36314	0.366858	0.200629	0.152934	0.0771	0.143554	0.239996	0.159727	0	0.133241	0.611846	0.463589	0.383057	0.486164	1.35715	1.33489	1.25204	1.31469	0.432094	0.346624	0.436916	0.405211	0.447022	0.153472	0.132928	0.244474	0.083217	0.2203	0.731802	0.345106	0.865537	0.513083	1.51586	0.964827
EVM0046584	8.02659	5.93824	7.87098	7.2786	16.3352	15.2846	16.9652	16.195	44.7879	43.6406	42.8456	43.758	50.4302	54.8466	51.4251	52.234	32.9099	38.1054	41.0458	37.3537	15.3256	15.3493	13.4522	14.709	32.7086	31.5484	32.5918	32.2829	56.5974	56.598	53.3276	55.5077	77.897	72.1132	82.6254	77.5452	68.5303	68.2239	67.6724	68.1422
EVM0032721	0.859757	0	0	0.286586	1.42085	0.102107	0	0.507651	1.07589	0.408823	0.315572	0.600096	0	1.00201	0	0.334003	0.268298	1.04958	0	0.439294	0	2.32156	0.532732	0.95143	4.15419	2.27273	3.10575	3.17756	1.28639	3.37333	4.17264	2.94412	2.71217	1.91021	2.8811	2.50116	2.66059	3.29278	2.40172	2.78503
EVM0041674	0.985189	1.41881	1.64671	1.35024	1.90587	0.917354	1.38252	1.40191	1.45858	1.03763	1.27523	1.25715	0.762274	0.563293	0.409646	0.578404	0.63274	1.49613	0.944328	1.0244	3.30219	4.19655	3.06608	3.52161	2.90808	1.41791	1.61123	1.97907	2.03474	1.95525	3.01513	2.33504	1.24059	1.08848	0.79841	1.04249	1.52039	1.08566	0.684997	1.09702
EVM0041675	5.71439	6.51967	5.52476	5.91961	6.94447	5.94845	6.12876	6.34056	6.24362	6.06129	5.90074	6.06855	2.05574	2.06455	2.05202	2.05744	1.84541	2.56576	1.64364	2.01827	4.93582	4.94398	4.72568	4.8685	5.38888	5.97683	5.69989	5.68854	5.34375	5.02315	5.48997	5.28562	2.40895	2.2592	2.25981	2.30932	1.90346	2.27495	2.01095	2.06312
EVM0030807	3.95763	3.02779	4.1641	3.71651	2.27817	2.32252	2.03088	2.21052	0.499702	1.5525	1.82162	1.29127	1.39222	1.49059	1.96898	1.61726	2.09822	2.92262	3.92104	2.98062	3.16309	3.76504	3.12525	3.35112	2.50146	1.45073	1.71894	1.89038	1.4543	1.73106	1.7562	1.64719	2.03252	1.76831	1.53405	1.77829	3.21193	3.23688	4.119	3.5226
EVM0041671	0.951069	1.17674	0.820838	0.982882	0.532877	0.467633	0.933898	0.644803	1.46191	0.801161	1.01547	1.09285	0.381356	0.359922	0.42964	0.390306	0.999819	0.512671	0.567336	0.693275	2.09005	1.89362	1.88315	1.95561	0.823654	0.213432	0.569179	0.535422	1.22684	1.07079	1.30616	1.20127	0.965891	1.13824	0.979351	1.02783	0.845315	0.738105	1.10097	0.894796
EVM0030804	5.38048	6.63697	5.57011	5.86252	4.90789	5.53746	5.25945	5.23493	4.71739	4.24713	4.358	4.44084	3.29058	2.85577	3.92269	3.35634	5.39178	5.53767	5.01213	5.31386	14.5879	16.4902	16.1128	15.7303	4.30514	4.99966	3.7842	4.363	3.02679	5.52728	3.95161	4.16856	3.53906	4.12314	4.88253	4.18157	3.98831	3.86756	5.82509	4.56032
EVM0030808	6.15836	6.38813	6.50753	6.35134	5.41784	5.12545	5.58071	5.37467	13.8238	14.3574	13.012	13.7311	11.6592	13.1876	11.2664	12.0378	10.9639	11.744	12.2458	11.6512	6.5375	8.0778	8.53405	7.71645	3.78822	4.69747	4.23068	4.23879	11.4388	14.0296	13.1973	12.8886	12.7789	13.4589	11.5622	12.6	9.77657	9.93475	7.9443	9.21854
EVM0041678	0.770388	0.496169	0.651889	0.639482	1.02338	1.29055	1.31202	1.20865	1.11837	0.989351	1.07025	1.05932	1.19819	1.67194	1.61791	1.49602	0.461729	0.40969	0.784702	0.55204	0.308821	0.344536	0.33912	0.330826	0.484574	0.366884	0.422807	0.424755	0.327969	0.377895	0.457977	0.387947	0.425765	0.558532	0.459385	0.481227	0.384581	0.416126	0.173975	0.324894
EVM0040981	0.576581	0.438163	0.35978	0.458175	0.338361	0.441552	0.477966	0.419293	0.455644	0.380271	0.264066	0.36666	0.472272	0.642595	0.377165	0.497344	0.634	0.438504	0.539187	0.53723	1.40748	1.08322	0.474448	0.988382	0.838022	1.1771	1.03053	1.01522	0.668753	0.921272	0.240162	0.610062	0.677977	0.513785	0.792056	0.661273	0.601161	0.525119	0.948583	0.691621
EVM0040980	1.01971	1.05414	1.02815	1.034	0.624685	0.582538	0.958162	0.721795	1.66992	1.75458	1.14941	1.52464	2.39681	2.59076	3.72537	2.90431	3.63573	3.61762	4.62794	3.96043	2.92892	2.34285	2.40582	2.5592	0.760165	0.684164	0.75288	0.732403	2.28277	2.07318	2.71897	2.35831	3.67706	2.43506	2.99652	3.03621	3.94481	4.2567	3.9248	4.0421
EVM0040983	2.85679	2.94529	2.84295	2.88168	8.72313	6.96026	8.10295	7.92878	4.57805	5.62344	5.75218	5.31789	8.15139	5.82766	6.09603	6.6917	2.05196	2.02269	2.76066	2.27843	7.70905	7.18894	5.19667	6.69822	35.0699	34.4138	36.7537	35.4125	6.91824	5.02737	7.03924	6.32828	13.8532	16.1746	17.0029	15.6769	8.18171	6.86165	8.47103	7.83813
EVM0036316	114.591	112.526	112.764	113.294	110.817	108.232	106.087	108.378	44.7514	46.8809	44.6372	45.4232	20.3476	21.9261	22.5863	21.62	30.9664	33.4386	32.7631	32.3894	174.482	167.505	169.456	170.481	189.872	184.938	182.261	185.69	98.1137	96.9726	95.8197	96.9687	102.853	105.617	101.273	103.248	82.2363	85.182	86.6906	84.703
EVM0002830	1.29929	1.37517	0.89766	1.1907	1.29888	0.919132	1.3325	1.18351	2.33875	2.17592	2.04428	2.18632	1.20877	1.40509	1.12716	1.247	1.80762	0.975616	1.37199	1.38508	1.54798	1.51502	1.40527	1.48942	1.39277	1.57615	1.26307	1.41066	3.18056	3.57361	2.79178	3.18198	1.58994	1.15626	1.00349	1.2499	1.99653	1.85358	2.11673	1.98895
Salix_babylonica_newGene_3574	0.256309	0.666755	0.370654	0.431239	0.165819	0.558161	0.23523	0.319737	0.323451	0.624205	0.307331	0.418329	0.496419	0.839873	0.256169	0.53082	1.11801	0.489237	1.36061	0.989285	1.4654	1.39562	1.91433	1.59178	0.800192	1.45815	0.885602	1.04798	0.785454	0.939143	1.79356	1.17272	1.28356	0.948485	0.606764	0.946269	0.674587	2.21395	1.49931	1.46262
EVM0036318	1.60347	1.68569	1.76296	1.68404	1.14972	1.30497	0.747009	1.06723	0.354322	0.91089	0.621076	0.628763	0.829642	0.50218	0.388279	0.573367	0.708351	0.99832	1.29142	0.999364	1.08317	0.446123	0.72807	0.752456	0.511821	0.500625	0.471058	0.494501	0.259671	0.32976	0.222754	0.270728	0.150336	0.366239	0.366978	0.294518	0.270669	0.358725	0.113802	0.247732
EVM0041580	0.650997	0.610839	0.604998	0.622278	0.385265	0.48376	0.367881	0.412302	0.704277	0.480436	0.879016	0.68791	0.555635	0.631306	0.67331	0.620084	0.829024	0.605055	0.905241	0.779773	0.94672	0.809631	1.12319	0.959845	0.480484	0.373967	0.400526	0.418326	0.733509	0.74956	0.848764	0.777278	0.590298	0.726598	0.744517	0.687138	0.79606	0.706506	0.633543	0.712036
EVM0030447	2.76622	3.00283	2.54075	2.76993	1.17388	1.08735	1.09762	1.11962	0.911904	1.16282	0.831353	0.968691	2.55214	2.44213	2.11632	2.37019	3.43685	3.75226	3.77353	3.65421	3.59309	2.88811	4.21026	3.56382	1.31804	1.53464	1.34813	1.40027	1.72713	1.77304	1.58888	1.69635	3.70953	2.88261	3.37623	3.32279	2.82061	3.15548	3.0834	3.01983
EVM0025395	0.832265	1.35273	1.05372	1.07957	2.13452	1.88739	1.88499	1.96897	1.43185	1.21628	1.45177	1.36663	1.91935	0.914779	1.23487	1.35633	1.30196	1.01668	1.3015	1.20671	1.70373	1.01025	1.11965	1.27788	3.02717	3.00605	2.64091	2.89138	1.32284	1.12505	1.17554	1.20781	1.45522	1.66947	0.907107	1.34393	1.19766	1.63381	0.913123	1.2482
EVM0017947	1.08081	1.01647	1.23084	1.10937	0.421734	0.373378	0.337901	0.377671	0.743823	0.970938	1.19313	0.969297	0.326704	0.307419	0.070854	0.234992	0.370421	0.535392	0.48536	0.463724	0.120775	0.09132	0.060885	0.0909933	0.062111	0.179332	0.041766	0.094403	0.164803	0.136263	0.106395	0.13582	0	0.041805	0	0.013935	0	0.170683	0	0.0568943
EVM0017941	1.2318	0.962835	0.465351	0.886661	0.588103	0.490325	1.12665	0.735026	1.7512	0.668599	0.185963	0.868587	1.73227	1.21164	1.99103	1.64498	1.43431	0.470187	0.78015	0.894884	0.73185	0.890617	0.70345	0.775306	0.578932	0.302713	2.357	1.07955	0.456447	0.499609	2.06061	1.00556	0.93419	0.592206	0.537286	0.687894	0	0.534908	2.41791	0.984271
EVM0014412	46.5917	44.9328	45.5823	45.7023	40.3237	41.1088	38.2558	39.8961	14.7859	15.9745	17.777	16.1791	9.03796	9.90923	8.27723	9.07481	13.6474	11.5682	16.5617	13.9258	37.0995	33.3588	32.9693	34.4759	36.7842	35.9174	34.5145	35.7387	17.2533	17.8353	18.2932	17.7939	15.42	13.5161	14.0904	14.3422	13.0893	13.3328	13.5567	13.3263
EVM0014415	25.0938	30.4753	26.2357	27.2683	43.3764	42.4094	44.172	43.3193	32.2528	33.3495	33.4593	33.0205	17.1029	17.0523	15.8814	16.6788	19.9306	19.9092	17.497	19.1122	26.5987	26.896	30.7459	28.0802	38.2264	48.8819	46.8621	44.6568	43.9379	52.8096	45.0829	47.2768	28.2243	27.0352	24.9811	26.7468	23.0915	21.0092	25.9926	23.3644
EVM0014419	1.30644	1.39606	1.54241	1.41497	0.728147	0.69847	0.922889	0.783169	0.572894	0.71372	1.06961	0.785407	0.230204	0.165519	0.264173	0.219965	0.482024	0.677898	0.417717	0.52588	1.55084	1.61089	1.58296	1.58157	1.18418	0.672975	0.952225	0.936461	0.913238	1.04457	1.12886	1.02889	0.489761	0.486866	0.395319	0.457315	0.979369	0.611096	0.734781	0.775082
EVM0049144	3.86515	3.78816	4.06006	3.90446	3.06351	2.44707	2.70492	2.7385	5.27278	5.53746	6.66188	5.82404	5.09321	4.87395	4.62616	4.86444	6.92189	6.13498	6.5476	6.53483	6.64324	6.6643	7.02654	6.77803	3.2763	2.88561	2.60655	2.92282	8.18619	8.01463	7.98989	8.06357	7.24567	7.1398	7.12107	7.16885	9.13126	8.55556	7.71706	8.46796
EVM0055090	3.79673	3.74173	4.56816	4.03554	10.1799	8.9323	8.51228	9.20815	3.05998	3.12413	3.46635	3.21682	3.70221	3.48683	3.30347	3.4975	2.26641	2.03109	2.41801	2.2385	4.10049	3.91817	4.03698	4.01855	9.70573	10.5724	10.5107	10.2629	2.13147	2.67255	2.76326	2.52242	3.70634	3.98195	4.43297	4.04042	2.58809	3.28117	3.24916	3.03947
EVM0055092	17.3084	15.7514	18.0346	17.0315	19.0231	17.6848	20.5762	19.0947	11.9584	12.6591	11.7401	12.1192	2.27146	2.07529	2.23288	2.19321	3.85221	3.31442	2.16846	3.1117	5.78731	7.36864	6.50459	6.55352	4.18456	4.30102	5.64706	4.71088	3.29572	3.05147	4.12052	3.48924	0.920605	1.50412	0.921868	1.11553	0.806107	1.13152	0.818278	0.918637
EVM0055094	11.1211	10.6918	9.96572	10.5929	16.0123	16.5536	18.5329	17.0329	9.55338	12.1143	12.4698	11.3791	6.57138	7.34075	8.1318	7.34798	8.54083	7.60128	7.62593	7.92268	10.1069	9.55137	10.1725	9.9436	14.7875	15.2845	13.3957	14.4892	11.5211	10.8622	11.358	11.2471	8.37663	8.70294	8.93721	8.67226	8.51595	10.4694	8.31532	9.10023
EVM0055096	0.269956	0.347434	0.634569	0.41732	0.036423	0.044086	0.083952	0.0548203	0.446663	0.299104	0.385995	0.377254	1.04913	0.780729	0.961215	0.930357	0.576966	0.490733	1.26521	0.777637	0.156111	0.363365	0.485141	0.334872	0.233613	0.07644	0.234538	0.18153	0.077066	0.172757	0	0.0832743	0.288003	0.287708	0.67084	0.415517	0.764695	0.630705	0.452237	0.615879
EVM0037047	3.68802	4.2489	5.28491	4.40728	5.69049	4.44277	4.66979	4.93435	3.09545	3.54634	3.40303	3.34828	1.94901	2.01586	1.49282	1.81923	3.73227	3.30193	2.94833	3.32751	5.09571	4.0682	4.43654	4.53348	3.61055	3.70921	3.25982	3.52653	2.7126	2.45023	2.72581	2.62955	1.01585	0.986674	1.01533	1.00595	0.917715	1.23829	1.21192	1.12264
EVM0037045	3.00716	4.05559	3.20988	3.42421	1.69693	2.03419	1.4399	1.72368	1.14312	1.42744	1.13567	1.23541	0.803615	0.959317	0.598455	0.787129	1.0632	1.0835	0.529734	0.892144	2.74242	2.03518	2.6748	2.48413	1.66569	1.68169	1.28814	1.54517	1.71609	1.77029	1.59918	1.69518	0.576447	1.11503	0.877547	0.856342	1.07462	1.46652	1.10342	1.21485
EVM0005454	22.8316	27.214	24.072	24.7058	9.24556	8.22302	6.01271	7.8271	1.64637	1.17454	1.17706	1.33266	0.653013	1.63199	1.40125	1.22875	1.09395	1.48818	0.626353	1.06949	4.22659	3.88617	3.47007	3.86094	14.6699	14.2407	14.7458	14.5521	1.75417	0.402489	1.01539	1.05735	2.13111	1.68318	1.48857	1.76762	1.82377	1.28845	2.71254	1.94159
EVM0049140	5.98052	5.56409	4.55613	5.36692	8.61492	5.62108	5.25891	6.4983	4.80634	4.10708	2.54712	3.82018	4.54735	4.64394	5.96096	5.05075	6.30608	9.40496	8.19296	7.968	3.19032	4.36477	4.42474	3.99328	7.44726	6.55215	6.46858	6.82266	15.8995	13.5521	18.592	16.0145	12.1337	9.81585	7.49245	9.81399	15.8582	21.3122	22.0545	19.7417
EVM0024836	7.37004	7.7438	7.02218	7.37867	2.80505	2.08619	1.952	2.28108	5.78349	6.0339	2.97404	4.93048	3.88925	2.8564	3.99769	3.58111	3.06804	1.90069	1.96895	2.31256	3.12392	3.3945	1.73263	2.75035	1.17302	0.927136	1.38139	1.16052	0.564055	0.684398	0.180719	0.476391	0.465273	0.199558	0.23257	0.299134	0	0	0.256704	0.085568
EVM0044393	5.27181	4.90102	5.68367	5.2855	5.40788	4.58841	5.69896	5.23175	7.83305	9.9135	8.85225	8.86627	11.4079	12.8348	12.5255	12.256	10.2038	9.51952	8.41824	9.38051	4.7759	4.24028	5.33817	4.78478	5.02573	5.02238	4.8647	4.97094	7.06326	8.12567	8.05329	7.7474	11.1215	10.957	11.3277	11.1354	8.25561	10.1454	7.8004	8.73382
EVM0049148	1.45984	0.994003	1.27852	1.24412	0.357484	0.602479	0.815253	0.591739	0.362079	0.281637	0.502307	0.382008	0.319161	0.097558	0.131434	0.182718	0.566404	1.01513	0.596895	0.726143	1.25735	1.0934	1.64294	1.33123	0.60826	1.04665	0.942599	0.865835	0.864954	0.623878	0.804884	0.764572	0.680577	0.27107	0.344046	0.431898	0.407236	0.724502	0.852889	0.661542
EVM0049149	26.8866	24.1009	24.2653	25.0843	17.6515	18.7607	18.4063	18.2728	9.90705	10.2471	9.07184	9.742	26.1632	23.5455	24.4111	24.7066	19.8335	22.704	23.7793	22.1056	23.7708	24.4675	23.0366	23.7583	18.3217	17.5315	17.5365	17.7965	5.21448	5.02155	5.38627	5.20743	19.5214	22.1396	22.4217	21.3609	22.114	20.8068	20.5537	21.1582
Salix_babylonica_newGene_5743	6.82712	2.02413	2.40053	3.75059	1.97833	1.68368	1.25116	1.63772	1.58033	4.82669	1.36031	2.58911	2.05891	1.7339	1.97064	1.92115	1.24625	1.94159	2.13128	1.77304	0	0	0	0	0	0	0	0	0	0	0	0	0	0	0	0	0	0	0	0
EVM0006998	1.74255	1.83181	1.30831	1.62756	1.44529	1.27353	0.844156	1.18766	1.24425	1.19733	1.30947	1.25035	0.939198	1.54422	0.797474	1.09363	1.21173	0.716789	0.906628	0.945049	0.058597	0	0	0.0195323	0	0	0	0	0	0	0.119088	0.039696	0.08383	0	0	0.0279433	0	0	0.073434	0.024478
Salix_babylonica_newGene_1044	4.39405	4.23418	4.69449	4.44091	2.08518	1.74175	2.92835	2.25176	1.80556	2.42923	2.09357	2.10945	4.57252	3.37742	4.03454	3.99483	4.76979	3.36128	4.21244	4.1145	6.29774	7.08212	6.84625	6.74204	2.59	3.23303	2.87767	2.90023	4.6279	3.60539	4.49457	4.24262	6.24043	6.39527	6.71676	6.45082	8.11568	6.97889	5.16036	6.75165
EVM0006997	9.21638	9.66933	10.0538	9.64652	14.3148	8.21334	7.64344	10.0572	7.44049	7.08582	7.28334	7.26988	5.09718	3.11167	4.08842	4.09909	9.17358	10.152	13.142	10.8225	3.47013	2.02527	1.34454	2.27998	30.2268	34.3362	23.931	29.498	19.7875	43.6759	30.1886	31.2173	11.6936	12.78	15.7238	13.3991	48.3489	46.5888	54.9209	49.9529
EVM0006991	1.65917	1.38535	1.28514	1.44322	1.71799	1.34358	2.33799	1.79985	2.08585	1.98044	1.66287	1.90972	0.71039	1.34867	1.57176	1.21027	2.11693	1.52101	1.92116	1.85303	2.72298	2.91036	3.8877	3.17368	4.03405	3.96156	3.16609	3.72057	6.76475	7.21638	6.01643	6.66585	4.45579	2.85612	3.4934	3.60177	3.8242	3.3511	3.13217	3.43582
EVM0006992	0.853883	0.917406	1.25692	1.0094	2.19209	3.21382	3.06832	2.82474	1.6465	1.57444	1.4764	1.56578	1.66145	1.61361	1.12781	1.46762	1.98446	1.87259	1.35822	1.73842	0.761478	1.41859	1.08319	1.08775	1.977	2.10473	2.02814	2.03662	1.25293	1.3767	1.66565	1.43176	0.746873	0.932321	1.23119	0.970128	1.20301	1.70133	1.75749	1.55394
Salix_babylonica_newGene_511	22.5323	17.7512	22.6218	20.9684	16.5256	18.4314	15.1364	16.6978	15.3112	12.701	12.5659	13.526	15.7684	12.1027	11.7132	13.1948	12.7188	13.9862	12.174	12.9596	17.4019	14.6779	15.3387	15.8062	56.2265	55.031	55.7117	55.6564	39.9981	46.5822	42.9147	43.165	52.6533	40.8602	45.8497	46.4544	66.5922	69.3461	62.8653	66.2679
Salix_babylonica_newGene_510	12.4694	9.13236	13.1672	11.5896	7.27683	7.8725	10.7256	8.62498	6.71662	6.1941	4.75013	5.88695	6.74528	7.12069	8.10791	7.32463	5.83684	10.1703	6.83587	7.61435	7.08806	8.56107	8.84541	8.16485	31.0828	32.5379	34.5232	32.7146	21.9413	24.2734	24.1492	23.4546	20.3564	21.2924	27.2399	22.9629	33.8198	37.8243	36.5473	36.0638
Salix_babylonica_newGene_6214	3.70251	3.3312	4.22595	3.75322	4.76192	4.16201	5.80109	4.90834	3.57365	3.86173	3.36929	3.60156	5.67667	4.04035	4.7049	4.8073	3.23054	4.39248	4.36125	3.99476	0	0	0.033838	0.0112793	0	0	0	0	0	0	0	0	0	0	0	0	0	0	0	0
EVM0006667	0.06278	0.193955	0	0.0855783	0.190661	0.199843	0.495772	0.295425	0.596358	0.193998	0.239696	0.343351	0.857444	0.177105	0.11882	0.384456	0.405484	0.20081	0	0.202098	1.03221	0.952391	0.592235	0.858944	0.836311	0.639336	0.684504	0.72005	0.372038	1.24368	1.03161	0.882443	1.53329	2.90928	2.84159	2.42806	1.08096	1.15387	1.32627	1.18703
EVM0006662	3.15932	3.19716	2.76496	3.04048	5.70838	5.44531	5.36792	5.5072	3.931	4.0585	3.5712	3.85357	3.58689	3.95375	2.8093	3.44998	3.3087	3.17074	3.08602	3.18849	2.13984	1.84081	1.91764	1.9661	3.73551	5.70999	4.61049	4.68533	3.5225	4.03768	4.29674	3.95231	3.45926	2.96089	2.08673	2.83563	1.85502	2.42358	2.54786	2.27549
EVM0006668	47.2475	45.4198	53.537	48.7348	49.0648	49.57	47.2449	48.6266	116.131	105.914	113.262	111.769	92.5	89.2515	89.5054	90.419	62.7765	68.967	64.508	65.4172	27.4638	18.0906	23.482	23.0122	24.0688	18.8067	26.1955	23.0236	59.8543	48.9211	58.9907	55.922	42.3258	36.4083	41.6982	40.1441	42.5774	44.4923	31.4904	39.5201
EVM0006669	0.256559	1.60919	0.813887	0.893212	1.98864	2.13124	2.07631	2.06539	1.03112	0.724838	1.15229	0.969414	1.45619	1.58768	1.05599	1.36662	1.27923	1.01297	1.40672	1.23297	0.86681	1.6273	1.34418	1.27943	1.58676	3.34361	3.46358	2.79798	1.61315	1.73448	1.7939	1.71385	1.58624	1.93058	1.67275	1.72986	2.31677	1.59131	1.98341	1.96383
EVM0004294	0.29013	0.441403	0.758154	0.496562	0.301875	0.789119	0.572714	0.554569	1.21242	1.47147	1.35312	1.34567	1.32039	2.149	0.921821	1.46374	1.30412	0.891863	1.62364	1.27321	1.3443	1.17332	1.06092	1.19285	0.447614	0.606138	0.670453	0.574735	1.25621	0.910936	0.842397	1.00318	1.27638	1.11691	1.86745	1.42024	1.35737	1.54557	1.80102	1.56799
EVM0004297	2.04142	1.35293	2.96419	2.11951	1.47605	1.01444	0.94938	1.14662	0.80347	0.767755	0.879545	0.816923	1.38032	1.63096	1.29533	1.43553	3.17304	2.27039	2.58188	2.6751	1.245	1.89553	2.281	1.80718	3.00412	1.90572	3.08595	2.66527	3.0872	1.63378	1.94721	2.22273	4.3909	4.16046	3.77663	4.10933	5.04759	5.3751	4.02484	4.81584
EVM0004291	1.05389	2.22762	1.21015	1.49722	0.637659	0.509728	0.941757	0.696381	3.01227	1.92918	1.16187	2.03444	0.934594	1.52011	1.23778	1.23083	1.68008	1.49896	0.923473	1.3675	0.590166	0.741608	0.815111	0.715628	0.861593	0.401361	0.389166	0.550707	0.909477	1.97538	2.35606	1.74697	1.48633	1.22621	1.33464	1.34906	1.39185	1.40789	1.36894	1.38956
EVM0004293	3.72799	2.96745	3.95285	3.54943	6.65725	6.74913	7.6106	7.00566	5.84416	6.11074	4.85568	5.60353	2.72856	3.49568	2.74818	2.99081	3.23963	2.97747	3.61754	3.27821	4.07682	3.86398	3.82314	3.92132	10.0532	10.5498	10.1551	10.2527	6.90114	7.76517	6.62375	7.09669	3.96034	3.77997	4.96858	4.2363	4.67427	3.39831	3.26413	3.7789
EVM0004292	7.41099	7.60259	7.65264	7.55541	4.13846	3.09896	4.52633	3.92125	1.78699	2.25874	2.1553	2.06701	4.30117	4.32955	4.14076	4.25716	4.84131	6.19009	5.82823	5.61988	4.06199	5.38842	4.43324	4.62788	5.99798	4.76574	5.54222	5.43531	2.1393	1.44715	2.08649	1.89098	3.53506	3.4709	3.87429	3.62675	4.51872	5.20058	5.14669	4.95533
EVM0003017	27.787	23.8039	27.5911	26.394	11.5096	11.8185	10.734	11.354	5.6392	6.29781	6.59146	6.17616	10.2429	9.69024	8.421	9.45138	16.5336	15.9012	16.1778	16.2042	13.5902	13.5762	15.2968	14.1544	4.24253	3.92032	3.4667	3.87652	3.26718	3.80054	3.77151	3.61308	6.92928	6.22676	6.78579	6.64727	8.07126	6.8976	6.21667	7.06184
EVM0003014	6.91338	6.49227	9.13829	7.51465	3.81908	3.62708	4.22875	3.89164	2.93091	2.93403	3.50619	3.12371	3.1491	3.5257	3.42321	3.36601	4.77016	4.33267	3.89534	4.33273	4.58628	4.30103	4.17657	4.35463	2.07457	2.52709	2.96934	2.52367	3.90038	4.0341	4.03848	3.99099	3.68784	3.39442	3.31048	3.46425	4.86202	5.12889	4.49935	4.83008
EVM0051571	1.06735	1.25681	1.07553	1.13323	0.65544	0.56876	0.719734	0.647978	0.824175	1.22011	0.709244	0.917842	1.22699	0.911061	0.79684	0.978296	1.7922	1.37543	1.3116	1.49308	2.52039	1.65109	2.69728	2.28959	1.17443	0.920391	0.869526	0.988117	1.71778	1.08581	1.26121	1.35493	2.60104	1.72562	2.16402	2.16356	2.78258	2.34539	2.16954	2.4325
Salix_babylonica_newGene_3992	2.88889	3.86159	4.29293	3.68113	2.7923	3.54974	3.81206	3.3847	3.2626	1.82862	3.29356	2.79493	3.4119	3.35081	3.78614	3.51628	4.09187	2.57367	4.03341	3.56631	9.77223	9.06898	7.61046	8.81723	5.65352	5.61675	7.7496	6.33996	7.55116	5.54826	7.78188	6.96043	6.42638	6.72437	6.27838	6.47638	10.401	9.67884	5.83371	8.63784
EVM0007461	0.677922	0.354398	0.423407	0.485242	0.252035	0.358902	0.36717	0.326036	0.200318	0.181376	0.218948	0.200214	0.323567	0.421885	0.205009	0.31682	0.19515	0	0.28848	0.16121	0	0.024069	0.027134	0.0170677	0	0.03312	0	0.01104	0	0	0.024048	0.008016	0	0	0	0	0.050478	0	0	0.016826
Salix_babylonica_newGene_3998	18.7532	22.1002	20.3502	20.4012	14.9393	14.8038	16.582	15.4417	14.7092	15.5843	19.0968	16.4634	19.6011	22.6335	23.4493	21.8946	22.9755	22.6907	21.2734	22.3132	7.32089	8.52278	11.1025	8.98206	8.36763	9.45323	8.28942	8.70343	9.0161	6.11182	9.05927	8.0624	8.94796	6.06034	7.20496	7.40442	7.34369	9.13403	8.53634	8.33802
EVM0015457	8.58763	7.35519	8.36968	8.10417	6.82058	6.7482	7.54884	7.03921	7.13008	5.25153	6.43771	6.27311	6.86967	6.49708	7.16047	6.84241	5.70001	5.93425	6.0163	5.88352	7.38562	8.38446	7.47358	7.74789	5.46724	4.93097	4.41507	4.93776	4.29055	4.08205	4.04137	4.13799	2.08122	1.74761	1.97236	1.93373	4.74318	4.56422	4.61975	4.64238
EVM0015450	6.0766	6.93995	7.68566	6.90074	6.46526	7.23329	6.58456	6.76104	5.19724	5.03861	5.30035	5.17873	7.97659	8.44805	8.63308	8.35257	11.1462	10.1111	10.3025	10.5199	8.58758	6.67859	7.26755	7.51124	7.84084	7.38977	7.27342	7.50134	7.43332	6.34725	5.4535	6.41136	8.90676	7.71293	10.1676	8.9291	12.1424	10.9146	9.57287	10.8766
EVM0007466	9.2764	9.55381	9.05596	9.29539	10.5797	12.2319	10.5099	11.1072	6.59725	6.52605	6.79903	6.64078	5.42975	5.1438	4.08736	4.88697	7.36965	5.58387	5.99974	6.31775	10.3759	9.32051	9.61194	9.76945	10.648	8.93674	9.44926	9.678	5.62873	6.64469	6.92448	6.3993	5.28502	5.54203	4.97191	5.26632	6.84846	5.50844	5.95212	6.10301
EVM0004747	2.79187	2.36255	2.5331	2.56251	2.4125	1.99667	1.65776	2.02231	0.720475	1.41488	0.79415	0.976502	0.201476	0.647393	0.490342	0.446404	0.847816	0.716664	0.517805	0.694095	1.60091	1.14789	1.35523	1.36801	0.409754	0.298273	0.622222	0.443416	0.70421	0.88688	0.55125	0.714113	0.28304	0.114646	0.515231	0.304306	0.236872	0.26612	0.17399	0.225661
EVM0004746	2.58699	1.99656	2.40099	2.32818	1.15471	1.4577	1.67801	1.43014	1.98319	2.185	2.01083	2.05968	3.20724	3.70069	3.25499	3.38764	3.32589	2.09933	2.47403	2.63308	0.891792	0.817521	0.631436	0.78025	0.383891	0.598138	0.567551	0.516527	0.588714	0.64411	0.674399	0.635741	0.869959	0.729044	1.1473	0.915434	0.518336	0.73317	0.626712	0.626073
EVM0004745	2.44418	2.43966	2.46966	2.45117	5.34213	5.50472	5.85491	5.56725	12.1269	12.5898	12.4307	12.3825	3.70574	2.89621	3.46626	3.35607	3.24467	3.4015	2.44281	3.02966	6.78253	4.97919	6.70554	6.15576	11.3412	11.2027	10.9572	11.167	16.0012	12.6001	15.0786	14.56	4.49428	4.69385	4.29856	4.49556	6.15006	6.10636	6.66386	6.30676
EVM0004743	0.781838	0.573999	1.16104	0.83896	0.640765	0.68467	0.740642	0.688692	1.02247	0.695048	1.5929	1.10347	1.31018	1.90741	1.26812	1.49524	0.774586	1.42104	0.898595	1.03141	0.622994	0.704991	0.633567	0.653851	0.50146	0.674487	0.533205	0.569717	0.665153	0.743146	0.749947	0.719415	0.904694	0.644186	0.613873	0.720918	0.68629	0.94928	0.926488	0.854019
EVM0004742	13.2534	11.928	10.9104	12.0306	10.2559	10.5827	9.99971	10.2794	10.4182	9.12852	9.81832	9.78835	3.4865	3.50631	3.36297	3.45193	4.39475	3.82599	5.15168	4.45747	9.67666	10.1607	10.3879	10.0751	9.10468	9.35884	8.50578	8.98977	9.05311	10.1962	8.18727	9.14553	2.81695	2.82875	2.35523	2.66698	2.87156	3.60122	3.72904	3.4006
EVM0004740	22.8598	27.5035	23.7296	24.6976	79.7086	79.5176	75.3207	78.1823	70.8722	75.7739	71.0871	72.5777	13.1369	13.4213	12.1551	12.9044	13.6556	13.65	13.4538	13.5865	11.7644	10.9175	11.5412	11.4077	19.8984	21.1434	21.851	20.9643	20.7429	20.7655	21.2456	20.918	7.03248	6.99331	6.72012	6.9153	7.65031	8.1555	8.3429	8.04957
EVM0008676	3.45251	3.73847	4.54464	3.91187	4.2058	3.21366	2.88117	3.43355	2.69479	2.92827	2.40731	2.67679	7.89251	6.71235	7.44261	7.34916	4.59281	3.63554	2.66493	3.63109	2.72477	2.73179	2.68549	2.71402	3.47179	3.01163	3.57093	3.35145	2.5263	2.05433	1.43223	2.00429	3.24609	3.14594	4.32563	3.57255	2.92129	3.06904	2.44569	2.812
EVM0028165	26.2807	26.3343	28.0612	26.8921	23.2336	21.3861	21.6019	22.0739	13.9415	13.5283	14.4794	13.9831	3.64873	3.96421	4.07269	3.89521	6.05817	5.53583	5.08571	5.5599	18.2279	16.3187	15.9144	16.8203	7.88403	7.5364	8.86629	8.09557	10.067	9.82357	10.6516	10.1807	3.38857	2.932	3.85713	3.39257	4.9244	4.47328	5.21689	4.87152
EVM0028164	8.96229	9.00517	7.91732	8.62826	28.1828	23.9375	25.2099	25.7767	6.49776	7.0326	7.14684	6.8924	7.87882	7.50119	8.08763	7.82255	3.58378	5.49009	4.20041	4.42476	2.99681	3.26635	3.28699	3.18338	18.2922	14.6641	16.8736	16.61	2.74711	2.46409	3.40841	2.8732	7.73365	6.21907	6.85375	6.93549	4.01461	5.30822	3.90389	4.40891
EVM0028161	0.136272	0.130984	0.301629	0.189628	0.456307	0.303751	0.509439	0.423166	0.348174	0.470656	0.250283	0.356371	0.454988	0.463164	0.637975	0.518709	0.191129	0.472331	0.28207	0.315177	0.151158	0.205438	0.222477	0.193024	0.071083	0.236116	0.14744	0.151546	0.258863	0.266046	0.245939	0.256949	0.411194	0.456156	0.366669	0.41134	0.349664	0.343078	0.333926	0.342223
EVM0028160	0	0.223171	0.299644	0.174272	1.45147	0.471513	0.958827	0.960603	5.39058	5.75146	5.61414	5.58539	19.233	16.8164	14.1865	16.7453	18.1847	17.8903	14.9364	17.0038	3.31142	5.18505	2.44205	3.64617	7.60111	8.79663	6.04353	7.48042	10.5758	10.1577	11.407	10.7135	64.4713	48.4915	64.6199	59.1942	56.1451	46.5391	43.2953	48.6598
EVM0052215	3.1576	2.96908	3.75895	3.29521	2.2487	1.93264	2.60955	2.26363	2.55878	1.40856	1.26046	1.7426	0.930585	0.714928	0.895837	0.847117	1.08426	0.923817	0.93414	0.98074	3.66792	3.62307	3.42435	3.57178	1.90765	1.33113	2.17034	1.80304	1.47094	1.43214	1.0989	1.33399	0.909085	0.644748	1.49339	1.01574	1.80945	1.08034	1.11785	1.33588
EVM0052212	0.651125	1.7012	1.80785	1.38673	0.91002	1.49826	0.290006	0.899427	1.59745	1.79821	1.75149	1.71572	0.700891	1.33529	0.970615	1.00226	0.229564	0.352082	0.847519	0.476388	1.4107	1.69992	0.811288	1.3073	2.54818	3.33575	2.48757	2.7905	2.47657	3.14019	4.56425	3.39367	2.84512	2.20607	1.80079	2.28399	2.00299	1.94024	2.2028	2.04867
EVM0025397	3.67932	3.16016	3.51994	3.45314	2.63836	2.17124	2.44981	2.4198	0.77909	0.825314	0.842775	0.815726	0.809323	0.236108	0.777862	0.607764	0.506357	1.06596	0.48819	0.686836	3.50745	2.49963	3.69624	3.23444	2.89026	2.996	2.172	2.68609	2.52115	1.65736	2.72087	2.2998	0.55015	0.896616	1.56525	1.00401	1.33312	1.41446	1.70793	1.48517
EVM0016226	0.470931	0.370205	0.150509	0.330548	0.185268	0	0.090869	0.0920457	0	0.063571	0.079963	0.0478447	1.4435	2.09714	2.02685	1.85583	1.41543	1.70183	1.34368	1.48698	0.450413	0.3329	0.635312	0.472875	0.204687	0.266646	0.226441	0.232591	0	0	0.068416	0.0228053	4.95388	4.23628	4.28603	4.49206	4.44205	4.19515	3.86106	4.16608
EVM0016224	1.82226	1.71625	1.8944	1.81097	0.857961	0.902458	1.36983	1.04342	1.31096	1.18674	1.49668	1.33146	0.971609	1.05168	1.02804	1.01711	1.34466	1.59353	1.24828	1.39549	0.640785	1.01395	0.671891	0.775543	0.650257	0.711416	0.61707	0.659581	0.749696	0.8689	0.811837	0.810144	0.36505	0.786604	0.707359	0.619671	0.93843	1.15791	0.917953	1.00476
EVM0016223	8.03397	6.66846	7.90504	7.53583	7.29902	8.61285	7.74489	7.88559	12.2892	12.5934	13.2336	12.7054	15.6316	16.1884	13.4736	15.0979	11.876	12.6181	12.748	12.414	3.47134	3.6246	3.1837	3.42655	7.40535	7.54328	9.33268	8.09377	4.26039	4.04309	4.37042	4.22463	6.56656	6.47168	8.73284	7.25703	6.83345	6.5784	9.11667	7.5095
EVM0016222	0.749742	0.499757	0.472219	0.573906	0.748182	1.24223	0.795841	0.92875	0	0	0	0	0.439587	0.4447	0.149053	0.344447	0.683281	0.448136	0.487032	0.539483	2.31002	1.87321	2.33254	2.17192	1.13989	1.3172	1.51863	1.32524	1.13399	1.00423	0.843343	0.993852	1.2518	0.642011	0.928878	0.940897	2.30583	1.95473	3.15118	2.47058
Salix_babylonica_newGene_2020	0.362875	0.897357	0	0.420077	0.231361	0.607073	0.459981	0.432805	0.358429	0.353367	0.690705	0.4675	0.133629	0.69646	0.224662	0.351584	0.536017	0.532742	0.273791	0.447517	2.07731	1.46485	1.81547	1.78588	1.66639	1.55236	1.51916	1.57931	1.65661	1.22723	1.4091	1.43098	1.98306	1.24772	1.52072	1.58384	0.645854	1.25872	0.875583	0.926719
Salix_babylonica_newGene_2021	1.64401	2.45121	1.38933	1.82818	2.47086	2.08737	2.29252	2.28358	2.33971	1.73444	1.8275	1.96722	1.57739	2.96274	1.65813	2.06609	2.41055	2.27942	2.97789	2.55596	0.531679	0.679277	0.488605	0.56652	1.06445	0.881705	0.693294	0.879817	0.47019	0.290748	0.920598	0.560512	0.733544	1.24425	0.814315	0.930704	0.954237	0.619186	0.70861	0.760678
Salix_babylonica_newGene_2026	5.49202	5.25167	4.6536	5.13243	2.33419	2.29464	2.74983	2.45955	2.54684	1.81427	2.35767	2.23959	2.38006	1.65579	1.33778	1.79121	2.26779	3.27167	2.2155	2.58499	3.72049	2.01444	2.87886	2.87126	2.54679	1.97165	2.54911	2.35585	2.20079	1.93125	1.82976	1.98727	1.71103	2.04243	1.66698	1.80681	1.55067	2.25499	2.12025	1.9753
EVM0009122	4.1417	3.51836	3.13045	3.59683	9.06525	8.31995	7.73693	8.37404	4.64483	3.89304	4.50321	4.34703	3.64454	3.20039	2.83422	3.22638	1.73698	2.58789	1.90822	2.0777	2.11694	2.32977	2.88847	2.44506	7.65084	6.56765	7.5526	7.25703	3.36591	2.94954	3.89535	3.4036	2.7863	2.94232	2.38326	2.70396	1.77296	1.76638	1.9884	1.84258
EVM0027380	1.15525	1.49741	1.29742	1.31669	1.55717	1.31746	1.13122	1.33528	2.13871	2.3358	2.10984	2.19478	1.47907	0.812501	0.841184	1.04425	0.893612	1.0407	0.94437	0.959562	1.34892	1.04129	1.32008	1.23676	0.968916	1.02273	1.40338	1.13167	1.83149	2.14148	2.1277	2.03356	1.0185	1.21022	1.22186	1.15019	0.899253	1.17975	0.728277	0.935759
EVM0027383	13.1209	14.47	11.5525	13.0478	8.89663	7.71664	7.44829	8.02052	12.938	13.2349	12.645	12.9393	11.664	12.9867	10.5762	11.7423	16.9076	17.4767	16.9633	17.1158	12.999	13.0408	12.902	12.9806	9.38479	10.9538	9.25975	9.8661	16.6995	16.8767	16.679	16.7517	12.411	14.7579	14.5286	13.8992	13.4881	14.3454	15.3628	14.3988
EVM0019901	2.49823	2.12024	2.57678	2.39842	1.80977	1.89776	1.8393	1.84894	2.51109	1.9162	2.15712	2.1948	1.75517	1.47505	1.62838	1.61953	2.3277	2.58618	1.92474	2.27954	0	0	0.048396	0.016132	0	0	0	0	0.127199	0	0	0.0423997	0	0	0	0	0	0	0.213458	0.0711527
EVM0019900	8.10356	7.17018	6.75452	7.34275	6.54426	6.84291	7.74018	7.04245	2.74203	3.04192	1.98452	2.58949	3.29726	4.18437	3.00124	3.49429	5.14282	5.21003	5.71525	5.35603	8.84701	9.12204	7.48108	8.48337	10.8283	10.177	8.43421	9.81317	9.92403	9.58474	8.14308	9.21728	9.23796	9.54828	7.82438	8.87021	10.552	10.5742	12.0705	11.0656
EVM0019904	0.139067	0.100705	0.147622	0.129131	0.318087	0.171483	0.137581	0.20905	0.083249	0.064124	0.097566	0.0816463	0.130405	0.250902	0.177801	0.186369	0.188705	0.189328	0.173925	0.183986	2.09739	2.46123	1.8714	2.14334	4.0201	3.34775	3.39742	3.58842	2.89776	3.07124	2.76076	2.90992	3.92858	3.58955	3.98401	3.83405	3.46491	3.48727	3.74046	3.56421
Salix_babylonica_newGene_3379	1.70095	1.55482	1.94759	1.73445	0.911977	0.826301	0.91466	0.884313	0.439821	0.439103	0.700629	0.526518	0.233741	0.209849	0.319458	0.254349	0.58163	0.808115	0.712051	0.700599	2.22608	2.51384	1.76899	2.16964	0.987747	0.932332	1.42834	1.11614	1.20358	1.33241	0.885023	1.14034	0.486993	0.667745	0.503384	0.552707	0.626406	0.726718	0.36805	0.573725
EVM0012109	51.8645	54.1952	47.1476	51.0691	84.4742	81.4665	84.9835	83.6414	86.5596	86.4719	80.0501	84.3605	52.5382	55.7955	53.0036	53.7791	57.8746	62.1132	58.2637	59.4172	51.0377	50.1541	50.0013	50.3977	85.2747	76.6019	84.243	82.0398	92.7106	96.6929	99.8547	96.4194	68.3241	62.2783	59.2067	63.2697	61.0465	53.4736	54.2364	56.2522
EVM0012103	2.73852	2.69233	2.44018	2.62368	1.27629	2.10774	2.30902	1.89768	1.11134	2.37875	2.28178	1.92396	1.42435	1.46226	1.44594	1.44418	1.59785	1.93363	1.65713	1.72953	1.43255	0.817669	1.30493	1.18505	1.84704	1.77146	1.34498	1.65449	1.08088	0.995391	0.889437	0.988569	0.839953	0.660597	0.808268	0.769606	0.929361	0.972511	0.90702	0.936297
EVM0012101	2.26071	1.22661	1.65811	1.71514	2.83666	2.91397	2.30675	2.68579	3.5218	3.26544	3.40603	3.39776	3.67282	3.09901	2.99159	3.25447	2.89308	3.98799	3.8024	3.56115	2.45067	2.52515	2.90397	2.6266	1.97952	2.00301	1.63683	1.87312	2.76382	2.834	2.76454	2.78745	2.595	2.29961	2.87367	2.58943	2.9364	2.98335	3.37998	3.09991
EVM0012105	1.84534	1.99645	1.58818	1.80999	1.38538	1.60985	1.44798	1.48107	0.713462	0.737667	1.12545	0.85886	1.17712	1.37786	1.21598	1.25699	2.60401	2.06447	2.64501	2.43783	0	0	0	0	0.541741	0.284581	0.192596	0.339639	0.630162	0.450814	0.499129	0.526702	0.374323	0.159423	0.107356	0.213701	0.293718	0.209548	0.202244	0.23517
EVM0015856	2.83196	2.44073	2.03386	2.43552	1.92677	1.94028	1.67824	1.84843	1.63061	1.53035	1.79847	1.65314	0.993242	1.6045	1.16179	1.25317	1.68849	1.95582	1.31435	1.65289	2.72056	2.74444	3.10803	2.85768	2.05827	1.61046	1.78223	1.81699	1.56356	2.00191	1.57897	1.71481	0.633131	0.605062	0.629388	0.622527	1.07424	0.888455	0.727838	0.896845
EVM0003909	8.88683	7.74879	7.9009	8.17884	5.6203	3.97213	4.92126	4.8379	5.81565	3.34991	4.89878	4.68811	2.62546	2.12839	3.79897	2.85094	4.04907	4.91009	3.8491	4.26942	11.5285	11.528	10.5926	11.2163	6.64793	5.83128	5.4268	5.96867	5.86311	5.25905	5.79911	5.64042	2.62515	3.33995	1.99592	2.65367	2.52082	2.11493	2.27469	2.30348
EVM0003904	14.7863	14.6721	16.075	15.1778	8.0993	7.77921	8.22105	8.03319	7.39098	7.86696	7.24474	7.5009	11.9636	11.2744	12.7332	11.9904	14.6407	11.8787	13.0969	13.2054	5.3226	6.24486	5.68632	5.75126	3.97632	3.26775	4.36656	3.87021	3.57796	2.98161	3.11425	3.22461	5.75238	5.898	4.77652	5.47563	7.02343	7.45204	6.53704	7.00417
EVM0050557	1.20035	1.12252	1.10806	1.14364	1.02262	1.16908	1.68523	1.29231	1.75856	1.05483	1.94571	1.58637	1.40859	1.34781	0.98807	1.24816	0.901116	0.821996	0.88217	0.868427	0.373074	0.683245	0.577045	0.544455	0.844398	0.754211	0.692432	0.76368	0.538979	0.676475	0.756972	0.657475	0.538575	0.536314	0.779871	0.618253	0.387856	0.423565	0.36169	0.391037
EVM0003906	1.49333	1.3756	1.39591	1.42161	0.85107	0.368524	0.620757	0.61345	0.550009	0.639815	0.922507	0.70411	0.545536	1.0406	0.835775	0.807305	1.10212	0.9677	1.89265	1.32082	1.22959	1.90681	1.50459	1.547	0.563123	0.932707	0.941795	0.812542	0.980009	1.56776	1.18085	1.24287	1.16266	1.47007	1.516	1.38291	1.40336	1.69348	2.61227	1.90304
EVM0003903	1.00524	2.2665	1.43791	1.56988	1.6804	1.49749	1.91306	1.69698	1.38953	2.81605	1.84649	2.01736	1.8949	1.15959	1.12784	1.39411	1.86073	2.07703	2.37931	2.10569	0.508208	0.791827	1.2822	0.860745	0.811735	0.908902	1.74	1.15355	2.28768	1.77281	1.87063	1.97704	2.40509	1.50193	2.43527	2.1141	2.05854	1.60434	1.88056	1.84781
EVM0007218	23.2989	18.668	20.8605	20.9424	13.3758	15.3616	17.5716	15.4364	7.25242	5.35437	6.05841	6.22173	5.24522	4.56168	7.19987	5.66892	13.556	10.6268	10.9502	11.711	23.8774	25.3495	18.6279	22.6183	15.4753	13.2356	12.1186	13.6098	10.7348	11.0654	8.37883	10.0597	2.70491	2.46508	3.02665	2.73221	7.25125	5.76555	4.56079	5.85919
EVM0007214	22.3043	28.4731	23.1251	24.6342	9.43745	6.99409	9.94359	8.79171	12.2607	10.1822	10.0525	10.8318	9.18944	8.98255	8.67021	8.9474	10.2205	10.2547	10.204	10.2264	19.563	18.4411	17.9609	18.655	12.3972	13.0868	11.0704	12.1848	12.0835	12.6421	9.9067	11.5441	8.62147	8.70023	7.91724	8.41298	10.2984	9.23399	11.7973	10.4432
EVM0007216	10.1854	8.8176	9.54448	9.51584	14.6025	14.4083	16.0114	15.0074	23.6483	20.5534	24.3738	22.8585	28.1174	29.3137	29.8201	29.0837	22.2	23.6919	21.8851	22.5923	11.2132	10.9354	10.3934	10.8473	12.1001	11.6991	11.0375	11.6122	12.765	13.2561	12.9597	12.9936	16.7492	15.7726	16.8174	16.4464	19.0987	17.0736	16.9648	17.7124
EVM0007211	2.329	2.19473	2.55406	2.35926	1.17447	1.24807	0.911935	1.11149	0.208396	0.720926	0.557158	0.495493	0.070893	0	0	0.023631	0	0.053581	0.318863	0.124148	0.279983	0.666649	0.241371	0.396001	0.087921	0.375184	0.131834	0.198313	0.156684	0.170744	0.076603	0.134677	0	0	0.095738	0.0319127	0.115616	0	0.023682	0.0464327
EVM0007213	1.4597	2.38697	1.89315	1.91327	0.861871	1.2377	1.11584	1.0718	2.26522	2.65764	2.20949	2.37745	2.41396	2.54908	2.65978	2.54094	1.79847	1.9089	2.28185	1.99641	1.32709	1.71085	1.7479	1.59528	1.73607	1.5763	1.56476	1.62571	0.681635	0.809425	0.986601	0.825887	0.768368	0.738069	1.17108	0.892504	0.883389	0.967915	0.935022	0.928775
EVM0016481	5.59499	4.9982	3.52948	4.70756	3.8743	4.19541	3.78793	3.95255	3.82518	4.19994	3.65492	3.89335	3.31487	3.99487	3.64661	3.65212	3.49268	3.39282	2.885	3.25684	8.3592	8.37168	7.66592	8.13227	6.98082	7.29172	8.47025	7.58093	8.27677	9.53891	7.73844	8.51804	6.00025	5.14129	6.47327	5.8716	6.98781	7.28214	5.99271	6.75422
EVM0016487	3.44584	4.236	4.50837	4.0634	4.75898	4.96535	6.3381	5.35414	3.27774	3.44945	3.15191	3.29303	1.27788	0.705125	1.3905	1.1245	1.70679	1.49707	1.37786	1.52724	0.40468	0.754723	0.530793	0.563399	0.850594	0.336843	0.258821	0.482086	0.155122	0.269349	0	0.14149	0.239057	0.074981	0.14263	0.152223	0	0.272739	0.145934	0.139558
EVM0016486	8.35742	8.28788	8.43551	8.36027	10.5354	10.339	12.3158	11.0634	12.1575	11.9551	12.0973	12.07	5.2847	4.48151	4.1519	4.63937	5.96134	6.59628	5.34196	5.96652	9.52753	9.64796	8.92364	9.36638	11.5268	12.3039	11.7044	11.845	15.5478	15.4678	16.1635	15.7264	5.99185	7.26644	5.60153	6.28661	6.38377	6.07241	5.83694	6.09771
EVM0016488	3.34958	3.62667	3.54828	3.50818	3.07466	2.98102	2.98267	3.01279	3.04548	2.99953	3.38492	3.14331	2.61312	2.54585	1.83279	2.33058	3.99587	3.39549	3.53791	3.64309	8.57575	8.2729	8.49669	8.44845	7.37606	7.70205	6.18268	7.08693	6.88816	8.84962	7.24064	7.65947	9.12486	9.20999	9.45444	9.26309	8.11368	7.48393	10.9434	8.84701
EVM0057067	0.455824	0.199712	0.197111	0.284216	0.060614	0.118161	0.318858	0.165878	0	0	0.057588	0.019196	0	0	0.04528	0.0150933	0	0	0.04929	0.01643	0.427626	0.392054	0.648574	0.489418	1.04912	1.21794	1.3173	1.19479	0.418775	0.75943	0.852229	0.676811	0.250566	0.252315	0.189185	0.230689	0.211754	0.301533	0.177236	0.230174
EVM0057065	0.820139	0.530105	0.702504	0.684249	0.488546	0.296951	0.533241	0.439579	0.735727	0.325496	0.442024	0.501082	0.573352	0.385379	0.301529	0.420087	0.555266	0.491918	0.62128	0.556155	0.352135	0.446298	0.503484	0.433972	0.204159	0.221532	0.166805	0.197499	0.36645	0.357043	0.47704	0.400178	0.326213	0.140391	0.095991	0.187532	0.295093	0.144734	0.222074	0.220634
EVM0057062	2.10778	2.49352	1.86984	2.15705	1.19846	1.3476	1.25825	1.2681	0.808328	0.989773	0.677772	0.825291	1.00349	0.946806	1.35081	1.10037	0.790631	0.81361	0.858195	0.820812	0.442711	0.318	0.306763	0.355825	0.371635	0.380254	0.17962	0.310503	0.204322	0.142856	0.357652	0.234943	0.242795	0.440963	0.182801	0.288853	0	0.372775	0.215075	0.19595
EVM0057061	1.77673	1.86956	2.00678	1.88436	1.50359	0.891644	1.03173	1.14232	1.16429	0.974742	1.77143	1.30349	0.84965	1.72222	1.74622	1.43936	2.39395	2.21221	1.55986	2.05534	1.65393	1.82008	1.24202	1.57201	3.23752	3.18879	2.73132	3.05254	3.24531	2.83831	1.35504	2.47955	3.11577	1.40921	1.04125	1.85541	4.31048	1.41653	1.52254	2.41652
EVM0017572	1.20153	1.04263	0.65768	0.967282	3.41085	3.33105	3.34458	3.36216	1.90067	2.10092	2.34203	2.11454	2.15554	2.47908	2.76646	2.46703	3.57747	3.23473	2.94173	3.25131	0.996234	1.46759	1.21065	1.22483	3.11727	2.09268	2.9898	2.73325	1.28183	1.37634	2.29679	1.65165	2.50344	2.25662	2.52475	2.42827	4.19269	3.61935	4.26416	4.0254
EVM0028834	9.38808	8.894	8.17538	8.81915	10.3724	11.1309	11.9312	11.1448	5.64035	6.33538	6.63139	6.20237	6.65862	5.53344	5.88842	6.02682	6.01691	5.8397	5.58877	5.81513	5.37061	7.58705	7.3424	6.76669	12.8612	12.9145	11.4822	12.4193	6.07569	6.01471	6.49153	6.19398	7.13751	8.65881	7.03506	7.61046	5.51463	6.28703	6.87799	6.22655
EVM0028839	2.30962	2.00186	1.65074	1.98741	2.16245	2.22314	2.5375	2.3077	5.46222	6.40332	5.04595	5.63716	6.74845	6.6057	6.59776	6.65064	9.74447	9.55464	10.5488	9.94929	8.76144	8.09102	7.98241	8.27829	2.15168	1.9242	2.16319	2.07969	5.03242	5.6596	6.26204	5.65135	7.1046	6.74342	5.59152	6.47985	9.88178	10.084	9.10633	9.69072
EVM0013745	3.56592	4.30635	4.19355	4.02194	1.54538	2.57241	2.54237	2.22005	2.26582	1.7867	1.6364	1.89631	1.33143	1.6267	0.886508	1.28155	2.39555	2.38637	2.53169	2.43787	1.81654	2.78355	2.31419	2.30476	4.02726	4.72366	3.8376	4.19617	7.3728	7.58871	5.01772	6.65974	2.10497	3.15183	3.33627	2.86436	6.49488	8.24704	8.10165	7.61452
EVM0013059	3.83029	4.0469	4.78137	4.21952	2.96812	3.36226	2.6532	2.99453	1.50021	2.11446	1.76486	1.79318	1.03227	0.995412	0.954163	0.993948	2.1817	2.28997	1.31705	1.92957	4.80194	5.81682	4.90044	5.17307	2.72525	2.3242	2.44206	2.49717	2.07553	2.42957	2.47294	2.32601	1.26608	0.929371	1.14964	1.11503	2.05397	1.97514	2.00062	2.00991
Salix_babylonica_newGene_2973	0.252782	0.290142	0.169073	0.237332	1.05373	1.62643	1.74359	1.47458	1.45378	1.71348	2.51305	1.89344	6.64794	7.9945	7.70007	7.4475	3.84303	2.83311	3.5226	3.39958	0.100114	0.056424	0.272792	0.14311	1.90142	1.88804	2.11019	1.96655	1.35695	1.5736	1.93024	1.62027	8.61274	10.1998	10.9437	9.91875	7.29872	6.46171	7.1054	6.95528
EVM0017041	4.43649	6.05495	4.74159	5.07768	2.2616	2.64988	2.55251	2.48799	1.6752	1.34224	1.13574	1.38439	0.684348	0.592197	1.36404	0.880193	2.6141	1.8085	2.24605	2.22288	5.20258	5.97349	5.1666	5.44756	1.70872	1.62885	1.79348	1.71035	1.19751	0.390364	1.44738	1.01175	0.723716	1.17784	1.05301	0.984857	1.67891	1.50713	2.00988	1.73197
EVM0048255	1.11108	0.919499	0.66465	0.89841	0.391412	0.530382	0.445216	0.45567	0.389815	0.346766	0.261318	0.332633	16.8767	16.7645	17.2387	16.9599	12.1569	12.5394	13.2376	12.6447	1.33035	1.3232	1.7768	1.47679	1.74457	1.30845	1.4252	1.49274	1.46068	0.989552	1.34736	1.26586	26.6541	24.1436	24.4513	25.083	21.3677	18.7455	20.3719	20.1617
Salix_babylonica_newGene_8300	33.4534	48.6606	35.1644	39.0928	38.1741	34.9507	28.1746	33.7665	61.3104	68.6842	53.2785	61.091	64.145	64.8061	67.1738	65.3749	92.3014	94.2548	102.918	96.4916	83.4092	118.818	125.89	109.373	106.232	104.988	107.969	106.396	214.254	220.597	241.515	225.455	223.598	219.773	283.113	242.161	241.089	204.235	314.535	253.286
Salix_babylonica_newGene_8306	0.574534	1.5944	0.596679	0.921872	0.351053	0.598864	0.427607	0.459175	0.202487	0.240623	0.164947	0.202686	0.2127	0.637831	0.405787	0.418773	0.614393	0.494022	0.561662	0.556692	1.41498	1.92817	1.89045	1.74453	1.63545	1.05312	1.1938	1.29412	0.78876	1.18017	1.01745	0.99546	1.67256	1.43806	1.44329	1.51797	2.28988	0.969204	2.21025	1.82311
EVM0026470	2.49834	2.22595	2.17236	2.29888	1.14875	1.20093	1.99245	1.44738	1.14473	0.673771	1.74721	1.18857	1.03455	1.03292	0.624382	0.897286	1.25995	1.43741	0.679308	1.12556	1.5853	1.81455	2.26511	1.88832	3.57195	2.56702	4.20907	3.44934	3.07478	3.81216	5.15472	4.01389	1.59858	2.05847	1.8212	1.82608	2.17477	2.21827	1.98584	2.12629
EVM0017689	0.040795	0.021957	0.1424	0.068384	0.833019	0.85491	1.84475	1.17756	0.178295	0.496697	0.825889	0.500294	0.2617	0.142082	0.192467	0.19875	0.04333	0.103138	0	0.0488227	0.068506	0	0.042808	0.0371047	0.235705	0.671528	0.192467	0.366567	0.770037	0.713474	0.705678	0.72973	0.22148	0.280178	0.217905	0.239854	0.089993	0.022468	0.070745	0.0610687
EVM0026479	3.58247	4.92774	3.29327	3.93449	5.64349	4.20658	5.2663	5.03879	2.01086	1.81095	1.4959	1.77257	2.14088	1.79676	1.91619	1.95128	3.0906	2.88338	4.15533	3.37644	2.07822	2.42301	3.32617	2.60914	14.9179	16.6675	14.1027	15.2294	7.12427	8.01461	8.86611	8.00166	10.5301	7.99704	10.2729	9.60003	14.2927	9.29968	13.6082	12.4002
EVM0041009	3.52154	2.95024	2.39166	2.95448	3.35252	2.47533	2.90834	2.91206	1.03346	2.12132	1.19294	1.44924	0.726276	0.594415	0.236006	0.518899	0.691148	0.207671	0.750462	0.54976	5.41994	4.30973	3.75675	4.49547	3.59414	1.62826	3.20606	2.80949	3.12474	2.62917	2.78297	2.84563	1.36005	1.8876	1.39793	1.54853	1.44088	1.79667	1.65677	1.63144
EVM0043011	9.03728	8.23394	8.28779	8.51967	6.46907	6.23984	7.5287	6.74587	5.83826	5.3538	6.15141	5.78116	3.78546	3.56241	3.33236	3.56008	4.37719	3.90174	3.32047	3.86647	7.57772	7.17173	6.91535	7.2216	4.55889	5.49723	5.56537	5.20716	4.50719	5.38538	5.05056	4.98104	3.19038	3.68733	3.91818	3.59863	3.42168	5.93761	4.86669	4.74199
EVM0010214	0.447102	0.413908	0.149272	0.336761	4.40893	4.82979	6.72036	5.3197	1.11111	1.58705	0.9807	1.22629	1.35532	1.04069	0.767231	1.05441	0.441303	0.355692	0.525103	0.440699	0.431584	0.218402	0.136927	0.262304	11.3867	11.3869	9.91039	10.8946	0.961791	1.21306	1.85497	1.34327	2.80578	2.2695	4.26132	3.1122	2.1828	2.39942	2.64554	2.40926
EVM0018750	2.20728	2.04431	1.38579	1.87913	2.11281	2.15616	2.21198	2.16032	0.443069	0.320891	0.620953	0.461638	0.328031	0.232044	0.448168	0.336081	0.947521	0.995102	0.355684	0.766102	3.40622	3.38565	2.96172	3.2512	1.06151	1.49573	1.29216	1.28313	0.279646	0.333989	0.11224	0.241958	0.737458	0.242116	0.620767	0.533447	0.91175	0.886012	1.27877	1.02551
EVM0018755	7.94442	7.51984	6.891	7.45175	5.77508	5.10137	5.20886	5.36177	10.8495	10.8345	12.1137	11.2659	15.8198	16.4833	14.9974	15.7668	10.3946	10.7123	9.49206	10.1997	8.18304	8.04425	8.29743	8.17491	7.46523	7.43091	7.25356	7.38323	9.68963	9.53052	9.18277	9.46764	13.1755	15.1064	14.8564	14.3794	16.5362	16.0061	16.9509	16.4977
EVM0018757	0.575575	0.923205	0.587541	0.69544	0.27808	0.827276	0.610861	0.572072	0.732199	1.04628	0.799051	0.859178	1.45229	0.931174	1.74179	1.37509	1.39281	1.80585	1.77727	1.65864	1.2722	0.972567	0.941866	1.06221	0.939472	0.218281	0.60131	0.586354	0.240714	0.350723	0.698421	0.429953	2.77342	1.46897	2.46439	2.23559	2.49225	2.77378	2.90931	2.72511
EVM0018759	8.46286	7.96028	8.33419	8.25244	7.66529	8.29616	7.26991	7.74379	12.0608	13.1401	11.7757	12.3255	22.0195	22.1058	23.6424	22.5892	24.4695	20.5519	22.3317	22.451	10.2981	10.5278	10.7532	10.5264	8.76395	9.06413	8.44753	8.75854	11.6325	10.8676	11.0501	11.1834	15.4035	15.6172	16.1487	15.7231	19.9598	20.4676	21.0478	20.4917
EVM0014881	10.1857	10.7198	12.7385	11.2147	19.3135	19.0073	20.0617	19.4608	6.74439	7.7854	6.45359	6.99446	5.56931	5.799	6.04717	5.80516	5.33818	6.56883	5.68069	5.86256	12.0573	10.5733	10.0329	10.8878	15.2083	14.8357	17.7491	15.9311	7.04467	7.48807	5.79497	6.7759	5.70035	5.89343	6.82538	6.13972	9.73231	9.1295	8.9493	9.27037
EVM0010508	2.65214	3.72321	3.39793	3.25776	1.73952	2.02896	2.05604	1.94151	2.38792	2.23464	2.75732	2.45996	2.89719	3.35449	2.60326	2.95165	4.44667	4.01045	4.75417	4.40376	2.58186	1.48921	2.25427	2.10845	1.48084	0.930765	1.22054	1.21071	1.29216	1.41787	1.38129	1.36377	1.74791	1.53414	1.86416	1.71541	1.64858	1.9909	1.16089	1.60012
EVM0020738	8.61721	11.2105	8.31381	9.38051	6.49806	6.6305	8.86781	7.33212	9.15783	12.427	11.166	10.9169	16.0444	14.8469	14.1796	15.0236	17.3513	16.0521	18.1178	17.1737	9.09746	13.1103	11.0661	11.0913	9.24751	6.91943	6.25237	7.4731	9.88298	11.9615	11.4297	11.0914	14.2803	15.5766	13.6201	14.4923	16.6834	13.9661	14.8603	15.1699
EVM0020739	19.0248	20.1843	18.0057	19.0716	12.6191	13.0211	11.5157	12.3853	14.8972	16.336	14.7123	15.3152	20.3175	23.1924	20.0652	21.1917	23.8445	26.0886	27.9298	25.9543	22.5454	20.1571	25.1197	22.6074	16.3729	13.4516	15.5817	15.1354	20.7975	23.4875	20.3495	21.5448	25.4389	21.377	25.4375	24.0844	26.6885	28.6607	28.7797	28.043
EVM0020731	2.32202	1.54489	1.51498	1.79397	2.71772	2.97542	2.34368	2.67894	1.43372	2.23709	1.24115	1.63732	0.860252	0.798353	0.435873	0.698159	1.40419	0.712372	1.11812	1.07823	0.961983	0.9921	1.3961	1.11673	2.35932	3.51218	2.72564	2.86571	3.02412	3.39812	1.80468	2.7423	0.96554	0.98054	1.06552	1.00387	1.07763	1.08998	0.536109	0.901239
EVM0020736	0.840972	0.766058	1.04951	0.885513	0.732417	0.875023	0.860385	0.822608	1.74724	1.20229	1.62313	1.52422	1.57055	1.3901	2.03265	1.66444	2.05304	2.21442	2.22114	2.16286	0.189749	0.342726	0.286536	0.273004	0.265639	0.05395	0.282003	0.200531	0.222993	0.121146	0.143541	0.16256	0.275937	0.040846	0.319656	0.212146	0.393065	0.116669	0.177259	0.228998
EVM0045187	0.373573	0.208703	0.249339	0.277205	0.226261	0.073899	0.444002	0.248054	0.566355	0.386684	0.668842	0.540627	2.53559	3.09204	2.62861	2.75208	1.33536	1.41559	2.66113	1.80402	4.34466	4.75153	6.21144	5.10254	1.20179	2.92517	1.84587	1.99094	1.82717	1.83672	1.36537	1.67642	19.9863	14.4923	15.9342	16.8043	15.6434	9.25086	10.5407	11.8116
EVM0022383	5.60517	5.04204	5.78554	5.47758	2.67728	2.48524	2.65197	2.60483	2.08458	1.44065	1.59011	1.70511	0.494621	0.817986	0.629308	0.647305	2.01924	1.67707	1.48408	1.7268	4.73337	4.16247	3.63107	4.17564	2.25635	2.48687	2.38003	2.37442	1.95271	2.01454	2.32215	2.09647	0.848824	1.2471	1.32378	1.1399	1.3989	1.99034	1.42209	1.60378
EVM0022381	0.87929	0.20529	0.792295	0.625625	1.84889	0.932159	1.50786	1.42964	1.74076	2.28432	2.00365	2.00958	1.73297	1.71587	2.33926	1.92936	0.93637	0.908526	1.07822	0.974374	0.486774	0.904599	0.683081	0.691485	0.523043	0.91768	1.06702	0.835914	1.23303	1.33781	1.92504	1.49862	0.9462	1.06763	0.78151	0.93178	1.07523	0.475579	0.877972	0.809593
EVM0037522	0	0	0	0	0	0	0	0	0	0	0	0	0	0	0	0	0	0	0	0	2.0443	1.90171	1.68002	1.87534	1.37344	1.13454	1.58163	1.3632	1.55123	1.52196	1.38329	1.48549	1.2207	1.12654	1.16461	1.17062	1.50942	2.50456	1.44935	1.82111
EVM0050304	8.77619	8.28131	9.72658	8.92802	16.5986	17.3017	15.8935	16.5979	11.0524	10.2099	11.5327	10.9317	14.5551	12.0373	15.1159	13.9028	9.27277	7.91708	8.97062	8.72016	4.88656	5.8009	6.49272	5.72673	13.269	12.4584	13.6678	13.1317	6.51108	5.20502	5.54239	5.75283	10.9182	9.56831	9.52072	10.0024	6.77383	6.7997	6.45193	6.67515
EVM0050305	2.44265	3.32845	2.22469	2.66526	3.13889	2.98146	2.78638	2.96891	2.05168	2.95082	1.75904	2.25385	1.63337	0.980177	1.58257	1.3987	1.37956	1.22738	1.3444	1.31711	1.81272	1.57952	1.48559	1.62595	2.23745	2.10756	2.02336	2.12279	1.78333	1.88112	1.87646	1.84697	1.57573	0.858673	1.59282	1.34241	1.42517	0.934042	0.864619	1.07461
EVM0050301	3.49056	3.20343	3.73237	3.47545	3.58941	4.17725	3.87509	3.88058	3.14514	2.00595	2.96707	2.70606	3.92622	5.26317	5.61292	4.9341	5.17599	8.51394	5.94133	6.54375	3.42916	1.96191	2.11133	2.5008	1.28931	3.35333	2.69578	2.44614	3.00306	3.75391	3.59408	3.45035	4.9497	3.73632	4.66568	4.45057	5.47297	4.8984	4.96759	5.11299
EVM0035461	6.66491	5.27407	6.00039	5.97979	15.5587	17.4202	15.8817	16.2869	2.29939	2.25799	2.7345	2.43063	9.04477	10.1366	9.73523	9.63887	1.96172	2.4392	2.25282	2.21791	6.98818	7.65221	6.44118	7.02719	15.4402	13.4698	14.9357	14.6152	3.6292	3.78588	3.20763	3.5409	10.2158	10.156	10.5908	10.3209	3.8657	5.89523	5.4399	5.06694
EVM0050309	0.63945	0.44775	0.761694	0.616298	0.941264	0.714996	0.657501	0.771254	0.324081	0.34018	0.408951	0.357737	0.175544	0.266139	0.307527	0.249737	0.182104	0.290288	0.461057	0.31115	0.735492	0.815427	0.91543	0.822116	0.950835	1.23447	0.851485	1.01226	0.544317	0.537558	0.461081	0.514319	0.628757	0.460943	0.183236	0.424312	0.662332	0.764563	0.511809	0.646235
EVM0057129	6.39157	5.4409	6.42947	6.08731	13.1788	13.139	11.2847	12.5342	5.3467	4.81254	6.33579	5.49834	3.0993	3.59267	3.17054	3.2875	3.6419	4.61062	4.18724	4.14658	5.82868	5.70284	5.10052	5.54402	11.4633	11.357	11.1917	11.3373	6.84842	5.91752	6.02767	6.26454	3.67246	4.66223	3.30561	3.8801	3.34133	3.53439	4.22839	3.70137
EVM0019482	6.48461	6.8337	7.13038	6.81623	6.19746	7.44627	7.15639	6.93337	4.45637	5.19153	5.11989	4.9226	3.15902	2.24797	2.31676	2.57458	2.89225	3.36589	3.8008	3.35298	5.53897	6.38664	5.8736	5.93307	10.2831	10.9713	10.1765	10.477	9.15511	9.80796	7.64069	8.86792	4.03899	3.75759	4.03255	3.94304	7.74721	8.90571	8.5441	8.39901
EVM0026881	2.51878	2.58301	2.69027	2.59735	2.42644	2.02676	2.1504	2.2012	3.39344	3.23855	3.08124	3.23774	2.48768	2.32877	3.00644	2.60763	3.22535	3.33838	2.2206	2.92811	6.42252	6.49117	6.78868	6.56745	5.27606	5.76778	5.95516	5.66633	6.26422	6.53796	6.6471	6.48309	5.5387	6.70542	6.66525	6.30312	6.18569	6.33904	6.77097	6.4319
EVM0050889	0.836742	1.1386	1.00681	0.994049	3.60236	3.44511	4.16643	3.73796	1.12887	1.28815	0.71856	1.0452	0.10062	0.176472	0.217559	0.164884	0.370845	0.221346	0.481953	0.358048	4.18554	3.29203	2.60866	3.36208	3.27856	3.22157	3.05535	3.18516	2.00044	2.82299	3.18911	2.67084	0.41386	0.706053	0.596378	0.572097	0.92116	1.06174	0.316182	0.76636
EVM0019488	2.16376	2.20542	2.27554	2.21491	1.31662	1.06355	1.29051	1.22356	0.720337	0.702164	0.700996	0.707832	1.10254	1.30734	1.39727	1.26905	1.68336	1.54002	1.30589	1.50976	3.60019	3.32654	3.06628	3.331	2.4307	2.59031	2.5889	2.53663	1.59935	1.93096	1.53885	1.68972	2.57615	3.05094	2.80178	2.80962	2.34211	3.27848	2.62311	2.7479
EVM0019489	25.1864	26.6392	26.949	26.2582	37.886	35.9537	32.168	35.3359	35.6789	35.8168	33.0084	34.8347	21.6267	20.0597	25.001	22.2291	29.4793	27.438	24.7923	27.2365	27.4032	22.7066	29.3685	26.4928	56.7327	53.056	52.7302	54.173	54.9423	55.4557	55.68	55.3593	28.6672	28.4501	29.4525	28.8566	39.0357	39.062	41.6329	39.9102
EVM0029713	0.471896	0.303981	0.480406	0.418761	0.834859	0.655966	0.939338	0.810054	1.17241	1.00025	1.00369	1.05878	0.479034	0.570961	0.652157	0.567384	0.471258	0.524093	0.588786	0.528046	1.29298	0.934689	1.03294	1.08687	1.51643	1.18531	1.47478	1.39217	1.23347	1.70212	1.1825	1.3727	0.945485	0.758114	0.55838	0.753993	1.02029	0.748878	0.995033	0.921399
EVM0029712	2.95068	3.43955	2.76401	3.05142	1.69151	1.99282	1.04559	1.57664	4.6998	2.71035	3.40491	3.60502	4.4423	3.65588	3.96508	4.02108	6.45391	7.16186	4.97931	6.19836	3.27644	3.11985	3.1992	3.1985	1.10225	1.26922	1.24822	1.20656	3.10749	3.06366	3.05081	3.07399	2.73555	2.40767	2.20854	2.45058	3.42511	2.74092	3.28561	3.15055
EVM0005403	1.45596	1.66494	1.60847	1.57645	1.84016	2.08438	1.21502	1.71319	1.92022	1.76958	1.74388	1.81122	2.48135	2.54739	2.73983	2.58953	1.68298	1.60699	1.50138	1.59712	0.095293	0.124045	0.200037	0.139792	0.07584	0.123684	0.129945	0.109823	0.184545	0.23111	0.134847	0.183501	0.137595	0.142747	0.141838	0.140727	0.248046	0.147861	0.171498	0.189135
EVM0029719	8.34973	8.85225	8.85968	8.68722	4.87003	4.21809	5.10704	4.73172	4.13356	4.10522	4.59244	4.27707	3.70984	3.6553	3.94862	3.77125	6.13245	6.25961	5.95024	6.1141	6.1445	6.18148	5.6914	6.00579	2.86314	3.02814	2.76347	2.88491	2.15602	2.37805	2.65908	2.39772	1.0993	0.981815	1.39372	1.15828	1.50493	1.82008	1.57963	1.63488
Salix_babylonica_newGene_5269	1.09894	0.872597	1.90426	1.29193	0.673682	0.596436	0.885003	0.718374	0.757293	0.89878	0.655742	0.770605	1.77376	1.69938	2.16546	1.87953	1.41816	1.42747	1.35417	1.39993	1.25186	1.63606	1.43442	1.44078	1.4058	1.52093	0.856744	1.26116	1.24243	0.980218	0.956041	1.05956	1.345	0.95385	0.999895	1.09958	2.22955	1.69556	1.9144	1.9465
EVM0009056	1.19795	1.51537	1.65278	1.45537	7.1907	7.09622	5.91188	6.73293	3.96942	4.17938	4.97314	4.37398	4.52859	4.96067	4.53599	4.67508	2.34543	3.26005	3.05991	2.88846	0.78942	0.484166	0.903986	0.725857	6.68206	6.00343	6.90247	6.52932	5.30155	4.3977	4.93803	4.87909	6.61579	6.29037	7.9527	6.95295	6.66816	6.44291	6.27308	6.46138
EVM0026360	4.66315	5.13299	3.95747	4.58454	2.6448	1.47797	1.46867	1.86381	4.28196	4.34952	4.61687	4.41612	4.97781	6.67408	5.69477	5.78222	2.61617	1.45076	2.07188	2.04627	3.50635	2.56358	3.57143	3.21379	2.11145	1.68886	2.83004	2.21012	0.688992	1.5005	0.70251	0.964	0.983297	0.928056	0.51736	0.809571	0.724503	1.02139	1.41395	1.05328
EVM0009057	1.00022	1.31039	1.68562	1.33208	1.27496	1.75625	1.28391	1.43838	1.27645	1.57104	1.15042	1.33264	0.937564	0.204846	0.601382	0.581264	0.828894	0.91778	0.854025	0.8669	2.32634	2.6181	3.04061	2.66169	3.44474	4.13245	3.4564	3.67786	3.46114	4.61855	4.01015	4.02995	3.55205	3.53867	3.64256	3.57776	2.75004	3.10457	3.37468	3.07643
EVM0020988	0.470866	0.540077	0.740211	0.583718	0.419112	0.679276	0.461892	0.520093	0.525132	0.273108	0.095186	0.297809	0.143469	0.185018	0.197108	0.175198	0.465867	0.540249	0.532717	0.512944	0.441599	0.351693	0.428324	0.407205	0.372526	0.324168	0.413545	0.37008	0.157207	0.359222	0.368661	0.29503	0.373387	0.358478	0.229565	0.320477	0.441855	0.494043	0.664453	0.53345
EVM0019157	0.573858	0.519643	0.444973	0.512825	0.509687	0.563836	0.501582	0.525035	0.895513	0.609493	0.736208	0.747071	0.423224	0.445126	0.434212	0.434187	0.752727	0.415204	0.372004	0.513312	0.954637	0.715249	0.522428	0.730771	0.510398	0.627424	0.662998	0.600273	1.56412	1.44568	1.27314	1.42765	0.3591	0.437849	0.829914	0.542288	0.373827	0.68534	0.705842	0.588336
EVM0050883	4.03665	4.75791	5.41112	4.73523	3.99038	4.10286	3.94438	4.01254	4.93341	4.20688	4.16362	4.43463	3.2718	3.86073	4.31365	3.81539	3.38596	4.09509	3.63069	3.70391	1.95721	3.0003	2.84721	2.60157	1.69264	1.41332	2.1358	1.74725	1.70274	2.10951	1.81609	1.87611	2.4872	1.72439	1.75783	1.9898	1.94309	1.35414	2.32194	1.87306
EVM0011369	0.514564	0.444782	0.463761	0.474369	0.152481	0.426197	0.319362	0.299347	0.147512	0.147256	0.276887	0.190552	0.05162	0.061606	0.27439	0.129205	0.154255	0.107284	0.04599	0.10251	0.660426	0.900984	0.745837	0.769082	0.791005	0.896106	0.840991	0.842701	0.778856	0.793175	0.96191	0.844647	0.621787	0.609077	0.564427	0.59843	0.715146	1.05502	0.524367	0.764845
EVM0011366	1.31803	1.4342	1.24514	1.33246	2.14906	1.40495	1.39294	1.64898	1.24145	1.07796	1.76322	1.36088	0.773904	1.00693	0.602505	0.794445	1.53567	1.23546	1.34889	1.37334	4.24053	4.07091	4.70155	4.33766	3.65913	2.974	2.8628	3.16531	5.01112	6.41166	4.64723	5.35667	3.18091	2.38176	2.33316	2.63194	2.9429	2.69064	2.30523	2.64626
EVM0015860	0.298243	0.608658	0.353468	0.420123	0.221354	0.167475	0.154822	0.181217	0.06344	0.169105	0.156624	0.129723	0.035441	0.141418	0.035709	0.070856	0.062214	0.180688	0.012957	0.0852863	3.17238	3.10713	3.03442	3.10464	3.19042	2.81736	2.43898	2.81558	2.82858	2.95249	2.74778	2.84295	2.09681	1.96842	1.6557	1.90698	1.41978	1.97789	2.18967	1.86245
EVM0015862	80.1141	76.5219	76.0187	77.5516	26.5176	28.0816	26.7781	27.1258	29.6178	28.6787	28.6609	28.9858	16.0624	17.585	19.1876	17.6117	29.0876	29.4953	28.3315	28.9715	65.4568	65.727	65.277	65.4869	20.7632	21.9145	20.8487	21.1755	27.0124	27.6825	28.501	27.732	18.0979	17.2686	17.4951	17.6205	23.4554	23.1225	23.779	23.4523
EVM0026710	1.04382	1.04152	1.21171	1.09902	0.080991	0.044123	0.320068	0.148394	0	0	0	0	0.045632	0	0	0.0152107	0	0.104456	0	0.0348187	0	0	0	0	0.128552	0.086068	0	0.07154	0	0	0.086101	0.0287003	0	0	0	0	0	0	0	0
EVM0034578	77.6448	80.7032	79.4593	79.2691	122.245	124.016	129.669	125.31	74.4736	72.2089	71.4671	72.7165	35.7474	33.3503	37.8535	35.6504	34.6815	31.9365	30.0492	32.2224	69.6806	73.1173	71.9887	71.5955	110.684	109.744	107.189	109.205	74.0548	75.0761	75.3978	74.8429	40.1593	43.534	40.4885	41.3939	39.628	38.3801	40.422	39.4767
EVM0034576	4.13545	3.60227	4.9014	4.21304	2.35289	2.25904	2.69618	2.43604	2.61729	3.0364	2.63535	2.76301	1.13914	1.80006	1.67303	1.53741	1.5878	2.20606	1.48186	1.75857	4.78866	4.08418	5.05629	4.64304	2.34552	2.24641	2.26187	2.2846	2.14342	2.4067	2.48295	2.34436	2.03602	1.24119	2.03881	1.77201	1.39535	2.23766	2.82061	2.15121
EVM0034570	1.24323	1.08751	1.396	1.24225	0.804104	0.833698	0.799852	0.812551	1.60342	1.39212	1.44309	1.47954	1.93962	1.4807	1.9831	1.80114	2.00765	1.92092	2.67149	2.20002	2.55354	2.78505	3.22812	2.85557	1.45305	1.43922	1.4951	1.46246	2.00884	1.91089	2.0798	1.99985	2.09442	2.59284	1.98923	2.2255	3.19131	2.55833	3.05212	2.93392
EVM0025815	10.5878	10.8747	10.4069	10.6231	6.55892	7.13663	8.11313	7.26956	8.80408	8.54747	8.85166	8.7344	2.58567	3.19309	3.26308	3.01394	4.15412	3.95028	3.86268	3.98903	8.85608	9.38442	9.37139	9.20396	5.36064	5.7818	5.70743	5.61662	7.46626	8.40883	7.36371	7.74627	2.13089	2.65741	2.35232	2.38021	4.21928	3.84537	3.42532	3.82999
EVM0025813	5.0788	5.00084	4.0955	4.72505	1.78236	2.03542	1.84585	1.88788	1.16339	0.757861	0.791485	0.904246	0.279622	0.386694	0.541985	0.402767	0.484362	0.670705	0.363999	0.506355	1.60942	1.91008	1.80743	1.77564	1.76644	1.7343	1.64605	1.7156	0.652512	0.648253	0.404925	0.568563	0.310628	0.459235	0.593538	0.454467	0.243575	0.666885	0.476143	0.462201
EVM0025819	9.21034	9.37194	8.43256	9.00495	7.79669	6.40756	8.03978	7.41468	4.5005	5.34997	4.99798	4.94948	3.14378	3.30276	3.25046	3.23233	6.67664	4.56349	3.65948	4.96654	4.64593	5.6747	6.05438	5.45834	4.09666	5.04014	4.45683	4.53121	6.96574	4.93077	6.02089	5.97247	2.91854	2.71378	3.31182	2.98138	5.06139	4.96888	4.35789	4.79605
EVM0021123	5.14629	7.11003	4.92091	5.72574	6.99716	8.02211	6.92519	7.31482	2.56963	3.40643	2.94201	2.97269	2.49581	4.07697	3.05417	3.20898	2.78916	2.32939	5.44275	3.52043	3.36792	2.65017	4.04952	3.35587	5.02146	4.61574	4.8829	4.84003	6.2025	6.56757	6.93092	6.567	3.30814	3.457	4.98371	3.91628	7.21789	4.57432	5.68113	5.82444
EVM0028442	6.66627	7.54798	5.93941	6.71789	3.73174	3.33218	3.43787	3.5006	2.44346	1.85421	2.89948	2.39905	2.24022	1.53797	2.16747	1.98189	1.54184	1.70433	2.88913	2.0451	5.93091	4.77594	6.3944	5.70042	7.37082	10.6579	8.75503	8.9279	7.13248	5.96612	5.63094	6.24318	3.63002	3.62676	3.27458	3.51045	3.41542	3.60028	3.13129	3.38233
EVM0028443	21.6623	22.1612	23.7301	22.5179	15.4833	16.5283	17.1805	16.3974	12.4902	12.9967	12.5193	12.6687	7.70097	7.76779	6.72428	7.39768	8.81851	8.56933	9.98294	9.12359	15.177	15.8221	14.5836	15.1942	12.4662	13.456	12.419	12.7804	10.1368	10.3738	11.4958	10.6688	10.3611	9.57705	8.1532	9.36379	7.4039	7.03575	7.08913	7.17626
EVM0028440	3.11536	3.02224	2.90175	3.01312	2.86629	2.70858	2.97727	2.85071	5.01565	4.18344	4.45553	4.55154	5.40969	6.44417	6.0443	5.96605	5.25259	4.90703	5.29285	5.15082	2.95028	2.73248	2.78531	2.82269	2.86706	2.85623	3.10477	2.94269	2.4966	2.89608	2.56629	2.65299	2.73117	3.08051	3.2209	3.01086	3.80009	4.04307	3.56809	3.80375
EVM0028447	2.44325	2.88992	2.41287	2.58201	1.45069	1.46299	1.00598	1.30655	1.24967	1.2585	1.65968	1.38928	1.26536	0.967071	1.19388	1.1421	1.88322	1.39567	1.18496	1.48795	1.69915	1.61244	2.22167	1.84442	0.82177	1.02023	0.921772	0.921259	1.08448	0.686852	1.0377	0.936346	0.493017	0.627081	0.50165	0.540583	0.967527	1.11644	0.772514	0.952159
EVM0039018	2.0959	2.48197	2.17374	2.25053	8.93944	8.67008	7.92396	8.51116	0.644226	1.09959	0.867392	0.870404	1.15019	0.756545	0.59568	0.834138	0.666677	1.04053	1.14672	0.95131	2.48124	1.97042	2.2337	2.22845	2.24182	3.75664	2.83982	2.94609	0.525345	0.939466	1.28777	0.917528	0.462656	0.443753	0.58608	0.497496	0.887406	0.635721	0.734391	0.752506
EVM0043372	0.225795	0.382991	0.354128	0.320971	0.117844	0.360845	0.11838	0.199023	0.324115	0.257595	0.183176	0.254962	0.211679	0.052604	0.32234	0.195541	0.519512	0.296791	0.375224	0.397176	0.707112	0.459925	0.459301	0.542113	0.42535	0.505556	0.545681	0.492196	0.282712	0.337724	0.443423	0.35462	0.291957	0.445272	0.279616	0.338948	0.680127	0.57422	0.623287	0.625878
EVM0025393	0.383404	0.420651	0.387706	0.397254	2.59357	3.07733	2.76084	2.81058	1.66304	1.16674	1.6883	1.50603	0.733727	0.970158	0.797041	0.833642	0.193088	0.301617	0.365078	0.286594	1.32352	0.158709	0.730362	0.737531	1.3272	1.71438	1.69862	1.58007	0.697252	0	0.054961	0.250738	1.7816	1.25434	1.20602	1.41399	0.152933	0.331401	0.62359	0.369308
EVM0035198	0.750132	1.17602	1.06672	0.997623	0.137481	0.450608	0.153488	0.247192	1.45512	0.861857	1.18381	1.16693	3.80562	2.92368	2.88529	3.20486	4.92716	5.90939	4.22049	5.01901	2.11015	3.47005	3.09264	2.89095	0.193123	0.367865	0.358527	0.306505	1.23032	1.49022	1.47044	1.397	1.99988	2.66725	1.85725	2.17479	3.33888	4.7995	4.55923	4.23254
EVM0035199	10.4998	10.7795	10.6227	10.634	6.92447	6.93661	8.2198	7.3603	11.4279	11.82	10.113	11.1203	15.4861	14.6748	15.3663	15.1757	19.1805	18.8337	19.9055	19.3066	18.8881	18.5358	21.4926	19.6388	12.1902	11.6901	13.3372	12.4058	18.3736	18.1179	17.9854	18.159	19.4167	19.0135	19.2952	19.2418	24.449	23.432	22.9546	23.6119
EVM0035192	4.85597	6.19745	4.1485	5.06731	4.85355	5.51113	5.6015	5.32206	5.57514	5.29704	5.24944	5.37387	5.07595	5.18586	4.62952	4.96378	2.16024	3.04903	3.46647	2.89191	3.11215	2.76575	2.71806	2.86532	8.38428	9.79879	7.8236	8.66889	3.24569	2.84342	2.60095	2.89669	2.94595	1.97958	2.18544	2.37032	2.42425	2.54668	2.30543	2.42545
EVM0035193	5.72312	7.15308	5.68414	6.18678	4.29922	4.62109	3.70355	4.20795	6.39084	5.23874	4.77315	5.46758	2.05738	2.93875	1.99337	2.32983	3.90054	3.2218	4.00515	3.70917	3.88906	3.70619	4.09117	3.89547	2.00301	2.26191	2.3017	2.18887	1.86693	2.46186	2.77484	2.36788	1.06796	1.76843	1.28425	1.37355	1.90038	1.83255	1.10201	1.61165
EVM0035190	2.86099	1.92796	2.92589	2.57161	6.12457	3.90868	5.50799	5.18041	0.951825	1.60999	1.3074	1.28974	0.641204	0.396758	0.739811	0.592591	0.574683	1.27372	0.743122	0.863843	0	0	0	0	0	0	0	0	0	0	0	0	0	0	0	0	0	0	0	0
EVM0026713	10.5345	10.3695	12.0253	10.9764	2.54843	3.4948	2.98594	3.00972	4.30589	5.93013	3.81754	4.68452	2.12309	3.18585	2.82309	2.71068	4.25192	4.43635	4.59615	4.42814	8.17772	5.81884	6.78603	6.92753	3.66192	4.95098	4.36789	4.32693	5.59544	5.61622	6.42647	5.87938	5.31869	3.88773	5.21958	4.80867	6.26908	6.60116	6.88288	6.58437
EVM0037878	3.84483	4.2557	4.03611	4.04555	1.01158	1.20759	2.35653	1.52524	1.66923	2.12396	2.77302	2.18873	0.487829	0.339567	0.8033	0.543565	1.27082	1.21104	1.05734	1.17973	1.74171	1.37744	1.64094	1.5867	1.48672	1.77129	1.71466	1.65755	1.29627	2.39713	1.99631	1.89657	0.53442	0.207458	0.321519	0.354466	0.369617	0.474739	0.088092	0.310816
EVM0013392	5.39958	5.44991	5.50611	5.45187	4.17715	3.92724	3.6294	3.91126	2.92682	3.22396	3.32655	3.15911	1.66809	1.56412	1.46389	1.56536	2.48338	2.34575	1.80041	2.20985	2.92026	4.19195	3.60187	3.57136	1.97924	2.07376	2.15261	2.06854	2.39035	2.87001	2.52319	2.59451	0.984554	1.35998	1.16508	1.16987	1.74831	1.32316	2.34754	1.80634
EVM0031082	8.45297	7.69171	8.87531	8.34	12.952	13.5764	11.4247	12.6511	5.73188	5.48154	5.98254	5.73198	4.68205	4.19514	6.20515	5.02745	3.23527	4.4174	3.44558	3.69942	8.90126	7.32333	7.27503	7.83321	16.8924	17.5331	15.2369	16.5541	5.9997	5.48108	6.28786	5.92288	6.20285	5.75581	7.21094	6.38987	6.76286	6.87588	7.85821	7.16565
EVM0004068	5.09082	6.22366	5.13823	5.48423	0.299231	0.521653	0.171074	0.330653	0.299483	0.351517	0.090723	0.247241	0.746184	0.877725	0.284117	0.636009	1.1572	2.21416	2.34351	1.90496	12.0199	11.4526	10.9946	11.489	1.7389	2.4702	2.19756	2.13556	0.224002	0.689988	0.541512	0.485167	3.23198	4.16825	3.57193	3.65739	4.47737	4.70785	6.1681	5.11777
EVM0035224	84.3907	95.2179	76.5985	85.4023	83.0656	87.782	90.289	87.0455	51.1323	48.9986	48.2706	49.4672	12.6909	14.5892	13.8231	13.7011	16.2228	18.3797	14.3335	16.312	75.5357	78.9107	81.9819	78.8094	60.8577	62.033	56.2967	59.7291	29.9345	36.8729	38.4472	35.0849	21.3519	18.8654	19.573	19.9301	19.458	16.8096	19.4136	18.5604
EVM0035227	1.49694	1.29112	1.5364	1.44149	2.68395	2.79444	2.41679	2.63173	1.73991	1.09909	1.67637	1.50512	0.62578	0.759595	0.61885	0.668075	2.30959	2.9786	2.67517	2.65445	4.15459	3.55254	3.65593	3.78769	2.43077	1.56318	3.00177	2.3319	1.48358	1.41685	1.40094	1.43379	3.08115	2.73741	3.33034	3.04964	3.46185	2.64674	2.17035	2.75965
EVM0035223	16.6952	13.3517	16.0099	15.3523	13.5692	13.1732	12.4467	13.063	20.0154	20.779	22.0448	20.9464	32.3827	32.9611	33.9646	33.1028	20.2535	24.6922	23.0147	22.6535	15.0437	15.8843	14.283	15.0703	13.6457	14.937	14.8212	14.468	16.7698	17.6409	18.4243	17.6117	22.3626	26.1935	27.8788	25.4783	23.4784	23.9802	19.159	22.2058
EVM0001670	152.2	129.049	133.887	138.379	147.409	152.19	145.522	148.374	84.7582	81.5824	83.4119	83.2508	39.9632	40.7956	42.197	40.9853	65.9277	70.7686	73.3412	70.0125	137.689	141.785	150.808	143.427	55.8452	58.7327	57.1644	57.2475	99.1512	98.3678	96.9208	98.1466	41.5857	42.5714	41.7719	41.9763	49.1341	48.4825	49.9486	49.1884
EVM0046879	0.30407	0.358983	0.28002	0.314358	0.022253	0.035463	0.13513	0.064282	0.02664	0.023691	0.023887	0.0247393	0.012429	0.012042	0.049983	0.024818	0.091544	0.013653	0.013694	0.0396303	1.51115	1.36249	1.56651	1.48005	0.902027	0.65501	0.618998	0.725345	1.06162	0.523094	0.537696	0.707471	0.82738	0.470122	0.439957	0.579153	1.19915	1.0018	0.630874	0.943942
EVM0001675	6.76447	7.73361	6.17751	6.89187	8.02985	8.69829	8.38406	8.37074	9.55661	10.6097	9.86721	10.0112	5.85204	5.48928	5.33446	5.55859	6.1986	4.58791	6.30698	5.69783	4.71706	3.81883	4.02396	4.18662	23.6815	21.5136	23.0467	22.7472	26.3762	26.2706	26.7167	26.4545	18.1193	17.8063	17.7078	17.8778	29.7611	29.7619	31.0332	30.1854
EVM0001677	3.63887	2.53563	3.83863	3.33771	1.78218	2.14741	1.62288	1.85082	1.68199	1.50599	0.889356	1.35911	0.959134	0.864006	0.354897	0.726012	1.75183	1.2698	1.52555	1.51573	3.24863	3.17683	2.35017	2.92521	2.94297	2.106	2.25869	2.43589	1.22958	1.47291	1.61328	1.43859	0.569615	0.797465	1.23572	0.867599	1.77273	1.69015	1.34907	1.60398
EVM0057087	0.608527	0.998411	0.887658	0.831532	5.46583	5.47533	4.63995	5.1937	0.996165	1.76988	1.52202	1.42935	2.23636	1.29383	1.72402	1.7514	1.02363	1.33351	0.991453	1.1162	0.446396	0.560304	0.589483	0.532061	5.74533	4.77529	6.23514	5.58525	2.78568	3.83601	3.5303	3.384	5.64804	5.2001	4.61142	5.15318	6.54441	7.06647	5.43954	6.35014
EVM0046876	1.82085	2.09368	1.83702	1.91718	2.17913	1.47415	2.29306	1.98211	3.25961	3.3289	3.88277	3.49043	3.23025	3.82829	3.032	3.36351	2.97338	3.87777	4.46845	3.7732	2.28368	2.59633	2.43313	2.43771	0.898341	2.25192	2.14601	1.76542	3.47648	3.35954	3.27303	3.36968	2.59702	3.62625	2.20743	2.81023	3.29476	2.68864	2.66789	2.88377
EVM0036555	2.28182	1.93127	1.72756	1.98022	1.05497	1.14325	1.60998	1.2694	1.96192	1.81399	1.29346	1.68979	0.86276	0.79557	0.603538	0.753956	1.70329	1.94084	1.24777	1.63063	1.84414	1.41701	2.0771	1.77941	2.26706	2.24805	2.57428	2.36313	3.69094	2.97081	2.74765	3.13647	0.745708	1.05981	0.755222	0.853578	0.7937	1.87102	0.915723	1.19348
EVM0032649	1.62819	1.7686	1.74811	1.71497	0.114563	0.140569	0.085179	0.113437	0.137196	0.134107	0.187125	0.152809	0.178262	0.307567	0.596745	0.360858	0	0.234899	0.145087	0.126662	0.516508	0.374357	0.189968	0.360278	0.335388	0.230562	0.161286	0.242412	0.04662	0.430412	0.192372	0.223135	0.646412	0.422573	0.372588	0.480524	0.365277	0.569923	0.366716	0.433972
EVM0048513	7.71409	6.16995	7.39242	7.09215	6.13608	7.48707	7.53925	7.05413	5.12293	5.81173	4.68859	5.20775	10.0642	10.1363	10.6312	10.2772	7.99896	7.73382	8.21709	7.98329	4.15241	2.97015	3.64962	3.59073	8.00096	8.81126	8.06843	8.29355	3.27399	3.96827	3.70879	3.65035	8.53575	7.95905	8.09821	8.19767	5.27797	5.47399	6.73516	5.82904
EVM0032642	1.66453	2.08881	1.4796	1.74431	0.817101	1.08906	2.02422	1.31013	1.0969	1.55125	1.98684	1.545	0.652169	0.929208	1.60492	1.0621	1.61379	0.640719	1.60159	1.28536	1.99192	2.15633	1.51602	1.88809	1.67819	2.07566	1.44474	1.73287	0.397168	0.979124	1.24408	0.873456	1.27298	1.25304	0.872273	1.13277	0.718547	0.445156	1.0751	0.746268
EVM0032640	6.98065	7.02555	7.18612	7.06411	14.0454	14.0744	14.9551	14.3583	5.52219	6.94155	6.22572	6.22982	6.06183	5.34574	6.61532	6.00763	4.94423	5.04097	6.44131	5.4755	7.79193	7.64467	7.52352	7.65337	14.342	14.858	14.3917	14.5305	7.29299	6.97706	6.28567	6.8519	6.61502	6.9108	6.10779	6.54454	6.68329	6.49541	6.96531	6.71467
EVM0032647	2.44039	3.98027	2.86733	3.096	1.30226	1.8926	1.69752	1.63079	5.46494	3.97469	4.74312	4.72758	4.0474	5.04261	3.67952	4.25651	4.12242	3.25861	3.67755	3.68619	3.50836	2.65205	3.61647	3.25896	3.12586	2.82402	3.56858	3.17282	3.3474	3.04196	3.27716	3.22217	2.82533	3.1638	3.29583	3.09499	3.26743	2.29651	2.25614	2.60669
EVM0032644	14.4296	15.9672	14.2619	14.8862	12.4941	12.3518	13.3884	12.7448	13.6211	13.4959	12.4106	13.1759	32.617	31.7042	34.6699	32.9971	32.1369	29.4808	29.9675	30.5284	14.3209	14.5973	14.3719	14.43	12.8801	14.1544	13.3878	13.4741	12.3676	13.1346	13.5121	13.0048	31.4888	30.6929	32.2439	31.4752	34.1025	31.7339	32.1287	32.655
EVM0027286	1.87352	1.80203	1.83909	1.83821	1.84825	1.9009	1.88558	1.87825	2.63092	3.46063	2.57803	2.88986	4.16856	3.51111	4.25007	3.97658	4.04581	3.0761	3.97002	3.69731	2.83034	2.76803	2.25201	2.61679	2.34668	2.02849	2.3365	2.23722	2.54747	1.94764	2.38625	2.29379	3.40454	3.2758	3.16958	3.28331	3.59311	3.29209	3.16487	3.35002
EVM0056480	2.70083	3.06384	2.24354	2.6694	3.1805	3.00763	3.09608	3.09474	3.06806	2.61897	3.16478	2.9506	2.40287	2.23567	2.63721	2.42525	2.69861	2.93033	2.62374	2.75089	3.59231	3.43978	3.15405	3.39538	4.86549	3.59897	4.78627	4.41691	1.36847	1.93156	2.19969	1.83324	2.30674	1.80295	2.78963	2.29977	2.36737	2.58744	2.80821	2.58767
EVM0033188	1.73716	1.48607	1.35249	1.52524	1.23313	1.31759	0.712013	1.08758	0.809074	1.44413	1.18568	1.14629	1.55302	1.93006	2.08948	1.85752	1.39659	1.90677	1.83448	1.71261	0.553332	0.866427	0.614968	0.678242	0.378664	0.592631	0.495261	0.488852	0.51896	0.806071	1.02648	0.783836	0.555036	0.964676	0.861374	0.793695	0.868673	0.87449	0.87119	0.871451
EVM0044238	0.913504	1.49828	1.71748	1.37642	4.06528	4.38333	3.86973	4.10611	1.95745	2.04117	1.79891	1.93251	2.12639	1.60504	2.01898	1.9168	3.95218	3.50298	4.2364	3.89719	1.15797	1.45294	1.13229	1.24773	5.31334	7.31783	7.18763	6.60627	9.70752	9.18008	11.3639	10.0838	16.5951	11.7442	12.0604	13.4665	12.8087	9.90375	10.379	11.0305
EVM0036889	0.328433	0.221516	0.060861	0.203603	0.423924	0.267967	0.698322	0.463404	1.71903	1.88292	0.989073	1.53034	0.80358	1.10336	1.65287	1.1866	1.00852	1.5438	1.62376	1.39203	2.95587	1.80169	2.30615	2.35457	1.15963	1.40599	1.27629	1.28064	3.27408	4.18917	4.87312	4.11212	3.02378	3.25635	2.95005	3.07673	3.48872	2.91116	3.04619	3.14869
EVM0039859	5.94979	5.06591	6.09248	5.70273	2.4727	1.84781	2.17155	2.16402	1.85349	2.425	1.83894	2.03914	2.60493	2.06037	2.73355	2.46629	2.94668	4.38261	2.93004	3.41978	2.77931	2.87183	3.26772	2.97295	0.583607	1.10623	0.957029	0.882288	1.66628	1.74441	0.991303	1.46733	1.614	1.40448	1.12564	1.38138	2.04268	2.29844	1.66287	2.00133
EVM0039858	11.4753	13.0288	11.9305	12.1448	18.728	23.7689	18.5887	20.3619	23.9249	26.9577	26.8924	25.925	25.5112	22.2751	23.4879	23.7581	21.6703	22.3775	23.9031	22.6503	13.7205	13.85	15.4274	14.3327	16.9732	15.8204	17.8365	16.8767	23.719	25.496	22.2521	23.8224	27.1461	26.7813	24.5147	26.1474	22.3298	21.9739	21.6079	21.9705
EVM0039857	63.8685	61.4426	61.524	62.2784	25.6519	26.2082	24.8927	25.5843	24.5438	25.4956	21.9918	24.0104	21.9853	23.9917	24.0736	23.3502	15.0772	11.8958	11.19	12.721	11.627	12.289	13.2424	12.3861	21.236	20.9549	21.9143	21.3684	4.12962	5.8187	4.65277	4.86703	8.52429	9.21945	10.4964	9.4134	7.26148	8.82407	8.8965	8.32735
EVM0048433	1.45727	0.866433	1.05893	1.12755	1.40366	1.79981	1.44342	1.54896	0.558922	0.935099	1.27104	0.921687	0.956021	1.22473	1.15763	1.11279	0.826596	1.0632	1.34771	1.07917	1.76993	2.28612	1.86528	1.97378	2.57512	2.67578	2.07806	2.44298	0.682785	1.49243	1.08056	1.08526	1.63496	1.5584	1.28167	1.49168	1.42613	1.87961	1.16915	1.49163
EVM0057083	1.93972	1.56922	1.7406	1.74985	1.88172	2.35628	2.03761	2.09187	3.11081	3.46283	4.39557	3.6564	1.28167	2.39598	1.97095	1.88287	1.67004	2.25848	1.34476	1.75776	2.89815	2.64667	2.68567	2.7435	3.88781	3.89256	3.53219	3.77085	6.96141	7.38649	5.83999	6.72929	4.85259	5.45075	4.05639	4.78658	4.14587	4.29062	3.33076	3.92242
EVM0000103	7.64566	8.66916	7.68575	8.00019	6.4974	4.96788	6.31135	5.92555	5.32537	4.70858	4.37246	4.80214	3.2475	2.58479	2.34026	2.72418	3.49189	3.97334	4.009	3.82474	7.16092	6.69458	7.1157	6.9904	6.9322	7.56846	6.4592	6.98662	6.58485	6.76482	6.03977	6.46315	2.78664	3.52948	4.51723	3.61112	4.67533	4.36637	4.72999	4.59056
EVM0000102	38.9209	39.2478	38.1151	38.7613	81.3144	71.3251	80.8249	77.8215	35.5972	31.2592	33.4882	33.4482	26.7486	26.6914	27.4434	26.9611	17.7262	18.6241	19.7908	18.7137	28.3401	25.9651	25.8993	26.7348	46.3712	46.7132	47.8672	46.9838	24.6267	27.028	28.5134	26.7227	25.3243	22.9157	25.6865	24.6422	19.5224	20.259	22.7418	20.8411
EVM0000104	1.01695	0.755624	0.634293	0.802289	2.91159	4.07253	3.31418	3.43276	1.73529	1.57489	1.74654	1.68557	0.259836	0.274145	0.260706	0.264896	0.311537	0.178384	0.384607	0.291509	2.48447	2.23155	2.22818	2.31473	6.1737	7.37176	8.13185	7.22577	5.7472	5.39801	5.86151	5.66891	0.636968	0.899667	0.715582	0.750739	1.00992	1.26774	1.83829	1.37198
EVM0000108	2.11634	1.90064	1.61525	1.87741	1.43945	1.52205	1.48818	1.48323	1.37586	1.37209	1.25215	1.33337	0.832754	0.73123	0.565852	0.709945	1.0391	1.21553	1.39992	1.21818	3.11751	2.66482	2.68139	2.82124	1.92223	1.80582	2.27415	2.00073	1.40657	2.38534	2.12845	1.97345	1.29836	1.12106	1.42217	1.28053	1.89832	2.24081	2.05731	2.06548
EVM0037682	5.97715	6.1312	5.73071	5.94635	7.00867	7.22267	7.87629	7.36921	8.13598	7.46657	8.86048	8.15434	9.32595	9.95469	9.17509	9.48524	10.9557	10.6948	10.3963	10.6822	15.6444	13.5396	15.2558	14.8133	15.4602	16.9781	18.0547	16.831	21.7637	21.1694	20.5061	21.1464	17.2202	17.9252	16.4543	17.1999	19.702	18.11	18.2906	18.7009
EVM0037685	28.7292	33.37	31.324	31.1411	23.1458	21.8744	21.9088	22.3097	10.6731	10.7778	10.7666	10.7392	5.09086	6.70753	6.20501	6.00113	11.3634	11.5797	13.5633	12.1688	40.0599	32.8995	36.3031	36.4208	34.8483	32.5895	29.969	32.469	26.0199	22.5721	21.0566	23.2162	10.7312	12.0332	10.8028	11.1891	18.6018	16.8514	16.8285	17.4272
EVM0037686	14.8389	18.3982	16.939	16.7254	15.6176	13.9435	13.2813	14.2808	7.25732	8.19513	9.23493	8.22912	21.2829	22.1457	19.1739	20.8675	27.2786	24.1985	24.2507	25.2426	3.19072	4.14725	3.51383	3.61727	1.79102	2.47593	2.10405	2.12367	1.2265	1.56502	1.76667	1.5194	2.48237	2.4409	2.29373	2.40567	2.87361	1.84317	2.39355	2.37011
EVM0037687	1.85913	1.30148	1.54222	1.56761	0.881494	0.862401	0.914231	0.886042	1.05801	0.282514	0.812116	0.717547	0.673183	0.519657	0.824384	0.672408	0.726108	0.772449	1.01357	0.837377	1.22641	1.15043	0.990764	1.12254	0.543291	0.702172	0.293037	0.512833	0.625889	0.600336	0.532059	0.586095	0.239811	0.197576	0.623774	0.35372	0.192984	0.50675	0.422402	0.374045
EVM0001099	6.57182	5.43188	5.00286	5.66885	3.23007	3.55387	3.23419	3.33938	1.71571	2.03089	2.05565	1.93408	0.115159	0.456663	0.41665	0.329491	1.74707	2.40247	2.62345	2.25766	5.26777	3.47692	3.74571	4.16347	7.40659	5.48683	5.15218	6.0152	5.86763	5.24243	5.16074	5.4236	2.41626	2.52953	2.64719	2.53099	3.68205	4.83428	3.58381	4.03338
EVM0033593	3.58178	3.01132	3.12325	3.23878	5.71275	5.09148	5.31341	5.37255	3.71422	3.06539	4.2742	3.6846	3.48619	2.81795	3.29696	3.20037	2.45388	1.76035	1.95958	2.05794	1.62412	1.75716	1.21447	1.53192	1.2275	0.986328	1.45372	1.22251	0.536225	0.210799	0.558437	0.435154	0.28519	0.413397	0.163756	0.287448	0.546865	0.906689	0.713867	0.722474
EVM0033596	11.4387	9.34601	9.54432	10.1097	9.56416	9.10297	8.92286	9.19666	27.3731	30.2728	30.7859	29.4773	15.2333	12.9496	14.6626	14.2818	11.952	8.97983	9.79279	10.2416	8.21989	7.85801	8.30212	8.12667	15.9208	18.3989	15.5052	16.6083	32.6267	32.1668	33.828	32.8738	17.9858	17.3409	18.494	17.9402	15.008	14.8454	14.1189	14.6574
EVM0049755	43.225	40.1342	36.0504	39.8032	62.0028	56.9622	56.9618	58.6423	43.7289	46.9854	40.4178	43.7107	39.4132	36.5215	38.2274	38.054	39.7019	42.5516	42.7666	41.6733	33.0551	29.9625	30.5979	31.2052	136.395	140.46	140.379	139.078	156.04	159.8	159.915	158.585	137.359	138.47	143.826	139.885	162.1	165.673	166.129	164.634
EVM0043968	1.10732	1.07628	1.49571	1.22644	1.65974	1.83309	1.70691	1.73325	3.40426	3.66464	3.60181	3.5569	2.45674	2.98552	2.43156	2.62461	3.15603	2.92443	2.38788	2.82278	1.76795	2.50858	1.80521	2.02725	2.61877	2.16598	2.72649	2.50375	7.62943	6.89009	5.66428	6.72793	3.13714	3.29138	3.73689	3.38847	3.26333	3.61349	3.38492	3.42058
EVM0044580	9.44058	7.56011	7.93031	8.31034	2.76192	3.09772	3.41095	3.0902	1.84633	1.8084	1.55471	1.73648	0.712554	0.814492	0.680712	0.735919	2.09955	2.51001	2.81104	2.47353	7.40444	6.57753	6.65265	6.87821	3.4536	4.20218	4.01442	3.89007	4.88195	5.37657	4.60149	4.95333	3.3359	3.00095	2.95405	3.09697	2.91041	3.13936	2.64406	2.89794
EVM0045751	16.185	14.9789	15.4591	15.541	16.056	16.3045	16.2541	16.2049	7.76791	7.57801	7.68724	7.67772	13.6147	13.156	11.7576	12.8427	16.4588	15.6901	15.8891	16.0126	18.4456	17.1221	16.7915	17.4531	18.0989	18.841	17.3018	18.0806	8.62141	8.8389	8.22452	8.56161	19.205	18.5602	18.0045	18.5899	15.3629	16.2468	14.5627	15.3908
EVM0049751	2.29425	2.07071	1.52212	1.96236	0.542149	0.530171	0.504536	0.525619	1.59292	1.40971	1.69715	1.56659	1.05879	0.434802	1.06381	0.852469	1.76904	0.999612	1.44113	1.40326	1.00333	0.605073	0.708936	0.772448	0.298187	0.337892	0.327175	0.321085	0.669139	0.37995	0.421968	0.490352	0.571636	0.85773	0.699899	0.709755	0.749874	0.646291	1.25252	0.882894
EVM0044582	14.446	13.8354	15.4022	14.5612	5.03365	6.89342	6.36922	6.09877	3.83679	4.20859	4.54812	4.19783	7.82176	7.24314	7.77559	7.6135	15.0994	14.9792	14.4092	14.8293	20.0317	18.2651	19.024	19.1069	8.98401	8.92083	7.24878	8.38454	8.68821	8.78247	9.15077	8.87382	16.2629	17.9048	14.9083	16.3587	17.3283	19.9829	16.0996	17.8036
EVM0003058	0.358843	0.419829	0.276156	0.351609	0.30598	0.25763	0.253152	0.272254	0.477435	0.671755	0.697339	0.61551	0.392377	0.68712	0.577783	0.552427	0.39707	0.419993	0.367063	0.394709	0.649115	1.27275	0.924671	0.948845	0.536901	0.697997	0.53098	0.588626	1.0909	0.863285	1.17056	1.04158	0.863112	0.387473	0.73237	0.660985	0.699816	0.66397	0.821679	0.728488
EVM0009705	8.47926	7.70386	8.28389	8.15567	14.7019	13.8561	15.5716	14.7099	8.83287	8.53544	8.72484	8.69772	9.4681	9.73127	8.58622	9.26186	7.91521	8.79821	8.10746	8.27363	4.05475	4.09041	4.14811	4.09776	23.3049	25.3976	24.7051	24.4692	21.4959	21.4142	21.0523	21.3208	18.1363	17.9281	19.9795	18.6813	24.0461	26.7817	25.9171	25.5816
EVM0009706	9.96704	9.61829	9.75988	9.78174	3.50234	3.57937	4.56953	3.88375	4.19324	3.70847	4.23761	4.04644	16.8388	17.1983	16.2161	16.751	17.1072	19.3721	18.1644	18.2146	8.75757	9.30425	8.20112	8.75431	5.37773	5.55928	4.33668	5.09123	5.2055	5.84226	4.87049	5.30608	13.4653	13.6421	15.2005	14.1026	16.4228	17.5992	16.2934	16.7718
EVM0009708	5.16443	6.01975	5.71749	5.63389	15.1017	13.4869	13.9106	14.1664	9.76236	10.2741	11.3056	10.4473	11.9781	11.7282	11.5341	11.7468	7.63161	7.6038	8.89973	8.04505	7.1157	5.78598	6.15335	6.35168	12.6603	13.0814	12.1028	12.6148	12.071	11.8758	13.2309	12.3926	17.7976	19.1423	19.81	18.9166	11.9736	14.1167	12.1254	12.7386
EVM0015267	0.48492	0.451093	0.339663	0.425225	0.239872	0.275613	0.427094	0.314193	0.257011	0.211678	0.593866	0.354185	0.215579	0.314962	0.241435	0.257325	0.253905	0.213745	0.271352	0.246334	0.955549	1.03258	1.2387	1.07561	0.272989	0.770117	0.306808	0.449971	0.599853	0.57101	0.734746	0.635203	0.199359	0.119573	0.355215	0.224716	0.29909	0.398793	0.239403	0.312429
EVM0049612	0.462487	0.551507	0.819299	0.611098	0.449039	0.517951	0.374345	0.447112	0.485413	0.165338	0.565722	0.405491	0.211618	0.512596	0.522041	0.415418	0.507166	0.687217	0.878144	0.690842	0.892959	0.853072	1.08092	0.942317	0.221586	0.067038	0.495614	0.261413	0.804178	0.949352	0.808945	0.854158	0.207315	0.660532	0.386833	0.418227	0.549653	0.973665	0.496941	0.67342
EVM0030482	4.20807	3.87301	5.51245	4.53118	2.39077	3.311	2.73746	2.81308	2.42638	3.34406	2.86094	2.87713	1.12395	1.11815	1.17906	1.14038	2.44418	3.37651	3.8501	3.2236	11.4351	13.3492	8.86985	11.218	4.89627	6.99824	7.01263	6.30238	6.84201	6.31821	4.89871	6.01964	4.04852	3.78532	2.73181	3.52188	4.70578	4.58493	5.44057	4.91043
EVM0030481	0.967309	1.46516	1.41931	1.28393	0.219227	0.234004	0.496108	0.316446	0.202071	0.178869	0.182882	0.187941	0.210707	0.107575	0.31908	0.212454	0.33201	0.387421	0.187803	0.302411	1.56599	0.602673	0.651709	0.940125	0.3432	0.580935	0.514532	0.479556	0.32281	0.309764	0.18045	0.271008	0.123028	0.180453	0.307368	0.203616	0.406142	0.629402	0.693104	0.576216
EVM0030480	1.93951	2.21933	2.03321	2.06402	0.654904	1.0576	1.08953	0.934012	1.50826	0.86898	0.41232	0.929853	0.374117	0.443351	0.450509	0.422659	0.510229	0.172046	0.61898	0.433752	1.18978	1.87593	1.6134	1.5597	0.942677	1.26094	1.11975	1.10779	0.491858	0.922713	1.51472	0.976429	0.538469	0.468673	0.059397	0.355513	0.888406	0.714209	0.60847	0.737028
EVM0030488	19.2637	19.8207	19.1845	19.423	17.9212	21.5714	21.7139	20.4021	12.7018	12.3919	14.1407	13.0781	14.3265	18.1	16.6331	16.3532	18.0705	20.4306	20.975	19.8253	17.8819	17.4262	17.8302	17.7128	25.1053	24.6467	24.5933	24.7817	20.9638	19.7609	21.4242	20.7163	42.731	39.6032	38.8693	40.4012	27.6159	24.0925	26.7629	26.1571
EVM0034905	0	0.186636	0	0.062212	0.761744	0.55612	0.248188	0.522017	0.553037	0.528217	0.48241	0.521221	0.61573	0.48899	0.341892	0.482204	0.379588	0.873951	0.35336	0.535633	0.984844	1.17329	1.82793	1.32869	0.756458	0.43083	0.31613	0.501139	1.15828	1.76112	1.56826	1.49589	1.78219	1.05917	1.62651	1.48929	1.10711	1.00927	1.66353	1.25997
EVM0034901	6.58281	5.47508	7.08139	6.37976	5.54787	4.97149	4.73334	5.08423	16.4376	19.6641	19.3331	18.4783	6.8395	6.16108	5.97446	6.32502	8.40068	8.59803	9.29836	8.76569	6.08726	6.65711	7.21736	6.65391	7.82033	9.55504	8.03392	8.46976	23.1479	18.2259	19.5767	20.3168	7.44339	6.8267	6.70374	6.99128	10.4324	9.85039	11.6934	10.6588
EVM0034908	4.81139	4.31237	5.12135	4.74837	4.99483	3.64344	3.12587	3.92138	3.1992	2.79595	3.56157	3.18557	1.58468	2.0508	2.30924	1.98157	2.22322	2.58904	2.22031	2.34419	4.16216	4.22517	4.428	4.27178	4.16782	3.26762	4.2618	3.89908	4.578	4.3448	3.51725	4.14668	2.72827	2.53138	2.59405	2.6179	3.24275	3.03222	2.65417	2.97638
EVM0018947	2.25645	3.44958	1.34922	2.35175	4.43399	4.01257	5.48074	4.64243	1.0588	2.51932	2.61749	2.0652	0.097342	0.088449	0.132672	0.106154	1.33055	0.480092	1.1207	0.977114	3.69027	4.125	3.50511	3.77346	5.71304	6.32649	6.06319	6.03424	3.8426	3.67207	3.12247	3.54571	1.79605	1.07117	1.41697	1.42806	1.23129	2.31758	1.68659	1.74515
EVM0057089	2.32559	4.07579	3.85458	3.41865	2.20995	3.45154	1.74742	2.46964	1.50311	1.47209	1.54967	1.50829	1.02337	1.3938	1.20118	1.20612	1.93776	1.47053	1.10627	1.50485	2.91724	3.19144	3.14192	3.08353	0.292493	1.20575	1.13637	0.878208	1.18884	1.51926	1.31952	1.34254	1.39215	3.02571	2.12155	2.1798	0	1.69238	2.36506	1.35248
EVM0048055	31.3378	31.9523	32.1291	31.8064	20.626	22.6016	18.6412	20.6229	29.1411	29.7431	28.574	29.1527	49.4171	52.1802	49.9091	50.5021	47.6603	52.0758	52.674	50.8034	30.9758	36.0129	30.8224	32.6037	18.9047	20.9588	20.6365	20.1667	26.943	27.199	27.8355	27.3258	45.8224	46.0998	44.7844	45.5689	41.3999	43.6505	43.5676	42.8726
EVM0048058	0.421026	0.94874	0.882429	0.750732	0.08851	0.280215	0.263378	0.210701	0.788657	0.172847	0.374978	0.445494	0.588296	0.586537	0.567905	0.580913	0	0.106443	0	0.035481	3.59443	3.87364	3.52084	3.66297	0.88511	1.10015	0.746169	0.910475	1.65911	1.09173	1.90208	1.55097	3.5631	3.1718	3.87663	3.53718	0.841185	0.09595	1.55629	0.831142
EVM0015263	4.28061	4.02606	3.72844	4.0117	2.6334	2.43711	3.86877	2.97976	1.32729	1.78953	2.43852	1.85178	0.62721	0.881375	1.48928	0.999288	0.3396	1.02719	0.597348	0.654713	3.33896	2.71977	3.44731	3.16868	1.38052	2.37269	1.97751	1.91024	0.725653	2.60054	1.42077	1.58232	1.35506	1.14637	0.926736	1.14272	1.93188	1.63286	1.74802	1.77092
EVM0040704	43.3281	53.0779	39.1587	45.1882	54.4188	49.543	51.2886	51.7501	73.8625	88.1064	80.9146	80.9612	126.835	108.699	129.116	121.55	129.107	116.284	131.459	125.617	69.25	64.5223	68.2128	67.3284	60.1814	60.9658	65.1877	62.1116	97.4779	72.8683	65.7568	78.701	127.452	139.037	118.012	128.167	80.4315	89.1419	76.8977	82.157
EVM0008075	2.57002	4.83736	3.55821	3.6552	6.30241	7.1547	7.64242	7.03318	5.23841	4.84574	5.59794	5.22736	0.263179	0.515108	0.214806	0.331031	0.676133	1.18043	0.866339	0.907636	0.704856	1.20607	0.965561	0.958829	0.401677	0.153676	0.56278	0.372711	0.491789	0	1.02216	0.504651	0	0.268503	0.243356	0.17062	0.461023	0	0.402167	0.28773
EVM0008074	7.90383	6.78014	7.05953	7.24783	8.95077	6.70443	5.4811	7.04543	2.86968	3.09808	4.36088	3.44288	9.67557	10.0654	10.1616	9.9675	10.7433	13.3696	13.3185	12.4771	9.1711	11.3572	9.66357	10.064	4.71912	5.95831	4.12544	4.93429	3.03945	3.19548	3.55608	3.26367	9.16334	9.77605	9.85161	9.597	9.8921	9.93662	11.3082	10.379
EVM0008076	84.5	79.641	80.4004	81.5138	50.1818	51.4522	49.2698	50.3013	41.6903	39.9195	39.1706	40.2601	116.981	117.816	115.309	116.702	97.5803	94.5832	102.126	98.0965	103.894	94.7136	100.746	99.7842	74.1635	72.3403	64.6061	70.37	44.5468	42.5402	46.4162	44.5011	123.961	133.982	122.52	126.821	106.48	108.152	104.595	106.409
EVM0002616	0.175069	0.343902	0.415878	0.311616	0.183721	0.187031	0.088373	0.153042	0.225718	0.211797	0.214732	0.217416	0.150999	0.154957	0.272805	0.19292	0.505952	0.266638	0.299831	0.357474	0.90349	0.658258	0.673844	0.745197	0.284306	0.142443	0.200826	0.209192	0.330458	0.432795	0.361987	0.37508	0.425632	0.318983	0.532731	0.425782	0.184896	0.360793	0.398026	0.314572
EVM0002615	15.2568	14.5856	16.1271	15.3232	40.8794	45.6843	42.7681	43.1106	30.5629	27.0042	29.4392	29.0021	9.75402	10.2141	10.3278	10.0987	10.6703	9.76858	10.706	10.3816	14.9531	16.419	14.6766	15.3496	48.2357	45.4482	46.9326	46.8722	36.3045	36.4037	35.8699	36.1927	14.2266	14.9534	13.9621	14.3807	11.4423	11.7804	11.2813	11.5013
EVM0052050	0.971068	1.19709	0.98556	1.05124	0.909332	0.823534	0.808474	0.847113	0.487306	0.493235	0.420504	0.467015	1.313	1.22025	1.14973	1.22766	0.958723	1.24497	1.43986	1.21452	1.61339	1.51005	1.41183	1.51176	0.938128	1.02634	1.08697	1.01715	1.31545	0.992819	0.461406	0.923224	2.498	2.62433	2.75955	2.62729	2.55558	2.54817	2.12685	2.4102
EVM0052051	45.7388	47.6583	48.0761	47.1577	21.0272	19.5441	21.3941	20.6551	14.3665	16.116	15.6911	15.3912	13.1616	13.7801	13.4153	13.4523	19.6894	19.5409	20.024	19.7514	40.405	39.431	44.8018	41.546	18.606	20.1737	19.8447	19.5415	13.1827	15.4687	15.5159	14.7224	8.04658	10.6034	10.3198	9.65658	13.0118	13.5281	14.5752	13.705
EVM0052059	3.61411	3.66987	3.86232	3.71543	1.69371	1.67093	2.2093	1.85798	5.8888	5.4258	5.14952	5.48804	10.4065	8.87791	8.14281	9.14242	15.0538	14.168	14.5035	14.5751	4.81807	6.51708	6.36048	5.89854	2.02424	1.74638	2.05613	1.94225	6.03345	6.74191	5.62906	6.13481	5.93902	7.27339	6.9373	6.71657	10.4148	10.1427	11.3128	10.6234
EVM0002619	6.93888	6.06477	6.33636	6.44667	6.81744	6.94743	6.56145	6.77544	13.7767	12.9139	11.1686	12.6197	16.2108	14.2795	16.1401	15.5435	11.3735	14.7026	12.4815	12.8526	8.29195	8.61893	6.99288	7.96792	7.389	8.49797	6.78841	7.55846	10.351	9.08856	7.53356	8.99106	11.0701	11.6509	10.9388	11.2199	12.2841	12.1436	10.9353	11.7877
EVM0042706	1.62492	1.08364	2.14204	1.61686	1.09238	0.82672	1.00853	0.975878	0.472269	0.171977	0.704115	0.449454	1.28524	1.50401	1.63534	1.47486	0.946129	0.391727	0.995395	0.77775	1.47151	1.62525	1.19709	1.43128	1.16061	0.73848	0.720931	0.873339	1.27579	0.994979	1.43805	1.23627	2.77428	2.49867	2.72219	2.66505	1.20256	1.73512	0.937155	1.29161
EVM0042701	3.75475	3.22746	3.30121	3.42781	2.88989	2.97513	3.19249	3.01917	5.07324	7.78351	5.16847	6.00841	6.3202	6.74246	9.37423	7.47896	7.7129	9.54074	8.35812	8.53725	4.58671	3.7577	7.21565	5.18669	2.02347	3.18532	2.32817	2.51232	3.53438	6.35044	5.59805	5.16096	6.63615	5.15966	6.76526	6.18702	5.44888	5.42122	5.90403	5.59138
EVM0042700	1.20333	3.13648	1.42696	1.92226	3.68797	5.15064	4.08218	4.30693	2.98061	2.34741	2.63633	2.65479	4.89755	5.03919	4.96869	4.96848	6.62159	5.88746	8.29531	6.93479	3.1869	2.63404	2.68009	2.83368	5.28179	4.70622	5.51746	5.16849	4.54476	4.92329	4.55081	4.67295	5.28213	7.50913	6.44814	6.41314	3.95778	5.49187	4.96819	4.80595
EVM0042703	3.38963	3.3511	3.41369	3.38481	2.33836	3.30894	2.56846	2.73858	2.85841	2.247	2.42635	2.51059	1.30295	1.11679	1.5692	1.32965	1.51685	1.26911	1.3074	1.36445	3.17317	3.82313	2.48249	3.1596	2.56763	2.62231	2.49134	2.56043	2.76426	2.81838	2.78775	2.79013	1.07379	1.49972	1.42029	1.33127	1.4999	1.42342	1.50134	1.47489
EVM0006263	0.995403	1.62722	1.28281	1.30181	0.634503	0.767033	0.841078	0.747538	1.39524	1.23237	1.59602	1.40787	1.2553	1.28718	1.19758	1.24669	0.493531	0.900149	1.3853	0.926327	1.89372	2.31728	2.32449	2.1785	2.28877	1.94001	1.91136	2.04671	2.34831	2.15377	2.17229	2.22479	1.74581	1.78298	2.37705	1.96862	2.2574	2.34411	2.23119	2.27757
EVM0042709	0.801377	0.933596	0.756965	0.830646	0.901066	0.858976	0.820481	0.860174	0.861944	0.966201	0.77233	0.866825	0.303282	0.147675	0.540523	0.330493	0.795278	0.515389	0.407635	0.572767	1.17979	1.16181	0.839671	1.06042	0.835331	0.730959	0.626302	0.730864	1.04617	1.33699	1.26764	1.21693	0.633893	0.587827	0.417835	0.546518	0.550138	0.639839	0.566437	0.585471
EVM0006264	8.52589	5.55807	6.76136	6.94844	4.90024	5.69264	5.69903	5.43064	2.51048	2.13202	2.25596	2.29949	2.08887	1.84958	1.71477	1.88441	1.84558	2.37677	2.16555	2.1293	3.84939	3.17998	3.69779	3.57572	19.3343	17.5932	17.4909	18.1395	7.84508	9.82367	7.49322	8.38732	11.9275	10.7179	9.80233	10.8159	8.8827	9.09301	7.32902	8.43491
EVM0047285	3.38025	3.50259	3.36408	3.41564	1.55067	1.38382	1.40826	1.44758	1.27239	1.35334	1.64401	1.42325	45.3419	43.6764	45.6337	44.884	32.3479	33.7882	37.8478	34.6613	2.48539	3.20879	2.62087	2.77168	2.63577	3.39046	2.97054	2.99892	1.66332	2.04628	1.74737	1.81899	32.7027	33.5869	34.1353	33.475	25.6193	26.2275	25.3361	25.7276
EVM0047284	4.57911	3.90272	3.94437	4.14207	6.3727	5.83009	5.51285	5.90521	13.0654	10.6127	12.072	11.9167	18.3666	18.9132	17.8932	18.391	16.2438	16.5826	16.0115	16.2793	5.00169	5.52719	4.76695	5.09861	3.56044	3.71121	4.51496	3.92887	7.24095	7.28838	6.41266	6.98066	8.58381	7.71791	10.2096	8.83712	10.6	10.4218	12.3516	11.1245
Salix_babylonica_newGene_2595	2.08064	2.51893	1.91083	2.17013	0.922633	1.02214	1.37389	1.10622	1.14114	1.57274	1.11033	1.27474	1.91756	1.21162	0.872645	1.33394	1.93044	1.01242	2.23282	1.72523	3.72651	3.36526	4.06806	3.71994	2.71382	1.87408	2.29831	2.2954	0.925246	1.49307	2.35458	1.59097	2.10543	2.82187	2.23166	2.38632	3.1861	2.98534	3.86206	3.3445
Salix_babylonica_newGene_2596	4.03043	3.84945	4.5315	4.13713	33.596	35.4562	34.4012	34.4845	16.8139	16.1342	18.1742	17.0408	6.07601	6.69794	6.92859	6.56751	3.19567	3.73542	2.65811	3.1964	4.68295	4.34801	4.79745	4.60947	17.7217	18.8882	17.0141	17.8746	11.8223	10.3267	12.0241	11.391	5.627	4.57586	4.98911	5.06399	2.59605	2.36182	2.48098	2.47962
Salix_babylonica_newGene_2599	7.35093	9.55705	6.76887	7.89228	29.7389	27.6384	26.6076	27.995	42.885	40.7374	43.2127	42.2784	87.6472	85.1019	80.2858	84.3449	68.5497	79.37	79.5573	75.8257	2.07633	1.39256	1.50649	1.65846	3.15972	4.76452	2.81584	3.58002	4.95989	5.75451	5.49902	5.40447	11.5373	6.45469	9.07801	9.02334	6.27914	5.55958	6.53515	6.12462
EVM0056043	1.77266	0.961497	1.32954	1.35456	1.56023	1.26528	1.06744	1.29765	2.56429	2.46134	1.79815	2.27459	0.989131	1.07336	1.30906	1.12385	1.22783	0.976034	1.01131	1.07173	1.29573	1.02744	1.10677	1.14331	1.30244	0.880466	0.834182	1.00569	2.21658	1.93081	2.21976	2.12238	0.88033	1.27238	1.11347	1.08873	1.27061	0.885685	0.922641	1.02631
Salix_babylonica_newGene_10923	58.8329	59.6455	66.022	61.5001	42.29	39.0215	45.2342	42.1819	33.9377	35.7174	35.2375	34.9642	13.1417	12.9515	15.0445	13.7125	18.5222	17.7708	18.462	18.2517	24.9149	27.5852	29.1889	27.2296	13.8803	13.5467	15.0041	14.1437	11.0003	12.8597	13.2216	12.3605	6.76807	8.89714	8.38307	8.01609	10.5633	10.6856	12.1875	11.1455
EVM0005347	10.7825	9.35692	11.3882	10.5092	8.17275	6.89594	7.71297	7.59389	8.52329	9.67773	9.41924	9.20675	5.3064	4.9982	5.08758	5.13073	5.13746	5.07038	4.22415	4.81066	9.20454	8.94404	8.72191	8.95683	6.31531	6.90638	5.84668	6.35612	8.58211	9.54663	7.96113	8.69662	4.44761	5.02882	4.97466	4.81703	5.44758	5.90775	4.97224	5.44252
EVM0057261	20.7074	18.3193	18.8806	19.3024	24.812	24.0683	26.0021	24.9608	21.693	21.1996	19.032	20.6415	9.59728	10.9016	10.2006	10.2332	11.2491	11.1281	10.5914	10.9895	7.014	7.00545	6.6962	6.90522	4.60551	4.27647	5.18648	4.68949	4.69447	5.54418	5.58062	5.27309	4.32448	2.35694	4.80179	3.82774	4.98804	6.45038	4.94672	5.46171
EVM0005342	25.3027	25.7632	24.7809	25.2823	24.827	26.8649	26.2982	25.9967	19.3915	17.9928	18.1278	18.504	17.1654	17.1057	17.7413	17.3374	18.9303	21.7379	19.6464	20.1049	14.8441	15.2904	15.539	15.2245	12.9225	14.0764	13.2182	13.4057	9.08259	10.3428	10.7379	10.0544	8.39039	9.45983	10.5413	9.46384	9.54517	8.9791	9.4276	9.31729
EVM0005349	16.4929	17.0096	15.5593	16.3539	13.0143	15.6716	14.0514	14.2457	5.2966	6.31855	5.35933	5.65816	9.96772	6.61986	6.35993	7.64917	6.488	5.52012	6.44036	6.14949	4.08639	4.42467	5.4995	4.67019	18.4154	19.0958	20.182	19.2311	4.48341	2.91382	3.39	3.59574	6.41118	6.89147	5.62648	6.30971	6.18839	4.76171	6.10704	5.68571
EVM0004474	18.2176	18.5451	18.8175	18.5268	28.8421	27.4696	31.8374	29.3831	47.795	47.4941	51.8495	49.0462	30.1926	26.3372	28.3286	28.2862	30.841	30.1688	23.2998	28.1032	14.7616	12.8141	18.9228	15.4995	16.5536	19.2483	18.2645	18.0221	23.1349	18.5648	19.3062	20.3353	13.0281	14.0765	16.7401	14.6149	14.8022	12.3415	16.0841	14.4093
Salix_babylonica_newGene_3026	0.526334	0.453368	0.210463	0.396722	0.104381	0.176052	0.408252	0.229562	0.496948	0.332569	0.170709	0.333409	0.327813	0.556093	0.307944	0.397283	0.414983	0.522879	0.24349	0.393784	13.9921	15.4663	13.8774	14.4453	11.9268	16.2437	14.5771	14.2492	11.64	13.4443	12.8074	12.6306	12.8462	10.3424	10.5331	11.2405	12.4901	13.5105	10.9041	12.3016
EVM0033266	3.08116	3.26542	3.2506	3.19906	1.43021	2.16685	2.1657	1.92092	1.55311	1.84846	1.36066	1.58741	1.1816	2.06522	1.44458	1.5638	1.77279	1.83637	1.87819	1.82912	2.83712	2.369	2.55038	2.5855	2.01385	1.66059	2.15319	1.94254	1.61247	1.80867	1.38068	1.60061	1.22986	0.876301	0.826963	0.977709	1.52103	1.46603	1.80575	1.5976
EVM0041002	41.3116	42.782	44.4031	42.8322	244.691	233.057	235.576	237.775	54.0335	57.2124	58.3537	56.5332	35.4895	38.2863	38.5465	37.4407	40.3675	41.6452	46.9396	42.9841	110.671	101.234	111.359	107.755	186.541	194.175	202.779	194.499	43.6428	48.5806	49.9459	47.3898	41.3614	43.0718	48.0332	44.1555	39.8825	41.8759	41.2084	40.9889
Salix_babylonica_newGene_8144	0.715639	0.307761	0.557208	0.526869	0.56911	0.690343	0.809531	0.689661	1.74324	1.40487	1.14307	1.43039	1.03557	1.21201	1.29146	1.17968	0.94029	0.628395	1.04947	0.872717	0.596599	0.354714	0.607897	0.519737	0.592181	0.811175	0.619934	0.67443	1.00049	1.16201	1.31995	1.16082	0.827522	1.13133	1.21486	1.0579	0.862879	1.11124	1.07805	1.01739
EVM0053016	2.28729	2.48688	2.11228	2.29548	4.15399	4.50364	3.85157	4.16973	2.23307	2.35265	1.76476	2.11683	1.35345	1.90892	1.96399	1.74212	1.58621	2.12277	1.93732	1.8821	10.5321	9.02174	9.81792	9.79057	7.30818	7.18272	6.23417	6.90836	7.52631	7.56945	8.22215	7.77264	4.94791	5.34398	5.96006	5.41732	5.19649	6.13718	5.64789	5.66052
EVM0053014	0.652431	0.485035	0.507463	0.54831	1.55421	2.63665	2.51615	2.23567	0.47159	0.428012	0.613891	0.504498	0.68895	0.721507	0.844443	0.751633	0.239247	0.560134	0.130208	0.309863	0.555325	0.313792	0.318989	0.396035	1.1418	1.2258	1.37279	1.2468	0.230313	0.299807	0.135677	0.221932	1.7666	1.14171	0.601949	1.17009	0.712392	0.602257	1.2099	0.841516
EVM0053010	28.0592	32.2092	26.4338	28.9007	12.6595	12.7502	12.2414	12.5504	4.77658	6.56156	5.47811	5.60542	1.72792	1.36498	1.39787	1.49692	2.36695	4.12825	4.80881	3.768	16.8493	16.5273	15.0962	16.1576	18.2928	21.9348	18.639	19.6222	14.7225	15.7952	15.2966	15.2714	6.53495	6.17093	4.90724	5.87104	5.95642	8.95699	6.14518	7.01953
EVM0047867	0.59422	0.428844	0.428572	0.483879	0.061346	0.227017	0.182482	0.156948	0.147443	0.287015	0.474451	0.30297	0.497621	0.439222	0.407879	0.448241	0.879661	1.04684	0.610686	0.845728	0.19341	0.197297	0.101464	0.164057	0.090648	0.023027	0	0.0378917	0.259784	0.428951	0.310565	0.3331	0.192062	0.217292	0.308717	0.239357	0.383007	0.455754	0.508417	0.449059
EVM0047869	17.3776	15.4466	18.5272	17.1172	9.68862	10.7434	11.4606	10.6309	30.3425	27.3622	28.8009	28.8352	43.1254	40.3604	46.6184	43.3681	25.7779	23.2929	21.295	23.4553	7.35061	7.65012	6.0008	7.00051	2.0171	2.13041	1.92587	2.02446	2.0955	1.80188	1.88851	1.92863	3.02751	3.63962	3.4836	3.38357	2.97883	3.07984	3.03364	3.03077
Salix_babylonica_newGene_9813	1.26594	1.30673	0.827335	1.13333	0.540734	0.716545	0.550601	0.602627	0.332912	0.469234	0.090682	0.297609	0.156669	0.419275	0.500317	0.358754	0.60743	0.470716	0.443726	0.507291	0	0.137306	0.23708	0.124795	0.068598	0.176797	0.099864	0.115086	0	0	0	0	0	0.076601	0	0.0255337	0.105531	0.198138	0.054938	0.119536
EVM0001992	1.89541	1.2899	2.15966	1.78166	1.13948	1.47179	1.03885	1.21671	1.56662	0.972846	1.18013	1.23986	0.28135	0.685112	0.258673	0.408378	0.280423	0.305817	0.20078	0.26234	0.729776	0.689833	0.96321	0.794273	0.476519	0.661757	0.755587	0.631288	0.409619	0.695147	0.332949	0.479238	0.070977	0	0.261933	0.11097	0.046266	0.229483	0.096503	0.124084
EVM0052964	4.13077	3.78974	5.46237	4.46096	4.70741	5.70808	5.88585	5.43378	2.16844	2.89059	3.14938	2.73614	2.89915	2.01598	2.02895	2.31469	1.83539	1.65488	1.80256	1.76428	0.143934	0.082286	0.544625	0.256948	1.13343	0.904609	1.16838	1.06881	0.624139	0.08517	0.592837	0.434049	0.765471	0.840252	0.559771	0.721831	0.451382	0.412779	0.724448	0.529536
Salix_babylonica_newGene_1432	30.7952	32.2836	25.2779	29.4522	18.5163	23.539	22.2891	21.4481	35.3266	30.1327	31.7318	32.397	46.1492	52.6369	57.4692	52.0851	24.9694	32.0414	27.3178	28.1095	21.7096	19.4531	20.086	20.4162	13.4181	13.1902	10.92	12.5094	18.3911	18.524	20.1562	19.0237	23.2396	21.479	23.0966	22.6051	13.8284	12.2337	13.4633	13.1751
EVM0054473	1.03144	1.22124	1.55727	1.26998	1.25805	1.38948	1.91574	1.52109	2.20104	1.96179	1.86402	2.00895	0.742673	0.821315	0.962154	0.842047	0.825966	1.07378	0.678081	0.859277	1.32035	1.4267	1.25482	1.33396	1.4284	1.77514	1.08177	1.42844	2.66548	2.88718	2.24134	2.598	0.78986	1.12648	1.25607	1.05747	1.19303	1.07351	0.963963	1.07683
EVM0041424	1.30021	1.59045	1.17881	1.35649	0.881795	0.726974	0.886934	0.831901	0.593177	0.615815	0.82629	0.678427	0.26272	0.448868	0.131466	0.281018	0.658965	0.564524	0.481359	0.568283	1.00533	1.0602	0.98134	1.01562	0.448099	0.301183	0.331044	0.360109	0.685227	0.649915	0.526241	0.620461	0.222073	0.266952	0.12494	0.204655	0.470916	0.266927	0.441593	0.393145
Salix_babylonica_newGene_8490	4.86999	3.14072	2.80366	3.60479	3.09507	4.75092	4.65739	4.16779	3.82655	4.93812	3.81761	4.19409	3.9893	4.08322	5.29829	4.45694	2.17881	3.19247	2.29655	2.55594	3.37433	3.21241	1.38012	2.65562	4.14516	3.04438	4.7419	3.97715	2.66773	2.01746	1.31789	2.00103	3.69303	3.78008	3.51313	3.66208	3.27257	3.48521	1.77306	2.84362
EVM0041429	8.30917	7.15381	8.65127	8.03808	11.8018	12.1087	13.1013	12.3373	16.0113	15.2654	15.7365	15.6711	19.5905	20.3698	19.6656	19.8753	19.2745	18.6397	18.2861	18.7334	9.95599	11.0239	10.5997	10.5265	11.5488	12.5408	13.354	12.4812	18.9078	18.3306	17.0833	18.1072	14.2844	16.6935	15.2285	15.4021	17.9602	18.4209	17.9337	18.1049
EVM0041428	3.41263	9.23557	4.38784	5.67868	3.89447	3.78916	5.39998	4.3612	2.8054	1.73835	2.89261	2.47879	2.39727	2.26371	1.56243	2.07447	1.26649	2.04407	2.19726	1.83594	1.82229	3.89861	3.45769	3.05953	2.87921	6.33879	4.94183	4.71994	2.2498	3.38237	4.23351	3.28856	2.865	2.58526	2.40522	2.61849	1.81727	3.00036	2.4891	2.43558
EVM0027324	0.601454	0.480124	0.639166	0.573581	1.70444	1.78218	2.30252	1.92972	0.4921	0.521979	0.794639	0.602906	0.153191	0.166603	0.147501	0.155765	0.08364	0.083432	0.245996	0.137689	0.529941	0.996738	0.536554	0.687744	0.863549	0.349855	0.40405	0.539151	0.05276	0.045527	0.053706	0.0506643	0.142635	0.09296	0	0.0785317	0.075245	0.107577	0	0.0609407
EVM0054795	5.01696	6.41224	4.87956	5.43626	10.5642	13.1257	13.695	12.4616	15.3975	16.9596	16.0875	16.1482	14.8673	18.1586	14.5493	15.8584	15.4378	18.9072	19.4632	17.9361	11.9502	10.9319	11.4666	11.4496	12.2503	13.9435	15.5402	13.9113	21.3542	16.1706	19.9578	19.1609	18.288	10.8128	14.5759	14.5589	15.1177	12.8805	16.4766	14.8249
EVM0054796	2.70394	2.57053	2.72591	2.66679	2.98322	2.85514	2.17476	2.67104	1.89435	2.08362	1.72805	1.90201	1.14537	0.707426	1.0655	0.972764	1.73532	1.84917	2.11782	1.90077	3.89428	3.96748	4.05838	3.97338	2.53992	3.11153	2.82704	2.82616	3.14133	3.19214	2.2387	2.85739	2.12812	1.89276	1.52861	1.84983	2.72394	2.97342	2.3999	2.69908
EVM0054791	5.41962	4.38772	4.82783	4.87839	3.23483	2.87126	3.01986	3.04198	2.13585	2.09247	1.98286	2.07039	1.6843	1.78988	1.65873	1.71097	2.40967	2.92939	2.60906	2.64937	4.80968	4.39386	4.57264	4.59206	2.83361	2.66367	3.24452	2.91393	2.8838	2.6353	3.21181	2.91031	2.19515	2.50203	2.01281	2.23666	2.20809	2.66209	2.98377	2.61798
EVM0054793	2.7141	2.04423	2.44122	2.39985	1.09129	2.20528	2.49939	1.93199	2.25493	1.82885	2.79962	2.29447	2.07528	2.02163	1.71671	1.93787	2.5392	1.74525	1.57505	1.95317	2.57539	3.21543	2.44706	2.74596	2.8908	2.55582	2.61209	2.68624	2.40231	2.14692	1.23897	1.9294	1.36269	1.22386	0.741349	1.1093	2.23923	2.98018	2.49892	2.57278
EVM0054799	4.20695	3.82206	4.38868	4.13923	8.39593	7.60795	8.46199	8.15529	16.232	18.4077	17.0206	17.2201	18.5988	14.8983	14.4447	15.9806	9.42173	9.14289	8.03334	8.86599	2.79804	2.41595	2.46212	2.55871	5.05396	4.02086	4.58218	4.55234	5.20571	5.68605	5.62062	5.50412	9.4304	8.87672	9.78022	9.36244	8.2206	8.02064	9.69739	8.64621
EVM0016978	30.8241	32.82	34.21	32.618	60.5892	56.1903	57.6569	58.1455	48.583	62.7814	53.1022	54.8222	23.4309	26.5304	22.5793	24.1802	37.3695	38.0387	40.7939	38.734	35.142	34.6539	33.717	34.5043	57.4622	59.0852	61.8063	59.4512	77.1463	78.2666	77.6104	77.6744	31.838	32.2499	35.0945	33.0608	31.5724	31.211	27.4272	30.0702
Salix_babylonica_newGene_1438	1.51501	2.59884	1.57685	1.8969	13.6995	9.77558	11.9365	11.8039	7.05678	6.87961	9.9704	7.96893	8.13409	9.69464	8.03348	8.62074	1.54026	2.69226	1.99231	2.07494	1.03881	1.01623	0.960178	1.00507	1.9908	2.10289	2.1833	2.09233	0.93556	0.653268	0.945557	0.844795	1.47488	0.383765	1.04189	0.966846	0.122148	0.225001	0.281761	0.209637
EVM0000099	28.5082	27.4199	26.968	27.632	39.3864	38.2403	41.4271	39.6846	65.4768	63.0019	65.3837	64.6208	68.9285	65.8001	67.8248	67.5178	54.0891	56.5842	55.8097	55.4943	24.9929	22.9975	23.4117	23.8007	31.1538	31.3659	29.9178	30.8125	39.752	37.7777	37.7114	38.4137	38.3989	39.0954	41.2804	39.5916	36.4675	39.4739	34.3983	36.7799
EVM0010404	4.6958	4.69523	4.0182	4.46974	5.50288	5.8136	6.45352	5.92333	4.2235	3.61078	4.49849	4.11092	3.76788	1.72802	2.91018	2.80203	3.40504	3.911	3.40268	3.57291	3.10191	2.81316	2.95667	2.95725	5.76139	8.39128	7.48985	7.21418	4.66614	4.43415	5.69078	4.93036	2.8258	2.79721	2.44408	2.68903	4.37241	4.16478	3.60772	4.0483
EVM0016971	0.066816	0.206843	0.233221	0.16896	1.63519	1.71792	0.91974	1.42428	0.378328	1.4176	0.675967	0.823965	0	0.465408	0.108515	0.191308	0.360591	0.343556	0.254114	0.31942	1.34966	1.31858	0	0.889415	2.53707	2.13759	0.951555	1.87541	0.782314	0.636169	0.818838	0.745774	4.80688	3.26488	5.08719	4.38632	2.26654	2.93579	2.85341	2.68525
Salix_babylonica_newGene_1439	0.956638	1.76618	0.680288	1.13437	10.9326	13.6877	10.5589	11.7264	4.55815	4.89174	5.84193	5.09727	3.54838	3.90043	3.86936	3.77272	0.47929	0.587484	1.06339	0.710055	4.7849	7.24911	6.83568	6.2899	16.2721	14.3469	14.9102	15.1764	5.71877	6.66762	6.29892	6.22844	19.4728	11.7993	14.9965	15.4229	3.71038	4.30838	2.89124	3.63667
EVM0010407	4.32578	4.91713	4.65058	4.63116	3.71533	3.61442	4.29473	3.87483	5.72914	5.41532	5.65368	5.59938	7.36389	8.26654	8.38713	8.00585	6.68156	6.52604	7.52779	6.9118	5.50041	4.87722	5.92017	5.4326	5.51219	4.07136	4.84244	4.80867	6.62746	6.34011	7.80279	6.92345	6.62753	6.24866	7.38622	6.75414	6.26357	5.95069	5.5275	5.91392
EVM0001339	10.4792	10.5365	13.0132	11.343	26.9042	25.7135	24.8931	25.8369	13.2842	14.0202	12.4977	13.2674	9.40089	9.24303	10.1039	9.58259	12.2218	13.4378	12.3232	12.661	10.5318	11.4787	10.776	10.9288	25.2932	29.4213	30.1811	28.2985	15.2038	17.6698	16.6633	16.5123	13.5398	14.1125	16.2364	14.6296	14.957	15.1446	13.4728	14.5248
EVM0001338	1.75586	2.3332	1.78557	1.95821	2.35184	1.54855	2.53897	2.14645	1.65655	2.48815	2.51692	2.22054	1.02955	1.40215	1.05095	1.16088	1.09795	0.699952	0.661239	0.819714	2.97948	2.34521	1.82498	2.38322	1.38798	1.7464	2.01882	1.71773	1.98536	2.54531	2.51722	2.3493	1.72526	1.22298	0.992073	1.31344	2.15839	2.5682	2.03828	2.25496
EVM0000098	4.17986	3.30593	3.67711	3.72097	3.58101	3.23534	3.08884	3.30173	4.81099	4.27389	6.02496	5.03661	8.07327	8.23819	7.67654	7.996	4.88836	5.19213	5.15919	5.07989	1.11419	1.12497	1.18036	1.13984	0.532127	0.234918	0.083359	0.283468	1.22699	0.967675	0.579187	0.924617	1.10008	0.949954	0.57224	0.87409	0.549156	1.14885	1.09228	0.930096
EVM0010403	1.18076	0.808953	1.03688	1.00886	0.874805	0.588662	0.433392	0.632286	0.773691	0.378612	1.22381	0.792036	1.21674	1.284	1.06917	1.18997	1.7728	1.84885	1.10884	1.57683	1.81387	1.36944	1.75417	1.64583	0.753751	1.12134	0.687974	0.854355	0.685446	0.911891	0.811134	0.802824	1.10353	1.19964	1.25935	1.18751	1.43098	1.38881	1.41873	1.41284
EVM0054249	35.481	37.9757	35.5082	36.3217	29.5879	29.1501	29.0482	29.2621	39.1754	44.459	45.724	43.1195	31.2667	30.502	34.2652	32.0113	18.0278	17.1222	22.1473	19.0991	73.823	78.8148	83.7372	78.7917	73.6426	81.7884	78.7556	78.0622	81.9466	88.0702	92.6086	87.5418	39.785	38.2984	44.5874	40.8903	38.899	37.9313	44.6274	40.4859
EVM0004125	0.637869	0.770264	0.35317	0.587101	1.78777	1.15045	1.40388	1.44737	1.2013	1.17466	1.18438	1.18678	0.181244	0.043528	0.144405	0.123059	0.372807	0.325968	0.418774	0.372516	2.24825	2.22651	2.96389	2.47955	2.23234	1.91226	1.47937	1.87466	0.456038	0.665026	1.41956	0.846874	1.13916	1.30463	0.866461	1.10342	1.60676	1.36269	1.07149	1.34698
EVM0004123	3.5423	3.80996	3.67561	3.67596	3.68999	3.85388	3.44756	3.66381	3.18168	3.47837	3.75081	3.47029	2.52144	2.90901	2.95364	2.7947	3.34386	2.99755	3.46076	3.26739	1.64241	2.38203	1.69655	1.907	2.34931	2.15032	1.73056	2.07673	2.4399	2.54543	2.18278	2.38937	1.26369	1.34671	1.23273	1.28104	1.11921	1.09379	1.21009	1.14103
EVM0004120	0.177981	0.090936	0.056291	0.108403	1.02987	1.17325	1.33227	1.17846	0.275549	0.365782	0.518654	0.386662	0.15184	0.107559	0.132475	0.130625	0.183204	0.363787	0.242258	0.263083	0.23909	0.195393	0.230537	0.221673	0.191677	0.121386	0.28082	0.197961	0.145205	0.058866	0.156937	0.120336	0.030829	0.068878	0.059367	0.0530247	0.125244	0.113638	0.049436	0.096106
EVM0002972	8.63131	7.63054	6.68074	7.64753	3.73854	3.70956	4.04219	3.8301	3.44895	4.41197	4.65531	4.17208	4.75984	3.92475	4.16083	4.28181	6.59717	6.82924	6.45842	6.62827	7.61262	8.52092	6.75457	7.62937	3.36956	3.13435	3.14924	3.21772	4.27154	4.69289	5.87577	4.94674	5.99021	5.38144	5.17683	5.51616	6.59249	6.81833	5.4638	6.29154
EVM0002973	1.94137	1.97442	2.43506	2.11695	2.19811	2.05831	1.70603	1.98749	2.24557	2.39372	1.99849	2.21259	1.13321	1.73399	1.16759	1.34493	1.7226	2.17872	1.15238	1.68456	1.62804	1.9519	1.9777	1.85255	2.38699	2.84211	2.21105	2.48005	3.27573	3.87447	3.50512	3.55177	1.2934	1.49893	1.0512	1.28118	1.19065	1.71249	1.77341	1.55885
EVM0002976	0.398837	0.547105	0.471946	0.472629	0.742127	0.342692	0.553908	0.546242	0.845527	0.139537	0.681416	0.555493	0.184065	0.168516	0.795353	0.382645	0.519388	0.576488	0.772345	0.62274	0.328473	0.064883	0.239938	0.211098	0.301696	0.252707	0.182535	0.245646	0.278724	0.303955	0.790405	0.457695	0.492217	0.212288	0.194974	0.299826	0	0.119959	0.07212	0.0640263
EVM0002978	4.59302	4.3619	4.17585	4.37692	3.38476	2.65508	2.99625	3.01203	2.19879	2.51203	2.58308	2.4313	1.60713	1.27218	1.69611	1.52514	2.55374	2.7602	2.13184	2.48193	4.84129	5.01085	3.82832	4.56015	2.36047	2.08904	2.23218	2.22723	2.8995	2.98703	2.92475	2.93709	2.02234	1.79601	1.66107	1.82647	2.26409	2.0176	2.49703	2.25957
EVM0002979	1.55712	1.39473	1.72655	1.55947	1.73449	1.71062	1.57373	1.67295	2.92428	2.10379	2.49808	2.50872	1.99942	2.29919	1.7492	2.01593	1.62662	1.16644	1.29356	1.36221	3.02278	3.0685	2.94353	3.0116	2.91237	2.84374	1.97558	2.57723	3.6342	3.6543	3.71661	3.66837	2.20019	1.7968	2.41708	2.13802	3.08049	2.91872	2.74465	2.91462
EVM0015375	0.534948	0.807935	0.69394	0.678941	0.671848	1.30056	0.481117	0.817841	1.18794	1.451	1.2476	1.29551	0.104068	0.240153	0.07195	0.138724	0.372062	0.612215	0.571748	0.518675	0.299191	0.422954	1.06171	0.594618	1.23181	1.05608	1.58232	1.29007	1.36757	1.74476	1.11981	1.41072	0.925696	0.328232	0.559565	0.604498	0.473752	0.848709	0.521679	0.614713
EVM0042055	12.3946	13.2897	10.9244	12.2029	15.9974	15.3571	13.9607	15.1051	12.1529	13.3592	11.3647	12.2923	8.8889	10.224	8.3378	9.15022	7.21153	5.61145	6.9461	6.58969	6.82463	7.43924	6.56586	6.94324	15.5867	18.0696	18.1597	17.272	9.99418	10.4223	8.22805	9.54818	8.26149	9.34904	8.97167	8.86073	7.37305	7.88879	5.09055	6.78413
EVM0032574	23.3974	22.9515	24.8894	23.7461	15.0847	12.2926	11.7364	13.0379	38.1764	45.9651	40.4683	41.5366	55.6376	50.4971	52.8325	52.9891	7.501	5.65347	4.43422	5.8629	64.055	65.5618	63.6831	64.4333	28.7823	25.4607	24.6175	26.2868	30.4175	28.0918	32.6413	30.3835	57.9124	62.0734	57.5202	59.1687	24.02	21.2193	21.8255	22.3549
EVM0042057	3.29969	3.54308	3.02353	3.28876	3.2947	3.32568	3.41558	3.34532	4.5372	4.59447	4.77367	4.63511	1.15588	1.84533	1.93189	1.64437	3.13245	2.51834	2.25832	2.63637	3.74072	3.44688	3.39363	3.52708	3.10941	3.71521	3.25001	3.35821	7.06128	5.465	6.16927	6.23185	3.19586	2.84075	3.06769	3.03477	3.21028	2.83485	2.77772	2.94095
EVM0015373	1.5816	2.13768	2.59506	2.10478	0.775465	0.556445	1.03066	0.787522	2.26844	2.70237	2.33442	2.43507	37.8703	38.0565	36.43	37.4523	13.1918	11.6865	13.2831	12.7205	1.7304	1.46689	1.503	1.56676	0.500701	0.491725	0.660169	0.550865	0.435669	0.421242	0.106412	0.321108	13.4027	14.1591	14.3216	13.9611	9.25739	9.43901	11.0059	9.90077
EVM0049653	9.49427	15.6383	7.16903	10.7672	8.04869	8.22611	3.67901	6.65127	5.33074	6.54838	5.63702	5.83871	4.35987	3.65373	3.50688	3.84016	3.43286	5.25004	5.09418	4.59236	12.6478	8.38962	10.2915	10.443	8.20833	8.52217	8.66095	8.46381	7.29964	6.34501	7.42949	7.02471	9.50661	5.6292	6.0838	7.0732	7.43613	4.47627	5.03854	5.65031
EVM0032570	12.4567	13.2663	12.3643	12.6958	8.82246	8.33211	7.74761	8.30072	8.12707	6.98732	7.89712	7.67051	7.85209	7.83074	8.08125	7.92136	6.33375	6.78411	6.44525	6.52104	9.08948	8.25519	8.01574	8.45347	15.4753	15.8647	15.7809	15.707	5.41528	5.6246	5.46202	5.50063	8.09609	9.07922	8.13974	8.43835	9.85187	11.0789	9.90293	10.2779
EVM0040668	5.36737	6.29933	6.93352	6.20007	4.79994	3.82538	3.3758	4.00037	3.76936	2.5623	2.91226	3.0813	2.29769	3.04414	2.66397	2.6686	3.08544	3.35739	3.85607	3.43297	6.25988	4.6844	4.7236	5.22263	4.19182	3.37448	5.16824	4.24485	3.06057	2.42842	3.5776	3.0222	3.54334	3.82268	2.8968	3.42094	3.65845	3.13584	3.09843	3.29757
EVM0037315	1.305	0.367975	0.86977	0.847581	2.21299	1.13179	1.52667	1.62382	0.892519	0.56365	1.26591	0.90736	1.66696	0.854333	1.98284	1.50138	1.79799	2.65877	1.57933	2.01203	1.10881	1.29156	1.09823	1.1662	0.649533	1.22715	1.0755	0.984063	0.870637	0.65906	0.530249	0.686649	1.36911	1.27168	1.75208	1.46429	0.917477	1.64175	1.29473	1.28465
EVM0032573	1.44146	1.56724	1.3646	1.45777	2.58223	3.00411	2.51268	2.69967	2.40025	1.90016	2.19164	2.16402	0.543018	0.812182	0.312747	0.555982	0.484713	0.139414	0.490264	0.371464	1.68248	1.23951	1.85581	1.5926	2.27115	2.6046	2.57223	2.48266	2.616	2.73142	2.68279	2.67674	0.461417	0.578075	0.645044	0.561512	0.416403	0.977479	1.07268	0.822187
EVM0037312	0.748812	1.26443	1.51658	1.17661	0.719064	0.516807	0.654102	0.629991	0.692874	0.621047	0.544006	0.619309	0.205191	0.298531	0.081591	0.195104	0.364757	0.249776	0.608011	0.407515	0.347439	0.989933	0.723682	0.687018	0.192129	0.216193	0.229561	0.212628	0.450101	0.167728	0.109247	0.242359	0.056121	0.038201	0.02556	0.0399607	0.295772	0.323326	0.22793	0.282343
EVM0041073	5.6733	6.98407	5.55937	6.07225	7.59566	6.18383	7.20453	6.99467	0.694023	0.120118	0.342223	0.385455	3.73359	4.06527	5.32066	4.37317	8.11149	7.85059	10.9841	8.98206	11.3759	13.9944	12.2407	12.537	7.85022	7.94635	7.9	7.89886	0.227841	0.28546	0.704759	0.40602	6.52536	7.97158	9.21786	7.90494	9.68457	10.2445	10.817	10.2487
EVM0037311	0.763699	1.08801	0.966669	0.93946	0.328429	0.732879	0.282861	0.448056	0.674445	0.819666	0.757345	0.750485	0.250717	0.125194	0.198568	0.191493	0.594761	0.382742	0.47424	0.483914	0.995884	0.821818	0.985246	0.934316	1.1606	1.12321	1.35108	1.21163	0.598167	0.984288	0.930781	0.837745	0.154331	0.463466	0.413066	0.343621	0.595243	0.331368	0.635232	0.520614
EVM0032579	3.10491	2.7645	3.44278	3.10407	22.5907	23.8545	25.0421	23.8291	65.4027	63.1768	64.5196	64.3664	154.802	157.729	149.469	154	68.0065	69.17	73.9595	70.3787	2.12855	2.15541	2.33548	2.20648	18.9129	19.3411	18.2266	18.8269	63.7642	61.2967	62.5334	62.5314	159.796	154.563	165.99	160.116	66.0974	61.7324	64.6897	64.1732
Salix_babylonica_newGene_5466	0.474745	0.760415	1.12869	0.787951	0.716737	0.456565	1.27318	0.815495	0.24421	0.508637	0.55903	0.437292	0.445963	0.395735	0.143108	0.328269	0.21095	0.421375	0.243276	0.291867	0.856855	0.877038	1.15294	0.962279	0.933591	1.13284	0.824232	0.963553	0.869626	1.39274	1.10959	1.12398	0.30246	0.234252	0	0.178904	0.240634	0.331648	0.541777	0.371353
EVM0044322	1.08638	1.40315	1.35791	1.28248	1.21527	1.4038	1.16263	1.26057	0.633082	0.758115	0.704342	0.698513	0.478491	0.537766	0.341558	0.452605	0.475225	0.348741	0.287309	0.370425	0.785626	0.672293	0.803153	0.753691	0.801181	0.942506	0.991232	0.91164	1.25596	1.10021	0.727578	1.02792	0.479331	0.422128	0.491826	0.464428	0.598358	0.61633	0.570808	0.595165
EVM0055114	10.9786	11.039	11.093	11.0369	10.3486	9.12496	9.34808	9.60721	11.9308	11.0578	10.0994	11.0293	9.16033	9.01337	9.76595	9.31322	10.4661	11.4641	8.55834	10.1629	7.15876	5.53303	5.51225	6.06801	4.73812	4.08762	5.12372	4.64982	6.62239	6.57986	5.41379	6.20535	4.8648	6.88665	5.05357	5.60167	7.49609	8.08782	8.79035	8.12475
EVM0055116	0.407549	1.31474	0.694572	0.80562	0.410948	0.672846	0.608288	0.564027	0.277557	0.501461	1.18189	0.653635	0.090773	0.202987	0.123105	0.138955	0.330084	0.517485	0.245347	0.364305	0.203295	1.09817	0.481556	0.594339	4.95278	4.3511	4.00673	4.43687	1.60847	1.40742	1.51677	1.51088	1.64037	1.38305	1.60125	1.54156	2.33468	2.27792	2.67734	2.42998
EVM0055110	7.07075	9.9541	7.9895	8.33812	3.66288	4.07322	3.67935	3.80515	3.3414	3.75446	2.91953	3.33847	3.88793	4.2231	3.16734	3.75946	3.47355	3.27792	3.38136	3.37761	3.47443	3.49588	3.26289	3.41107	1.77835	1.88785	1.99625	1.88749	2.25283	1.68623	1.48308	1.80738	1.80555	2.03823	2.38415	2.07598	1.5173	1.4689	1.75442	1.58021
EVM0040665	1.65204	1.5365	1.47308	1.55387	2.15844	2.23312	3.1896	2.52705	4.20469	2.53506	5.07201	3.93725	4.36151	4.18839	5.16174	4.57055	4.40516	3.81009	4.21199	4.14241	0.543636	0.778261	0.53894	0.620279	0.991257	0.412182	0.288942	0.564127	1.12446	0.742272	1.19666	1.02113	0.78038	0.714991	1.26876	0.921378	1.08974	0.885173	0.638904	0.871273
EVM0011169	0.113154	0	0.427228	0.180127	0.673193	0.167729	0.199282	0.346735	2.11487	2.44932	2.13365	2.23261	4.52039	4.32672	4.74985	4.53232	1.33041	1.33565	2.05179	1.57262	0.16665	0.259692	0.079158	0.1685	0.237616	0.280523	0.673748	0.397296	1.6555	0.826723	0.392401	0.958209	1.57713	1.47789	1.54579	1.5336	1.16402	0.768749	1.03229	0.988355
EVM0011166	12.4028	10.1652	10.4636	11.0105	7.6891	8.22474	8.35869	8.09084	5.3915	5.85375	5.70268	5.64931	2.11852	2.01172	1.79325	1.9745	6.26442	6.73032	7.66537	6.8867	6.78962	4.65865	6.9563	6.13486	3.87554	4.90834	3.7455	4.17646	6.803	6.30123	6.21157	6.4386	4.49069	4.45223	3.67774	4.20689	5.88607	7.1031	5.92237	6.30385
EVM0011160	9.3873	8.0517	8.34652	8.59517	7.5445	7.21316	7.42838	7.39535	4.57829	4.67652	4.7085	4.65444	9.79378	10.0899	9.87028	9.918	18.6752	16.6216	17.2427	17.5132	13.2405	15.0796	13.0405	13.7868	3.81446	3.30767	3.28275	3.46829	3.25951	3.16985	3.51042	3.31326	8.75198	9.41792	8.02038	8.73009	13.5954	13.9797	14.7642	14.1131
Salix_babylonica_newGene_2969	1.71342	2.53877	0.703549	1.65192	0.693119	1.38802	1.05722	1.04612	2.72966	3.42201	2.58513	2.91227	5.75985	5.7117	4.54836	5.33997	4.20155	4.35872	3.84246	4.13424	2.17878	1.09656	1.15625	1.4772	1.34382	1.63288	1.62672	1.53447	5.37519	5.45029	4.88389	5.23646	12.4803	9.00459	12.5746	11.3532	7.7536	5.93968	6.2627	6.65199
Salix_babylonica_newGene_2968	3.18781	2.30274	1.51179	2.33411	3.09713	4.15999	4.4886	3.91524	16.9635	11.3916	13.5124	13.9559	24.2357	28.6921	21.101	24.6763	15.6188	17.9565	17.1757	16.917	4.38695	4.22064	5.085	4.56419	5.97292	7.63623	7.86944	7.15953	15.4987	18.3748	19.9583	17.9439	32.2708	15.9678	23.4743	23.9043	14.0989	14.4448	11.0035	13.1824
Salix_babylonica_newGene_2961	5.21209	9.516	6.84932	7.19247	15.396	7.88785	13.3327	12.2055	9.91577	6.84813	13.8567	10.2069	5.80674	4.20154	10.4466	6.81831	5.49781	5.10649	4.79599	5.13343	4.02026	6.82828	6.83828	5.89561	8.6479	9.96726	15.3675	11.3276	6.643	7.01438	7.08765	6.91501	8.06435	4.03105	8.69927	6.93156	9.71474	9.35433	7.83273	8.96727
Salix_babylonica_newGene_2960	3.16818	2.41402	2.75695	2.77972	1.39096	1.50192	1.08456	1.32581	1.50002	2.2374	1.58421	1.77388	1.01292	1.77122	2.59896	1.79437	2.48162	3.36377	2.8532	2.89953	1.88562	2.5376	1.87367	2.09897	1.02335	0.748594	0.958548	0.910165	1.12331	1.45793	1.73331	1.43818	1.43029	2.3296	1.16976	1.64322	0.773556	2.60912	3.19546	2.19271
EVM0014601	5.03351	5.27655	5.18468	5.16491	6.23057	7.46727	7.41885	7.03889	12.1504	12.2469	11.0408	11.8127	11.0667	11.7222	11.1664	11.3184	4.81004	5.67388	7.69054	6.05815	4.48807	3.94581	3.7666	4.06683	6.48982	7.28309	6.78458	6.8525	8.3331	7.62931	8.24115	8.06785	7.38369	8.1785	7.76107	7.77442	3.9431	4.84052	3.26439	4.016
EVM0014604	75.8906	71.5423	73.5724	73.6684	31.7976	31.093	31.7825	31.5577	19.8542	17.5716	20.3714	19.2658	130.562	139.175	141.699	137.145	106.023	106.801	110.604	107.809	98.0693	93.436	91.1092	94.2048	43.7525	44.069	45.1051	44.3089	21.1944	21.0756	19.3867	20.5522	116.188	112.318	119.609	116.039	157.798	157.488	154.779	156.688
EVM0014609	1.86071	1.88292	1.26041	1.66801	3.54769	1.86267	2.96557	2.79198	4.71352	2.94729	4.21676	3.95919	4.90609	3.68587	2.92696	3.83964	4.69797	4.58282	3.85997	4.38025	1.38639	0.567317	0.704343	0.886016	0.990775	1.34198	0.605341	0.979367	2.07187	0.908288	0.515316	1.16516	0.991183	0.863873	1.05266	0.96924	0.781686	0.703241	0.87036	0.785096
EVM0014608	9.29334	9.39316	9.43736	9.37462	4.94227	5.44192	4.31765	4.90061	3.2736	5.20575	3.73724	4.07219	1.46392	0.989392	1.09856	1.18396	2.9399	3.69457	2.93807	3.19084	8.78583	8.8102	10.2475	9.28119	4.91019	4.72648	5.78288	5.13985	5.00713	4.25971	4.23385	4.50023	0.904811	1.20707	0.78102	0.9643	1.93516	1.73524	1.4365	1.7023
EVM0029159	2.33368	2.5185	2.68109	2.51109	1.8032	2.02808	1.77006	1.86711	1.08682	1.55653	1.41047	1.35128	0.708438	0.90497	0.657772	0.75706	0.944244	0.666868	1.24787	0.952992	2.50696	3.05395	2.5996	2.72017	1.36183	2.20226	2.38533	1.98314	1.53701	2.17594	0.95294	1.5553	1.14099	0.824123	1.23155	1.06555	1.43372	1.64453	1.47814	1.5188
EVM0024846	1.268	2.25874	1.17169	1.56615	3.4666	1.96857	1.78862	2.40793	0	4.06825	4.13871	2.73565	3.55575	3.49257	2.00753	3.01861	4.18889	0.425624	0.610392	1.74163	6.51731	6.67128	6.70756	6.63205	7.86505	0	2.65844	3.50783	3.89415	2.98563	5.58644	4.1554	2.79959	1.84305	5.25048	3.29771	4.98104	3.84047	3.59848	4.14
EVM0050898	2.14914	1.86976	1.62763	1.88218	0.454591	0.623313	0.973466	0.68379	0.11238	0.156868	0.253396	0.174215	0	0	0	0	0.29036	0.355321	0	0.215227	2.09477	1.69876	2.40053	2.06469	2.15215	1.77317	1.47078	1.7987	0.580655	1.82933	1.13943	1.18314	0.106267	0.356012	0.110162	0.190814	0.790004	1.11704	1.2406	1.04921
EVM0009061	12.2547	15.085	12.5891	13.3096	5.67751	5.17543	6.04638	5.6331	5.45859	5.19928	5.53765	5.39851	5.00793	4.59135	6.98535	5.52821	6.53963	5.86555	6.17417	6.19312	8.11472	9.83094	9.75497	9.23354	8.66272	7.45808	6.70485	7.60855	5.43717	6.7963	5.89989	6.04445	6.16998	5.40972	6.42181	6.0005	6.85659	7.07762	6.63459	6.85627
EVM0050894	3.17845	3.96979	3.78809	3.64544	7.52366	5.3682	6.80649	6.56612	6.03717	5.6365	5.05977	5.57781	1.93485	2.0705	1.5568	1.85405	3.18628	2.63193	2.08863	2.63561	3.31249	3.39024	3.21643	3.30639	4.78251	5.34693	6.07993	5.40312	5.74024	5.9643	5.72951	5.81135	2.82969	2.82482	2.69568	2.7834	2.24632	2.17871	2.45745	2.29416
EVM0009062	0.598412	0.417512	1.09594	0.703955	1.14234	1.60986	0.817491	1.1899	1.13056	1.05435	1.02891	1.07127	0.559406	0.493798	0.591879	0.548361	1.03611	0.436812	0.705616	0.72618	0.942717	1.02458	1.08247	1.01659	1.59933	1.39823	1.49267	1.49674	1.69481	1.74874	2.13662	1.86006	0.692821	0.818864	1.05293	0.854873	0.772005	0.776085	0.846179	0.79809
EVM0050892	0.33513	0.593838	0.255306	0.394758	0.52173	0.475732	0.389571	0.462344	0.830292	1.18437	0.948817	0.987827	0.730436	0.568481	0.857441	0.718786	0.714165	1.0206	1.18727	0.97401	0.869151	0.727547	1.40575	1.00082	0.767766	0.745107	1.09901	0.870626	1.66179	0.948488	1.48536	1.36522	0.653596	1.41983	0.953098	1.00884	1.10386	1.04104	1.38273	1.17588
EVM0050890	3.57978	3.27545	3.42855	3.42792	2.85563	4.31084	2.15929	3.10859	1.98062	3.60343	2.88948	2.82451	3.42073	3.70232	3.23093	3.45132	2.45226	4.54933	4.16592	3.7225	6.38355	7.89775	6.51621	6.9325	8.07881	7.04558	7.11947	7.41462	7.78497	6.73949	6.50592	7.01013	7.23393	5.66755	6.93766	6.61304	7.88488	7.09734	6.09084	7.02435
EVM0029154	1.18797	1.14879	1.05894	1.1319	0.703552	0.827221	0.923925	0.818233	0.676985	0.962321	0.647621	0.762309	0.50631	0.215879	0.28758	0.33659	0.47354	0.3086	0.439957	0.407366	1.09059	0.996728	1.29679	1.12804	0.923105	0.741139	0.677263	0.780502	0.805864	1.06716	0.391186	0.754736	0.409298	0.51845	0.354382	0.427377	0.663393	0.902199	0.633866	0.733153
EVM0028289	20.3552	23.6648	24.3057	22.7753	16.8354	16.322	12.6316	15.263	10.3371	8.39938	8.21001	8.98218	4.98166	7.37677	7.22499	6.5278	12.6594	7.06827	12.5025	10.7434	27.1235	31.9296	31.1542	30.0691	19.8674	18.7733	21.362	20.0009	16.6021	17.5153	15.9006	16.6727	7.38091	5.27022	7.2611	6.63741	7.83756	7.2254	6.62655	7.22984
EVM0012600	7.18935	7.86355	7.61636	7.55642	6.02129	6.0261	5.69567	5.91436	6.25875	6.69903	6.04075	6.33285	7.82965	7.79702	8.91544	8.1807	8.95118	10.8806	9.13473	9.65551	20.2948	17.8864	17.9779	18.7197	15.7439	16.2463	16.8196	16.27	24.5503	21.3921	21.4464	22.4629	21.5739	22.0021	25.4635	23.0132	16.3603	17.0166	19.4526	17.6098
EVM0028280	3.19685	3.97181	3.63699	3.60188	1.96378	2.22821	2.19497	2.12899	1.98073	2.38255	1.94162	2.10164	1.09768	0.777859	1.19776	1.02443	1.48475	2.20363	1.33186	1.67341	5.48918	5.3708	5.64349	5.50116	2.27368	1.67492	2.12617	2.02492	2.28763	2.4747	2.32487	2.3624	2.40531	2.89906	2.58904	2.63114	2.76783	1.94612	2.6552	2.45638
EVM0028281	12.4383	12.1737	10.3408	11.6509	12.9345	13.4138	12.643	12.9971	4.43931	4.69027	5.33493	4.8215	8.25328	7.38306	7.82512	7.82049	10.9597	9.92405	9.43926	10.1077	10.73	13.3719	12.8515	12.3178	19.7969	18.2373	18.9787	19.0043	12.1167	11.8538	13.9016	12.6241	10.172	11.79	11.1344	11.0321	12.1781	9.87453	11.208	11.0869
EVM0020816	0.608011	0.30882	1.0291	0.648643	0.903083	1.35553	1.24216	1.16692	1.05213	1.80381	1.54947	1.46847	2.38875	1.35888	1.6604	1.80268	2.12832	1.9784	2.26371	2.12348	0.932818	0.883287	1.46751	1.09454	1.2387	1.724	1.32042	1.4277	1.25666	1.87545	1.239	1.45704	1.44603	2.53289	1.36363	1.78085	1.68518	1.64188	3.02958	2.11888
EVM0003203	0.346513	0.593972	0.547602	0.496029	2.2076	1.81955	2.00171	2.00962	0.238537	0.186709	0.028674	0.151307	1.78916	2.56398	1.91063	2.08792	2.06367	1.83385	1.57971	1.82574	0.502926	0.118418	0.481674	0.367673	1.10576	1.00191	0.880535	0.99607	0	0.086764	0.089888	0.058884	1.22202	2.0668	1.68349	1.65744	1.83433	2.76557	1.82412	2.14134
EVM0028287	6.25405	5.14499	5.48747	5.62884	13.3109	14.278	12.3129	13.3006	16.5518	16.5174	16.822	16.6304	9.48617	10.4445	10.917	10.2826	6.68465	6.77006	7.84157	7.09876	4.38314	5.63492	5.75892	5.25899	8.19396	7.64202	8.45282	8.09627	8.89651	8.0262	6.83293	7.91854	6.72255	7.06558	8.24435	7.34416	6.22088	5.94919	5.68702	5.95236
EVM0020818	2.84944	2.93245	3.17005	2.98398	2.85487	4.1452	3.20256	3.40088	0.909824	0.933655	0.947749	0.930409	1.04091	0.751132	0.459982	0.750673	2.72274	1.91371	2.74247	2.45964	2.77674	2.16195	2.2296	2.38943	5.83327	6.01178	5.17404	5.67303	1.18022	1.62516	1.74936	1.51825	0.613961	2.15321	1.58219	1.44979	2.60748	2.03292	1.87862	2.17301
EVM0056492	43.9145	41.7318	42.4821	42.7095	35.5621	40.9125	40.0698	38.8482	50.4398	43.4104	43.6081	45.8194	63.3755	56.8401	62.0153	60.7436	49.278	45.7851	53.4632	49.5088	23.6859	24.173	23.2904	23.7164	26.7843	23.1152	29.5054	26.4683	19.2222	20.6389	20.4793	20.1134	28.7844	28.4535	28.7059	28.6479	25.0704	27.2273	25.9007	26.0661
EVM0056498	6.47809	5.34146	6.42415	6.08123	18.1991	17.8159	17.1742	17.7298	4.09305	4.35388	3.51767	3.9882	3.48757	5.55508	4.08883	4.37716	2.20885	3.02789	2.23731	2.49135	2.6224	2.48465	2.26747	2.45817	44.2906	48.2682	51.3715	47.9768	7.76154	8.75067	8.61376	8.37532	11.3764	10.6556	10.249	10.7603	5.33448	5.18648	5.91836	5.47977
EVM0023162	56.5903	76.6493	52.9652	62.0683	67.7825	65.2699	64.9324	65.9949	51.3536	58.2992	56.9598	55.5375	34.476	34.5759	29.5296	32.8605	33.0998	38.4935	31.969	34.5208	32.9365	34.4864	38.134	35.1856	124.496	135.666	121.154	127.105	124.252	122.734	127.576	124.854	101.543	91.2066	94.02	95.5898	107.985	102.598	112.305	107.629
EVM0023165	10.3535	9.77219	10.0344	10.0534	4.6085	5.57702	5.16625	5.11726	6.04218	4.32893	5.3441	5.2384	3.70769	3.42088	3.32105	3.4832	7.20016	5.61491	6.81325	6.54277	7.72157	8.25884	9.73577	8.57206	5.20275	4.90895	4.98712	5.03294	7.37412	6.03867	6.81531	6.7427	4.7103	5.38981	4.71005	4.93672	5.49726	5.63142	5.70547	5.61139
EVM0036132	1.73371	1.63729	2.23629	1.8691	2.07531	1.43125	1.3109	1.60582	0.478629	0.744139	0.965694	0.729487	0.364494	0.446236	0.56528	0.45867	0.68611	0.614128	0.555353	0.61853	1.88324	2.70357	2.14516	2.24399	2.70075	2.75407	3.13298	2.8626	1.77135	2.22394	2.49752	2.16427	0.884984	0.453383	1.16121	0.833192	1.14504	1.7611	1.6896	1.53191
EVM0039081	0.74407	0.253489	0.450357	0.482639	11.7589	9.11615	7.84769	9.57425	0.974354	0.771765	0.974289	0.906803	0.576529	1.54215	0.354286	0.82432	0.229398	0	0.250428	0.159942	0.238301	0.206669	0.336548	0.260506	1.23137	1.39607	2.03301	1.55348	0.078644	0.084447	0.16287	0.108654	0.339584	0.149763	0.158209	0.215852	0	0.081394	0	0.0271313
EVM0018970	19.7816	31.874	16.8099	22.8218	27.0596	20.5577	23.777	23.7981	20.1748	20.8449	22.0011	21.0069	31.0044	27.6089	34.6988	31.104	30.8859	27.8516	28.5271	29.0882	29.1969	27.8699	30.911	29.3259	53.9248	57.5956	57.0465	56.189	47.8714	42.992	43.8236	44.8957	44.0333	40.9382	45.439	43.4702	62.1828	57.4984	64.0714	61.2509
EVM0018973	1.05131	0.845908	1.13988	1.01237	0.421126	0.129359	0.469396	0.33996	0.061167	0.033473	0.075809	0.0568163	0.190558	0.027462	0.077196	0.0984053	0	0.041333	0	0.0137777	0	0	0.132669	0.044223	0.116628	0.043393	0.118759	0.0929267	0.044939	0	0	0.0149797	0.035242	0.066742	0	0.0339947	0.029336	0.054192	0.114259	0.065929
EVM0018972	5.7847	6.43124	6.05365	6.08987	7.54917	8.63644	8.30029	8.16197	8.11591	6.66691	6.81045	7.19776	3.32394	4.2577	3.0539	3.54518	4.22876	4.75784	3.88894	4.29185	5.02834	6.19944	6.51495	5.91424	8.57614	8.76754	7.27752	8.20707	10.0905	8.89648	8.5622	9.18305	4.51612	4.97807	5.32846	4.94088	4.33691	4.73345	4.52223	4.53087
EVM0018977	0.922293	1.14636	0.794497	0.954383	1.06403	1.125	0.885449	1.02482	0.808372	0.656138	0.425978	0.630163	0.267803	0.234812	0.137881	0.213499	0.365428	0.271433	0.201657	0.279506	0.847903	0.975231	1.18532	1.00282	0.734045	0.700049	0.882968	0.772354	0.904331	0.755274	1.00807	0.889224	0.518351	0.467047	0.191209	0.392202	1.08458	0.772576	0.599461	0.818874
EVM0018976	1.29277	0.846195	0.905127	1.0147	0.772469	1.11939	0.366295	0.752718	0.290997	0.350629	0.374317	0.338648	0.200444	0.456755	0.301959	0.319719	0.703558	0.490873	0.623342	0.605924	1.01005	0.271541	1.01419	0.765261	0.984714	1.22288	1.50829	1.23863	0.832512	0.547403	0.65354	0.677818	0.396299	0.311876	0.805054	0.50441	0.808318	0.843694	0.868664	0.840225
EVM0018979	42.0314	42.0507	42.3768	42.153	22.4049	23.7608	23.464	23.2099	17.0995	17.4323	17.7128	17.4149	20.2643	19.0712	21.2228	20.1861	29.1862	27.6156	26.4924	27.7648	48.2236	47.4068	45.1667	46.9324	21.2857	20.7117	20.3759	20.7911	24.8867	24.9395	24.1544	24.6602	23.5114	24.3323	22.8773	23.5736	25.7689	23.6102	25.2117	24.8636
EVM0018978	16.0717	15.8788	15.2517	15.734	22.7171	25.4371	23.1985	23.7842	26.7625	25.4853	27.0814	26.4431	19.4265	20.1778	18.4212	19.3418	18.47	16.3617	18.3485	17.7267	19.8172	24.463	19.8297	21.37	34.0681	37.4362	34.4446	35.3163	45.1641	45.2499	51.1258	47.1799	30.0211	29.582	25.9657	28.5229	24.9492	23.1827	23.7206	23.9508
EVM0027886	40.2301	43.5311	43.265	42.342	76.9764	68.4148	71.3043	72.2318	66.5104	75.6198	70.7287	70.953	40.2786	40.8874	39.271	40.1457	39.8335	40.2156	41.0645	40.3712	43.6402	43.2753	47.5001	44.8052	71.46	79.6958	75.0441	75.4	82.6723	96.7983	97.6528	92.3745	61.016	60.4218	63.6714	61.7031	48.6868	41.5802	45.4101	45.2257
EVM0027883	7.85706	7.15631	6.36662	7.12666	4.40854	4.91781	7.00397	5.44344	6.42529	3.73199	3.65006	4.60245	1.7313	2.13636	2.83647	2.23471	2.52095	3.8627	4.08319	3.48895	4.65954	5.57179	8.5509	6.26074	4.46945	4.76351	4.84053	4.69116	5.13266	4.99453	5.38195	5.16972	5.58636	5.13542	3.82034	4.84737	2.78605	3.3645	2.98172	3.04409
EVM0011839	19.0419	20.2137	19.0481	19.4346	21.8899	19.3419	19.9465	20.3928	17.6548	19.5487	19.1814	18.795	10.2046	11.4233	11.1164	10.9148	11.3653	10.8124	11.8205	11.3327	22.038	20.0323	21.5291	21.1998	17.2458	15.2995	17.1616	16.569	16.7625	14.5332	14.5514	15.2823	10.2533	7.76474	9.5965	9.20486	11.2593	9.81419	11.6633	10.9123
EVM0027888	16.0999	18.6865	14.2427	16.343	7.34239	7.40135	7.46614	7.40329	5.49639	4.53671	6.77601	5.60304	3.83891	6.34424	4.24442	4.80919	9.33023	10.0464	8.54398	9.30687	31.6446	30.3039	30.3625	30.7704	13.3559	13.4979	10.5371	12.4636	19.7342	16.1642	16.1957	17.3647	22.3881	19.3805	19.9711	20.5799	20.6312	19.1419	18.6843	19.4858
Salix_babylonica_newGene_726	0.966799	1.0521	0.953577	0.990826	1.60455	1.59399	1.97646	1.725	1.49169	1.70872	1.87336	1.69126	0.990545	0.72218	1.00174	0.90482	1.22162	1.69475	1.39243	1.43627	4.45615	5.49392	4.80507	4.91838	5.8151	5.43813	5.47128	5.57484	5.5441	8.10059	6.45811	6.70093	4.40761	5.81823	3.11719	4.44768	4.99765	4.66729	4.29426	4.65307
EVM0004467	10.2717	9.42355	7.39371	9.02967	8.46982	9.25354	9.91005	9.21114	28.2672	25.2232	25.7657	26.4187	41.3245	39.2006	37.5383	39.3545	29.5162	30.3545	32.6371	30.8359	8.59836	8.35544	9.27697	8.74359	5.02294	4.96428	5.4004	5.1292	13.0148	11.8688	11.8926	12.2588	12.9989	14.0184	14.4119	13.8097	14.8175	16.1035	16.4969	15.806
EVM0037914	3.41397	3.62323	5.70139	4.2462	4.77827	4.9377	5.40989	5.04195	0.730635	0.860688	1.12607	0.905799	1.10134	0.911385	1.29594	1.10289	1.45074	1.55176	3.20461	2.06904	5.11729	4.13436	4.02796	4.42654	7.5831	7.71768	7.78251	7.69443	3.23121	3.55052	3.01542	3.26572	3.16446	2.54791	1.99949	2.57062	2.86645	2.67841	2.92727	2.82404
EVM0002159	2.12242	2.76319	3.33215	2.73925	4.4389	2.82226	3.03446	3.43187	2.99417	2.57156	2.65918	2.74163	4.39853	7.48536	4.78322	5.5557	7.50062	4.5901	8.06597	6.7189	14.7685	15.7327	14.4359	14.979	18.6689	19.8655	19.759	19.4311	20.5658	16.0091	21.6537	19.4095	37.2212	32.5187	36.8666	35.5355	27.8739	29.8071	27.8258	28.5022
EVM0002155	41.1931	45.6833	40.4613	42.4459	59.7762	57.9556	56.903	58.2116	85.2698	88.8657	83.4202	85.8519	90.7963	93.5088	89.1791	91.1614	55.8937	57.648	55.8603	56.4673	41.019	44.7452	43.992	43.2521	48.9267	51.175	47.6929	49.2648	56.5334	50.8721	58.4247	55.2768	73.5396	69.5041	69.3768	70.8068	60.7906	59.0739	57.8151	59.2265
EVM0002157	1.32679	2.56908	2.28355	2.05981	0.899908	1.15908	1.00543	1.02148	0.925988	1.3358	0.905405	1.05573	1.00327	0.518418	1.02279	0.848156	1.20197	0.432755	0.917594	0.850773	1.74755	1.53924	2.34084	1.87587	2.26486	2.30323	2.18235	2.25015	0.467094	2.64218	2.63749	1.91559	1.39817	0.927355	1.04922	1.12491	0.943888	0.873013	1.20522	1.00737
EVM0002150	2.46186	2.98635	2.64253	2.69691	1.59527	1.50119	1.50402	1.53349	0.551379	0.558268	0.565243	0.558297	0	0.048805	0.148713	0.0658393	0.558144	0.698926	1.53338	0.930151	2.36692	2.83676	4.00306	3.06891	3.18769	3.19887	2.67838	3.02165	2.05457	2.01752	1.9964	2.02283	0.754583	1.10645	0.348692	0.736576	1.39823	2.1464	1.85142	1.79868
EVM0034351	6.19861	4.78639	4.44061	5.14187	5.60344	6.11142	4.30912	5.34133	10.199	11.2753	10.8093	10.7612	13.243	12.723	13.3072	13.0911	9.71539	13.2241	13.5173	12.1523	8.47725	7.53136	6.98132	7.66331	8.68426	10.2324	8.63359	9.18343	13.9176	16.0144	14.5838	14.8386	10.286	10.9339	10.4336	10.5511	11.1298	10.6001	12.2014	11.3105
EVM0024433	12.2298	9.56318	12.5116	11.4349	4.14356	5.43013	4.61984	4.73118	7.02374	6.68052	7.58876	7.09767	7.18045	5.81719	6.84661	6.61475	12.0891	13.1336	11.4958	12.2395	21.8127	24.3855	23.1795	23.1259	5.50817	5.86382	7.33688	6.23629	6.06002	6.27495	7.84914	6.72804	11.7953	8.08835	10.2756	10.0531	12.6186	11.7381	11.8107	12.0558
EVM0041626	4.82113	5.05961	4.94167	4.94081	5.41363	5.15862	5.27357	5.28194	6.27616	5.24432	6.24721	5.92256	7.06099	7.12148	6.78142	6.98797	6.1971	6.4822	6.6045	6.42793	2.99371	3.81457	3.16382	3.32403	2.47389	2.72596	2.60662	2.60216	2.76917	3.32889	2.65358	2.91721	1.9689	2.49088	2.49402	2.31793	3.18619	2.52397	3.83651	3.18223
EVM0024437	71.7715	71.7563	61.9555	68.4945	46.5251	40.8562	43.551	43.6441	72.2001	68.2936	69.9862	70.16	97.42	95.088	92.6526	95.0535	56.1014	62.1259	70.0414	62.7562	42.9668	47.9273	47.0521	45.9821	25.3592	25.235	23.7445	24.7795	21.2891	24.8869	25.5951	23.9237	41.1534	30.9273	45.1381	39.073	37.8328	44.2742	45.1487	42.4186
EVM0041625	15.5555	13.9548	15.0296	14.8466	7.33605	9.74566	8.76368	8.61513	5.72664	6.06632	6.23332	6.00876	4.17372	4.72311	3.64528	4.1807	4.56518	4.56655	5.35201	4.82791	6.28172	5.67801	6.34272	6.10082	7.78938	9.30916	8.42518	8.50791	5.79051	6.40284	7.20085	6.46473	5.49102	5.63882	6.2643	5.79805	3.52788	3.78619	3.60288	3.63898
EVM0027262	5.10192	4.94273	4.93806	4.99424	4.91708	5.24224	5.7137	5.29101	5.95547	5.70312	6.23804	5.96554	7.56871	7.34418	7.79774	7.57021	8.83707	9.44173	10.0757	9.45152	7.67843	8.04285	6.40314	7.37481	3.91047	3.27643	4.54524	3.91071	5.58723	5.77734	5.48054	5.61504	6.21868	6.43213	6.87086	6.50722	8.89522	9.54267	10.1033	9.51374
EVM0027264	126.451	110.83	115.038	117.44	45.2995	43.494	45.125	44.6395	11.4561	10.7917	9.81592	10.6879	4.92915	5.56536	5.75886	5.41779	26.2151	25.9789	29.1691	27.121	103.768	101.585	99.6178	101.657	47.0227	44.9525	44.3304	45.4352	19.0649	20.318	22.8592	20.7473	14.9844	14.1704	13.7215	14.2921	15.8078	16.1001	15.1992	15.7024
EVM0027269	6.53957	5.19357	6.17826	5.97047	7.89361	8.9182	9.43095	8.74759	5.01706	3.82018	3.93329	4.25684	9.58137	12.3952	9.84291	10.6065	8.13373	7.93678	8.56788	8.21279	6.72168	5.12318	7.38223	6.40903	11.1707	11.6217	11.2914	11.3613	6.94854	7.62402	7.06308	7.21188	13.9912	15.0977	14.9699	14.6863	12.4621	10.4797	11.6616	11.5345
EVM0041622	2.29094	3.05827	2.52056	2.62326	2.93819	3.12665	1.87984	2.64823	2.22848	2.39652	3.2779	2.6343	1.85863	2.11849	1.53647	1.83787	0.991589	1.27606	0.999935	1.08919	5.70222	4.97833	5.07241	5.25099	4.74961	4.11493	4.49034	4.45163	2.37761	3.35202	1.87297	2.5342	2.19292	1.88019	1.6841	1.91907	2.16951	1.74044	2.09972	2.00322
EVM0041621	0.176316	0.183695	0.222585	0.194199	0.145995	0.150394	0.209391	0.168593	0.060708	0.064812	0.035777	0.0537657	0	0.037	0	0.0123333	0	0.065481	0	0.021827	0.210159	0.296985	0.1945	0.233881	0.379964	0.324282	0.399099	0.367782	0.11263	0.041806	0.124516	0.092984	0.315399	0.179812	0.293272	0.262828	0.362775	0.41732	0.422289	0.400795
EVM0053971	2.95552	4.34525	3.78994	3.6969	4.12356	2.11734	3.79554	3.34548	2.77724	3.1054	3.04755	2.97673	2.15765	2.19162	3.2027	2.51732	5.81583	4.4261	5.0771	5.10634	5.90691	6.24898	6.28322	6.14637	4.40083	5.03259	6.12521	5.18621	6.21174	6.19295	4.98128	5.79532	6.99546	5.6617	6.20376	6.28697	6.97555	7.78212	9.17836	7.97867
EVM0053977	10.9649	11.1572	10.8175	10.9799	16.6998	22.2308	15.0866	18.0057	12.409	13.4861	13.4607	13.1186	9.38469	10.9191	10.025	10.1096	8.10286	9.1979	10.4752	9.25866	10.4794	9.07379	10.1981	9.91711	14.6218	16.7041	17.2904	16.2054	15.2965	12.8381	15.5269	14.5538	9.96495	10.1262	10.6606	10.2506	9.91854	6.82395	7.35579	8.03276
EVM0019738	6.69361	6.33081	6.96238	6.66227	4.43627	4.22553	5.24268	4.63483	3.35492	4.90915	3.16924	3.8111	3.15913	5.54216	4.46384	4.38837	4.48211	4.48501	4.29806	4.42173	6.56984	6.11317	5.93069	6.20456	2.48307	2.05447	2.31854	2.28536	3.22835	2.93445	3.1891	3.1173	1.58011	2.73685	2.10725	2.1414	3.42926	3.38013	3.42366	3.41102
EVM0019731	190.935	203.364	188.787	194.362	52.1692	59.307	51.3335	54.2699	126.015	132.833	129.325	129.391	162.584	166.739	161.835	163.719	158.751	168.6	179.847	169.066	200.398	210.598	209.268	206.755	70.2924	75.3768	77.2558	74.3083	122.529	127.064	117.871	122.488	183.578	165.54	181.951	177.023	200.407	193.366	198.954	197.576
EVM0019734	21.8317	21.1415	20.4172	21.1301	8.64863	8.72628	8.6669	8.6806	9.643	10.0642	10.4978	10.0683	7.69876	9.10155	9.95422	8.91818	12.7876	13.1402	12.8795	12.9358	22.6543	20.8229	22.4441	21.9738	11.2527	10.3601	10.373	10.6619	11.3937	11.1604	11.3876	11.3139	10.5129	11.0046	10.0224	10.5133	12.9655	11.0778	12.4734	12.1722
EVM0013152	66.6729	66.2625	66.5422	66.4926	69.6494	71.5646	64.7048	68.6396	74.1012	73.8012	69.3096	72.404	62.5254	60.5525	61.5314	61.5364	55.9262	62.1259	58.9679	59.0067	27.2739	26.275	26.7113	26.7534	27.8065	28.5051	30.9612	29.091	32.3339	32.8955	34.0388	33.0894	29.9063	29.0618	30.0274	29.6652	27.0163	25.3375	24.8411	25.7316
EVM0013158	0.750244	1.2785	1.14104	1.0566	1.25989	1.32346	0.984985	1.18945	1.42335	1.42411	0.854097	1.23385	0.871422	0.913961	0.620644	0.802009	1.14215	1.3663	0.952079	1.15351	0.913843	0.563846	0.544562	0.674084	1.99244	1.57236	1.45156	1.67212	2.10239	2.4439	2.02606	2.19078	1.40679	1.00073	0.738505	1.04868	0.951876	0.753539	0.787118	0.830844
EVM0006486	18.383	18.6845	18.2651	18.4442	18.3907	16.5932	14.3473	16.4438	17.8863	16.7351	16.2791	16.9668	15.4946	18.8929	14.4325	16.2734	19.565	16.3108	16.4521	17.4426	43.7746	42.1635	45.4872	43.8084	28.5824	33.0076	35.2143	32.2681	42.6813	44.3183	44.2193	43.7396	31.2269	30.1213	34.9134	32.0872	35.4554	32.5778	34.7792	34.2708
EVM0017725	0.107674	0.254491	0.594416	0.31886	0.447752	0.662974	0.766948	0.625891	1.47758	0.595628	0.89135	0.988186	1.28883	0.540039	0.856991	0.895286	1.23816	1.49436	1.20845	1.31366	1.34349	0.679886	1.24096	1.08811	0.864762	1.54487	1.6844	1.36468	0.921013	0.610929	1.13019	0.887379	1.55686	2.26894	2.1822	2.00267	1.09902	1.24785	1.69444	1.3471
EVM0049457	27.1284	27.3748	28.5674	27.6902	26.9877	25.6639	25.4855	26.0457	30.175	29.0272	30.028	29.7434	5.13851	4.76781	4.72123	4.87585	7.91034	6.7003	8.02726	7.54597	28.0272	27.135	30.4992	28.5538	25.7192	25.7365	26.0186	25.8248	35.8003	35.1538	37.2711	36.0751	11.7982	11.2323	12.0321	11.6875	14.7629	13.773	15.6822	14.7394
EVM0017721	1.33992	1.18449	1.2967	1.2737	0.482184	0.81113	1.02881	0.774042	0.486644	0.756678	0.437557	0.560293	0.266792	0.086857	0.333751	0.229133	0.835935	1.15731	1.32133	1.10486	1.61708	1.53598	1.52604	1.5597	0.861462	0.845174	0.582476	0.763037	0.850146	0.915639	1.5176	1.09446	0.485401	0.678755	0.790454	0.651537	0.990161	0.850589	1.16123	1.00066
EVM0017722	0	0	0	0	0	0	0	0	0.087843	0.068676	0.231003	0.129174	0.077084	0.545326	0.186329	0.26958	0	0.062674	0	0.0208913	0	0	0	0	0	0	0	0	0	0	0	0	1.55217	1.51125	0.767235	1.27688	3.9352	3.70499	3.22217	3.62079
EVM0049458	1.43402	1.12982	1.49241	1.35208	5.85786	5.04486	7.10498	6.00257	6.33849	7.14407	7.79461	7.09239	5.87854	5.5548	5.50722	5.64685	2.43967	1.84228	2.19428	2.15874	0.622703	0.151498	0.466383	0.413528	3.92559	3.88812	3.03764	3.61712	1.58139	1.9723	1.45534	1.66968	1.98993	3.35744	2.81272	2.72003	1.70389	2.14094	1.7324	1.85908
EVM0010715	24.0697	21.6545	24.3507	23.3583	43.6776	44.9026	46.1221	44.9008	43.758	45.5367	41.3713	43.5553	48.0135	46.2999	45.697	46.6701	50.9922	52.5954	49.1382	50.9086	38.5368	37.4167	40.1126	38.6887	68.5587	66.1374	71.6958	68.7973	57.4382	59.2409	56.7877	57.8223	57.2975	59.913	58.5768	58.5958	58.987	57.4118	59.1746	58.5244
EVM0010712	3.45086	3.89418	3.57853	3.64119	2.09076	2.00393	1.96223	2.01897	2.1204	2.30058	2.43559	2.28552	5.46132	4.68801	4.95383	5.03439	5.27353	4.98707	4.99756	5.08605	3.45836	3.47561	3.28355	3.40584	2.18952	2.35919	1.95275	2.16715	2.25023	2.81874	2.75038	2.60645	4.61255	4.38153	4.39433	4.4628	4.52653	5.10834	4.82593	4.82027
EVM0025131	15.1147	15.3246	15.4526	15.2973	8.19658	8.18434	9.68019	8.68704	4.71484	4.36443	4.4181	4.49912	1.73143	1.68821	2.59379	2.00448	4.84541	4.00378	5.26683	4.70534	14.7032	15.0219	14.6058	14.777	11.7841	11.6187	11.2751	11.5593	7.69963	8.50875	8.82434	8.34424	4.30896	4.17995	4.73012	4.40634	7.84494	7.06313	7.89257	7.60021
EVM0025130	1.55272	1.42047	1.93244	1.63521	1.00216	0.823294	0.722569	0.849342	0.651135	0.862617	0.739295	0.751016	0.442958	0.948377	0.390401	0.593912	1.2333	0.923785	0.377554	0.84488	1.51952	1.50504	1.31461	1.44639	0.924521	0.677125	0.938617	0.846754	1.28382	0.657378	0.522274	0.821156	0.8257	0.801828	0.929341	0.85229	1.12075	1.485	0.725692	1.11048
EVM0025132	34.4177	32.8608	34.7547	34.0111	25.9591	25.7475	28.3749	26.6938	19.56	18.3493	18.3354	18.7482	17.6905	17.0314	15.4581	16.7267	21.6835	21.641	19.1942	20.8396	42.003	41.3305	39.6229	40.9855	20.8303	22.3906	20.2514	21.1574	17.8822	17.6698	19.1086	18.2202	15.0752	17.2641	15.5324	15.9572	21.0256	19.1477	18.5751	19.5828
EVM0025138	4.47451	5.43502	4.52002	4.80985	5.44267	5.43993	5.76231	5.5483	7.0758	7.21096	6.80451	7.03042	10.0529	9.62686	7.30266	8.99414	9.82761	10.3114	10.2475	10.1288	7.4923	8.06468	8.55176	8.03625	5.16821	7.37453	5.10442	5.88239	10.8462	8.35853	8.8158	9.34018	11.5614	10.0505	9.51933	10.3771	12.9766	10.241	9.8806	11.0327
EVM0023991	8.072	8.99333	8.17994	8.41509	3.26656	2.83235	3.1519	3.0836	4.73136	4.10318	3.99061	4.27505	7.39056	6.49507	6.86753	6.91772	7.26153	7.0409	6.2029	6.83511	5.1639	4.65827	5.31566	5.04594	3.11135	3.27237	3.56144	3.31505	4.14284	3.79047	4.8087	4.24734	6.11446	5.92835	6.31788	6.12023	7.80738	9.39325	8.11964	8.44009
EVM0023990	27.7499	28.8044	26.3302	27.6282	18.9505	18.6623	17.6011	18.4046	12.7522	13.4543	12.1433	12.7833	5.92117	6.52453	6.40866	6.28479	10.3391	10.8917	10.7837	10.6715	22.3351	25.8937	26.9085	25.0458	12.6172	12.8144	12.288	12.5732	10.2969	8.94914	10.38	9.87537	5.60454	6.36373	7.25029	6.40619	10.2804	10.6441	10.8405	10.5883
EVM0023997	7.06023	6.49485	6.00023	6.51844	15.4678	16.9008	17.7955	16.7214	12.1714	11.1331	10.9745	11.4263	11.6184	11.5753	13.241	12.1449	8.4499	8.38924	7.83209	8.22374	5.40203	5.35308	5.66194	5.47235	17.1348	17.229	15.8955	16.7531	6.69637	6.46195	7.57078	6.9097	10.5042	11.9823	10.2039	10.8968	10.1176	8.38156	9.90206	9.46708
EVM0018121	17.936	14.1992	14.8595	15.6649	9.71095	6.12061	7.55821	7.79659	5.93396	6.98998	6.75394	6.55929	4.85967	6.77068	6.85255	6.16097	10.6143	9.45543	7.79938	9.28971	5.22728	5.75051	5.26802	5.41527	3.91939	3.34371	4.38154	3.88155	4.48443	4.53198	2.92616	3.98085	3.28768	2.85657	3.20139	3.11521	4.23663	2.60411	3.78905	3.54326
EVM0042543	2.34286	4.03073	1.75105	2.70821	3.65461	3.1935	3.66812	3.50541	3.14559	2.58897	2.52024	2.7516	0.865407	1.02127	1.13108	1.00592	0.881082	2.73516	1.36939	1.66188	1.6301	1.41921	2.78619	1.94517	1.88525	2.42424	2.49062	2.2667	1.7735	2.1816	1.37565	1.77692	1.63995	1.11101	1.93911	1.56336	0.948916	1.35561	0.80926	1.03793
EVM0011440	4.83377	4.54296	5.11244	4.82972	5.54244	4.24865	5.07082	4.95397	6.97932	7.36587	8.14854	7.49791	5.3562	5.45829	6.0056	5.6067	4.4123	4.90554	4.10874	4.47552	5.26276	5.27371	4.42365	4.98671	11.2164	12.8189	12.1262	12.0538	9.77829	11.4613	10.3137	10.5178	5.52346	6.7341	6.58521	6.28092	4.8875	4.71468	5.41442	5.00553
EVM0014556	19.5341	18.1951	20.368	19.3658	9.54655	9.57521	10.7137	9.94514	6.94818	6.63411	7.32625	6.96951	3.1782	3.0061	3.00876	3.06435	6.69869	7.20426	7.19238	7.03178	17.0355	15.3579	16.5945	16.3293	10.1334	10.3537	9.81969	10.1023	12.0926	12.0825	10.5024	11.5592	5.40958	5.23925	5.19942	5.28275	6.39773	6.71839	6.41681	6.51098
Salix_babylonica_newGene_10733	12.292	13.7167	11.6444	12.551	10.458	12.5363	11.9159	11.6367	11.0721	13.6542	11.1536	11.96	15.5032	13.6849	14.1303	14.4394	19.967	24.8692	19.9157	21.584	22.2196	26.2101	27.8186	25.4161	16.339	19.4156	18.8456	18.2001	26.2706	25.5621	27.1472	26.3266	30.1794	27.6476	27.2231	28.35	33.0825	29.0064	35.4553	32.5147
EVM0045088	12.9452	12.6826	11.967	12.5316	36.6416	40.3428	36.7903	37.9249	33.0307	35.8413	34.7456	34.5392	26.76	24.9158	26.9445	26.2067	15.6947	16.177	16.4408	16.1042	13.5962	12.0128	13.1544	12.9211	52.5662	51.4392	50.6153	51.5402	31.2075	26.6564	27.3459	28.4032	21.6051	21.3842	20.9191	21.3028	19.7563	22.3416	17.6309	19.9096
EVM0007469	1.92067	2.68003	2.74881	2.44983	4.41566	3.84061	2.63132	3.6292	6.71824	6.11473	6.69193	6.5083	2.26139	2.80144	2.52007	2.52763	2.3727	3.07538	3.22038	2.88949	2.02325	1.87971	2.73167	2.21154	3.95826	3.39917	3.62306	3.66016	6.96156	6.86133	6.50946	6.77745	2.81737	3.4667	3.6959	3.32666	2.38601	3.03171	3.49153	2.96975
EVM0034299	33.2047	30.3879	35.674	33.0889	23.4866	23.9019	24.6818	24.0234	32.8797	30.6132	33.2176	32.2368	45.383	45.3004	44.9132	45.1989	53.3157	51.6489	50.9486	51.9711	38.2064	35.2645	37.7863	37.0858	25.3105	24.7065	24.9176	24.9782	28.3933	28.418	28.6967	28.5026	35.9669	40.3013	36.488	37.5854	45.7547	45.4001	42.3868	44.5139
EVM0034296	0.644617	0.651629	0.68834	0.661529	0.484379	0.440017	0.324236	0.416211	0.836988	0.912879	0.735018	0.828295	0.225401	0.139062	0.227545	0.197336	0.543277	0.568985	0.452536	0.521599	0.398447	0.850346	1.05416	0.767651	0.921974	1.26653	0.429746	0.872749	0.545201	0.580616	0.48846	0.538092	0.815515	0.614283	0.277404	0.569067	0.328194	0.362964	0.367035	0.352731
EVM0050521	10.6995	10.4624	10.3319	10.4979	6.80352	7.37651	7.3478	7.17594	3.05104	3.34758	3.74353	3.38072	36.5286	34.7321	31.9356	34.3988	20.6764	20.7691	22.335	21.2602	10.043	13.2536	11.9267	11.7411	11.8346	11.3484	9.83585	11.0063	8.78539	6.6391	7.17089	7.53179	48.3345	45.6036	47.0496	46.9959	39.7485	40.4744	41.6552	40.626
Salix_babylonica_newGene_4111	1.74953	2.32244	1.62541	1.89913	1.28233	0.587468	0.820127	0.896642	1.70553	1.75715	1.01696	1.49321	3.23147	2.46169	2.72933	2.8075	2.81003	1.58962	1.78972	2.06312	0.968725	1.95778	1.62918	1.51856	0.629321	1.38195	0.598479	0.869917	0.473806	0.943461	0.942405	0.786557	1.57487	0.87815	1.35752	1.27018	2.10094	0.820719	1.55194	1.4912
EVM0034295	1.38522	1.52518	1.56236	1.49092	13.3598	12.739	12.9073	13.0021	2.06819	2.42742	3.33629	2.61063	1.1954	0.987861	0.770932	0.984732	0.905172	1.03678	1.22352	1.05516	1.60393	1.29593	1.41595	1.4386	4.21093	4.75451	3.72551	4.23032	4.38951	4.53098	4.10343	4.34131	0.59317	0.840592	0.804537	0.7461	1.18662	0.895569	1.19652	1.0929
EVM0034290	8.81664	7.93847	7.82459	8.19323	15.6402	15.3226	16.0742	15.679	14.3931	16.9251	15.8846	15.7343	18.4369	18.1479	18.364	18.3163	16.0582	14.9167	15.7727	15.5825	9.55771	9.87947	9.55563	9.66427	19.7195	23.1214	22.1769	21.6726	26.2509	24.3505	25.3285	25.31	28.8742	26.2872	26.4853	27.2156	25.4762	27.4072	27.4262	26.7699
EVM0034291	2.30432	2.79886	2.66917	2.59078	3.44459	2.46848	3.15204	3.0217	2.27411	2.02062	2.34308	2.2126	1.02848	1.15902	1.33681	1.17477	1.8241	1.75335	1.09218	1.55654	5.28534	4.10015	4.19273	4.52607	2.21539	1.70875	2.51624	2.14679	1.56772	1.88654	1.01451	1.48959	1.55665	2.40656	1.63911	1.86744	2.37561	2.22725	3.93301	2.84529
EVM0035529	1.00684	0.852229	0.962833	0.940634	1.27689	1.05253	1.04909	1.12617	1.76729	1.63515	1.09954	1.50066	1.93629	1.89336	2.02493	1.95153	1.4218	1.26202	1.39889	1.36091	2.24721	1.87576	2.11444	2.07913	1.72819	1.80418	1.68454	1.73897	1.60854	1.96343	2.13474	1.90224	2.53613	2.67223	2.35841	2.52226	2.61062	2.3094	2.8094	2.57647
EVM0035526	2.48639	2.29763	2.73568	2.50657	2.05514	1.8999	1.55239	1.83581	0.90759	1.21051	1.18616	1.10142	0.674314	1.34592	0.918831	0.979688	0.877338	1.15905	0.760594	0.932326	2.39226	2.48652	2.22301	2.36726	1.69891	2.19637	1.31243	1.7359	2.25667	1.87676	2.24903	2.12749	1.32179	0.944369	1.30054	1.1889	0.945135	1.93879	1.91658	1.60017
EVM0035525	14.0911	13.6675	14.0531	13.9372	20.0213	20.2042	20.4752	20.2336	16.1484	14.5229	16.4909	15.7208	9.57788	10.2203	9.81515	9.87111	10.4339	9.63408	9.35657	9.8082	3.44249	3.34493	3.28246	3.35663	4.26261	5.02862	4.97551	4.75558	4.64906	4.13246	4.9785	4.58667	2.03623	2.22302	1.77962	2.01296	2.28584	2.25477	2.26346	2.26802
EVM0035523	1.51855	1.80155	2.45545	1.92518	1.78548	0.756188	0.93207	1.15791	0.740696	0.622283	0.186002	0.516327	1.10096	0.931221	0.991412	1.00786	1.57711	1.72876	1.45964	1.5885	0.420418	0.177598	0.38006	0.326025	0.658338	0.871567	1.09905	0.876319	0.582118	0.540042	0.271115	0.464425	0.315487	0.147231	0.562312	0.341677	0.936131	1.35039	0.573817	0.953447
EVM0035521	24.7419	23.3256	19.4884	22.5187	19.2472	16.8798	15.7148	17.2806	20.931	20.287	21.7356	20.9845	38.0059	41.3066	39.4534	39.5887	66.7689	68.8594	74.6577	70.0953	51.0954	54.0437	54.1423	53.0938	13.665	13.0895	12.7591	13.1712	25.4496	25.619	22.5169	24.5285	55.0382	50.3303	49.6728	51.6804	58.8703	65.6294	54.9119	59.8038
EVM0022646	136.427	136.053	141.15	137.876	324.649	319.551	327.431	323.877	67.3845	71.4273	68.6746	69.1621	32.4922	33.5494	37.4098	34.4838	40.6212	38.9802	39.0965	39.566	132.429	125.741	133.234	130.468	262.815	242.221	248.271	251.102	68.8938	70.2402	69.3573	69.4971	93.7504	103.451	95.5538	97.5851	59.2687	61.9346	60.079	60.4274
EVM0022647	2.08328	1.28494	1.11638	1.49487	1.38829	0.886161	0.637991	0.970815	0.881084	1.01281	0.703417	0.865771	0.605738	0.390677	0.69378	0.563398	1.17267	1.23326	1.42455	1.27683	1.5878	1.85797	1.29362	1.5798	2.31083	0.927464	1.76139	1.66656	1.99464	1.88274	1.84383	1.90707	1.72222	1.62278	0.941348	1.42878	1.39209	1.30563	2.10129	1.59967
EVM0022644	95.533	96.8139	82.4729	91.6066	79.1725	73.3701	70.9038	74.4821	144.918	156.456	142.447	147.94	248.076	240.138	238.511	242.242	272.969	305.055	305.033	294.353	96.8629	100.289	103.315	100.156	67.2415	69.9366	68.5496	68.5759	140.081	134.756	138.607	137.815	173.025	166.095	159.887	166.336	205.866	197.573	200.548	201.329
EVM0022643	1.5329	0.812482	0.939087	1.09482	0.291833	0.079248	0.223143	0.198075	0.245388	0.112514	0.073438	0.14378	0.053571	0	0.176799	0.07679	0.189642	0.281561	0.104502	0.191902	1.39171	2.80072	1.42669	1.87304	0.290941	0.290538	0.445384	0.342288	0.282923	0.469134	0.826017	0.526025	0.226365	0	0	0.075455	0.313278	0.042666	0.042711	0.132885
EVM0045978	0.513737	0.989111	1.06768	0.856844	70.0012	73.5433	66.2302	69.9249	18.0293	18.4328	16.9606	17.8076	10.3727	13.4704	11.3101	11.7177	8.88786	5.75136	8.86059	7.83327	11.8617	13.2025	13.2752	12.7798	40.008	33.7005	43.4358	39.0481	4.17298	2.51086	3.78797	3.4906	13.5939	12.2857	14.4068	13.4288	6.59712	5.8643	7.62341	6.69494
EVM0024778	0.628397	1.28367	1.23219	1.04809	2.35285	1.79774	1.82051	1.99037	5.57174	3.46651	3.77461	4.27095	2.78388	2.4866	2.94544	2.73864	3.18425	3.28667	2.36619	2.9457	0.995905	1.38461	0.811925	1.06415	6.92431	6.57504	7.4848	6.99472	6.80121	7.64865	9.21595	7.8886	7.66421	7.90265	6.36686	7.31124	8.00368	7.39372	7.66406	7.68715
EVM0024772	2.22428	1.78836	3.36233	2.45832	1.69657	1.55748	1.54947	1.60117	1.79836	2.22916	2.36587	2.13113	4.45814	3.93833	4.14428	4.18025	4.48205	3.20207	3.63993	3.77468	5.12938	4.84403	6.99437	5.65592	12.1765	13.2471	13.8583	13.094	5.17475	6.25317	4.42378	5.2839	11.7618	12.2348	12.834	12.2769	10.9223	9.04229	8.53926	9.50127
EVM0014024	0.116444	0.108721	0.122359	0.115841	0.147481	0.044439	0.084478	0.0921327	0.12757	0.044432	0.173451	0.115151	0.255919	0.030525	0.134952	0.140465	0.067987	0.076647	0.108851	0.084495	0.087896	0.173074	0.190221	0.150397	0.17507	0.186754	0.232373	0.198066	0.411887	0.647539	0.502367	0.520598	0.776111	0.879125	0.60503	0.753422	0.701691	0.326353	0.284785	0.43761
EVM0024775	70.3947	78.0812	75.701	74.7256	91.4576	87.7689	94.3526	91.1931	50.5875	47.7864	47.681	48.685	63.252	69.1439	66.8414	66.4125	42.1312	44.119	48.1309	44.7937	67.5251	68.7934	67.017	67.7785	95.219	95.6797	96.2201	95.7063	43.8468	47.0213	47.5164	46.1282	116.918	114.293	118.855	116.689	63.3998	62.3586	63.5453	63.1013
EVM0024776	16.2566	18.0102	16.0277	16.7648	5.39716	5.62384	6.3335	5.78483	4.11444	4.77961	3.90291	4.26565	6.31802	5.41771	5.96472	5.90015	3.30535	3.42876	3.38922	3.37444	2.36823	1.88655	2.39314	2.21598	6.37172	5.94257	7.74446	6.68625	1.39239	1.40967	1.68628	1.49612	6.26868	6.20294	5.56652	6.01271	5.33928	3.74689	5.43551	4.84056
EVM0014149	2.12586	2.05037	1.30099	1.82574	0.713834	1.13586	0.917439	0.922377	0.706078	0.348137	0.69386	0.582692	1.62843	1.43658	1.15767	1.40756	1.48503	2.22923	1.98283	1.89903	17.9887	17.5152	17.813	17.7723	10.2168	10.6207	11.2766	10.7047	7.05018	6.65978	6.80677	6.83891	16.8698	18.1624	15.6929	16.9083	17.3728	21.4241	19.4429	19.4133
EVM0024780	2.73997	3.08575	3.05406	2.95992	2.37355	1.55385	2.42302	2.11681	2.06907	2.21167	1.18815	1.82296	1.73011	2.17429	1.2976	1.734	1.35057	1.28164	1.31991	1.31737	0.478863	0.368172	1.00716	0.618065	1.43966	0.763784	0	0.73448	0.955832	0.888496	0.50222	0.782183	0.93099	0.806123	1.32637	1.02116	1.05046	0.418073	0.270498	0.579678
EVM0034438	9.02599	10.9275	10.4141	10.1225	5.8403	7.98319	7.60094	7.14147	5.78029	4.18071	3.91125	4.62409	2.94188	3.28762	1.81231	2.6806	4.56694	4.89788	5.52962	4.99815	4.72715	6.08073	7.58514	6.13101	5.12434	4.76492	4.11535	4.6682	6.01279	6.34699	4.02002	5.45994	2.52397	3.6183	3.75687	3.29971	3.15176	2.89863	3.64548	3.23196
EVM0034430	4.65713	6.49563	4.84545	5.33273	6.9864	5.51434	5.73779	6.07951	4.44738	4.37287	6.01115	4.9438	11.2246	8.37333	9.65309	9.75035	13.2019	14.1502	10.4114	12.5878	2.05864	2.1151	1.81618	1.99664	4.18775	4.87257	3.2134	4.09124	2.23517	2.37785	2.05296	2.22199	5.53043	5.55114	6.52312	5.86823	6.58205	4.32681	5.06563	5.32483
EVM0034436	9.99394	9.04636	10.7615	9.93394	18.7399	17.5104	20.2808	18.8437	25.0234	22.7913	23.7886	23.8677	18.5602	17.5341	20.1194	18.7379	19.0165	19.0684	18.5169	18.8673	16.9982	15.7843	16.1132	16.2986	21.5724	23.0646	20.6233	21.7534	27.5681	26.9798	27.1951	27.2477	19.6114	24.0843	21.59	21.7619	21.5839	20.9482	18.815	20.449
EVM0007508	9.76951	11.2555	7.78583	9.60361	10.8682	9.24089	10.6108	10.24	12.6484	11.2339	12.9554	12.2792	24.3337	26.1239	22.2987	24.2521	28.3465	34.6947	34.4824	32.5079	20.6418	22.8633	19.8262	21.1104	9.97763	10.8999	9.16113	10.0129	11.365	12.0391	12.5033	11.9692	29.6726	26.2041	27.5594	27.812	27.2447	29.0287	31.051	29.1081
EVM0033801	4.83281	6.59666	5.15241	5.5273	4.14595	5.26704	4.79558	4.73619	7.29225	6.72919	6.99019	7.00388	6.20224	5.68054	6.3701	6.08429	5.94097	7.21991	7.03198	6.73096	1.66656	1.76826	2.32033	1.91838	1.1969	1.30899	1.37748	1.29446	2.11876	1.82298	1.44359	1.79511	1.55604	1.55268	1.63373	1.58082	1.59514	2.28006	1.95583	1.94368
EVM0033807	0.95969	0.575308	0.506723	0.680574	2.08596	1.13431	1.51072	1.577	0.065511	0.339466	0.349299	0.251425	1.76062	1.65487	1.60494	1.67348	0.619673	0.769544	0.534727	0.641315	0.192983	0	0.161515	0.118166	0.608233	0.360061	0.283903	0.417399	0.200423	0.120624	0.119104	0.146717	0.794698	0.648811	1.03111	0.824873	0.287696	0.566979	0.429013	0.427896
EVM0033808	2.40866	3.06881	3.47369	2.98372	1.93835	2.02845	1.98695	1.98458	1.62082	2.16456	1.83367	1.87302	0.388313	0.862353	0.543198	0.597955	1.6455	1.41929	1.47445	1.51308	3.13089	2.09981	3.0744	2.76837	1.81432	1.65542	1.51616	1.66197	1.83448	2.4579	2.35216	2.21485	1.29759	0.724287	1.32744	1.11644	1.47623	1.44202	0.992449	1.30357
EVM0014021	4.15503	3.58487	4.1889	3.97627	3.5243	3.31709	2.81274	3.21804	4.10112	3.62364	3.76464	3.8298	3.99243	4.46572	3.96563	4.14126	5.13624	4.18706	4.3269	4.55007	2.27093	2.2808	2.08521	2.21231	1.59794	1.44753	1.6174	1.55429	2.32511	1.80652	2.03411	2.05525	2.15042	2.58417	2.52918	2.42126	2.38888	2.22854	2.87849	2.49863
EVM0046878	1.84389	1.91719	1.90977	1.89028	4.63254	4.8471	4.95516	4.8116	15.6155	16.0093	16.1133	15.9127	8.06212	7.436	8.2713	7.92314	5.23381	6.12912	4.38925	5.25073	1.83756	2.41405	2.34721	2.19961	4.75545	4.72254	4.06151	4.51316	10.4199	9.47565	10.4091	10.1015	10.5656	11.6962	11.4464	11.2361	7.41741	6.11952	6.60002	6.71232
EVM0014020	1.16022	1.50521	1.37699	1.34747	1.29666	1.80504	1.48858	1.5301	0.784943	1.40503	0.575973	0.921983	0.806818	0.797104	0.717087	0.77367	0.598006	0.688434	1.10158	0.796008	2.73307	2.26888	2.18785	2.3966	3.44706	3.37517	3.53477	3.45233	2.03328	1.86134	2.09291	1.99585	1.00061	1.42918	1.31374	1.24785	2.13405	1.72469	1.40856	1.75577
EVM0041482	1.50399	1.356	0.94807	1.26935	1.61585	0.984844	1.18755	1.26275	2.20128	1.8395	1.9434	1.99473	1.83253	1.40377	1.4044	1.5469	2.18183	2.83946	2.75389	2.59173	0.807647	1.36191	0.776273	0.981943	0.420626	0.62108	0.855702	0.632469	1.65016	1.56236	1.30405	1.50552	0.933645	1.44362	1.09395	1.15707	1.10183	1.30091	1.53227	1.31167
EVM0023208	3.53679	3.31595	3.21859	3.35711	2.52331	2.86307	3.21373	2.86671	1.9856	1.80602	1.77341	1.85501	0.873207	0.921987	1.16707	0.987422	1.98272	1.45982	1.64776	1.69676	3.20413	3.35736	3.46323	3.34157	2.86209	2.38466	2.40168	2.54948	2.52936	2.39327	2.5305	2.48438	1.67699	1.97609	1.81096	1.82135	1.7384	1.84606	1.48184	1.68877
EVM0043317	5.73115	5.47229	6.52175	5.9084	3.41658	3.77893	2.33881	3.1781	7.16261	6.34198	7.02881	6.84447	7.79081	7.66434	6.84513	7.43343	7.52179	7.72232	11.6751	8.97306	5.76697	6.05567	7.09462	6.30576	2.56636	3.97835	3.39651	3.31374	4.3929	4.80102	6.11148	5.1018	6.18461	5.69838	6.37907	6.08735	8.61156	7.64867	6.93941	7.73321
EVM0023205	3.63216	3.65287	4.84879	4.04461	5.97939	6.1767	5.8614	6.00583	3.4099	3.61009	3.33207	3.45068	6.33481	6.23812	6.58607	6.38634	6.19459	6.48868	5.61618	6.09982	1.528	1.781	1.51329	1.60743	2.40765	3.44611	2.4035	2.75242	2.19552	2.60805	1.83614	2.21324	3.86599	3.56912	3.77917	3.73809	3.41034	3.73199	4.22108	3.78781
EVM0034322	0.599716	0.647817	0.758874	0.668802	8.04175	7.66539	7.84771	7.85161	10.7599	9.16752	7.20729	9.0449	13.1609	13.9126	13.7823	13.6186	10.9739	12.7315	11.431	11.7121	1.87929	2.05478	2.5815	2.17186	5.76243	5.41618	4.59477	5.2578	11.7134	11.6709	12.4095	11.9313	17.0707	14.5431	15.6837	15.7658	8.74867	8.65105	10.0705	9.15674
EVM0007504	7.52744	6.06804	6.50674	6.70074	4.89101	4.86335	3.57095	4.44177	2.50398	2.05453	2.84459	2.4677	1.65225	2.06161	0.987345	1.56707	1.59869	2.87555	2.56138	2.3452	10.1036	5.49001	6.77143	7.45503	2.30007	2.01997	1.85741	2.05915	1.1998	1.62401	1.72147	1.51509	1.02595	1.53475	0.903759	1.15482	3.64911	2.38679	2.93209	2.98933
EVM0055355	73.5465	74.9232	72.6752	73.715	138.829	131.301	135.646	135.258	49.2829	53.6642	49.1742	50.7071	57.3478	57.599	59.8401	58.2623	55.3815	55.3442	55.2751	55.3336	60.6515	58.3724	60.1487	59.7242	196.4	197.193	199.933	197.842	86.4158	88.1573	86.8149	87.1294	133.634	139.64	139.129	137.468	106.464	107.59	110.666	108.24
EVM0021789	12.9318	14.0681	11.8136	12.9378	5.9456	7.81929	7.93009	7.23166	8.72577	9.96194	10.7789	9.82221	14.102	14.6588	12.2209	13.6606	10.3193	13.1629	13.673	12.3851	32.0951	30.8481	35.7734	32.9055	23.16	24.9352	22.716	23.6038	35.1789	39.5514	37.03	37.2535	25.7776	22.3599	22.1228	23.4201	30.5721	26.1687	30.0224	28.921
EVM0000800	0.787016	0.544954	0.422462	0.584811	4.20022	4.71598	4.07687	4.33102	0.27921	1.1982	0.967686	0.815031	0.186953	0.606632	0.283819	0.359135	0.310583	0.174421	0.967368	0.484124	0	0.371689	0	0.123896	4.1349	3.95375	3.76257	3.9504	2.35458	2.38261	3.17128	2.63616	1.59558	0.570713	1.18742	1.11791	0.676624	0.793288	0.954959	0.80829
EVM0000801	31.0761	31.5736	37.0583	33.236	18.2388	17.4672	16.6112	17.4391	19.4233	19.3667	18.6249	19.1383	6.12649	7.39532	5.74665	6.42282	10.4001	11.747	9.21199	10.453	40.5224	42.217	41.4664	41.4019	15.487	15.0343	17.76	16.0938	14.3549	14.789	15.2945	14.8128	9.09715	10.2806	7.69665	9.0248	21.3204	18.6695	19.9295	19.9731
EVM0000802	16.2575	16.3486	16.1619	16.256	9.57975	9.35247	9.27804	9.40342	5.4881	6.74683	7.59652	6.61048	3.36879	2.70675	3.87877	3.3181	11.5396	9.25173	7.91279	9.56803	15.3856	16.6642	16.835	16.2949	7.02363	6.93435	7.73287	7.23028	7.10301	7.93036	7.47989	7.50442	6.20657	3.9317	5.03979	5.05935	8.72172	9.90278	6.87102	8.49851
EVM0000805	9.56272	9.16718	9.66629	9.4654	5.05587	5.04319	4.60093	4.89999	5.81214	8.87309	5.58027	6.75517	3.72958	5.05928	3.19804	3.99563	4.28209	3.92463	4.46587	4.2242	7.34719	7.58037	8.35847	7.76201	6.01318	6.03464	5.57179	5.8732	6.63837	5.29958	5.88987	5.94261	3.34061	3.77316	3.64555	3.58644	4.16507	3.82168	3.5576	3.84812
EVM0000809	0.928044	1.41156	1.32997	1.22319	0.408991	0.252927	0.296135	0.319351	0.7098	1.00729	0.799379	0.838823	1.15028	0.836748	1.18304	1.05669	0.902004	0.818577	0.988764	0.903115	0.565567	0.843303	0.723096	0.710655	0.767928	0.487459	0.44	0.565129	0.467424	0.341101	0.273168	0.360564	0.809688	0.856886	0.766338	0.810971	0.941121	0.581299	0.46573	0.662717
EVM0034495	275.037	259.041	264.359	266.146	450.917	461.374	445.176	452.489	230.84	232.088	238.012	233.647	94.4488	101.768	94.4816	96.8996	185.391	193.318	189.066	189.258	320.385	324.838	332.82	326.014	384.126	374.599	393.263	383.996	311.349	321.632	304.854	312.612	152.224	152.691	157.449	154.121	152.094	154.793	147.466	151.451
EVM0007507	128.551	138.424	127.54	131.505	165.185	160.034	157.516	160.912	136.742	141.58	138.797	139.04	115.931	114.566	111.086	113.861	99.0804	107.377	104.323	103.594	171.572	174.101	180.588	175.42	252.575	263.416	257.413	257.802	97.7852	102.137	110.56	103.494	138.66	128.423	127.297	131.46	102.717	101.994	102.097	102.269
EVM0041920	3.45384	2.89822	2.75762	3.03656	2.11804	1.4087	2.2782	1.93498	0.577661	0.953618	1.14464	0.891975	0.429	0.461123	0.37819	0.422771	1.34548	1.54445	1.60407	1.498	2.44734	2.07841	2.14864	2.2248	1.2843	1.27113	1.17707	1.24417	0.78889	1.46583	1.08233	1.11235	0.801542	0.555043	0.788873	0.715153	0.627812	0.968993	0.757601	0.784802
EVM0039950	0.835714	0.429977	0.529729	0.598473	6.06744	5.30151	5.43413	5.60103	16.543	16.7521	17.0838	16.793	15.0399	17.743	13.4971	15.4266	11.0412	10.6175	10.9839	10.8808	1.08795	1.1604	1.35863	1.20233	4.92372	5.09042	3.59858	4.53758	5.42725	4.69583	7.85305	5.99204	16.6907	19.3718	18.0735	18.0453	20.7313	20.815	19.0858	20.2107
EVM0039957	4.45716	3.88389	4.36273	4.2346	9.33528	10.7045	9.98754	10.0091	11.4067	12.449	12.5592	12.1383	12.3882	11.8476	10.7354	11.657	8.40418	7.97229	8.29211	8.22286	2.73283	2.91912	2.94734	2.86643	10.9806	11.977	10.554	11.1705	7.31666	7.67267	6.79978	7.26303	9.27893	9.86664	9.25851	9.46803	7.21607	9.43115	8.96588	8.5377
EVM0039954	0.979075	1.06168	0.569685	0.870146	0.086109	0	0	0.028703	0	0	0	0	5.04737	4.55523	4.4078	4.67013	4.48261	4.75993	3.80423	4.34893	0.337997	0	0.135777	0.157925	0.130872	0	0	0.043624	0	0	0	0	6.02618	3.68873	3.81534	4.51008	12.4212	10.1374	13.6969	12.0852
EVM0039955	4.04432	5.1864	5.05704	4.76259	3.54823	4.19137	3.73922	3.82627	1.79173	2.31332	2.19489	2.09998	1.69673	2.19626	1.65416	1.84905	3.18293	3.95836	3.65912	3.60014	3.43403	3.02958	3.34348	3.26903	2.95582	2.88662	2.60104	2.81449	2.03475	2.7825	1.99143	2.26956	2.25902	2.2768	2.29837	2.27807	2.40102	2.63222	2.48019	2.50447
EVM0015924	9.01777	9.78051	8.31938	9.03922	5.81867	5.53842	5.90172	5.75294	1.64474	1.70207	2.17131	1.83937	11.6904	12.1132	10.0764	11.2933	16.8248	14.816	18.5821	16.741	9.31108	10.4458	11.0231	10.26	6.42461	5.87346	6.14608	6.14805	1.6135	2.58281	2.15608	2.11746	11.3948	11.2743	11.6094	11.4262	11.43	10.0655	10.39	10.6285
EVM0015927	6.94876	5.32914	4.65707	5.64499	8.21414	10.0595	9.20745	9.16035	15.947	17.6869	17.5868	17.0736	17.2784	18.3015	20.4886	18.6895	13.9253	14.5085	14.977	14.4703	7.67187	6.45774	8.31652	7.48204	7.31707	9.84302	7.64524	8.26844	11.7185	10.0016	9.30787	10.3427	13.3296	13.6749	13.8378	13.6141	12.7845	11.9448	12.4244	12.3846
EVM0037279	1.91748	2.01698	1.91525	1.9499	2.22618	2.70274	2.1466	2.3585	5.19329	4.57786	4.274	4.68172	2.60488	3.17782	3.11481	2.96584	3.21597	2.50004	2.07819	2.59807	3.45105	3.4737	3.09786	3.34087	2.47405	2.6332	2.46201	2.52309	2.81215	3.0879	3.33547	3.07851	2.4886	2.71531	2.86059	2.68817	3.23483	2.73638	2.99923	2.99015
EVM0005064	1.74844	1.4479	1.83596	1.67743	0.576168	0.491197	0.363223	0.476863	0.469194	0.5581	0.526355	0.517883	0	0.261227	0.241482	0.16757	0.197588	0	0	0.0658627	0.13341	0.088182	0.138768	0.12012	0.351997	0.388266	0.398959	0.379741	0	0.204264	0	0.068088	0	0.128213	0	0.0427377	0.1882	0.031554	0.383393	0.201049
EVM0037276	60.7417	57.262	58.2141	58.7393	48.0809	47.3022	46.3083	47.2305	36.0108	35.8114	34.6675	35.4966	33.1472	30.1034	35.0144	32.755	30.6024	29.5064	31.2865	30.4651	126.807	126.108	124.801	125.905	103.472	100.95	95.6743	100.032	70.6399	71.7896	73.5755	72.0017	82.3617	84.1916	82.2619	82.9384	68.0732	69.0154	72.2299	69.7728
EVM0037273	15.192	15.2716	15.1046	15.1894	8.23753	7.00054	8.79427	8.01078	4.47258	4.20578	4.9233	4.53389	7.64291	8.0417	7.09285	7.59248	9.86411	8.80242	8.68086	9.1158	9.65573	7.94249	10.2622	9.2868	6.20765	5.42116	4.47838	5.36907	4.37005	4.03895	4.5685	4.32583	8.24662	7.4525	7.73045	7.80985	4.32179	6.48454	5.77614	5.52749
EVM0037272	2.85621	2.86824	3.17274	2.96573	1.7679	2.14259	2.29604	2.06884	2.18283	1.77765	2.30207	2.08752	1.0435	1.07573	1.10188	1.07371	1.9517	1.5217	1.42485	1.63275	3.79544	3.83248	3.48213	3.70335	2.58052	2.42705	2.35219	2.45325	2.95614	3.18123	2.92163	3.01967	1.7051	2.03572	1.53577	1.75887	1.94469	2.16871	2.7406	2.28467
EVM0030722	7.50547	7.33099	7.2093	7.34859	7.20626	8.18426	6.56973	7.32008	5.94308	6.35747	6.09248	6.13101	4.19747	4.19577	4.54853	4.31392	1.76889	3.05481	3.32216	2.71529	6.55766	4.91901	4.92513	5.46727	22.7976	25.152	20.9952	22.9816	14.5645	11.9693	12.4925	13.0088	14.0078	13.1444	16.5481	14.5668	14.6254	13.9267	14.2554	14.2692
EVM0030726	3.16992	3.61284	2.88855	3.22377	3.01593	4.26753	2.72277	3.33541	2.00037	1.95646	3.97947	2.64543	2.06323	2.05762	1.90748	2.00944	2.9187	2.4788	1.33923	2.24558	7.19931	8.39463	6.91471	7.50288	6.1734	6.56527	6.50025	6.41297	8.59252	8.93918	8.83211	8.78793	3.96622	3.96875	3.54891	3.82796	4.87611	7.06236	5.96361	5.96736
EVM0034490	30.3599	35.1927	32.5249	32.6925	26.7266	29.0842	25.1682	26.993	25.5019	27.5779	28.7341	27.2713	34.9689	32.2784	29.8195	32.3556	28.0373	27.3143	30.7582	28.7033	11.729	14.4767	15.5364	13.914	16.1247	12.9332	14.5695	14.5425	12.997	13.3984	13.1388	13.1781	19.1326	19.6143	17.1289	18.6253	18.5124	15.8202	15.885	16.7392
EVM0005062	6.87791	6.07899	6.17577	6.37756	4.65957	5.80298	6.08375	5.51543	5.00657	6.34805	6.25019	5.86827	6.98941	6.22901	6.34901	6.52247	11.3612	9.86394	9.37495	10.2	2.44061	3.3836	2.52849	2.78423	1.20277	1.79996	1.9418	1.64818	4.87077	4.38888	4.21922	4.49296	3.36139	3.77977	3.20939	3.45018	3.9475	3.36951	3.73072	3.68258
EVM0026399	0.93065	0.483721	1.13719	0.85052	3.75031	3.89944	2.51105	3.38694	0.531489	0.651845	0.690414	0.624583	1.1967	0.993988	0.633099	0.941261	1.28896	1.24764	0.983289	1.1733	0.38199	0.418137	0.482644	0.42759	0.514338	0.446999	0.536411	0.499249	0.807051	0.729239	1.16753	0.901272	1.28446	1.43655	1.18178	1.30093	1.28737	0.510192	1.22727	1.00828
EVM0032383	4.23465	3.11642	3.47515	3.60874	1.86456	1.00012	2.07911	1.64793	0.778544	0.676393	1.68827	1.04774	1.0194	1.87948	1.71028	1.53639	1.14585	1.94158	2.39445	1.82729	1.87641	2.14236	1.22995	1.74957	3.90446	3.97393	2.55866	3.47902	2.48323	2.79091	2.51659	2.59691	2.98138	2.15011	3.23573	2.78908	4.45243	3.11481	2.59461	3.38728
EVM0032386	1.78171	3.43195	2.99405	2.7359	4.07357	4.31758	3.6372	4.00945	9.5425	10.0003	10.0546	9.86582	9.44556	6.29297	6.53078	7.4231	4.81534	3.72991	4.85305	4.4661	2.86436	2.81124	3.21449	2.96336	4.27768	4.47232	5.62642	4.79214	9.45762	7.66111	8.67356	8.59743	3.11017	2.75942	3.54445	3.13801	3.65275	3.97372	3.5908	3.73909
EVM0032387	2.65729	3.1255	2.08627	2.62302	1.70427	3.13491	4.79657	3.21192	3.00784	1.53833	2.57806	2.37474	4.68748	5.09488	8.94932	6.24389	5.68897	6.33387	4.01585	5.34623	0.776328	1.0718	0.898479	0.915537	0.942223	0.708393	1.79269	1.14777	2.88461	2.29182	0.185959	1.78746	1.74018	1.24436	1.97735	1.65396	2.75386	2.10275	1.44039	2.099
EVM0032385	10.4269	10.6415	11.2328	10.7671	10.4925	10.3011	11.166	10.6532	11.0773	11.3083	10.111	10.8322	9.31888	11.1841	9.11766	9.87355	6.53257	6.40879	8.70185	7.2144	9.40167	8.50327	8.07307	8.65934	4.4935	5.15648	4.64335	4.76444	2.97612	4.03751	4.52091	3.84485	3.45116	3.21281	3.13545	3.26647	3.60593	4.24074	3.76637	3.87101
EVM0032388	4.65871	4.57759	5.62444	4.95358	6.02359	6.00033	6.96252	6.32882	3.86376	4.50346	4.1056	4.15761	3.37978	4.02014	4.32565	3.90852	3.93258	4.01315	4.47642	4.14072	2.3601	2.31441	2.81108	2.4952	2.14395	1.80264	2.20227	2.04962	2.26566	2.88565	2.26	2.47044	1.25544	1.98694	1.62052	1.62097	1.46206	1.5165	1.77367	1.58408
EVM0032389	5.94314	6.59837	5.25148	5.931	6.98032	6.79343	6.57639	6.78338	11.9986	14.3719	13.7687	13.3798	15.5792	14.7092	12.6972	14.3285	11.5196	13.5417	14.9831	13.3482	6.3907	6.56728	7.72047	6.89282	9.32656	7.87868	6.37962	7.86162	13.126	11.7113	13.8929	12.9101	16.2529	11.2698	13.767	13.7632	12.4719	11.1248	13.9743	12.5237
EVM0045385	2.9795	3.48163	2.76304	3.07472	1.82237	1.91545	2.18598	1.9746	1.68379	1.88318	1.92357	1.83018	2.38721	1.64516	1.3634	1.79859	1.7027	0.928978	1.99544	1.54237	2.19287	2.58853	2.73115	2.50418	5.4611	5.19493	5.63605	5.43069	6.3502	4.60241	4.95524	5.30262	4.18393	7.00839	4.332	5.17477	10.8882	8.38201	8.94032	9.40351
EVM0045386	0.071417	0	0	0.0238057	0.307771	0.464226	0.31906	0.363686	0	0	0.05445	0.01815	0	0	0	0	0	0	0	0	0	0	0	0	6.66849	4.50955	6.99446	6.0575	0	0.094195	0.553472	0.215889	0	0.081133	0	0.0270443	0	0.165338	0	0.0551127
EVM0045382	5.38258	4.33631	4.38584	4.70158	3.03189	3.38389	3.58215	3.33264	5.02678	3.91635	5.17436	4.70583	5.65563	7.34	7.08696	6.6942	6.86953	7.0228	6.973	6.95511	8.52837	8.73635	8.28177	8.5155	4.49334	4.7093	6.07164	5.09143	6.19613	6.69912	6.99523	6.63016	7.26753	7.24815	7.26419	7.25996	8.60564	7.86586	9.94688	8.80613
EVM0049441	6.80594	7.15533	7.42681	7.12936	5.19094	5.21216	5.55447	5.31919	9.30745	9.66922	10.1331	9.70326	14.5835	16.2149	15.5249	15.4411	18.0154	16.3312	18.9502	17.7656	8.83249	8.72572	7.13073	8.22965	6.4624	6.13994	5.91494	6.17243	8.92617	9.66043	8.93745	9.17469	11.4308	11.1884	11.855	11.4914	12.9598	16.8696	15.5454	15.1249
EVM0044475	1.80618	1.42817	1.022	1.41878	1.39652	1.04766	1.50613	1.31677	0.665949	1.2993	0.794759	0.920002	0.310744	1.12727	1.20417	0.880731	1.0394	1.15559	0.905854	1.03361	1.16623	0.468151	0.658711	0.764365	1.63392	1.77165	1.64729	1.68429	1.07397	0.429601	0.487499	0.663691	1.16719	1.2448	0.860108	1.0907	1.56079	1.07926	0.469979	1.03668
EVM0044477	0.67699	0.522915	0.206079	0.468661	7.03729	8.30154	6.85963	7.39949	2.06262	3.205	2.43445	2.56736	0.363	0.251435	0	0.204812	0.302096	0.627399	0.437961	0.455819	0.70107	0.604332	0.72727	0.677557	11.5558	12.5629	10.219	11.4459	9.32848	10.0669	9.81229	9.7359	1.20682	0.725608	0.144277	0.692234	1.32507	1.52824	2.06635	1.63989
EVM0044473	6.01276	7.35393	6.82897	6.73189	3.83551	5.03387	3.43999	4.10312	2.34704	3.71028	3.14362	3.06698	2.43059	2.17819	2.34657	2.31845	2.28024	2.20118	2.12374	2.20172	5.60184	5.73563	5.48662	5.60803	3.11331	2.98972	3.70682	3.26995	2.85074	2.01318	2.08698	2.31697	1.97067	1.70941	2.40192	2.02734	2.67797	2.38592	1.62801	2.23063
EVM0044472	1.80248	2.33231	2.23046	2.12175	4.85619	5.78134	5.23223	5.28992	3.53766	5.23825	4.95352	4.57647	2.58953	2.98896	2.43273	2.67041	3.20166	3.25166	3.09176	3.18169	1.71019	2.03827	2.33682	2.02843	2.97872	3.08644	3.39273	3.15263	3.89976	3.52261	2.99204	3.47147	3.29779	2.10106	3.17065	2.8565	2.69515	1.50507	2.20062	2.13361
EVM0049447	4.19561	4.09612	3.54568	3.9458	1.1256	1.67746	1.62603	1.47636	2.58576	2.15126	2.88612	2.54104	3.99353	3.03206	3.77231	3.5993	1.80603	2.69382	2.25171	2.25052	3.10783	3.04576	2.43167	2.86175	1.15823	1.84462	1.81809	1.60698	1.45601	1.37528	0.533228	1.1215	1.75929	1.52146	1.93908	1.73994	1.51842	0.966072	0.968559	1.15102
EVM0017715	4.18104	3.25836	5.81388	4.41776	2.96607	3.43636	2.3931	2.93184	1.77824	3.19136	2.7027	2.55744	1.18601	1.48537	0.780484	1.15062	2.02742	2.08215	1.89379	2.00112	4.38148	3.40342	4.0918	3.9589	3.31088	3.40736	2.49648	3.07157	2.54591	3.158	2.53366	2.74586	1.73038	1.97443	1.7474	1.8174	1.01643	2.09117	1.58474	1.56411
EVM0049445	34.6984	33.5252	34.1486	34.1241	25.5157	24.7403	24.5786	24.9449	46.3358	49.8095	53.4421	49.8625	67.3973	66.9501	67.3531	67.2335	48.9019	46.8968	48.3267	48.0418	32.5646	33.3391	34.9188	33.6075	23.7378	22.2273	21.6202	22.5284	32.4833	30.2189	31.564	31.4221	42.5122	43.3178	42.355	42.7284	39.611	38.442	38.3628	38.8052
EVM0003655	1.35651	1.50155	1.58382	1.48063	1.98593	0.922922	2.01314	1.64067	2.71821	2.13301	3.85691	2.90271	1.29758	1.72433	1.45231	1.49141	1.02818	1.56855	1.24409	1.28028	1.07188	1.36921	1.0903	1.17713	1.26494	1.06251	1.17521	1.16755	1.67551	0.954064	1.924	1.51786	0.897722	1.00069	1.30117	1.06653	1.09793	0.943391	0.881348	0.974224
EVM0000375	0	0.177024	0.467757	0.214927	0.492952	0.628143	0.437366	0.519487	0.764543	0.932505	1.04452	0.913855	0.191806	0.167997	0.196747	0.185517	0.341791	0.264782	0	0.202191	2.65454	3.80786	2.15441	2.87227	5.06691	5.43093	4.13336	4.87707	0.230302	0.727747	0.096618	0.351556	0.857385	1.3586	1.33208	1.18269	0.183835	0.189019	0.519442	0.297432
EVM0000370	2.78536	3.6943	4.05119	3.51028	1.4027	1.73203	2.21811	1.78428	1.68565	1.45035	1.06279	1.3996	1.36531	1.10853	1.3252	1.26635	0.85484	0.906895	1.2553	1.00568	2.75735	2.1351	1.39098	2.09448	1.00283	0.60519	0.938011	0.848677	0.786404	0.255267	0.430986	0.490886	0.894138	0.63049	0.806672	0.7771	0.538703	1.36599	1.37639	1.09369
EVM0000371	6.33542	7.41303	6.26026	6.66957	3.34214	3.30455	4.098	3.58156	3.90063	4.64005	3.86784	4.13617	3.88135	2.79938	3.27001	3.31691	4.96472	4.43244	5.02308	4.80675	7.21477	5.67699	5.74259	6.21145	2.98626	3.3062	3.89682	3.39643	6.05672	4.52783	4.75557	5.11337	2.41902	3.78234	1.50428	2.56855	3.75385	4.07434	3.40398	3.74406
EVM0037490	5.09732	6.02511	5.08236	5.40159	1.5671	2.54551	1.86014	1.99092	4.75711	3.5424	4.01929	4.10627	4.4568	3.94057	3.31263	3.90333	3.18267	4.0316	3.45001	3.55476	6.56252	5.81935	4.97109	5.78432	2.70019	2.5394	3.62153	2.95371	5.41282	6.74418	4.06924	5.40875	2.78813	3.40866	3.86831	3.35503	3.88993	3.50492	3.69657	3.69714
EVM0037495	21.5935	24.7852	19.9427	22.1071	7.02782	5.75502	6.9381	6.57365	4.58859	4.75658	4.99876	4.78131	4.95188	5.03556	4.58834	4.85859	6.63517	6.95372	6.47571	6.6882	13.3908	13.1187	13.4477	13.3191	11.9296	16.2202	13.8498	13.9999	14.1655	13.6546	16.9554	14.9252	6.97448	7.6619	7.50177	7.37939	9.85764	8.12151	7.75526	8.57814
EVM0031701	1.11343	0.304618	0.42191	0.613319	0.100247	2.95321	0.749342	1.2676	1.4144	1.49447	0.220843	1.04324	1.01938	0.976249	1.43716	1.14426	0	0.959073	0.749295	0.569456	0	0	0	0	0	0	0	0	0	0.035438	0	0.0118127	0	0	0	0	0	0	0	0
EVM0000378	0.326828	0.289632	0.414035	0.343498	0.564604	0.327376	0.052327	0.314769	1.87168	2.25484	2.48175	2.20275	1.26515	0.919908	1.72465	1.30324	0.701351	1.24009	1.54235	1.16127	0.611101	0.520229	0.603174	0.578168	0.644508	0.527139	0.628801	0.600149	0.65572	1.28372	1.93421	1.29122	1.25077	0.901538	1.07986	1.07739	1.25898	1.46012	1.29632	1.33847
EVM0033381	3.4926	3.55566	3.21288	3.42038	1.80842	2.83052	2.29222	2.31039	3.19946	3.83881	3.81623	3.61817	3.88125	3.54553	4.22086	3.88255	4.51645	5.49462	4.56996	4.86034	3.4847	3.23318	4.21102	3.64297	1.79841	1.24618	1.67468	1.57309	3.39287	3.5666	4.46702	3.80883	3.81277	3.4293	2.82306	3.35504	3.76283	3.46317	3.7244	3.65013
EVM0033385	1.2787	0.879514	0.770973	0.976394	2.05994	2.29928	2.23397	2.19773	2.65724	2.51533	2.18929	2.45396	1.29939	0.893484	0.802781	0.998552	0.848164	0.683344	0.801291	0.7776	0.86875	1.24766	0.861765	0.992724	3.85418	3.3573	3.92195	3.71114	2.42105	2.08599	2.12091	2.20932	0.973069	0.727919	0.717731	0.80624	0.744382	1.23958	0.901842	0.961933
EVM0033387	1.64915	1.97333	1.05762	1.56003	2.11628	1.0087	1.41966	1.51488	1.82182	1.9414	2.41365	2.05896	2.30623	2.74493	3.95707	3.00274	1.68659	1.49039	1.73911	1.6387	1.8407	1.65136	1.50974	1.66727	1.71109	1.28837	1.54853	1.51599	0.987336	1.52704	1.19735	1.23724	1.43306	1.8173	1.72389	1.65809	2.36094	2.18423	1.89553	2.1469
EVM0051924	19.1307	19.9072	18.0465	19.0281	6.62278	5.42041	6.11028	6.05116	5.8037	3.92084	5.51306	5.0792	10.3069	8.88897	9.98852	9.72814	4.85797	4.63623	4.24691	4.58037	10.6365	11.636	11.6542	11.3089	8.86856	9.31641	10.4623	9.54909	4.00112	4.70388	3.36574	4.02358	6.58382	6.15869	6.07721	6.27324	9.25898	7.32691	9.83469	8.80686
EVM0051927	7.63917	7.69923	7.11076	7.48305	9.15451	7.74772	7.68278	8.195	20.4015	23.9512	22.1331	22.1619	56.2379	53.3057	53.7481	54.4306	49.1625	50.8776	53.5331	51.1911	28.3466	26.8478	26.6723	27.2889	10.7986	13.878	14.095	12.9239	36.8916	38.1053	37.4567	37.4845	52.8947	52.7236	51.1227	52.247	53.1229	53.0457	51.042	52.4035
EVM0051926	1.30293	1.46904	1.86962	1.5472	2.10503	2.33121	1.88011	2.10545	2.22551	2.55058	1.66221	2.1461	2.5448	3.64447	3.57645	3.25524	2.07618	2.71619	1.56177	2.11805	1.64598	1.33986	1.6671	1.55098	2.24197	3.22999	2.08075	2.51757	1.57523	1.85394	1.6864	1.70519	3.05199	2.93729	4.44573	3.47834	3.07238	2.00052	2.53944	2.53744
EVM0031893	0.404742	0.317665	0.766259	0.496222	0.345549	0.489345	0	0.278298	0	0.482308	0.124443	0.20225	0.082403	0.096765	0	0.0597227	0.113016	0	0.189281	0.100766	1.66241	1.4404	1.28529	1.4627	0.904347	0.686167	0.448095	0.679536	0.117807	0.243173	0.388327	0.249769	0.147695	0.260045	0.211443	0.206394	0.191836	0.265042	0.445864	0.300914
EVM0031895	4.94771	5.81976	3.95823	4.90857	5.94699	4.54981	3.65314	4.71665	4.87798	2.62535	3.59797	3.70043	2.45191	2.33331	0.773419	1.85288	1.58979	3.41989	2.70719	2.57229	7.84086	8.81943	6.29862	7.65297	5.79493	7.74282	6.80439	6.78071	4.36314	6.17177	5.50096	5.34529	3.67093	3.25212	2.22663	3.0499	3.01137	3.35941	4.19833	3.52304
EVM0031894	6.622	6.35	7.33524	6.76908	7.86263	9.0176	8.38594	8.42206	4.39511	4.30232	4.06639	4.25461	6.19604	6.40511	6.24716	6.28277	4.68386	4.34773	4.59697	4.54286	3.95307	3.8326	3.84879	3.87816	7.17103	8.10338	7.51023	7.59488	2.4447	2.55348	2.07519	2.35779	5.71302	5.32791	6.66486	5.90193	4.95768	5.52466	4.88693	5.12309
EVM0031899	8.87011	9.59551	8.90201	9.12254	14.8937	14.2602	14.913	14.689	6.68868	7.13358	6.97512	6.93246	5.40555	6.05003	6.08252	5.84603	4.96691	5.06497	5.65368	5.22852	4.47151	4.4845	4.36701	4.44101	19.7389	18.9663	20.2101	19.6385	4.63293	4.82449	4.72211	4.72651	5.26271	6.71689	5.92583	5.96847	5.30154	5.65112	5.24019	5.39762
EVM0031898	12.7517	17.0871	13.3197	14.3862	16.0145	16.1565	14.1495	15.4401	9.66666	10.5971	9.21262	9.82546	3.96806	3.58222	4.49327	4.01452	5.74903	5.08354	6.26557	5.69938	6.41208	5.5644	4.3955	5.45733	4.77182	4.64738	4.42576	4.61499	3.18454	4.2731	4.54508	4.00091	1.56083	1.71975	2.0359	1.77216	2.67179	2.4079	2.17067	2.41679
EVM0034494	2.93034	2.94552	2.7463	2.87405	4.6556	4.31087	3.87768	4.28138	4.76966	4.38402	5.13819	4.76396	1.80832	2.18217	2.16522	2.0519	2.38385	2.36441	2.65723	2.4685	4.47908	4.31951	4.1734	4.324	5.66738	4.94058	4.81643	5.14146	7.33207	6.6382	5.84557	6.60528	2.5422	3.24813	2.78721	2.85918	3.44997	3.22075	3.74474	3.47182
EVM0009513	7.0152	6.34851	6.76195	6.70855	4.28127	3.74122	4.90405	4.30885	3.52198	3.88929	2.81513	3.4088	3.3881	2.67067	2.98624	3.015	4.49337	5.2245	4.34572	4.68786	5.19235	4.93431	5.77982	5.30216	2.2929	1.96007	2.31197	2.18831	3.19828	2.42298	1.81053	2.47726	2.01518	2.00906	2.15704	2.06043	3.2478	2.62911	3.48743	3.12145
EVM0033030	16.5167	15.2789	15.8977	15.8977	18.3751	18.148	18.9352	18.4861	27.5302	27.2361	28.5803	27.7822	40.4505	42.3017	44.4333	42.3952	39.1445	40.7745	40.9743	40.2978	19.7276	21.2521	21.0222	20.6673	23.2492	21.3983	22.33	22.3258	30.347	30.0097	28.0378	29.4648	42.1834	41.7532	40.837	41.5912	40.6577	37.1605	36.8156	38.2113
EVM0009517	2.80611	3.03278	3.63713	3.15867	11.9074	10.9549	12.3374	11.7332	4.63188	4.33945	4.87826	4.61653	6.73095	7.09131	7.46769	7.09665	4.40774	4.05144	4.10469	4.18796	3.30627	3.48999	3.35918	3.38515	14.0211	13.68	13.7619	13.821	5.45929	5.27982	5.81549	5.5182	7.51574	8.69119	8.67109	8.29267	6.24876	6.75147	6.36571	6.45531
EVM0033039	4.46769	4.5075	4.45247	4.47589	6.74193	5.83901	6.77385	6.4516	9.45473	7.63221	9.06682	8.71792	6.05447	5.93064	6.87515	6.28675	7.69435	7.9957	6.54493	7.41166	4.79	5.5245	5.19566	5.17005	4.66705	4.89617	4.57777	4.71366	8.08646	8.28788	7.19793	7.85742	4.39727	4.86894	4.46302	4.57641	5.19585	4.83963	5.27697	5.10415
Salix_babylonica_newGene_3076	1.49721	2.34446	1.63497	1.82555	1.84817	2.17459	1.94134	1.98804	1.30836	1.1504	0.863345	1.10737	1.34563	1.57926	2.0884	1.6711	1.96175	1.84108	2.75352	2.18545	1.91062	1.13804	1.11619	1.38829	0.658926	0.338065	0.682675	0.559889	0.819631	0.663168	1.16822	0.883674	1.78187	0.700578	0.732729	1.07173	0.571665	0.608854	0.900957	0.693825
EVM0007725	4.32098	4.47954	5.66815	4.82289	7.01484	6.35621	7.45095	6.94067	5.25575	5.15867	4.12873	4.84772	4.08258	4.46518	4.03741	4.19506	5.17218	3.87766	4.50859	4.51948	0.279667	0.475926	0.248067	0.334553	0.91115	0.436595	0.845053	0.730933	1.12402	1.52031	1.60925	1.41786	0.343195	0.866666	0.742655	0.650839	0.890727	0.485566	0.791156	0.722483
EVM0003777	25.8044	23.3438	23.6424	24.2635	9.13842	8.53331	7.8052	8.49231	6.7027	8.38307	8.94542	8.0104	10.0668	13.3375	9.72517	11.0432	13.783	14.9906	15.408	14.7272	23.0557	20.6588	25.4828	23.0658	8.30226	9.26662	7.86686	8.47858	6.91664	7.68977	7.34629	7.31757	11.6293	13.1915	13.2601	12.6936	11.075	12.3823	11.2844	11.5806
EVM0003776	11.2698	10.3862	11.292	10.9827	28.6315	28.5958	29.6393	28.9555	69.9684	55.7735	72.31	66.0173	108.745	106.483	115.334	110.187	100.474	101.819	112.86	105.051	12.9451	13.9326	11.8665	12.9147	31.7709	30.746	33.2855	31.9342	45.9039	41.9176	44.4131	44.0782	84.9386	85.5041	83.6291	84.6906	83.3484	81.0438	85.8218	83.4047
EVM0003773	5.2942	5.60102	5.01227	5.3025	3.44656	2.62773	2.4635	2.84593	2.03494	2.739	2.80666	2.52687	2.25341	1.96771	1.97342	2.06485	2.9167	2.82666	2.38192	2.70843	5.23871	6.85517	6.04151	6.04513	1.44853	2.69317	2.47979	2.20716	2.39354	2.50739	1.97211	2.29101	2.05562	1.97993	2.01887	2.01814	3.31969	2.83596	3.0186	3.05808
EVM0007726	0.215553	0.368443	0.164125	0.249374	0.075989	0.178594	0.274645	0.176409	0.997209	0.652463	0.826192	0.825288	0.844003	1.03312	0.504738	0.793952	0.890722	1.41628	1.10439	1.13713	0.380891	0.868634	0.33752	0.529015	0.547283	0.478441	0.415445	0.48039	0.801912	0.666844	1.04077	0.83651	0.948096	1.18597	1.69108	1.27505	2.04788	1.77424	1.8575	1.8932
EVM0003771	17.9203	20.2975	21.5878	19.9352	13.4616	11.4787	10.2964	11.7456	8.89604	7.08934	8.59743	8.19427	5.67781	4.40454	3.16901	4.41712	17.7621	15.9618	19.8563	17.8601	9.25478	10.3863	8.05959	9.23356	5.08719	5.99524	5.81032	5.63092	6.17534	6.11853	5.44401	5.91263	1.658	1.28113	1.63793	1.52569	3.70255	2.46833	3.09666	3.08918
EVM0003770	1.92958	1.72279	2.87626	2.17621	1.54774	1.37356	2.76782	1.89637	0.445205	0.331037	0.285219	0.35382	1.0787	0.417318	0.331548	0.609189	0.888628	1.43335	2.19921	1.50706	3.36611	2.55373	2.99506	2.97163	2.80848	3.11151	2.47333	2.79777	2.97761	2.00438	2.267	2.41633	1.77244	2.15403	2.82522	2.25056	2.7179	2.09973	2.97596	2.59786
EVM0007727	4.27	3.24848	4.17106	3.89651	3.04922	2.93258	3.11078	3.03086	2.29111	2.43473	1.87005	2.19863	0.467336	0.767293	0.471481	0.568703	0.988771	1.51809	0.691053	1.06597	2.45402	2.84009	2.43523	2.57645	2.42785	3.09599	2.10253	2.54213	1.5075	2.78049	1.38919	1.89239	0.809998	1.08418	1.47435	1.12284	1.51047	1.0691	0.903026	1.16087
EVM0007066	2.31171	2.70339	2.77671	2.59727	1.41456	1.89983	2.48423	1.93287	2.58317	2.94232	2.5337	2.6864	3.60695	3.40023	4.0186	3.67526	3.82321	3.7697	3.95015	3.84769	4.20629	3.71293	4.06967	3.99629	2.97109	3.21181	2.35421	2.8457	4.45166	4.81825	4.57843	4.61611	5.54672	6.05056	5.0567	5.55133	4.98526	5.85155	5.10337	5.31339
EVM0007062	12.1066	13.7647	13.6749	13.1821	8.24889	8.77208	8.52188	8.51429	8.9769	8.34249	9.19682	8.83873	3.89011	5.4798	4.91954	4.76315	6.66537	7.83466	7.9974	7.49914	15.826	15.547	15.6114	15.6615	7.69905	7.99481	8.88508	8.19298	11.9943	13.2369	12.7216	12.6509	6.01638	6.00026	5.65122	5.88929	9.82875	6.81422	7.85987	8.16761
EVM0034591	3.41903	3.57179	5.13262	4.04115	6.03483	6.94141	6.0098	6.32868	10.5607	14.4553	14.0291	13.015	8.15911	8.58451	8.27131	8.33831	6.83984	4.96203	6.47026	6.09071	12.6316	11.0542	12.2624	11.9827	12.5416	15.7534	15.7043	14.6664	3.86612	3.81243	2.8205	3.49968	11.14	11.3913	13.8908	12.1407	8.14385	8.11743	7.04816	7.76981
EVM0044680	4.27846	3.97804	3.06609	3.7742	4.41789	4.77058	4.40262	4.53036	6.12145	6.12188	5.29499	5.84611	3.94539	3.18383	2.40404	3.17775	3.32549	3.47092	4.09247	3.62963	3.84261	4.26805	2.58599	3.56555	6.35253	5.4172	5.86811	5.87928	8.43455	7.74836	7.44747	7.87679	5.3859	3.42936	4.83091	4.54873	3.99557	4.25089	4.16944	4.13863
EVM0007069	0.968999	0.962968	1.07427	1.00208	1.18689	0.825734	0.385844	0.79949	0.760101	0.625096	0.860606	0.748601	0.465915	0.73512	0.367639	0.522891	0.788295	0.98039	1.35238	1.04036	0	0	0	0	0	0	0	0	0	0	0	0	0	0	0	0	0	0	0	0
EVM0007068	7.10747	7.82219	8.09493	7.67487	4.68402	5.78467	6.1581	5.54226	2.3301	1.812	1.86452	2.00221	2.32103	1.77375	2.28551	2.12676	3.63353	4.04858	3.24873	3.64362	3.98324	4.60276	3.45694	4.01431	3.8155	4.02147	4.17347	4.00348	2.89216	2.39414	2.61889	2.63506	2.54449	2.19673	1.96552	2.23558	2.36065	2.39584	2.23351	2.33
EVM0048150	0	0	0	0	0	0	0.036584	0.0121947	0.043273	0.150855	0	0.0647093	0	0	0	0	0	0	0	0	1.79414	1.6969	1.02809	1.50637	1.34795	0.859107	0.850549	1.0192	1.68399	0.484807	0.740945	0.969915	1.20666	0.825555	0.785804	0.93934	1.25451	0.998753	1.32684	1.19337
EVM0048157	1.54711	1.25675	1.79112	1.53166	1.13285	1.18607	0.868849	1.06259	0.856851	1.10654	0.887067	0.950151	0.175118	0.370623	0.409198	0.318313	0.272185	0.29083	0.789661	0.450892	1.00727	1.87338	1.17336	1.35133	0.94841	0.878461	1.27436	1.03374	1.18557	1.08737	1.83346	1.3688	0.694178	0.497263	0.451774	0.547738	0.410746	0.561567	0.807027	0.593113
Salix_babylonica_newGene_1943	0.633444	1.34652	0.750169	0.910045	0.595331	0.784242	0.914397	0.764657	1.57658	1.90851	3.25664	2.24724	3.49336	4.5675	4.40304	4.15463	2.11267	1.81635	2.24266	2.05722	1.16644	1.36569	1.27751	1.26988	1.3621	0.914955	1.41201	1.22969	1.30391	1.20452	1.87958	1.46267	3.2671	3.66094	2.66708	3.19837	3.17474	3.42713	3.1588	3.25356
EVM0052773	6.56571	8.548	7.0144	7.37604	2.47432	3.03082	3.74216	3.08244	1.06212	1.47315	1.15729	1.23085	15.8554	14.3773	14.8239	15.0189	15.9911	15.7342	18.6239	16.7831	8.08519	8.40985	9.40982	8.63495	3.15444	3.75865	3.9314	3.61483	2.01218	1.48207	1.98126	1.82517	15.3047	14.1507	13.0629	14.1728	19.1413	19.0721	18.1419	18.7851
EVM0038338	1.83509	2.02871	1.69095	1.85158	0.962473	0.51592	0.514615	0.664336	0.744434	0.202784	1.40904	0.785418	0.328619	0.936516	0.241414	0.502183	0.529486	0.92355	0.267019	0.573352	4.50712	4.54186	2.88252	3.97717	2.05676	1.93627	1.68441	1.89248	1.36178	1.43578	2.24138	1.67965	1.57436	1.14036	1.32184	1.34552	1.64765	2.03363	2.08117	1.92082
Salix_babylonica_newGene_6895	0.813057	1.49885	1.29739	1.2031	2.10684	1.23505	1.11645	1.48611	1.2511	1.11575	1.59335	1.32007	1.23414	0.672434	0.701256	0.869277	1.59796	1.89449	1.14954	1.54733	2.47786	1.23398	1.09972	1.60386	1.45133	2.0687	2.75855	2.09286	3.17498	3.39859	2.56666	3.04675	3.30277	2.11546	3.23429	2.88417	2.23463	2.01254	2.44634	2.23117
EVM0012441	4.40604	4.83984	5.35569	4.86719	3.07743	3.03374	3.08248	3.06455	2.3676	2.81842	2.41047	2.53217	1.69494	2.01176	2.05292	1.91988	3.04792	2.58212	2.20121	2.61042	4.51879	3.80483	4.58041	4.30134	2.78152	2.70522	2.93351	2.80675	2.12912	2.23868	2.0401	2.13597	2.07377	1.666	1.72055	1.82011	2.23037	2.11527	2.08956	2.14507
EVM0012446	10.419	9.93407	7.80262	9.38522	20.7981	21.2073	19.2736	20.4263	11.8012	13.3397	13.4284	12.8564	19.3458	19.4963	16.5015	18.4479	11.6243	9.89449	11.8688	11.1292	5.36036	3.53387	4.29266	4.39563	19.4046	18.3483	21.5554	19.7694	4.06249	5.30649	5.33863	4.90254	10.4338	6.49193	8.68136	8.53571	7.49395	6.46009	4.94778	6.3006
EVM0012445	0.81289	1.10937	1.40011	1.10746	1.14935	0.654727	1.24372	1.01593	1.13419	1.60164	1.02557	1.2538	1.60367	1.87482	0.673812	1.3841	1.62193	1.46118	1.42215	1.50176	0.402649	0.257168	0.985828	0.548548	3.5067	2.87874	3.30118	3.22887	1.65142	1.36233	1.12894	1.3809	5.0023	7.14055	5.34077	5.82787	3.91005	3.84679	2.86565	3.54083
EVM0012444	1.71246	2.00659	2.36316	2.02741	1.74364	1.62674	1.7005	1.69029	1.35852	1.94879	1.58607	1.63113	0.875325	0.739212	0.551945	0.722161	1.73887	0.754785	0.552588	1.01541	1.17655	1.53318	0.950273	1.22	0.746206	0.570517	0.603762	0.640162	0.466544	0.838135	0.861203	0.721961	0.596531	0.915136	0.615377	0.709015	0.553594	0.666031	0.539451	0.586359
EVM0034498	2.47068	2.52333	2.93276	2.64226	1.54669	1.37012	1.46058	1.45913	2.86295	2.6513	3.17154	2.89526	5.02914	4.97558	5.51443	5.17305	4.909	5.72801	6.11538	5.58413	3.50187	3.00836	3.28612	3.26545	2.7752	2.12483	2.08389	2.32797	2.56641	3.38681	3.1887	3.04731	4.43641	4.08534	3.69238	4.07138	4.33808	4.45274	3.98539	4.25873
EVM0022874	4.22743	4.02302	5.25475	4.50173	3.02253	2.90484	3.16339	3.03026	5.17204	4.82933	4.73734	4.9129	8.47448	9.87969	8.49187	8.94868	10.8129	11.2056	9.58548	10.5347	7.25719	7.52752	7.21121	7.33197	3.88007	3.58206	3.50539	3.65584	6.21257	5.41651	5.93826	5.85578	7.68835	6.70554	5.87798	6.75729	7.50739	7.11904	7.60587	7.41076
EVM0020498	3.8885	4.99748	5.27965	4.72188	5.97053	7.16416	5.0739	6.06953	9.63879	9.15528	8.18479	8.99295	7.99311	9.76554	8.95441	8.90435	5.2417	4.97347	5.48515	5.23344	4.2411	4.53287	4.49789	4.42395	8.42331	10.1505	9.15976	9.24451	6.6515	6.5921	6.64009	6.6279	6.75206	5.47647	6.23046	6.153	11.0846	9.54372	8.01241	9.54691
EVM0022871	40.5475	37.5664	37.8468	38.6535	23.791	21.1234	22.7752	22.5632	6.88322	6.52336	6.72606	6.71088	5.63484	4.79227	4.9229	5.11667	7.33601	7.41351	6.8122	7.18724	23.7577	22.7298	24.0151	23.5009	10.7794	9.26097	10.1458	10.062	5.03361	5.03948	4.60458	4.89256	3.80801	3.54148	3.01196	3.45382	4.181	4.44312	4.34804	4.32405
EVM0009269	4.61352	5.73291	6.13893	5.49512	13.6364	13.1919	11.7001	12.8428	10.1115	11.6644	9.84601	10.5406	5.02416	4.69731	5.06874	4.93007	6.75233	6.43849	7.09487	6.7619	5.52286	5.37673	5.43368	5.44442	5.73661	6.76663	8.33148	6.94491	7.50498	8.15008	8.70145	8.11884	3.98119	5.08314	5.85116	4.97183	5.53586	5.67048	4.30339	5.16991
Salix_babylonica_newGene_10064	1.12865	0.499772	0.515629	0.714685	1.8126	1.39431	1.69358	1.6335	1.32004	0.654512	0.621626	0.865393	0.63261	0.681749	0	0.43812	0.932018	1.07554	1.0294	1.01232	1.33442	0.974927	1.03522	1.11486	1.03208	1.38886	1.07747	1.16614	0.845494	1.15419	0.666506	0.88873	1.01048	0.895201	0.138659	0.681448	1.15093	1.54482	0.333297	1.00968
EVM0002371	0.633318	0.458012	0.851781	0.647704	0.25659	0.423237	0.5023	0.394042	0.943905	0.986773	1.13568	1.02212	0.788283	1.34306	0.934839	1.02206	0.407612	0.960184	1.24637	0.871387	1.20315	0.583758	0.7589	0.848602	0.645141	0.433964	0.793969	0.624358	1.38429	1.55109	1.03407	1.32315	0.686288	0.406322	0.800477	0.631029	0.718472	1.21718	0.783746	0.906465
EVM0009268	31.041	28.6571	31.9142	30.5374	22.4781	21.4465	24.0599	22.6615	17.8488	16.8095	16.6436	17.1007	7.95542	7.82487	9.58674	8.45568	16.4334	14.4741	16.8428	15.9168	25.4202	27.9436	29.4807	27.6149	27.2003	28.3639	25.2023	26.9222	22.9894	17.6175	20.8045	20.4705	16.3213	13.9935	15.8543	15.3897	15.3137	16.4084	16.0497	15.924
EVM0002421	14.7673	12.6729	15.4811	14.3071	7.20555	5.86883	6.2039	6.42609	6.74314	6.23283	5.58459	6.18685	46.2469	48.6018	46.9957	47.2815	29.682	33.3453	31.3921	31.4731	14.5268	14.4661	14.5763	14.5231	7.25509	5.69479	7.58096	6.84361	3.64332	3.24627	4.14921	3.6796	43.5568	41.6985	42.908	42.7211	31.595	30.0514	27.5751	29.7405
EVM0027067	0.064836	0.303746	0.484748	0.284443	0.313918	0.0722	0.284799	0.223639	0.50002	0.245926	0.751118	0.499021	0.555739	0.672114	0.680363	0.636072	0.192255	0.103313	0.162891	0.15282	0.849225	0.954495	0.884911	0.89621	0.595811	0.777757	0.619839	0.664469	0.343571	0.403343	0.467169	0.404694	0.646839	0.568946	0.671486	0.62909	0.40864	0.240509	0.440911	0.363353
EVM0027069	0.916425	1.19684	0.813657	0.975641	1.07529	1.07594	1.58379	1.245	0.723486	0.654141	0.883641	0.753756	0.627156	1.27636	0.468575	0.790698	1.17695	0.716968	0.842989	0.912301	1.90999	2.32761	2.08965	2.10908	2.33113	2.12944	1.75936	2.07331	2.105	1.64956	1.31251	1.68902	1.94092	1.96086	2.17523	2.02567	2.30289	2.38213	2.00202	2.22901
EVM0032811	6.08033	6.1083	6.15582	6.11482	5.99349	6.20651	7.09627	6.43209	20.985	22.8195	22.6295	22.1447	14.1653	18.2795	15.1254	15.8567	9.3554	9.07787	11.2318	9.88835	3.07394	3.5728	3.60028	3.41567	5.06964	4.7245	4.27664	4.69026	11.3078	12.2467	10.0314	11.1953	8.21479	8.56319	7.93945	8.23914	9.3029	6.99157	8.01837	8.10428
EVM0032816	12.8502	15.0561	13.3468	13.7511	14.709	13.9339	13.1109	13.918	10.1978	12.1338	11.0754	11.1357	17.5745	18.5412	18.3287	18.1481	16.0936	17.1538	17.1437	16.7971	6.36858	9.24848	8.96956	8.19554	9.78382	10.1014	9.58163	9.82229	4.94272	5.71588	6.72789	5.7955	12.4925	9.42364	12.1191	11.3451	11.9342	10.5046	12.6826	11.7071
EVM0002429	0.629101	0.830827	0.738739	0.732889	0.143908	0.686698	0.791499	0.540702	1.0849	1.09279	1.35001	1.1759	1.14742	1.37606	1.55454	1.35934	1.05461	0.490354	0.923072	0.822678	0.673246	0.995256	0.519146	0.729216	0.415557	0.612922	0.251325	0.426601	0.25082	0.220612	0.37274	0.281391	0.489037	0.590083	0.405284	0.494801	0.390915	0.334826	0.652701	0.459481
EVM0006335	19.4562	19.3084	20.1185	19.6277	22.0455	24.5136	23.259	23.2727	33.319	32.1783	30.6507	32.0493	33.9569	33.1875	32.8092	33.3179	33.1215	30.0008	33.0713	32.0645	21.8376	19.7293	19.3374	20.3014	31.9972	26.5088	33.7894	30.7651	35.2309	37.6165	33.5647	35.4707	40.569	37.0677	37.537	38.3912	35.3012	32.9818	36.5106	34.9312
EVM0006336	3.34844	3.37571	3.71995	3.48137	4.2101	4.07076	4.11572	4.13219	4.20363	3.52275	4.77595	4.16744	3.04022	2.76654	3.23636	3.01437	2.93036	3.93475	3.94702	3.60404	2.22213	2.34841	2.25404	2.27486	2.15448	2.29651	2.63902	2.36333	2.27555	2.31891	1.63431	2.07626	1.45857	1.79887	1.21295	1.49013	1.64956	1.71506	1.95781	1.77414
EVM0006337	9.1558	6.95464	5.77176	7.29407	2.68099	1.75747	2.31416	2.25087	1.50851	2.24671	2.53823	2.09782	1.96575	1.39988	1.7889	1.71818	0.526475	0.127688	0.446308	0.366824	0.420113	0.619491	0.207158	0.415587	1.40541	1.14977	1.60833	1.38784	0	0	0.089899	0.0299663	0.203304	0	0	0.067768	0.067263	0	0.081624	0.049629
EVM0006331	1.11458	0.421215	1.30294	0.946244	1.85529	1.95915	1.98694	1.93379	0.200962	0.428423	0.593769	0.407718	0.104804	0.52075	0.354735	0.326763	0.444949	0.366432	0.415365	0.408915	1.62346	1.24887	1.42692	1.43308	3.47567	3.3578	2.83376	3.22241	0.376201	0.269728	1.04997	0.565301	0.605777	0.242561	0.369452	0.40593	0.849813	1.33988	0.956483	1.04873
EVM0006332	3.71253	4.68788	2.87815	3.75952	43.96	43.9559	42.0166	43.3108	20.5836	19.5187	20.5977	20.2333	52.9172	49.2298	50.2191	50.7887	9.67829	12.6171	11.6193	11.3049	12.3615	13.2397	11.4275	12.3429	140.561	147.56	143.328	143.817	44.2448	37.8658	41.4496	41.1867	72.2163	78.6441	72.9548	74.6051	49.1593	52.9648	49.7092	50.6111
EVM0006333	1.05266	1.21609	1.3941	1.22095	0.500233	0.774173	0.513962	0.596123	0.35945	0.668355	0.526119	0.517975	0.489786	0.286783	0.573527	0.450032	0.799289	1.19536	0.140494	0.711716	0.412201	0.577847	0.204827	0.398292	0.090145	0.154142	0.066797	0.103695	0.212755	0.30466	0.183515	0.233643	0.148253	0.220388	0.202391	0.190344	0.170538	0.178639	0.561045	0.303407
[truncated: 21,600 more rows]
